# Supplementary material for: Clustering, Pathway Enrichment, and Protein-Protein Interaction Analysis of Gene Expression in Neurodevelopmental Disorders
Source: Adv Pharmacol Sci. 2018 Nov 27;2018:3632159. doi: 10.1155/2018/3632159 (PMC6288580; doi:10.1155/2018/3632159)
Supplement: Supplementary Materials — Gene expression matrix microarray raw files (CEL and CDF files) were used to make gene expression matrix using Affy package and RMA (robust multiarray average) method. This matrix file was used for further microarray analysis like clustering, pathway, and protein-protein interaction analysis. Pathway and protein-protein interaction result as generated from the Metascape tool is given. This file includes information about clustered formed within genes and network details with scores. Annotation and enrichment annotation file and pathway enrichment result as generated from the Metascape tool is given. Annotation file includes information about genes like gene symbol, gene description, GO biological process, protein function, and so on. [file 3632159.f1.zip › Gene expression values.xls]

	control.CEL	RV.CEL	NGF.CEL	RV+NGF .CEL
11715100_at	3.76121162659587	3.71600562160271	3.70791440699952	4.10784097718737
11715101_s_at	7.15986303312575	7.37583622664816	7.17409526728974	7.43670468833213
11715102_x_at	5.21928497629002	5.22500794589552	5.25252588618151	5.63828700268058
11715103_x_at	4.84812565206484	4.80585301241905	4.96856531245621	4.97419358831954
11715104_s_at	6.18348593203002	6.35762175342495	6.3122954475348	6.1175855074478
11715105_at	3.24572088783545	3.52152855325816	2.96970059747325	2.82109698612778
11715106_x_at	5.33986499412534	5.07371599663724	5.02766227273177	5.25916092692522
11715107_s_at	4.89862278707208	4.90459676951976	4.78904717775964	4.98105139779829
11715108_x_at	3.18295490454427	3.39333717673583	3.25679191918437	3.39942849221102
11715109_at	3.93371569261172	4.00477001512042	3.82353794714964	3.82353794714964
11715110_at	6.38092416321403	6.61837341651932	6.44706961675966	6.32872743733719
11715111_s_at	8.27951228780365	8.25499908845408	8.55730485719006	8.25436876941926
11715112_at	2.36120612011053	2.33893121954243	2.51879310664865	2.36458016811265
11715113_x_at	7.23459097103187	7.40512808471991	7.47671326372391	7.27145534232461
11715114_x_at	7.41023139808618	7.34909048828565	7.5124865338081	7.13903330611611
11715115_s_at	2.60460923432383	2.46071731422673	2.47788638027784	2.62324452818729
11715116_s_at	3.34799777144882	3.55803815433826	3.49081051752346	3.43045377733937
11715117_x_at	2.12024713226299	2.21077816711664	2.03534908568069	1.90993665161305
11715118_s_at	3.25956578300428	3.26284717342811	3.17305441851273	3.21693312119943
11715119_s_at	4.09442466025295	4.25029495602718	3.78113497239551	3.88858386393376
11715120_s_at	5.64341470935526	5.73468742210764	5.7511015999329	5.6653129810223
11715121_s_at	3.26039344678419	3.20215514472501	3.20215514472501	3.10280646024608
11715122_at	5.0163676846288	4.99515291782546	4.95745312910291	4.97866789590626
11715123_s_at	3.28972163584734	3.37928274333508	3.52634499250201	3.24370376380522
11715124_s_at	7.16005976726995	7.15127592221812	7.2536225871578	7.16829060091185
11715125_at	5.05757774584342	5.10223090597965	5.03199914085829	5.13280020339788
11715126_s_at	5.67383746767528	6.04777181299264	6.25875705180127	5.80370486048979
11715127_s_at	3.76300228838968	3.79342017730639	3.82704681556321	3.66460900590158
11715128_s_at	6.74179518254842	6.91885342386179	6.74482276595207	6.97515980471418
11715129_s_at	7.96194662227342	8.08578795111935	7.89841734604684	7.9115036351989
11715130_s_at	5.95601111054563	5.99956141910969	5.96311665964096	5.92078806022684
11715131_s_at	4.34161772472055	4.51029104943916	4.48122446029075	4.53000137711339
11715132_x_at	2.03387791752283	2.18628650876683	2.42669449724665	2.23751551390315
11715133_s_at	2.05249822697127	2.05127702426922	2.25791077999851	2.1158181499707
11715134_s_at	2.30915904852261	2.52587961186015	2.28594316869276	2.59795070816601
11715135_s_at	3.46098624424602	3.40383084400368	3.55431376516481	3.47814437507025
11715136_at	3.76449037800697	3.47546342803659	3.79060749553019	3.65832737485712
11715137_s_at	8.32306815178452	8.39752008141669	8.34524676599085	8.28932595895558
11715138_s_at	8.16476153264004	8.37632514910465	8.57387555504092	8.29209817231418
11715139_x_at	2.04343584330282	2.21474703114771	2.20596305726339	2.30813040844602
11715140_s_at	4.92063477901438	4.88350369181825	4.98963781107848	4.84812565206484
11715141_s_at	5.11231971886689	5.19305777296542	5.1414027774115	5.09269924749531
11715142_s_at	3.27255684522685	3.06074315054478	3.41097247750434	2.88191853561161
11715143_s_at	4.30544966573471	3.98166524350036	3.87867108522358	3.87086927259941
11715144_s_at	5.42392337894939	5.44682019775057	5.33651390023283	5.40151489557137
11715145_s_at	5.19232688666365	5.01412300699483	5.11924502773142	5.0288651384024
11715146_x_at	3.66596467332996	3.7280095788539	3.67518332978067	3.80358251861475
11715147_at	2.62299207182248	2.47070776036356	2.8039456123258	2.60781690707244
11715148_s_at	2.98753396421838	2.7783138489813	2.83275568288252	2.73142859433149
11715149_x_at	2.97325982876609	3.15770863165116	3.16626532886574	2.90130988589686
11715150_s_at	6.69417844494743	6.67948924017445	6.531368623498	6.64447037113852
11715151_x_at	3.92853538535409	3.90572520586447	3.80110728304606	3.91308530174835
11715152_at	2.53449235767722	2.65829217850928	2.73423637081068	2.65096896179558
11715153_s_at	3.37396365706771	3.34086021655778	3.68694877552894	3.599917282359
11715154_s_at	1.99179757415411	1.98551510861489	1.96666771199724	1.94584972484105
11715155_s_at	7.30021383914714	7.41401644757357	7.20183398014634	7.46475321658753
11715156_s_at	9.25861434742934	9.18839204558657	9.26502701247896	9.16262879805203
11715157_s_at	3.20235844551905	3.40896549614987	2.95355930482063	3.25675958677961
11715158_s_at	3.04647501215157	2.93882941385726	2.93741992705911	2.9795266693303
11715159_at	4.62170452545082	4.56818494461768	4.85226704033224	4.78510004212462
11715160_x_at	2.74619393200019	2.87055104011802	2.99940447698018	2.92734144492061
11715161_s_at	4.88257404496008	5.19594536646304	4.57463565507043	4.86403387312319
11715162_s_at	6.08744537912328	6.17996579135903	6.1329571603822	5.85041402701072
11715163_s_at	2.49205677300159	2.35988039077331	2.5110621128935	2.35988039077331
11715164_s_at	4.83798300638198	4.93336867010497	5.11987887322198	4.77592402844794
11715165_at	3.86440184392317	3.96380604471986	4.04011814184061	3.65086534702662
11715166_at	4.00532083935895	3.87266182782932	3.91688204625194	3.8640356968582
11715167_at	3.38701701881474	3.48048830972975	3.55299485384158	3.57387168702806
11715168_s_at	5.84398022168053	5.66318325853183	5.87649674108374	5.62599802264227
11715169_at	5.82759481833957	5.95016971490892	5.92479295933549	5.92151399442243
11715170_x_at	2.59298148316101	2.46625862911502	2.8414479494412	2.66870434084885
11715171_at	2.98340102610443	2.88881418578975	2.66395778519652	2.78043438931488
11715172_at	2.50577069414334	2.66133339371097	2.73743334557185	2.64484837179177
11715173_s_at	8.60029355539068	8.72961794633263	8.84805365396927	8.72618683666782
11715174_s_at	7.65795285168731	7.83600084046877	7.73423699038967	7.70850545556855
11715175_x_at	7.97072831072474	7.99126548234837	7.98536323299197	8.01742701803978
11715176_at	4.06566290533508	4.18580052008312	4.4648822026028	4.25220089246412
11715177_s_at	2.57762436502945	2.46339128837341	2.62640128185209	2.64711263902642
11715178_s_at	8.63798032311858	8.93810690538355	8.78909685077898	8.73357283240704
11715179_s_at	3.79040184283861	3.67867275571504	3.65255477165591	3.81416043617479
11715180_s_at	2.30524245296255	2.45938855439621	2.48413430186954	2.53960797229098
11715181_x_at	8.25432499974058	8.31535272792046	8.28349660455922	8.02695364415317
11715182_x_at	7.30497291529474	7.17699177237345	7.37630131281147	7.23089451606582
11715183_s_at	2.26466816942324	2.20649068669512	2.34655669831034	2.26647848570492
11715184_x_at	8.2714198283707	8.25063746181041	8.29234889489315	8.31811621755933
11715185_x_at	5.28179083861267	5.3631514198594	5.47840007829535	5.11521991229531
11715186_x_at	2.75987160587856	2.82916596617099	2.97608650605022	2.64484837179177
11715187_x_at	4.53332443024096	4.52208908989774	4.5153694747916	4.38722093270105
11715188_at	2.38320470052345	2.45458120220051	2.31253931501234	2.4194588139003
11715189_s_at	13.0628802608449	13.0668878982001	13.1667684349641	13.1506978277363
11715190_s_at	2.21882656982413	2.2218032540058	1.94495985911584	2.00236834044196
11715191_s_at	2.10983246556207	2.17403566578921	2.09726753448363	2.10983246556207
11715192_s_at	2.23816561285762	2.35443057780904	2.17060890296432	2.38110002499442
11715193_s_at	7.14515578620997	7.35241702819514	7.33024393653535	7.12882793015066
11715194_s_at	5.96730696230157	6.04898937064761	5.9224531791668	5.85068625838245
11715195_at	2.41779585274899	2.58770947030978	1.99517926189786	2.14822993598427
11715196_s_at	5.90752481314419	5.75461156549539	5.75461156549539	5.4729316418851
11715197_s_at	3.91428662140255	4.03985930951634	4.00119000330426	3.998073799376
11715198_s_at	7.02700820003453	7.18149911851908	7.12558982859944	7.22775377867625
11715199_s_at	7.30512373741988	7.31768319530509	7.41568529308156	7.38274001426834
11715200_s_at	7.2810726079085	7.3475722680828	7.4403677178645	7.22327039844389
11715201_s_at	7.29935437855053	7.31915952454161	7.37746063275902	7.22528433046391
11715202_s_at	4.11993220271832	4.13888996720648	4.23328003657448	4.22105465771926
11715203_s_at	3.42146157061351	3.62521552090375	3.29257842048439	3.66631188711885
11715204_x_at	2.40456691029109	2.20672325640267	2.47151034398296	2.31861120482678
11715205_x_at	3.58485983529646	3.50748254037013	3.42648332670398	3.51719263565787
11715206_x_at	3.58485983529646	3.50748254037013	3.42648332670398	3.51719263565787
11715207_at	5.66382447999841	5.68563805018306	5.25987573977178	5.38255334213651
11715208_s_at	4.49318924473673	4.58590672992719	4.19488762926853	4.38621936648458
11715209_s_at	9.34600336537979	9.55383743202067	9.49032209406337	9.53915721511399
11715210_s_at	4.45514592671031	4.49010573410662	4.43664038038654	4.48136578225754
11715211_s_at	2.46238835270411	2.56636020727915	2.55367202616792	2.55727984584769
11715212_x_at	7.54264692287903	7.75803142582337	7.67043766303744	7.74010682113049
11715213_s_at	4.54594225508423	4.35359186976335	4.66480160024436	4.66480160024436
11715214_at	5.00615967277101	4.85818966547552	4.94611204706026	4.90736371445852
11715215_s_at	4.09715856831255	4.12388988414958	4.01143091097316	3.89164091939559
11715216_s_at	2.44618171452026	2.59989664537851	2.60836239941428	2.57290456856625
11715217_s_at	4.57483286334317	4.4569036620692	4.81508560795316	4.72462377673995
11715218_s_at	4.53626561853803	4.55038719981173	4.65925028426162	4.53626561853803
11715219_s_at	3.24423389530158	2.8528087181432	2.95344108278255	2.82761621108316
11715220_s_at	2.80603498231743	2.84567401701969	2.69945010835517	2.715504021732
11715221_x_at	4.69379968847246	4.33144901620751	4.49779178216171	4.63840912650105
11715222_at	5.75440982663181	5.47820437614494	5.60026372519815	5.58103460832366
11715223_s_at	5.79237405297829	5.80087863384644	5.84437015053848	5.82652758241665
11715224_s_at	4.71985030242353	5.09604449179155	5.33616094901503	4.70613595424437
11715225_s_at	3.93592819705249	3.73895770527101	3.81362746298447	4.09136783759193
11715226_s_at	5.37052280324488	5.13958003360322	5.56108253966436	5.4237863424299
11715227_s_at	5.44806459024795	5.14117410964695	5.47383166604235	4.96683786191048
11715228_s_at	4.24602571080886	4.40899373815465	4.23252123374997	4.69761782193496
11715229_s_at	5.14270739087597	5.19906207827609	5.32077526035634	5.2708182049067
11715230_s_at	5.81932275946292	5.66897539774975	5.72860418687234	5.77775209871116
11715231_x_at	8.60640216607773	8.57966659008083	8.50083860165421	8.50626219026082
11715232_x_at	6.18472369701791	6.07248424512813	6.16228501572087	6.06931831660954
11715233_s_at	3.63026960883152	3.83642460337547	3.73823719341102	3.84668295663565
11715234_s_at	4.62876246448066	4.47419843156807	4.48519874259522	4.48060568437038
11715235_x_at	3.87612259236055	3.94305879589947	4.24240365610348	4.11829992839576
11715236_s_at	3.42559565530038	3.55909798874644	3.29540042849506	3.59484055188352
11715237_s_at	2.21151229988323	2.03036478696281	2.27309913681624	2.29268812658676
11715238_x_at	2.66311866443013	2.90082962210626	2.72935487904904	2.54458623598959
11715239_x_at	5.92685297994114	5.75356009958605	5.92375272176585	5.78579942086677
11715240_at	2.47657983588312	2.33673430227239	2.61922446181252	2.46983537339937
11715241_s_at	9.37334683993543	9.53524374596214	9.56370036512221	9.2886190666021
11715242_s_at	5.6947707078004	5.96278925675444	5.94319360029641	6.03095100566981
11715243_x_at	8.11066182463836	8.15159073649178	8.26605734990589	8.1692611092888
11715244_x_at	8.21800179317465	8.09058612869869	8.18073672689356	8.10180868821149
11715245_s_at	5.67369480986072	5.78623291598323	5.83133021352817	5.67774163169298
11715246_x_at	6.27354529610733	6.23693862523934	6.35160171941252	6.21736889066718
11715247_s_at	4.67280739763486	4.91274384080225	4.75253427059818	4.82179129948015
11715248_s_at	2.53968700348051	2.39561013642159	2.40815089713465	2.46453104298473
11715249_s_at	2.30970562346855	2.15048938684195	2.04343584330282	2.21272538798273
11715250_s_at	2.55946867025709	2.39546853483671	2.45404496362924	2.34307039863994
11715251_at	4.38621936648458	4.30611228579447	4.42551207789446	4.14295876348669
11715252_at	2.27227645970303	2.48697161182722	2.16349011499337	2.4785966214322
11715253_s_at	7.94505384216169	8.06313636739656	8.11602560477801	8.04031049271195
11715254_s_at	3.93748869888335	3.87963159699999	3.90511077519557	3.94914879699493
11715255_s_at	3.15795753812874	3.17444256004794	3.14814403214912	3.50215343676503
11715256_at	2.58862917000893	3.0683594482099	3.1463600125299	2.77544949621886
11715257_x_at	4.56829758670226	4.23395294285393	4.54825859207344	4.54852670759949
11715258_s_at	7.58858564775114	7.73282197464986	7.6933397090454	7.52194726736943
11715259_s_at	2.96462566461581	2.83703977498927	2.90922090854695	2.73179668144846
11715260_at	3.69765237281928	3.7236352741964	3.87237860064999	3.46991262158288
11715261_s_at	2.51566261768987	2.52919531736281	2.4792405946224	2.37207111834721
11715262_at	5.17451119703752	5.1752700712797	5.00484906976678	4.82888345735386
11715263_at	3.00391512774163	3.09890563348641	2.88039772157436	2.81599444776966
11715264_s_at	6.51529685302449	6.59177751716511	6.52199224447108	6.55840307375436
11715265_at	4.5497075748721	4.70642958543336	4.50359236827569	4.62210965568609
11715266_s_at	3.16304063431156	3.18025327603593	3.16304063431156	2.96931911581505
11715267_s_at	3.22688418675546	3.12258286279338	3.04886989101655	3.15317121497863
11715268_s_at	6.26735969588849	6.45490169969107	6.40076113488232	6.48632105793835
11715269_x_at	4.78584963919644	4.77964820924973	5.06009451727235	4.95925744824317
11715270_s_at	6.64483222130996	6.43502080885725	6.23778240066516	6.40479888773152
11715271_s_at	7.20607270272927	7.48062662707374	7.39950710585051	7.16821328668646
11715272_s_at	2.23567873819692	1.82183535844241	1.96178272832422	2.30584228641146
11715273_at	3.86845784358473	4.1120214001603	4.03837146114552	3.77786712454176
11715274_x_at	4.10586873210081	4.53400235970117	4.38918763433306	4.18330924650416
11715275_s_at	1.97102162219319	2.06969405320541	1.90469920727223	2.23505965769854
11715276_s_at	4.38183304815201	4.40517704412619	4.22967727325755	4.31050853902691
11715277_s_at	4.75866844167758	4.83904858186138	4.58450679504722	4.72084745104017
11715278_s_at	4.86299257022237	5.0789072929688	4.90236899318112	4.9868540719423
11715279_x_at	2.53232877278311	2.40077769106345	2.48369915705892	2.22560832383273
11715280_s_at	5.72821648635118	5.78182177645242	5.68264762981819	5.80656195530724
11715281_at	5.48295834058823	5.40938219412027	5.48379716649892	5.45049313464057
11715282_s_at	8.16785564737964	8.376227269904	8.52666369033916	8.39877919358498
11715283_at	4.55306700126229	4.42798313859042	4.59567007185782	4.30853733575076
11715284_x_at	5.82869275096066	5.91062577245767	5.85248168498169	5.96619638028249
11715285_at	3.06983530532999	2.74225425626026	2.81675453625192	2.66260843481826
11715286_x_at	3.25361412181362	3.16626532886574	3.27687504155081	3.04055346485407
11715287_at	3.49611713394615	3.79233684170108	3.70804854940427	3.56268633666485
11715288_s_at	3.47217500925579	3.28978681462228	3.3634480165769	3.13840999031691
11715289_s_at	5.7424300791866	5.73705273488325	5.87899418510365	5.59988960668577
11715290_s_at	4.36185411423885	4.13378501344766	3.99337588358745	4.040682109089
11715291_s_at	4.06756227255589	4.10879612558828	3.99247768765861	3.79931216971489
11715292_at	2.62300452902121	2.75857018184535	2.63720439808627	2.76413250094884
11715293_s_at	2.11063828078106	2.05010857643228	2.11063828078106	2.16571815250752
11715294_s_at	2.24338859177151	1.90503172057776	2.2038058643981	2.03929245413145
11715295_s_at	4.48152789739498	4.49180013901503	4.45497853848547	3.90265453054205
11715296_s_at	7.17749884247088	7.39363365903484	7.32982371654636	7.17721089037209
11715297_at	3.98451719969098	4.13662572791761	4.03859866060789	3.8154344547447
11715298_x_at	3.31469812041793	3.09337346495128	3.0354141741959	2.91367383493185
11715299_s_at	4.77486182013537	4.69586447412662	4.86553296102905	4.42160949945987
11715300_s_at	2.26111333815259	2.35984377483996	2.04780797816563	2.20276052955903
11715301_s_at	6.2805233075351	6.55586063172374	6.43100936599705	6.44150782348577
11715302_s_at	4.7905303971136	4.77694766017815	4.88123211036215	4.83515229129135
11715303_s_at	6.64589987009219	6.69272612022491	6.77054781761632	6.79124296868476
11715304_s_at	4.89118124523662	5.12138514823865	4.96858978244745	4.88050372981598
11715305_s_at	2.80720587825332	2.897356221604	2.65146132091551	2.92576999566143
11715306_s_at	2.31950817184941	2.10644751488986	2.03432985368222	2.17835347358791
11715307_s_at	6.8816712534707	6.64904859297422	6.90120439755598	6.74731975390738
11715308_s_at	6.71322162978696	6.80166285709265	6.92311068498299	6.86417595218127
11715309_s_at	6.77413296276876	6.76914674273693	6.83288486032357	6.73274119193075
11715310_s_at	6.90121210584679	6.83612500572511	6.93935042694057	6.82300152061276
11715311_s_at	3.08593082252018	3.09892773065458	2.69141931261594	3.00554435335627
11715312_at	6.13278001036874	6.39565797483479	6.3264146905491	6.20357963513966
11715313_s_at	8.59696585647857	8.9070429283461	8.93994885571336	8.75951898114987
11715314_at	4.75967206470988	4.95550233647448	5.06211215250516	4.51129224156621
11715315_s_at	3.44142764093493	3.65298377802022	3.98209127099867	3.55423826321782
11715316_x_at	3.33644225608403	3.26944494555308	2.92646962834188	3.14551722734004
11715317_s_at	8.17111775088116	8.44021181541835	8.57243812087565	8.41119334134091
11715318_s_at	2.9919998309038	3.19135186700757	3.32437972166958	3.19563742728411
11715319_s_at	3.04137736739108	2.8524228927794	2.97977887898472	3.10461265279587
11715320_s_at	3.27799441598931	3.27603353182412	3.67939331552907	3.23992653082036
11715321_x_at	8.71038194001593	8.92483750448932	8.89127859195545	8.8494165764211
11715322_s_at	2.44597949150837	2.29488862289302	2.22638500575081	2.10174494939196
11715323_s_at	6.08309702431288	6.16798800732018	6.1282941356104	6.09331963819098
11715324_s_at	4.78285070141521	4.72492836764261	4.83522295855704	4.70813168238297
11715325_at	9.2454457626437	9.2031915680121	9.01052530034488	8.97691040963402
11715326_s_at	5.379738110043	4.88242729763575	5.19784928288345	4.79291576784616
11715327_x_at	2.0666584671004	2.37286694364591	2.42575412201104	2.02469588287918
11715328_at	6.82419969915895	6.87301950143537	6.7958637654944	6.69979871029361
11715329_at	2.8727349088347	3.25666182573037	2.97317068447294	2.87318516534252
11715330_x_at	5.41546898867694	5.62846385173099	5.56520128124371	5.13818009734569
11715331_x_at	2.23347641423612	2.41888697879257	2.281175836456	2.62559061164172
11715332_at	4.87563772145877	4.73544160909059	4.75589161769373	4.69062542352501
11715333_s_at	5.78842767104285	6.04983062607761	5.75754321530849	5.95901821161468
11715334_s_at	2.3675274870491	2.41916575619781	2.39330516916068	2.3074166004626
11715335_at	4.91872914036056	4.91872914036056	4.81550978426313	5.14428514180479
11715336_x_at	6.24277072780401	6.26251361964087	6.22784194312378	6.21600377736559
11715337_s_at	6.75276023919378	6.74741718170065	7.09314365936175	6.73851116762364
11715338_s_at	5.85172849066267	5.74709244327217	5.74792255770005	5.62463922174145
11715339_at	3.43598793018001	3.09746715313687	3.27662561892237	3.31903955540667
11715340_s_at	2.84123471601672	2.84123471601672	2.84980412666218	2.70594245132527
11715341_at	3.1016844037359	3.02220865003403	2.98058702203369	3.31475369488355
11715342_at	3.13573882654521	3.11226353311912	3.17743530320955	2.99012732053396
11715343_at	4.56422574097297	4.57182127489736	4.6730494824047	4.46408549275895
11715344_at	6.20489271211341	6.66148224567869	6.74482276595207	6.66725478137538
11715345_s_at	5.63292369891468	5.82867070994954	5.72246527575927	5.56805395427706
11715346_at	5.54931664579029	5.43816564962009	5.51035307398252	5.65465957061679
11715347_s_at	5.68107122077547	6.01211273580671	5.8640493027085	5.94766058147324
11715348_x_at	7.97925057420016	8.14424110816446	8.05945453360291	7.97440986845024
11715349_a_at	3.04137736739108	2.89939015860593	3.08981522204412	2.93425172621523
11715350_a_at	5.31894890339525	5.02589349734022	5.15353659483401	5.34074854790381
11715351_at	5.17362918605177	4.64600785032947	4.54121013962617	4.58781794354606
11715352_x_at	3.55638050761365	3.42713848389016	3.52152855325816	3.37416601117174
11715353_s_at	3.017455760663	2.8673663589953	3.11386601861409	3.11728893605328
11715354_a_at	2.49278807029799	2.44281534557336	2.5141205778966	2.33392154902538
11715355_at	3.50285935289603	3.70619598910761	3.41133538086583	3.57722783887912
11715356_x_at	3.08124716479865	3.04543546330577	2.94937464902374	3.04543546330577
11715357_s_at	12.3379645370621	12.4259669665466	12.3162680447121	12.4584906146264
11715358_x_at	5.49468421492936	5.64346058534697	5.23067969061374	5.47203740666471
11715359_a_at	5.82554008652675	5.76513891747106	6.16224111725031	5.78417442971181
11715360_x_at	5.63908972707984	5.78040572990276	6.1295582555974	5.75131264278672
11715361_a_at	9.43753022884746	9.89502382723226	9.5593130087557	9.98683136694772
11715362_at	3.43912137333482	3.45179552101833	3.74304573178164	3.57779499119141
11715363_a_at	3.99388188666017	3.84066087877189	3.74232241749213	4.02098056546492
11715364_a_at	6.66858875954981	6.50450798809006	6.54688176016424	6.54688176016424
11715365_x_at	6.64514500355815	6.60314744637369	6.44104886591809	6.53972129693031
11715366_a_at	3.25482633452188	3.16626532886574	3.28357077987727	3.31873933319904
11715367_s_at	4.28717714217348	4.22671519559824	4.12843360502353	4.17689354137488
11715368_a_at	2.92362206488578	2.95796414399965	3.04302829988504	2.90965461530545
11715369_s_at	4.9899266027404	5.09491207396867	5.1372989353386	5.01869521036924
11715370_s_at	5.97152463136148	5.88872321138325	5.86603156280934	6.02979512861327
11715371_a_at	6.69499124104893	7.10449940878387	6.87743840743551	6.98747834770621
11715372_a_at	4.62576189841738	4.28773491358817	4.49242851415087	4.00797731493992
11715373_a_at	3.91096284154559	3.59052840652447	3.90922792012363	4.0923785607187
11715374_a_at	5.44133788669484	5.35493009879444	5.51695599393213	5.44292866505502
11715375_x_at	3.03559797984695	3.23992653082036	3.32480017863931	3.33330990811867
11715376_a_at	3.85323433125598	4.05150950882691	4.43537761536438	4.3990670559817
11715377_x_at	5.45491767961663	5.63304317274827	5.65012074153726	5.59368655736419
11715378_x_at	4.86564199980512	4.8930091984941	5.00794387781177	4.89166804785082
11715379_a_at	6.46136440626605	6.4512135205503	6.55502696755053	6.5625516673942
11715380_s_at	2.42606566791621	2.47025158456063	2.51443750120505	2.47025158456063
11715381_a_at	2.83547434828856	3.23992653082036	3.06194332069006	3.1169050860403
11715382_x_at	7.08180658933919	7.06887322866166	7.11313243311472	7.0476741903322
11715383_a_at	2.68493998841324	2.62387959556426	3.10375793796968	3.17114991232501
11715384_x_at	4.1131761111448	4.50104144478074	4.29707304057275	4.48051795009859
11715385_s_at	4.10705550875084	3.79364570162786	3.72771721878351	3.8875891116104
11715386_at	5.20851681744296	4.78835483691318	4.9455712459927	5.11576019070084
11715387_at	5.96337851062623	5.93596195618688	5.98686289010105	6.00577647321798
11715388_s_at	6.06081711595325	6.14612421768203	6.12346196086711	6.09317128984914
11715389_x_at	3.6339235128917	3.37685944745274	3.36897414416487	3.51832800030176
11715390_s_at	5.11149314282676	5.1089312311226	5.07726760072042	5.30488447064473
11715391_s_at	6.03290803224067	6.04168929244927	6.04530734082452	5.95491877649122
11715392_x_at	5.97152463136148	6.09801474828483	6.08707404289352	5.87184050826411
11715393_a_at	3.78168706146336	3.59776117122575	3.80642839455288	3.62596983639398
11715394_s_at	5.12604526301088	5.08800758266051	4.96571031969837	4.86904930052692
11715395_a_at	2.11767981491502	2.30463548827561	2.17056699328015	1.93511823122449
11715396_s_at	2.72533263469263	2.83693277287988	2.72773376609197	2.66915639557237
11715397_x_at	6.91477675924906	7.09457758473572	6.919933866744	7.03994319327167
11715398_a_at	6.62827760206462	7.17206546266584	6.98976942430079	7.18172362809621
11715399_at	6.66615913395334	6.67543468881105	6.46237004458327	7.19078770335102
11715400_x_at	5.78788110157858	5.72453249506875	5.53086979624468	6.25433805364809
11715401_s_at	3.15600409812739	3.28525071091741	3.06535573793329	3.05722143199452
11715402_x_at	6.05308655655237	6.24190623758121	6.2334764940988	6.41096950948146
11715403_a_at	5.43076875077416	5.38717042227182	5.43076875077416	5.49429238028073
11715404_a_at	5.50289938025703	5.60070654812512	5.75171790819405	5.71618450815077
11715405_x_at	6.77399788885401	6.89790392031971	6.91161795906283	6.84501674195458
11715406_a_at	5.21954240367501	5.28704097814336	4.93007635333136	5.15380321646783
11715407_s_at	3.98825416618628	3.86899579880613	4.14806182182088	3.87613957715633
11715408_x_at	5.51140725477882	5.71504424321271	5.60576476591299	5.62767197625037
11715409_a_at	6.9943441237393	7.18734392622099	7.14337391877493	7.23600631513622
11715410_x_at	8.61894216814446	8.77266922343801	8.53852147004621	8.85787831055455
11715411_a_at	3.17312210807561	3.20776414068023	3.3238725260908	3.33995244827317
11715412_a_at	5.84264592558084	5.82592701835464	5.98056212972902	5.92496040550262
11715413_s_at	2.26660498246804	2.39131640698175	2.33956511664169	2.33956511664169
11715414_x_at	2.06415100970626	2.4086393003698	2.21659926943068	2.15048938684195
11715415_a_at	3.09747836409546	3.32920513196539	3.16823790147799	3.15832657206238
11715416_s_at	6.03272275582374	6.40224858385756	6.05303382960722	6.34947059040211
11715417_s_at	8.97964865489992	9.57442041050164	9.38508240467318	9.74030503110705
11715418_x_at	6.88873322845071	7.04286998088152	6.94386698498097	7.20781944485353
11715419_at	4.58183591369421	4.5427656463625	4.59009174072079	4.55888572472838
11715420_a_at	4.82316042806923	4.71686368525489	4.68252160614102	4.90737109782038
11715421_a_at	4.94554653418775	4.95401890290338	4.98813538763581	4.97923529216045
11715422_a_at	6.66166056210153	6.58737320252887	6.98238285605219	6.70863861628872
11715423_s_at	4.67018548982344	4.50797909063471	4.87607954097603	4.41204211382279
11715424_x_at	6.74446184388563	6.96643134189088	6.74331357313917	6.80307130766583
11715425_x_at	7.68731984356836	7.84898230774901	7.71620844326952	7.79338591517697
11715426_s_at	3.79820119498049	3.90229557911118	3.90229557911118	3.96685097534981
11715427_at	5.22536984808747	5.22461774489829	5.40428652250677	5.21947423487529
11715428_x_at	3.41655392330088	3.64062558637026	3.64062558637026	3.95980123579664
11715429_s_at	2.17432935619184	2.27238686097611	2.33302116887967	2.1417378283152
11715430_a_at	7.13304679911936	7.24194976099832	7.33704116850467	7.13086655079217
11715431_a_at	4.13494590759905	4.38926576168857	4.32124916227002	4.16746928088587
11715432_a_at	3.98664524026053	4.27678240664937	3.90530227315848	4.02034106919319
11715433_a_at	4.30175235458987	4.09335797043034	4.06684821704654	3.91785866751677
11715434_a_at	6.4025972505559	6.52011251012149	6.3847594950743	6.49507919415963
11715435_s_at	2.69204527089786	2.70747259523969	2.90274802692569	2.30463548827561
11715436_at	2.49010298722866	2.64360045969044	2.68427437942036	2.36864492097305
11715437_at	4.89990223858048	5.31019334234888	5.25852237610557	5.22216475629744
11715438_at	6.10305802521883	6.10714965384831	6.15505412277903	5.94966242011798
11715439_at	4.61334101799369	4.87556272952147	4.79384734304197	4.50155297432061
11715440_a_at	3.5474495373718	3.62503067037786	3.30052878771839	3.29863051514033
11715441_a_at	2.99554142833552	2.90444251522977	2.5011824433857	3.0008819605517
11715442_s_at	2.48076611428902	2.3770735279065	2.33146108877862	2.19113936983369
11715443_a_at	4.37473077310282	4.3431742314857	4.35438745271047	4.35438745271047
11715444_at	2.42441674635951	2.26570884265938	2.32118251308081	2.22325841135595
11715445_a_at	5.38793463442927	5.70041705563408	5.71544257327522	5.69884481021319
11715446_a_at	3.70191712521872	3.74983878477897	3.87656163882496	3.74983878477897
11715447_at	4.05488223753315	4.24307894470343	4.0308619880444	4.20052363829257
11715448_at	7.02578738223455	7.16489865195571	6.95212618027993	6.86417595218127
11715449_x_at	6.45880729494911	6.76295282335855	6.60659800047539	6.46223012358411
11715450_at	4.79470012297289	5.34087156550013	5.06913631078719	5.06913631078719
11715451_a_at	4.42619704260944	4.41672629254871	4.37510244944997	4.39520540423599
11715452_s_at	5.27286339282623	5.24009856625826	5.22166886682063	5.13984021082655
11715453_a_at	5.67106887371979	5.63660151172207	5.39755732335856	5.62164313423957
11715454_at	5.65422861390201	5.69895549284575	5.85602771095346	5.67658753709776
11715455_x_at	5.63124152854918	5.84221684728978	5.87649674108374	5.65336468474949
11715456_a_at	7.35695261535718	7.54495807444103	7.48984135447752	7.34428860070401
11715457_x_at	5.77256176309278	5.90184177730061	5.76528497038326	5.70117230356359
11715458_a_at	8.25092490073834	8.38092476684652	8.5067759827414	8.32339343473516
11715459_x_at	7.48182137486174	7.54776715933831	7.57079261345626	7.47384640595933
11715460_a_at	4.1057839584575	4.03652013843801	3.88985888484944	4.16759666334646
11715461_at	2.69259730711561	2.76522738964133	2.38414402734311	2.50098669645486
11715462_x_at	2.74204491399382	2.86711061920641	2.70952107129591	2.84808920684237
11715463_s_at	5.08616301640907	4.84310978718621	5.15934684910059	4.83342222893965
11715464_x_at	6.84911468373992	6.93153928515014	7.00949238230398	7.0649168883101
11715465_at	3.99456044463202	4.12499041317029	4.25116018126572	4.02000494194203
11715466_at	5.248001385542	5.53575454103088	5.26957528853515	5.13984021082655
11715467_s_at	4.46216531122548	4.50523646056121	4.63532655644907	4.38621936648458
11715468_at	6.9943441237393	7.01295962136882	6.91287948209746	7.0049130384518
11715469_s_at	2.17758662864823	2.18024541056078	2.12735823219566	2.06168526642258
11715470_x_at	2.51391805529274	2.61900862653619	2.41902085872486	2.5745611800556
11715471_a_at	6.71742389429073	6.95565002179452	6.89240290910222	6.72450691174726
11715472_a_at	8.93857378849338	9.17293391249967	9.36420290593705	9.12970067729758
11715473_at	6.80364318860133	6.73438022200845	6.77685255149485	6.77685255149485
11715474_at	4.37729075015551	4.30682305734847	4.54838088483122	4.1976807177444
11715475_a_at	3.365333108638	3.49957719109736	3.43609264602053	3.41821660985064
11715476_s_at	6.13718131280836	5.85172849066267	6.1036540448594	6.03794951056396
11715477_at	2.01423791123171	2.43911347062225	2.37222055411486	2.15048938684195
11715478_a_at	3.37587952500457	3.57866225978486	3.51745715482213	3.75050974246162
11715479_a_at	5.09864355874947	5.29685800718336	5.21029447595929	5.46817027878036
11715480_x_at	3.72531764262823	3.79672937721011	3.71724683305337	4.05298151452235
11715481_a_at	2.55508742602614	2.35092202366152	2.228669034878	2.27350082129176
11715482_a_at	2.13500923141253	2.39426023473262	2.25251705141293	2.27412092116834
11715483_s_at	3.78583430274094	3.59646420576607	4.07123441437943	3.85753650150168
11715484_a_at	3.87111256263491	4.24908935361751	4.06315728391864	4.42734100620912
11715485_a_at	8.16238718418233	8.32827808274355	8.50316379211536	8.44333783385557
11715486_x_at	5.9943348108511	6.02234954508315	6.01164798197576	5.87022780619531
11715487_a_at	2.40515977737912	2.39571948192187	2.36739859555014	2.12340620425495
11715488_s_at	4.65494679410916	4.6254292631244	4.65494679410916	4.52544332668559
11715489_a_at	4.95991653540416	5.23760566375179	4.98276536221053	4.9775369049887
11715490_s_at	2.68221355053809	2.25267651203057	2.32277742988114	2.41726418181126
11715491_s_at	7.64412264069932	7.75652160641578	7.40075166714756	7.51803320432414
11715492_s_at	10.3429874731213	10.3349693962938	10.4132740709908	10.4235842183583
11715493_a_at	2.90488713705222	2.76236985153569	2.79010216339336	2.90488713705222
11715494_s_at	3.5909109670454	3.15892735797674	2.92367313940718	3.47651008327141
11715495_a_at	7.89564640035836	7.84345274779834	7.71360244906153	7.60218103820697
11715496_a_at	5.20302645429995	5.32665572906919	5.23230038853738	5.18009323569835
11715497_a_at	2.90160661584891	3.07682902538954	3.25149671227414	2.90817292172031
11715498_a_at	4.6249302956522	4.88509090458639	4.6820519031448	4.70863117766507
11715499_x_at	2.44272616977091	2.29757559581836	2.18465700657502	2.27393755575545
11715500_s_at	8.58138148688345	8.35940068338363	8.514035794758	8.52124977064835
11715501_s_at	2.4342807573499	2.3635500438015	2.45759814012688	2.40595987097817
11715502_x_at	7.12391650780499	7.3293638373702	7.20367568445784	7.44115290657027
11715503_a_at	3.08770052040627	2.73364044563578	2.991740507947	2.79176937389795
11715504_a_at	6.0634022526901	6.00001115670757	6.03250381815384	5.85699205117478
11715505_a_at	4.8160300285886	4.88116316315376	4.94538969950617	4.8013371032807
11715506_a_at	7.8822665992958	7.92069150214436	7.64239032871788	7.77818349684338
11715507_s_at	8.9768695883549	8.96695141470327	8.83989402156301	8.81764843227821
11715508_x_at	7.36626918612202	7.37223994305578	7.25656129738202	7.23151929081999
11715509_a_at	8.78308745731848	8.90224483533571	9.09579259076518	9.16428124607473
11715510_s_at	2.92312316553604	3.17343739788979	3.03548505123961	3.21400316110649
11715511_x_at	7.31961061506008	7.38603020698021	7.36942820819388	7.55120501363148
11715512_s_at	2.39645182178119	2.47818502776836	2.44312763257304	2.42410187821967
11715513_s_at	2.73383459725418	2.56851946969284	2.59779940685085	2.52360969271924
11715514_a_at	3.19076364003329	2.99774641204552	2.84360031061186	2.98232976196981
11715515_a_at	5.23586244541525	5.11786097585499	5.27255511110176	5.01571939627135
11715516_x_at	5.19000456511395	5.71250308319032	5.27303034600301	5.32880386206305
11715517_s_at	6.35753752382699	6.50643532434318	6.39826618469043	6.48782680346812
11715518_a_at	5.34480385456734	5.3425860180929	5.38709212422732	5.16921828008769
11715519_a_at	2.62805276688269	2.74452937100105	2.57271802085017	2.83924105824271
11715520_at	5.36459808443963	5.67298382065317	5.3750401150064	5.5872592873482
11715521_a_at	4.52441060098643	4.05875191462398	4.28032431689377	4.07671522495054
11715522_a_at	2.78219728391054	2.79936559911987	2.52686830393416	2.78296856783331
11715523_a_at	6.54856966836242	6.62647516946572	6.52248654092172	6.48062431958138
11715524_a_at	3.73508001960449	3.67866475568747	3.76340440038348	3.48806707619484
11715525_a_at	8.35652420524986	8.63786823712148	8.65881672206452	8.64780670905746
11715526_s_at	7.08228152712838	7.26238463097314	7.18128846653234	7.13959045189016
11715527_x_at	9.59457236171665	9.78268815676654	9.7567851458253	9.90021990474439
11715528_a_at	5.55117969313993	5.6653129810223	5.70691643086794	5.84824487106608
11715529_x_at	6.04105761584676	6.16990850942008	6.20900283895679	6.15241077460928
11715530_a_at	2.74672616295006	2.56336287809255	2.61752924326655	2.41224218488233
11715531_at	6.50360196715115	6.49230479120427	6.47909783427115	6.73029288146611
11715532_a_at	4.5050202103002	4.56793972484575	4.44453411171864	4.40092932849242
11715533_a_at	6.87429787455581	6.79115216689973	6.9322771586499	6.92560897372153
11715534_a_at	6.38368103069872	6.59954734779035	6.61673962670418	6.38870118860169
11715535_a_at	6.17601609669035	6.3593451648279	6.3168108391786	6.37386569530804
11715536_a_at	7.00280575695036	7.00660813781879	6.97335518595999	7.15359656987842
11715537_x_at	6.97153409241448	6.9642498130274	6.84745778109399	7.2162998923276
11715538_s_at	12.4956096510006	12.3790991706508	12.3059051905992	12.4143407991353
11715539_x_at	12.2367637884421	12.203010313559	12.0627967860268	12.1665058529805
11715540_s_at	10.636101561582	10.8788932206177	10.6841999913191	10.9642165898523
11715541_a_at	4.0219024249912	4.00554361696434	4.15075586185336	4.0582560260732
11715542_s_at	4.83704898789826	4.86541219181422	4.74416945435619	4.82683873560063
11715543_x_at	10.7856732541426	10.9535770948235	10.9195998603413	10.6359377356002
11715544_a_at	4.17686129987833	4.20820507074568	4.10172364529128	4.02553117809621
11715545_at	2.52124587185701	2.53906412428356	2.57880792044948	2.75846191908597
11715546_s_at	3.3069556536322	3.08592624978452	3.45274703067571	3.44439230628556
11715547_at	5.10507837303387	4.92468732462318	5.01092087771971	5.16860525538364
11715548_a_at	2.90902612052539	3.01803018009172	3.05320396166177	2.76612189921382
11715549_at	6.79958237406438	6.71380201745985	6.92904772368211	6.66569109215875
11715550_at	5.19306862061287	5.63660151172207	5.19306862061287	5.53913649581622
11715551_s_at	5.48037253818787	5.58967119126541	5.53072748695557	5.60497166014089
11715552_a_at	2.39983492111533	2.36116706494762	2.58351420237667	2.41785816462975
11715553_s_at	6.35849736306334	6.64758152557714	6.39395082276467	6.94673101022699
11715554_a_at	5.32194542447405	5.19780721527155	5.41543263996343	4.94131204530756
11715555_a_at	5.4593906952479	5.39364131103313	5.39364131103313	5.14877582385413
11715556_a_at	7.42825458794415	7.45913796648917	7.47001730187563	7.41912988017206
11715557_at	3.98371410953981	3.70619598910761	3.677621878363	3.57722783887912
11715558_a_at	4.71395121402674	4.60647248854001	4.76019512694207	4.69324921491332
11715559_x_at	2.0918291170574	2.2877949404496	2.21102680914402	2.34068211881473
11715560_s_at	5.78203191682331	5.8255737368532	6.03127379530584	5.68365522253161
11715561_s_at	5.09462674825994	5.13912420787319	5.2028823972659	5.18910043879013
11715562_x_at	3.50764062631945	3.55145475198903	4.13802659293082	3.66870252702334
11715563_s_at	3.84519548053707	3.87266182782932	3.85015644797783	3.57722783887912
11715564_s_at	5.64823837846102	5.82152629494033	5.55582918671539	5.93915469779103
11715565_at	3.61311339489181	3.87049744474515	3.52184653573729	3.84560106312794
11715566_at	4.14039616534298	4.05097852248158	4.16632484427009	4.21982205112795
11715567_at	4.91195586537178	4.9282046936676	4.85995976781159	4.69799267070724
11715568_a_at	2.57583912089636	2.15048938684195	2.38600663723313	2.13730755812259
11715569_at	2.64508601627858	2.67275543383762	2.75213955981771	2.72447014225866
11715570_x_at	2.88084512823912	3.06045516065023	3.08298241299764	2.86655964433489
11715571_a_at	6.01417317580544	5.92261260106656	5.92344388866786	6.00268925745912
11715572_a_at	4.72191317859135	4.87228714779974	4.52288847991971	4.77789707843174
11715573_s_at	3.91030444426029	4.07414293657341	4.01615894662023	3.91545112388557
11715574_a_at	7.88105588303391	8.15989070106824	7.9793178131421	8.17158669001556
11715575_x_at	5.14926679858424	5.28667794995736	5.10866365421845	5.26087266464221
11715576_at	4.19259884049553	4.86088410176094	4.1825301648293	4.75507107575962
11715577_x_at	4.69990448430372	5.14014655421648	4.67943532650432	5.06487072452619
11715578_s_at	5.78969324744393	5.68482273768274	5.69346428983484	5.74024724368886
11715579_a_at	5.96579995717784	5.97300312328294	5.82652758241665	5.78964064929396
11715580_a_at	5.78823208222991	6.1536262657481	6.04437612813112	6.24315830789069
11715581_a_at	6.48239418666637	6.6638567038137	6.69653809622347	6.34871358460032
11715582_s_at	5.61458490857165	5.6551069207884	5.65602533422868	5.97734264879957
11715583_s_at	8.87373192910853	8.94750958605371	9.05589690781536	9.11387285676239
11715584_a_at	3.99877264420659	3.8464083896422	3.99278673521917	3.71089702973924
11715585_a_at	6.93240320772825	7.1255322749855	6.90329536640464	7.05845369136915
11715586_at	4.59267951347818	4.60245259131602	4.6245085703102	4.68471129409024
11715587_at	8.74198977441962	9.00092030863734	8.88922145085332	9.08492117070424
11715588_x_at	7.22730221179945	7.35804806851683	7.53886297556361	7.20853236293697
11715589_at	3.68852357763977	3.6022295717059	3.61905778372843	3.47058470279959
11715590_at	4.78000626540283	4.94778264271033	5.07130556368347	4.85949186900139
11715591_s_at	4.66712354243897	5.33986499412534	4.98170078123296	4.90695669269909
11715592_x_at	5.19067104633252	5.74596490100332	5.67022097053369	5.51997000783859
11715593_s_at	4.89671427446357	4.84812565206484	4.71379041323935	4.87683587561247
11715594_a_at	5.49126106167528	5.63660151172207	5.63569299739679	5.62933339711985
11715595_a_at	6.35841470798349	6.44668433019153	6.25870314641683	6.6238523719052
11715596_at	9.13594927914045	9.50259957706435	9.68181614185622	9.66287172527172
11715597_x_at	8.90237263293967	9.10976187922803	9.29673424707249	9.29701544859005
11715598_at	4.27254613506367	4.10707628511854	4.1020581528881	3.9114671651806
11715599_a_at	6.30255516220485	6.75112980165811	6.29636037675655	6.67191100096022
11715600_a_at	3.93271166142615	4.0782435202253	4.13930670068082	4.02086551865003
11715601_a_at	5.07726760072042	5.36638627078566	5.18408152888957	5.33128219617388
11715602_s_at	4.204999434826	4.3268701774784	4.20344169249412	4.39420641597729
11715603_s_at	4.72037364210313	4.64866567650187	4.67943532650431	4.63840912650105
11715604_x_at	4.88937605083292	4.38316451763137	4.52373771048636	4.69324921491332
11715605_s_at	5.16707081597281	5.15002115627053	5.3750401150064	5.25012163942114
11715606_a_at	4.68932842585108	4.83928116209731	4.50257393920712	4.73225498438672
11715607_at	8.45120771920288	8.89507682079529	8.65428107434866	8.84203798779808
11715608_x_at	8.13843850049619	8.40585991742092	8.40536490298249	8.35956115425843
11715609_a_at	3.94858690932219	3.96439538886482	4.05899357846224	4.3219661947914
11715610_a_at	6.58118818062977	6.76154028844987	6.62292360172847	7.03341393724248
11715611_a_at	3.09220051482534	3.16626532886574	3.11874511358281	2.93490065697963
11715612_s_at	3.85811575152417	3.74147168502567	3.78174436187078	3.88328100400177
11715613_a_at	4.13143418432824	4.26921744932262	4.50958784252141	4.30939803060592
11715614_at	5.01719662766445	5.12611347686346	5.0082754070961	5.21552659844819
11715615_at	2.82589518194582	2.56610340384379	3.00265270277658	2.74160317471243
11715616_a_at	4.84296268550126	4.95464252586426	4.90187724102715	4.92308943506676
11715617_a_at	4.88082919607741	4.66718057585028	4.65244224684364	4.47977095694555
11715618_a_at	4.45714272123459	4.40362708621152	4.54349114059463	4.21845162290333
11715619_x_at	4.75897085702968	4.83059958648946	4.84676006356885	4.85225695636181
11715620_a_at	5.66248312336869	5.80087863384644	5.52112564433495	5.65461302506473
11715621_at	3.12339585826079	3.45915550353228	3.19882272389147	3.02904490754938
11715622_a_at	4.73351528238419	4.69411199695533	4.41291860424179	4.66771685929156
11715623_s_at	2.77159933476005	2.801056612523	2.83051389028594	2.801056612523
11715624_at	2.61448827285886	2.86531858493885	2.67903839169758	2.62666647357375
11715625_a_at	3.93831562336989	3.93831562336989	3.99218779543487	3.83394753181291
11715626_a_at	12.9300473731333	12.9695959457687	12.9315953867691	12.9922749196932
11715627_x_at	7.56613215949692	8.05126612277136	7.74095467058201	8.12070646422636
11715628_a_at	3.06764316182789	2.94877686085511	3.00166403922024	2.87911326114619
11715629_a_at	2.47208282315021	2.20984706150641	2.19952880169289	2.67456854120509
11715630_s_at	2.31463728814983	1.98873094411522	2.06482931971015	2.06962941566795
11715631_x_at	3.55907418082558	3.75481817581715	3.36119928203815	3.62300295525073
11715632_at	7.95331536969877	7.95180309736173	7.86237201369165	7.96342162352743
11715633_x_at	7.2622284784851	7.35538570857668	7.53137504202144	7.53721200795964
11715634_s_at	2.25128074976541	2.81921217378495	2.67752946380132	2.39800646053058
11715635_x_at	3.41247150487105	3.75957263544078	3.59646420576607	3.52894810898941
11715636_a_at	6.3735620545159	6.35746291210577	6.24401145040682	6.32339770022849
11715637_a_at	4.04801497304104	3.79857718140956	3.86915863537433	3.95130425499622
11715638_s_at	3.8902771649356	3.9309019388161	3.9444435301096	3.89164091939559
11715639_a_at	2.96094138371752	2.52073322545721	2.53971329126705	2.88408598652266
11715640_a_at	2.22816392045175	2.38082074768394	2.31729711817738	2.3616238640091
11715641_a_at	3.71503467440798	3.77003410936385	3.92667503764061	3.72803220667583
11715642_s_at	2.71227995010128	2.54798110358189	2.89119662452058	2.99481815812655
11715643_a_at	3.59319529402752	3.59324256152582	3.94398653712454	3.74846611774915
11715644_s_at	2.35154068891374	2.33607820241092	2.37709923650731	2.32421205814219
11715645_s_at	4.38621936648458	4.34765511988401	4.44753184499749	4.38621936648458
11715646_a_at	6.39390549578867	6.44129791231369	6.29523306477645	6.56660212649865
11715647_a_at	7.80814587713787	8.05175153645158	7.79055189147879	8.05175153645158
11715648_x_at	6.39087459436511	6.9971784250132	6.61059060309814	6.87361798628609
11715649_s_at	4.16463377936208	3.70638434319613	3.62217367344498	3.65356365719521
11715650_a_at	3.40476265538579	3.59533271752272	3.11727932545987	3.46367721091168
11715651_s_at	4.28910872439464	4.30631516946303	4.5096051156349	3.97454882307816
11715652_a_at	5.99678076065443	6.20859513943806	6.34407700468429	6.25845633882591
11715653_a_at	2.75946867447252	2.55174116277824	2.71624390245457	2.42144168964332
11715654_x_at	5.42625024854146	5.61700466769272	5.27254028296964	5.64255601825658
11715655_s_at	2.9500799647945	3.00171823394321	2.96395705211423	2.93238294478517
11715656_at	3.90620305366469	4.20399136209567	4.1649903941176	4.22437188222029
11715657_a_at	4.15881532926381	4.08578902398033	4.29618421302154	4.11185945645224
11715658_a_at	5.84907226848269	5.85545510755173	5.90216811037696	5.85545510755173
11715659_s_at	5.19000456511395	4.66363561887799	4.86067271659581	5.16337719504687
11715660_a_at	6.4712784474983	6.549670240902	6.49678306253688	6.67462221629295
11715661_a_at	3.06912503674254	3.01967572584847	2.91251924222502	3.08031935740505
11715662_x_at	3.01930990783663	2.8399629466345	2.69894590842199	2.66134429413229
11715663_a_at	3.61405228553533	3.69068081634883	3.51874984087754	3.60222722899387
11715664_a_at	6.74144633653982	6.86330799786258	7.10090316646179	6.89686776995395
11715665_a_at	4.5832353937047	5.02329791509825	4.71122537566351	4.55260743417267
11715666_a_at	2.74918673105248	2.46265518778633	2.30234967650781	2.45687971545895
11715667_s_at	7.42269664032004	7.44552008474599	7.32582286077166	7.29557815835054
11715668_a_at	10.5077160919809	10.7743537777334	10.7018978521361	10.709057237446
11715669_s_at	6.57104360902546	6.6576366572311	6.58790983950085	6.56604150599095
11715670_a_at	6.09869436857117	6.12249572739029	6.21459579567013	5.97152463136148
11715671_x_at	5.94349418416739	6.13825639402421	6.26545825039987	5.9841599224096
11715672_a_at	5.15002115627053	5.17948132095884	5.179249062043	5.26139242240365
11715673_x_at	6.57627490867633	6.82801741563854	6.574915363158	6.74123758680785
11715674_s_at	2.14470555547892	2.10667315288537	1.99532453025642	1.99532453025642
11715675_a_at	2.57808779434797	2.57997281246425	2.48548606053413	2.55635112448172
11715676_s_at	6.35877750923888	6.3975415702639	6.3975415702639	6.43630563128891
11715677_x_at	6.31552502343505	6.33866487399991	6.12553342317481	6.21099957592122
11715678_s_at	6.06875293361881	6.2466203762499	6.09957481097666	6.31509101593488
11715679_s_at	2.3635500438015	2.43911347062225	2.28397264116013	2.38570395367779
11715680_s_at	6.02788779854655	6.16905816508436	5.87649674108374	6.07685873874344
11715681_s_at	2.30783124934798	2.30783124934798	2.21367375403383	2.57997281246425
11715682_a_at	3.8580971910989	3.73141342457119	3.918413258131	3.98565224930432
11715683_a_at	4.2078426069275	4.44777905009489	4.38797217156148	4.23309573440996
11715684_a_at	5.4455482265879	5.58776440665622	5.46718846190439	5.6718376405976
11715685_s_at	3.4970128026882	3.25979691010602	3.59406924490706	3.40884896175842
11715686_s_at	9.33326036221646	9.43499919891142	9.59296128978562	9.68393151176842
11715687_x_at	5.34023554449565	5.36889793916757	5.62253861721953	5.50639927678475
11715688_x_at	3.93439916635412	3.82814876892557	4.01913649403353	3.69715927757141
11715689_a_at	4.94386616172659	4.9806964117826	4.91867208641847	4.95550233647448
11715690_x_at	3.12912119639811	3.61845216010058	3.29489826585862	3.52804867921748
11715691_s_at	6.46591464460295	6.42774951415906	6.37897259733641	6.55447236820505
11715692_a_at	5.55436202850098	5.46249841991764	5.45119628085021	5.18009323569835
11715693_s_at	4.03629815719539	4.1771735272706	4.04143091895506	4.19320123778458
11715694_at	2.7783716399705	2.96090649840424	2.7783716399705	2.66189503585215
11715695_x_at	3.17095160915291	3.08441997118924	3.17095160915291	3.13478293616774
11715696_a_at	3.30565216205399	3.33330990811867	3.29182328902165	3.07765780591237
11715697_a_at	4.76863134164078	4.65960968208622	4.76863134164078	4.77684573675652
11715698_a_at	6.06911341801723	5.83520554278041	6.12410428780721	6.1841704370332
11715699_s_at	2.33289398235117	2.52173857215172	2.42307068292043	2.62285348195968
11715700_s_at	5.93477522015686	5.76380059950697	5.90367250105494	5.98482896816663
11715701_s_at	8.0024070652262	8.39524182444363	8.08896153476079	8.30304973635029
11715702_at	5.43014193497361	5.59460618927529	5.35648073301899	5.30181579915181
11715703_s_at	3.80865652581596	3.61637877655383	3.576077823959	3.61637877655383
11715704_x_at	5.31167339273399	5.50798869063152	5.49763116571738	5.34986892205954
11715705_a_at	3.16626532886574	3.16923414706183	3.2509105648807	3.16626532886574
11715706_x_at	3.048687834693	3.11455053110482	3.15355748058143	3.35011823860238
11715707_a_at	3.21115655647841	3.16279711970944	2.99347139783353	2.99958043957848
11715708_s_at	4.90570175054402	4.82902794513517	4.84812565206484	4.88435713263592
11715709_x_at	6.03051550023668	5.96754457865076	5.96099830024175	6.01492114449405
11715710_s_at	3.48674073498108	3.37630371296897	3.75639800116387	3.629169330238
11715711_a_at	4.99753993865168	5.06534884405437	4.93045472014069	5.02593507734032
11715712_a_at	2.00692601388141	2.04343584330282	2.15048938684195	2.24086040284031
11715713_a_at	6.39426362130871	6.27446658064993	6.37432815746994	6.15848981910463
11715714_s_at	5.71422306668689	5.85837529321671	5.9943348108511	5.61236560141946
11715715_x_at	4.96902100791246	4.84727839596055	4.93167064599016	4.70789063481437
11715716_at	3.34591635020574	3.32700216653623	3.37668340352418	3.57987087179103
11715717_s_at	3.85723450348749	3.60394700681537	3.91982696123987	3.89164091939559
11715718_a_at	5.90689699436816	6.07940332395331	5.87428659964748	5.90704559463802
11715719_x_at	4.66667391823903	4.76458113328782	4.84711540932121	4.62284446728736
11715720_s_at	2.98982083624244	3.05481901531982	2.92933758258371	2.94251449959006
11715721_a_at	4.43448456653338	4.2054503493837	4.17101632924325	4.1819071759124
11715722_a_at	3.43154947920333	3.62335393642442	3.60911643856212	3.56824793711822
11715723_s_at	2.61197401530327	2.65130502675891	2.54573995166852	2.71314353861895
11715724_s_at	4.50241798011738	4.48260369688944	4.23320356654144	4.39398866953161
11715725_x_at	4.85301992244713	4.66289748294053	4.82020127361478	5.05969691392483
11715726_a_at	4.50447827027255	5.03841976817418	4.8446911537887	5.20982451711169
11715727_s_at	4.58684658365424	4.95631029012671	4.69828577683713	5.03004861859778
11715728_a_at	5.37518693812684	5.18096641297988	5.19170986195174	5.39882163672022
11715729_s_at	3.05533395000248	2.89481127088406	2.84492218119108	2.79541830403088
11715730_at	3.71379836693783	3.75194176248721	3.64924520139888	3.8397298557603
11715731_at	2.64761414805374	2.79376248556701	2.46007487672656	2.56739105229928
11715732_at	7.34534632113822	7.63982594668205	7.52126323915079	7.82703789975185
11715733_a_at	5.43245547246057	4.97657557891742	5.15772309183784	5.01419385171123
11715734_a_at	5.86391446327291	5.95523006795309	6.14011208533617	6.03072408659074
11715735_a_at	2.99068162837049	2.5557155189665	2.50621719390778	2.61141480458746
11715736_s_at	3.5213184056083	3.83542927930699	3.67399804930161	3.7792421124395
11715737_at	5.27718705948355	5.30703462371548	5.37377111232474	5.36633997910146
11715738_s_at	2.87014850072234	2.92010322346275	2.91963444495078	2.84563991786412
11715739_s_at	3.5626722038695	3.64551307297992	3.74143973100797	3.48288434736767
11715740_a_at	7.22881077434809	7.46352030428574	7.47923384053939	7.70120971780853
11715741_at	6.76206438289312	7.01328133453335	6.89498503173795	6.70777307866815
11715742_s_at	10.8785854616914	10.8105752938359	10.7784903039486	10.8735206691911
11715743_x_at	6.24021474163246	6.39083411413745	6.34616228179746	6.06067814257242
11715744_a_at	3.82111768930298	3.59858693603513	3.77914026229198	3.86702307681744
11715745_a_at	3.01448642001396	3.02482542921847	2.75491661195246	2.99112805438651
11715746_a_at	5.6653129810223	5.94812288837276	5.95221568123192	5.97152463136148
11715747_a_at	5.53555593544306	5.4564897447215	5.35427920479058	5.24333514670427
11715748_at	6.89943741870125	6.96170859019556	6.78230780734012	7.01061123355783
11715749_s_at	6.52277616149115	6.52054084098314	6.52948212301517	6.57658946092914
11715750_at	5.14647134273446	4.8912789719628	4.89245937587296	4.82939667590126
11715751_a_at	4.17725566135716	3.98936493302251	4.17725566135716	4.23617360725934
11715752_at	4.05461527147428	4.0723809521604	3.91290944495322	3.70989836918716
11715753_a_at	3.2492784736245	3.43474971701144	3.161336365922	3.14612942154173
11715754_at	5.48185099117823	5.36270270571995	5.56599668474183	5.57705189509115
11715755_a_at	3.57526892466167	3.72193927318365	3.71222031248799	3.63463776306278
11715756_x_at	6.01120884586515	6.14097951087901	5.85842619647124	6.30466541941493
11715757_a_at	3.31652588503263	3.47116978352146	3.14166307501348	3.31652588503263
11715758_at	5.80087863384644	5.70041705563408	5.67844751302139	5.80614240454374
11715759_at	5.94124483242501	5.91256255943132	5.91256255943132	5.8496450715231
11715760_x_at	5.90407137586767	5.71286967892298	5.84875331647604	5.8947978099293
11715761_a_at	7.0488732970448	6.98787191371224	6.8857860146975	6.89643556519644
11715762_s_at	5.33091037943837	5.40938219412027	5.33986499412534	5.36949871268212
11715763_a_at	3.71059515873613	3.66923173421562	3.94761224400994	3.8564581298152
11715764_a_at	5.34278227308789	5.18979013550912	4.99440060796062	5.03083004152624
11715765_a_at	5.90243763893558	6.11855543965007	5.73410367024576	5.8695766188098
11715766_a_at	4.48338555187766	4.41644382469376	4.35707922400934	4.54364253333405
11715767_s_at	2.8744218017253	2.96698191152533	2.86101682205606	2.87202595001364
11715768_x_at	5.2987608458726	4.9752711326562	5.47328409381427	5.18009323569835
11715769_a_at	4.65869595967845	4.91534099751708	4.39475038635984	4.56359528549486
11715770_x_at	10.4845532287709	10.3605653087773	10.3117473807648	10.4121090577687
11715771_a_at	4.51734098933495	4.75756364656692	4.42023724496142	4.58191106806942
11715772_x_at	5.68199040314705	5.88076276147084	5.72170767716961	5.87649674108374
11715773_a_at	6.96537318888174	6.78019034173979	6.74477540657955	6.9382979306514
11715774_s_at	3.16626532886574	3.38426688283101	3.26074947666374	3.50215343676503
11715775_a_at	5.57995694549859	5.55659552762211	5.56222247111535	5.65004119912804
11715776_a_at	5.4250171802579	5.53135911986636	5.60341628046818	5.50902621110017
11715777_s_at	2.66924699356362	2.72773376609197	2.95587446465363	2.80026433927
11715778_a_at	5.56785376668106	5.9943348108511	5.72107684385858	6.09068579944832
11715779_a_at	2.85644825316007	2.57933230816377	3.0252731414138	3.27414104022533
11715780_x_at	2.88544789282917	2.70871895387809	3.08699220334439	3.20203798901933
11715781_a_at	6.33787886310818	6.55276388762063	6.30199691231854	6.35067006480956
11715782_a_at	8.3715204621494	8.75813627521865	8.30483170540775	8.62261620303239
11715783_x_at	5.3266360790907	5.68106900341996	5.3097753669897	5.50181539792881
11715784_s_at	4.11194433337691	3.84670918717209	4.17165757256982	3.92312369430516
11715785_at	6.56064692025295	6.52901808893259	6.60151805356043	6.52294156151611
11715786_at	6.84614349576398	6.99913494378756	7.02235867900792	6.93873485123533
11715787_x_at	6.17884199541806	6.57513798853279	6.4484151344868	6.73766520249336
11715788_a_at	2.2340072690832	2.2643702545096	2.39791347295042	2.43450448480448
11715789_a_at	3.50033611290505	3.93670475928986	3.56874287478055	3.50871719416269
11715790_a_at	4.84333370271555	4.66218618979513	4.64802843749906	4.80266105947991
11715791_at	8.01614056547005	8.164811831196	8.0482709402384	8.1984882061701
11715792_a_at	3.36563875103896	3.42898776193112	3.54239627186971	3.52569852601421
11715793_a_at	2.61315923745393	2.69395840261201	2.51517234865494	2.43195514194065
11715794_x_at	4.99845868347707	4.97792151185344	4.70444993536458	4.96212500397949
11715795_at	3.75280050260628	4.31376388109986	4.18411015349723	4.08637640740733
11715796_s_at	2.07460413509694	2.20727376519025	2.20132698914293	2.09632302166795
11715797_a_at	6.27327850306814	6.20934189846536	6.24054154196138	6.30201400373225
11715798_x_at	5.96287765044126	5.88692838576467	5.9301406893345	5.99488821237177
11715799_s_at	6.03990879919842	6.18471579105528	6.09776760303123	6.02331698292276
11715800_at	5.99115083755325	6.06676842800596	6.1909568050647	5.98996242131836
11715801_s_at	4.58193735290403	5.0399864802436	4.72127300124739	4.64767564331213
11715802_a_at	4.82500503528574	4.82652910213709	4.75397646780153	4.07386519213426
11715803_a_at	5.28750947319091	5.46500589619857	5.19102267222499	5.23976053786707
11715804_s_at	2.7642766581992	2.89939015860593	2.81822552275796	2.64484837179177
11715805_a_at	9.09848123899209	9.06196251938313	9.09202797848445	9.13704710428041
11715806_a_at	4.7162907754102	4.73167687423353	4.46501773754432	4.43968874265859
11715807_a_at	7.47109801279225	7.4754942575309	7.22111987886677	7.52512680850632
11715808_a_at	6.67800486767552	6.771619924984	7.0637601082221	6.81505450579476
11715809_a_at	4.41280803594293	4.47483236130706	4.33403550748248	4.55360488976751
11715810_a_at	6.85308677607595	6.48557643497553	6.97437289915745	7.05163593950522
11715811_s_at	6.15854318248793	6.38369007181821	6.89840033023821	6.48506709716519
11715812_s_at	4.623073224143	4.98357073447934	4.78809725255394	4.78507891133789
11715813_at	2.41492915827839	2.35868008042656	2.42882133184845	2.3830497376876
11715814_a_at	5.87034442775778	6.06655497819521	5.82810509913926	5.80087863384644
11715815_a_at	6.23827873753693	6.23827873753693	6.23306416318749	6.38369007181821
11715816_at	3.71091593489646	3.61672666395046	3.44154019162192	3.56996190302627
11715817_at	6.33017533415947	6.14868911480486	6.20402927754863	6.29818677286278
11715818_at	4.36035105483159	4.2799841084247	4.59907918467455	4.46388587855939
11715819_a_at	6.8272178842032	6.66684219620002	6.74509056763678	6.83047405849996
11715820_a_at	6.31949337913069	6.68888176005365	6.50064089205111	6.531368623498
11715821_a_at	3.53731622935224	3.81428092445433	3.92325934601708	3.64613872918318
11715822_s_at	2.16339138473101	2.16339138473101	2.05633784119188	2.19276270901958
11715823_x_at	2.18095759931567	2.4528237058759	2.31130816341029	2.69688503024496
11715824_at	5.75224496593046	5.95785836052607	5.73697495677655	5.92491625582856
11715825_a_at	8.85781579034622	8.90150169155528	9.09457629930528	8.8255527884503
11715826_x_at	3.17495404116742	3.1187462656754	3.1187462656754	2.95286971033166
11715827_s_at	6.05067671838644	6.09801474828483	6.0861023231641	6.08213151479053
11715828_a_at	5.43162219241218	5.33251201065387	5.64290677554647	5.60802337190276
11715829_at	3.28326815958221	3.09010329738878	3.09337346495128	3.12912205814855
11715830_s_at	2.3635500438015	2.30463548827561	2.43671749468603	2.27453374962393
11715831_s_at	5.94898585870915	5.93211193185232	6.10032133744124	5.75801206312477
11715832_s_at	4.41638689747663	4.28222914602746	4.30562058754322	4.16789005510751
11715833_a_at	3.74319148169521	3.57363245062752	3.65336234264432	3.75745412547223
11715834_x_at	3.84653867126492	3.74409428787876	4.13045855211275	3.89942584963004
11715835_a_at	6.47128979831115	6.56094994062991	6.58127951376025	6.85833532360607
11715836_x_at	6.54537612354552	6.57716891829459	6.59021814727362	6.69323615541383
11715837_a_at	2.79541830403088	2.61297279452679	2.36785996251139	2.66844646494823
11715838_a_at	5.26020136727012	5.06621806092478	5.23851618645524	5.08790324173965
11715839_a_at	4.05440376329345	3.9231579188425	3.61110591248793	3.74918948471427
11715840_s_at	5.92458384892705	6.18042258917972	5.92458384892705	5.8133488057744
11715841_at	5.4594130444611	5.54559975462066	5.51567893693461	5.40029576980184
11715842_a_at	4.76295076969124	5.14674245128917	5.00843105595883	4.9911938574083
11715843_at	3.53731622935224	3.59646420576607	3.42985234022191	4.06179651789886
11715844_s_at	5.248001385542	5.44350518876229	5.50308325098103	5.50777364588864
11715845_s_at	6.4533748881896	6.55890031562904	6.47038142349652	6.47038142349652
11715846_at	2.6471269694275	2.99767461696016	2.75136876283422	2.77899308969926
11715847_x_at	2.63304066663275	2.57412611110686	2.41906417694151	2.65775245642583
11715848_a_at	7.70561951879841	7.96722151389748	7.98041691046641	8.03616908904578
11715849_a_at	4.71094931361282	4.72825806634557	4.99895014950667	4.99349321255039
11715850_x_at	4.25894650336011	3.87266182782932	4.18973270114197	4.1089332921336
11715851_s_at	3.5174328812945	3.76975243452861	3.67123618171131	3.79931216971489
11715852_at	4.36482649894877	4.39640735063576	4.16757771932087	4.3072644503563
11715853_a_at	6.04346830496387	6.3308593915643	6.27785657790156	6.0964711186266
11715854_at	6.22435776954522	6.3995498184324	6.23431672006489	6.16994372110297
11715855_a_at	2.12317745227823	2.22965314499023	2.3939798903955	2.36836475890691
11715856_s_at	4.70982390968438	4.58779125288454	4.60463806177288	4.61292111504141
11715857_a_at	5.49183205950267	5.26056141511531	5.35509893265393	5.89250559279226
11715858_s_at	3.97722730072611	3.75955361452085	3.86523491481769	3.8037749979265
11715859_at	4.66028381319614	4.71472647464792	4.68858776066871	4.68858776066871
11715860_a_at	4.86409960426008	4.76816049722441	4.9289751635876	4.86409960426008
11715861_a_at	7.52322173470945	7.3733197284266	7.49868062980209	7.60520550857106
11715862_x_at	3.84326127055205	3.87221296305015	3.9065802927417	3.68264096116549
11715863_x_at	5.59243371541257	5.70041705563408	5.65899574720123	5.54755151510076
11715864_a_at	3.38132040630647	3.05227314299236	3.36192392306604	3.13353697383228
11715865_a_at	6.54488306234632	6.47572008911919	6.69411793829226	6.44930034543274
11715866_x_at	6.39701982821795	6.54366472682482	6.62079210860633	6.39602435825735
11715867_x_at	4.39872077233019	4.36107815589922	4.48932269327833	4.27847338846562
11715868_a_at	6.05992123677355	6.04413356067947	5.87504642104042	5.94641411158883
11715869_x_at	6.45562030961471	6.3720708913096	6.22880285815701	6.27610908365856
11715870_a_at	3.41678486477803	3.40195470387336	3.56207765660436	3.62268480133923
11715871_a_at	2.81475268107428	2.64558559068812	2.69827607695592	2.69277989214678
11715872_at	7.22598515561044	7.2284478472824	7.15750503546228	7.26133151755713
11715873_a_at	4.11346749452807	3.89079214765555	4.19372719569146	3.90092348640251
11715874_s_at	2.99474568608162	3.21604634501969	3.37535901169664	3.03210357572908
11715875_a_at	5.15293944138867	5.44843829696136	5.4625268385563	5.11777068287733
11715876_at	4.25466317258306	4.3586350271581	4.3897762248803	4.01464086088374
11715877_s_at	3.9751442062044	3.93614964082389	3.59724387523293	3.92953520888615
11715878_a_at	5.09539868303123	4.80027976503769	4.86323320409797	4.78785509699605
11715879_a_at	5.81774050494533	5.76148095349957	5.57977974642451	5.7270201188242
11715880_a_at	5.248001385542	4.88830283651012	5.07726760072042	5.17592069949456
11715881_a_at	4.82454078871674	5.08377110197088	4.75379593313248	4.79804638523228
11715882_s_at	3.24499628311063	3.42713848389016	3.09789289399432	3.38542746698773
11715883_x_at	6.59389984354736	6.50554352750439	6.50690520719381	6.46715524556521
11715884_a_at	5.48222266926131	5.60991894158915	5.51419793569079	5.49175185789117
11715885_at	4.47024253699644	4.6314435458852	4.51865993354857	4.4836599632917
11715886_at	4.52608862293869	4.51855641379803	4.37760672218448	4.50772278767753
11715887_s_at	4.83978002812517	4.78954995525709	4.81402346878976	4.81402346878976
11715888_s_at	5.19101341424081	5.29623557333155	5.15871722932978	5.33986499412534
11715889_a_at	3.32393441337184	3.40403593118307	3.36128853042262	3.25731667584758
11715890_x_at	3.42713848389016	3.70649691750498	3.53099714663634	3.61327973612997
11715891_at	3.10907131203819	3.22287392046462	3.23410926080785	3.51012955117005
11715892_a_at	2.99032183694717	2.88968850903062	2.63514672221646	2.61315473767468
11715893_s_at	4.66159434624738	4.76708549804722	4.64025685232583	4.88360490976939
11715894_x_at	3.07112787421118	3.53121278320903	3.65468996065984	3.43690201420799
11715895_at	2.06540104872947	2.37342896887221	2.18504531647937	2.2426727574503
11715896_s_at	3.23991219122404	3.15899911098678	3.31623042067152	3.25212973755512
11715897_at	3.04007520386001	3.21939362021098	3.16778413523628	3.25135978699429
11715898_a_at	5.80645984331215	5.9321622922944	6.01830101877137	5.79279685373242
11715899_a_at	2.65436575195471	2.27156562014239	2.63781688558816	2.42391564527619
11715900_a_at	5.45671039869528	5.64988094958641	5.65962454935461	5.63249869898573
11715901_a_at	2.028453807247	2.16495224327479	2.22076797676266	2.43439641553915
11715902_a_at	6.35466611101502	6.19945370547257	6.40250071764459	6.30193123985487
11715903_at	11.501475118061	10.8898874039831	11.2864616591759	11.414365231394
11715904_s_at	7.91288440917213	7.56442084199334	8.01693776325382	7.92978455136557
11715905_x_at	8.46782334308147	8.03757505579276	8.44608198876473	8.64318189522392
11715906_a_at	6.31392327644372	6.79097269694006	6.68508295273906	6.80097765946508
11715907_s_at	5.99173715467301	6.05932761802693	6.02144279411444	6.08249818787245
11715908_at	3.66058723552211	3.35731968672374	3.31452691278582	3.445921479223
11715909_s_at	2.10661444178127	2.29434406816228	2.38263473214348	2.31947393031915
11715910_a_at	4.28344755770952	4.53194570164578	4.48211403049862	4.40163319567518
11715911_at	2.55212419485979	2.71081600754763	2.69855544108291	2.25522228389378
11715912_at	4.97916514568394	4.84500739423478	5.08200346054356	4.92634561823235
11715913_s_at	5.53803238067451	5.31433605518102	5.23264376347459	5.34304752448125
11715914_at	5.39207066494141	5.57710429521192	5.33047277407745	5.48010681816514
11715915_a_at	3.79770170457891	3.65860432846624	3.68178095681712	3.50065450154056
11715916_a_at	2.40823803311143	2.51034172676077	2.45349113499322	2.49712072267566
11715917_a_at	2.0466322301331	2.13722054497414	2.0466322301331	1.95761051256302
11715918_s_at	5.72185465516155	5.58273371317246	5.56426766862344	5.60913320699516
11715919_a_at	3.50118338576471	3.42222740167216	3.22865596087956	3.69797970277042
11715920_a_at	6.42934971812691	6.62041952443941	6.50294814958655	6.39895009537997
11715921_a_at	5.08455855225218	5.09086406354065	5.07905438747536	4.99342617934206
11715922_x_at	3.84308732904715	4.06528195399204	3.87540524020926	3.68298918524481
11715923_a_at	5.27734918408595	5.05822611681674	5.00531461868427	5.08208274998985
11715924_a_at	2.47270846560214	2.28072643075619	2.32991445991171	2.64484837179177
11715925_a_at	2.28741182817703	2.26087380168017	2.18335198995072	2.34288549859847
11715926_s_at	7.91605468835819	7.9768704269013	7.89469141354325	7.97325076866575
11715927_x_at	6.06116168548564	6.21131263669792	6.16930507575607	6.30732516041385
11715928_a_at	6.87163628504021	6.84141583326717	7.11323807599821	7.05768231499817
11715929_x_at	5.92704410438815	6.08965646875612	6.25371906063408	5.94834800301061
11715930_at	4.99097894926346	5.16353164476133	5.06758283179751	5.19216112081347
11715931_s_at	5.85383971382698	5.87509744012298	6.10056816343498	6.19948414940865
11715932_s_at	2.72773376609197	2.39668870540469	2.76916783697221	2.4685104755892
11715933_a_at	5.27803259786676	5.24076502129777	5.19803956206946	5.54247063974049
11715934_s_at	6.19904657081231	6.08451266258912	6.25710658829083	6.08201920769444
11715935_a_at	6.04036777375178	6.10379334517406	6.31469909782589	6.10753209093021
11715936_x_at	4.95178237883702	4.93213680094068	4.71487521632893	4.9511512304257
11715937_a_at	2.4279238650998	2.50098669645486	2.40850172475972	2.25913525108434
11715938_x_at	6.5797805579902	7.03228751205902	6.88593963401699	6.81377196976972
11715939_a_at	4.47843168522191	4.72037364210313	4.89671427446357	4.52373771048635
11715940_s_at	9.15608720746843	9.36517769823835	9.31529717046026	9.36701221618296
11715941_s_at	5.08183161569569	5.12946495682413	5.39203271334038	5.18591737949597
11715942_a_at	3.26463648899135	3.31133455007392	3.36342217583658	2.8954677988436
11715943_x_at	6.96149824315475	7.31697809846164	7.10615106935993	7.47446631375692
11715944_at	3.18029661514668	3.35360861072925	3.08777777622789	3.08162418413446
11715945_a_at	3.34060913511	3.38950472914647	3.36819477958032	3.19961031649692
11715946_a_at	5.35383175452445	5.21035997009998	5.38254362310889	4.82509884333909
11715947_a_at	3.55087233006831	3.61745236988175	3.56691858292606	3.55145609642323
11715948_at	2.2366072242372	2.47917113172408	2.34146472282872	2.53808568724997
11715949_s_at	2.44292276677905	2.46803876812573	2.52351243854717	2.52548724080797
11715950_a_at	3.95287519756466	3.71909879997955	3.87266182782932	3.79931216971489
11715951_s_at	2.57200182990739	2.88861909660293	2.84164729267008	2.68967778076524
11715952_a_at	3.94974734018827	4.05298151452235	3.94974734018827	4.01536373523921
11715953_a_at	2.87883522632979	2.67192294388389	2.59485258069219	2.69814825100397
11715954_a_at	5.37081403997917	5.65227202367033	5.71185008588907	5.5654389176862
11715955_a_at	3.81445026847243	3.49995703169647	3.49003739689288	3.74205744565958
11715956_s_at	2.77149235049839	2.62641500011172	2.59853636237323	2.67281991948617
11715957_s_at	2.71830993722395	2.88973311590621	2.55779435313938	2.88629946134507
11715958_s_at	5.00078209318465	5.10649301708788	4.81319011585226	5.63911759987456
11715959_a_at	6.9977991491577	7.02143263925567	7.12669597608178	7.14325305984962
11715960_x_at	4.92933070835202	5.05500115977917	5.18043272523246	5.09887972446425
11715961_a_at	3.34817271294329	3.34769367635853	3.31889230176722	3.43301577719665
11715962_at	3.30851181823266	3.477904650757	3.21597544213056	3.34946975161654
11715963_a_at	2.78745910414592	2.80147848614546	3.15358803152882	2.82973180103554
11715964_x_at	4.51743964620791	4.4156076047752	4.62295276132298	4.4111390666409
11715965_at	4.75024268887244	4.63109121914909	4.82246552644919	4.48381289762991
11715966_s_at	4.27656641819557	4.20820507074568	4.38599984784359	4.34171579254986
11715967_a_at	8.00437475671147	8.22728138898009	8.21303088322528	8.32468886975184
11715968_s_at	6.4332928142221	6.91376976485631	6.83254942770547	6.90361722271246
11715969_a_at	4.03896385085465	4.12544427875143	4.17028075603197	4.18522624845881
11715970_a_at	4.10442514562143	3.89549065411784	3.95440520964373	3.64607433281983
11715971_a_at	3.33303260782517	3.63984866810143	3.65625826178594	3.59625931283002
11715972_at	2.92671558003121	3.23226211978934	2.89750344243794	3.16626532886574
11715973_a_at	6.23816110774542	6.74012071061374	6.29470572750858	6.67435238851381
11715974_x_at	4.47905766186644	4.52373771048636	4.36987148635503	4.38621936648458
11715975_a_at	4.41106208028916	4.51597025314289	4.25295077926362	4.4176871380066
11715976_a_at	3.93511370920581	4.05313889871584	4.13303767170197	4.01932712534804
11715977_a_at	4.90931760376476	4.93416507827508	5.18913506314047	5.10616277352827
11715978_a_at	2.85155639514132	2.62491457468797	2.96322184483376	2.72479596606432
11715979_x_at	2.64762192326864	2.40008835253034	2.32300265004522	2.31156411651398
11715980_at	5.69000149126587	5.7509448301595	5.52606826465754	5.70988993950225
11715981_a_at	3.74682596815708	4.07119168912626	3.96197688984533	4.43537541141673
11715982_a_at	6.77126269194991	6.81383957475686	6.94802397367714	6.89183186663749
11715983_a_at	5.03403670697686	4.87417866307797	5.02234556258922	5.06702922425299
11715984_s_at	5.2838601274602	4.93992464272398	5.04133145229948	5.0230785524424
11715985_x_at	3.27695270791594	3.29398605043045	3.1310726495267	3.15882884846597
11715986_s_at	3.12755908346815	3.40916110590596	3.64364332010795	2.9414942268011
11715987_a_at	3.06521410761169	3.12300147398067	3.31366539137189	3.48068694274948
11715988_x_at	6.53692634813136	6.58118818062977	6.85439183020437	6.78789181347891
11715989_a_at	5.15948740028437	5.26957968425516	5.20425704914932	5.24694816387847
11715990_s_at	6.10125446944438	6.09749317063441	6.0155650894686	6.12261863300773
11715991_a_at	4.43264423515072	4.05841816882396	4.10402941710108	4.0925162867037
11715992_s_at	5.44381555058508	5.33986499412534	5.57566795362559	5.40233584712587
11715993_s_at	6.22434168530397	6.1349822691717	5.94480090483596	5.77782178486555
11715994_x_at	2.37211139640925	2.35207738949212	2.22395444244922	2.56965400168931
11715995_at	6.33378662440525	6.6291399165602	6.58958171168023	6.41293676744309
11715996_a_at	6.98716405563487	6.62629590629814	6.88090741093642	6.69142867973085
11715997_a_at	3.7624342459661	3.77120078438596	3.63857274424617	3.99302032574806
11715998_s_at	4.22475143899922	4.21100825526845	4.1869377143143	4.23571463113695
11715999_a_at	3.26218313782712	3.24951755855051	2.89252621759029	3.24951755855051
11716000_a_at	2.77415307867184	3.06277716245214	2.5523878208573	2.87073713151302
11716001_at	5.2081989331265	5.47254507008029	5.07726760072042	5.33986499412534
11716002_at	5.39235944459485	5.52965368747891	5.44681281836849	5.4150471460877
11716003_a_at	2.19890801174961	2.51902221224829	2.24707343968314	2.64484837179177
11716004_at	4.7064388831048	5.19297106018303	5.14538969171694	5.19142489560866
11716005_a_at	4.66847676717824	4.37324170775275	4.5412313995423	4.44722305671011
11716006_a_at	3.68555218466721	3.97068461550527	4.04317092739099	3.82772300115028
11716007_a_at	8.45024212032731	8.43819292896336	8.44271124777069	8.67407901124679
11716008_x_at	7.80764461065971	7.55388938826115	7.77000199422874	7.90309859761988
11716009_a_at	4.94386616172659	5.03347499840271	4.87455412716314	4.98759279884984
11716010_s_at	6.04020466023875	5.75230015124425	5.94295155765092	6.05854815837988
11716011_a_at	6.36297040132601	6.40751924848786	6.41702947457588	6.4999350420803
11716012_at	3.93823056011179	3.7973637979666	3.74858688114396	3.89537923635739
11716013_s_at	8.463266211795	8.92562102723925	8.72169717796378	8.99356279071334
11716014_a_at	2.93356058968316	2.804707152821	2.75735267886071	2.84156334861186
11716015_a_at	3.56674048187184	3.3871842252794	3.70825264088548	3.71157216685788
11716016_at	3.56170127930357	3.25080660517619	3.47025465526866	3.52158253212203
11716017_at	2.24707343968314	2.09632302166795	2.1422492390006	2.0296932222793
11716018_s_at	2.52810569405215	2.47726313619791	2.38746622679878	2.40991545414856
11716019_at	3.04137736739108	3.17761592281426	3.06314260024161	3.13206996152009
11716020_s_at	3.20579566242289	2.92557286783433	3.06592565913744	2.89463625491803
11716021_x_at	5.248001385542	5.15753041645438	5.20955142705955	5.13984021082655
11716022_at	5.0121017813017	5.01562065478006	5.21053294591619	4.90507591069066
11716023_s_at	6.86204830372083	6.9104297266446	6.86463013120838	6.8379167468009
11716024_a_at	6.26001007495086	6.56088059596712	6.51047265235289	6.56088059596712
11716025_a_at	4.37545301177749	4.91331444744536	4.72644200725655	4.6643562702481
11716026_s_at	2.57997281246425	2.51400352889305	2.52672267697953	2.42919213819509
11716027_at	2.20596305726339	2.4002238777716	2.33395154053891	2.50098669645486
11716028_x_at	2.27083247967123	2.3283945282637	2.25850812080059	2.47558813479056
11716029_a_at	5.05306917242462	5.31259062667309	4.99510482843881	5.34726490319365
11716030_x_at	5.32253374435089	5.35256365707215	5.25171788011409	5.28834981588118
11716031_s_at	4.27455391679215	4.19357955435113	4.03821856032385	4.05298151452235
11716032_s_at	7.14088497595669	7.21916055118571	7.17226843558192	7.185558462678
11716033_at	5.43856946081724	5.67305714495298	5.43154804442885	5.32981483723207
11716034_a_at	2.10644688855064	2.30463548827561	2.42801633346364	2.3635500438015
11716035_at	3.89176059321459	4.20782160120845	4.19721762844013	3.93554109512019
11716036_x_at	2.99801410214819	2.99282250553478	3.30690142956818	2.97400205678707
11716037_x_at	5.69873703456127	5.66414863320416	5.81449272335763	5.70218336168303
11716038_s_at	5.28362583931874	5.40152231568592	5.49762575021069	5.12855664428382
11716039_a_at	5.39798046834274	5.38371376287161	5.32477005856177	5.20266836923316
11716040_a_at	5.98162433592003	6.20348705161717	6.00206140549915	6.01103483717587
11716041_a_at	2.91254939066823	2.63688180148583	2.77462039052549	2.55490250688656
11716042_x_at	3.05325049010643	3.15411982271822	2.77633616057553	3.11912660952983
11716043_a_at	4.57144027057939	4.50653547612086	4.57801813374286	4.55170668108901
11716044_a_at	6.34881729982628	6.5231008286186	6.27306997450611	6.38471692794987
11716045_s_at	2.54334884402882	2.46968562192226	2.49120458938983	2.50670522531056
11716046_a_at	4.97231688551453	5.06767804837369	5.14282007486284	4.95133336839567
11716047_a_at	4.60055489194566	4.63522777443861	4.53178499296836	4.45287634026586
11716048_at	3.83736246304123	4.15071326790935	3.95764780549493	3.88915187119369
11716049_a_at	4.08890007253973	4.46978605945031	4.07380910838729	4.49878511411154
11716050_at	4.60216892883029	4.61699437236223	4.39686002876686	4.49572895860238
11716051_at	3.19609934381894	3.06000630912918	2.89939015860593	2.97666854214792
11716052_s_at	6.05182478922517	5.87758898673263	5.8328639984373	6.01319930307647
11716053_a_at	3.42957862655093	3.52399160570507	3.46858272112329	3.54586215855818
11716054_at	4.71878341853788	4.33082159969789	4.45419768983051	4.60834379126417
11716055_s_at	2.11749635494978	1.95191013672347	1.82096356333175	1.90306407536879
11716056_a_at	4.7361905984348	4.97345932294296	4.80966641992186	4.80412289877455
11716057_a_at	3.08649524348487	3.10441958638486	3.10441958638486	3.49234208540363
11716058_a_at	6.79724718030916	6.99024617746314	6.88202088733826	6.98001130432332
11716059_x_at	6.77806631018808	6.94250485149466	6.88873322845071	6.9210845153957
11716060_at	10.4685461479753	10.2681189541326	10.3393462556591	10.4932493593952
11716061_a_at	3.09985911417658	3.14896101670049	3.0000003481349	3.01249353584815
11716062_a_at	3.4199860750186	3.40446704955313	3.54278958445365	3.5635483613057
11716063_at	3.17419764806296	3.31163430071632	2.89939015860593	3.11528309253707
11716064_a_at	4.26956381510716	4.65222090609496	4.53475664898106	4.10751356157299
11716065_at	5.55948067379557	5.19979898251012	5.45119628085021	5.08398503682406
11716066_x_at	5.27788264265224	4.93664713759932	5.21393746695898	4.79030532871002
11716067_at	5.83259605826132	5.89889208703049	5.92639785564614	6.07376198601404
11716068_a_at	5.77164353752633	5.76816259460641	5.78309560170604	5.73193308756613
11716069_at	3.33983075771392	3.17298620840732	3.02730231278873	3.16664999788582
11716070_a_at	4.81423397089562	4.87316185036213	4.80711132752755	4.70718042735649
11716071_s_at	3.01318929478852	3.32070216241165	3.0440018889294	3.20710665273305
11716072_s_at	4.15083308851453	4.14832118807144	4.09418997655718	4.21671386360364
11716073_a_at	3.87962718271224	3.99978167626929	3.68102089284334	3.96172780352912
11716074_x_at	2.31456541246918	2.42380666367385	2.21252208053956	2.2986553652618
11716075_a_at	7.90019449502481	7.97108858278752	7.98413139752394	8.25082347336075
11716076_at	2.23897706662902	2.19969374675014	2.39766887931686	2.6381484117028
11716077_x_at	6.09509205380479	5.92559838007637	6.12419332187025	6.4398987395296
11716078_a_at	2.82764476672241	3.11519285837098	2.88520681531488	2.74138210435147
11716079_a_at	5.33986499412534	5.51972735163332	5.35794925022206	5.34894741667096
11716080_a_at	4.88950440841305	4.81210912452175	4.83208328235061	4.6421381543275
11716081_a_at	6.92447204490332	6.80494140270496	6.73130785527438	6.63661268663589
11716082_s_at	2.50289976174742	2.6372430991588	2.62876123953994	2.60331566068337
11716083_a_at	9.55552661001545	9.72486674127438	9.76896602997088	9.90413485971256
11716084_at	8.69272527318827	8.48776176939465	8.68586110534852	8.79577369268406
11716085_at	7.71206564671761	7.5718115354417	7.50582593920671	7.06951307957662
11716086_a_at	5.32194542447405	5.10052566169345	5.19269342838405	5.2175640264243
11716087_s_at	3.91030444426029	4.07172550066219	4.06127660065335	4.20820507074568
11716088_s_at	5.01761098834162	5.06812815099166	5.18087454433784	5.06662342502256
11716089_x_at	4.40109464770049	4.525193968443	4.69890315511677	4.39969329183443
11716090_a_at	3.22860274404992	3.2047860734857	3.18096940292148	3.2047860734857
11716091_x_at	4.51755722361649	4.60499399326271	4.62095220155421	4.501599015325
11716092_x_at	2.37403400378896	2.44380467538483	2.34964718007067	2.43159605238143
11716093_a_at	3.67123618171131	3.3609760334935	3.43996214950289	3.26837702353084
11716094_a_at	5.26219560253604	5.13524749680534	5.18521665547243	4.93792319708308
11716095_s_at	4.52373771048636	4.44824369184871	4.52236309797409	4.54503077553669
11716096_a_at	5.66808977902921	5.32671840616005	5.53055312573517	5.28626994997661
11716097_a_at	8.73025966397659	7.83235254383347	8.49444023528861	8.92268045482374
11716098_a_at	6.02764065655658	5.32498238243127	5.74723492887068	6.0751852113604
11716099_s_at	3.04500182032466	2.95457748433793	2.98830950317453	3.18196646107895
11716100_a_at	2.97829129995371	2.56575563588823	2.7782174905544	2.86707101691542
11716101_s_at	2.89112441291776	2.51959295237945	2.79454036007657	2.98244287616971
11716102_x_at	2.71718564236541	2.77127163077768	2.77258491061744	2.75873509355443
11716103_a_at	2.91035673998824	3.03493108889666	2.93962759066553	3.04867427262743
11716104_a_at	4.9670239445507	4.95550233647448	4.97640885301208	4.94216211834897
11716105_a_at	5.13213325292583	5.16165145682611	5.07931354970984	5.22879540650959
11716106_x_at	3.78723974231509	4.14435770736722	4.11170359772621	4.22563940336031
11716107_a_at	7.21776081148273	7.27349058272476	7.2149383305073	7.25955415202142
11716108_a_at	5.73875707148356	5.95517984014631	5.80881704367632	5.95920816173733
11716109_a_at	3.23492255471989	2.96963233047289	3.1471608243304	3.14640938704894
11716110_s_at	4.83713565859873	5.14692238411479	4.94475272864506	4.89419051472817
11716111_x_at	3.70226136950796	3.50126383389736	3.64396532625503	3.29033169688484
11716112_at	4.84053458517744	4.57379804060252	4.46475787456469	4.51285477774724
11716113_a_at	3.79478529242538	3.85746628582401	3.96903804490506	3.74805401792234
11716114_x_at	6.00507627174129	5.80922244978503	5.91472749773411	5.77403026171753
11716115_s_at	5.28544237840318	5.16698632486573	5.29664163453643	5.15039086491669
11716116_at	5.23247324420934	5.50176249367625	5.42236838866034	5.6653129810223
11716117_at	5.80536409949974	5.88245858558966	5.6585784388634	5.57366306330958
11716118_a_at	2.51644918295768	2.38487648900097	2.49062685329047	2.66617481699124
11716119_x_at	6.20293531249872	5.96315178240724	6.13924523888018	6.08386258928096
11716120_a_at	5.64606418741583	5.79551232174092	5.74423675920715	5.6780092328566
11716121_s_at	3.46148525877299	3.45452795348653	3.42372407694402	3.19991899628848
11716122_s_at	5.03583282202503	5.16550660454269	5.10845809898207	5.33331383297714
11716123_a_at	5.60214826944065	5.81341293106421	5.69741760346183	5.94907023873932
11716124_a_at	5.68307905353362	5.68719155741976	5.60343312688568	5.60907473027445
11716125_a_at	5.82927881946075	6.04556681883924	6.10830321582505	6.07609362279514
11716126_x_at	6.26636566868126	6.29919293997311	6.31894617641615	6.4076960083043
11716127_a_at	2.04343584330282	2.43015621531619	2.30551471542793	2.43911347062225
11716128_at	4.14557386314503	4.16388572247565	4.20569006287415	4.14810653797448
11716129_at	3.2217749867628	3.13546156331011	3.40991412207266	3.2405191356704
11716130_a_at	2.58984081987499	2.86961890153257	3.24871024283805	3.16626532886574
11716131_s_at	4.03564050129081	4.2134171751363	4.14108824513011	3.97211436106317
11716132_a_at	6.49865519860536	6.54244518976846	6.43565816614379	6.56239530336036
11716133_a_at	5.24595074169748	5.30251441349589	5.26306163583195	5.33096578006218
11716134_a_at	3.84894208388818	3.87362374331368	3.94760997311947	3.61047281488214
11716135_a_at	5.18281834311408	5.41713432425785	5.16680369564968	5.4046172332913
11716136_s_at	2.51272810010459	2.30254932696942	2.22347803209804	2.36822858873057
11716137_a_at	3.29487477342967	3.37450596202362	3.17059770903868	3.28875887153813
11716138_a_at	2.21339439683288	2.33819055684562	2.2776986303599	2.27467856976577
11716139_s_at	3.74265477564658	3.72808917100011	4.41083528926751	4.04018285205048
11716140_x_at	5.3075466271506	5.22214739178279	5.57985622045865	5.53913649581622
11716141_a_at	4.92109878162821	4.78358043762644	4.52373771048636	4.60151223007737
11716142_x_at	5.76193755376218	5.97735661942717	5.82402284574933	5.78913797428768
11716143_a_at	5.97066720934726	6.33270380985861	6.6731459495211	6.58699709197206
11716144_a_at	5.78051415923271	5.78051415923271	5.76386107756766	5.79716724089775
11716145_a_at	5.3154580869237	5.38779174597672	5.2383117090552	5.38697569369917
11716146_x_at	4.27174971704775	4.58640580429577	4.30634793247113	4.46214882510938
11716147_s_at	5.05175476889239	4.93435236122187	5.00024054458847	4.85109652794627
11716148_a_at	5.8891642901579	5.68744321524542	5.97090214101709	5.77197587505879
11716149_a_at	3.88310856348843	3.98517375985098	3.92639060324086	3.93074190461688
11716150_a_at	3.341900530271	3.55594908708706	3.32107121567202	3.57722783887912
11716151_a_at	2.938729919606	2.81262474909927	2.94883912594769	2.73510204217432
11716152_s_at	5.72165939738026	5.39053027953753	5.46546593204543	5.55798841039897
11716153_a_at	6.03223042116556	6.22830985546386	6.10327053677177	6.42823641448241
11716154_x_at	7.84045701026007	7.71958402433267	7.63761939972689	7.70153140259476
11716155_s_at	4.93131075878104	5.01089954370938	5.09806351166134	5.10122437634184
11716156_a_at	3.36225114495148	3.52840913221	3.52840913221	3.42713848389016
11716157_at	7.8322843007057	8.06469549619746	7.86208820261052	7.93452396782198
11716158_a_at	9.17181803088729	9.23680709321528	9.07331356321863	9.10781264364843
11716159_a_at	4.11798865028566	4.42686558870311	4.32292145502906	4.21353040128323
11716160_at	4.06691613216316	4.19044972900685	3.82223830840953	3.86278585711273
11716161_s_at	4.3650657350748	4.33159994881294	4.35629973620405	4.22505212396499
11716162_at	4.37857616968749	4.39400349402933	3.99296875828685	4.13063502863227
11716163_s_at	3.44323877129115	3.48263269959519	3.35894370230945	3.40821990225523
11716164_x_at	3.85723450348749	3.79028562797776	3.80469739296967	3.85506450986352
11716165_a_at	3.94707798555286	3.87593560876904	3.85731516091559	3.87593560876904
11716166_x_at	4.96431162146142	4.91740738712806	5.13691188425396	5.20876486537812
11716167_a_at	3.47764623935268	3.46123204643819	3.51148020048739	3.20384799658485
11716168_s_at	2.70778708037408	2.86537406691219	2.72834227158395	2.72834227158395
11716169_at	2.24357448340631	2.32090686799546	2.31786784723277	2.25059896196985
11716170_at	3.03890332375544	3.29628737360878	3.31854531101617	3.10169853411083
11716171_s_at	5.39667255014763	5.4813809601093	5.40292128003985	5.45316908473127
11716172_at	3.42148151300678	3.45962528858448	3.45571675212306	3.47014390192201
11716173_a_at	3.38576279733359	3.43613244403099	3.28441398966349	3.13380104494791
11716174_s_at	4.15712905847391	4.13528472057955	4.14550761010641	4.12366327221205
11716175_x_at	4.84645014036727	4.65896728588041	5.04866053808496	4.95803293371416
11716176_s_at	3.36029251120257	3.10994372423063	3.12025752083946	3.11252217338284
11716177_a_at	3.70958030743363	3.74115416304437	3.83630316147962	3.82155117859948
11716178_s_at	4.08051442469489	4.24277295214607	3.66552857289605	3.87477952352537
11716179_at	4.10667281086897	4.01192386438841	3.96611525189334	3.85261001322772
11716180_at	6.36174841314506	6.30729771303782	6.28666382824778	6.31707878840962
11716181_x_at	5.73359980065061	5.78583687088084	5.7145953267172	5.86574757921766
11716182_s_at	2.47444610354227	2.21706205368893	2.17598517202694	2.37812415787338
11716183_a_at	2.05453938379608	2.47728126499978	2.28643546814989	2.58433480853891
11716184_s_at	2.74308561553988	2.88307181771105	2.8320472877569	2.69954393680388
11716185_a_at	2.91053293128153	3.0407004876153	3.11304104946647	2.91053293128153
11716186_s_at	3.17091943677489	3.21493125544563	3.15299483638227	3.41958043413884
11716187_a_at	3.94994515204963	3.8383740977364	3.69815766442353	4.13280570531242
11716188_s_at	4.06876329174628	4.04324932783046	4.07491560507224	4.23878329526834
11716189_x_at	3.29229708013405	3.13582055929486	3.29027445330578	3.23379483654835
11716190_a_at	5.60560915674673	5.63488716662273	5.6155354091919	5.44072369999994
11716191_at	2.91955718428388	2.80856490973847	2.77799582888871	2.90635051134856
11716192_a_at	3.0717058663669	3.05416394239763	3.20950904479446	3.1243316382747
11716193_s_at	4.88771782180775	4.15740719032809	4.58452568448374	4.82986844313495
11716194_a_at	2.90274895113444	2.68629106894187	2.68629106894187	2.7111383404737
11716195_a_at	6.34378076283966	6.36116400402611	6.20084635070286	6.42339244229681
11716196_x_at	5.81308401364174	5.49651047341399	5.37871928652361	5.65198302621587
11716197_a_at	4.76410362994305	4.93188000725055	4.81990884459913	5.16125223235776
11716198_a_at	2.63129189868399	2.80698835697509	2.81034066463498	2.70823934126068
11716199_x_at	2.66925181461409	2.66925181461409	2.66925181461409	2.66925181461409
11716200_s_at	2.12773838655864	2.18393540290248	1.94168769734464	2.53630970235493
11716201_x_at	4.97259048092251	5.17582566326063	5.03455788333699	4.92681540081704
11716202_a_at	4.0505015516398	4.124213995363	4.23927374647502	4.28057511058147
11716203_a_at	2.25231574077446	2.50590644765964	2.50903202054101	2.90536653841212
11716204_a_at	5.55432469230311	5.5662977025783	5.30881999559901	5.50053528130304
11716205_a_at	4.84812565206484	4.99911303444433	4.80892033152725	5.04503568504227
11716206_a_at	3.6160429150574	3.22266701363697	3.38826139173034	3.84500151967605
11716207_s_at	5.67919520237018	6.07811204103949	5.79967722519324	5.96568897549734
11716208_s_at	2.08514162807162	2.30463548827561	2.15364524521383	2.18008883439639
11716209_a_at	6.07009219294161	6.4673465647222	6.32909579402846	6.3405588222362
11716210_at	9.45285028330747	9.1834107215338	9.10459659658018	9.44216225852628
11716211_a_at	5.0608408948689	4.94026982199275	4.75284292072661	5.12290334059097
11716212_a_at	3.14493299068182	2.92085321975872	2.93782174410034	3.13760282199916
11716213_a_at	5.61563403094633	5.94853340372744	6.0270949908491	5.71152257821664
11716214_a_at	5.14151479068811	5.26518964595966	5.2253822195603	5.4620730525371
11716215_at	5.43381034856862	5.4211388315043	5.35542758069345	5.46156676125543
11716216_at	4.72012028134404	4.74539361507062	4.66862548376504	4.76823687511098
11716217_a_at	3.62089466210228	3.18066179044876	3.36425057792887	3.13772870173214
11716218_s_at	5.81323521268191	5.83839126521217	5.88689342364087	5.91515939651775
11716219_a_at	3.59903679029529	3.55032458203702	3.24642177645894	3.65086534702662
11716220_x_at	5.79234754738725	5.72645523342239	5.83218997020116	6.08131181387589
11716221_at	2.73589902329352	2.81262474909927	2.77658205214692	2.99448290907722
11716222_a_at	4.93146767043089	4.71419761690185	4.71524331215097	4.55929398460616
11716223_a_at	8.88155558549402	9.01847543517892	8.81099713834339	9.12584325270787
11716224_a_at	4.00187448096603	4.24769768210763	3.91232774402817	4.12878597341034
11716225_a_at	2.83575677337969	2.8482454540648	2.8857114961201	2.97987028221627
11716226_a_at	2.62927539212175	2.55677702712986	2.56257100194798	2.33002995749275
11716227_a_at	2.50828254838543	2.67032754181022	2.53326838489319	2.55751598480864
11716228_x_at	3.48599644381472	3.72329031684683	3.59646420576607	3.61047875984525
11716229_s_at	5.14987782232341	5.75458563270742	5.63660151172207	5.46758682523347
11716230_s_at	3.35023127421355	3.55165692033157	3.49086607087611	3.10709440141119
11716231_s_at	3.00036830447767	2.95385915337572	2.82073892656557	3.24197751762331
11716232_at	5.94343329068832	5.87935574924594	5.83144229473894	5.89551983618131
11716233_a_at	4.579027195035	4.39605744577061	4.20372815913602	4.39438310634595
11716234_s_at	4.50140917379848	4.579660209331	4.46388587855939	4.41643803167374
11716235_a_at	3.7052581760088	3.75835568328381	3.890944456768	3.76741040461117
11716236_s_at	3.23160698677784	3.37250150338018	3.25220629785397	3.35554138058746
11716237_s_at	7.76299283039233	7.73881090166899	7.81827873528128	7.75503348240383
11716238_at	5.0121017813017	5.10881865611056	5.11669797787506	5.14827976969461
11716239_s_at	2.47955775076562	2.39090733155999	2.4327392968455	2.53871022652709
11716240_at	2.58147486937676	2.57289363278204	2.76108490178787	2.70697854310196
11716241_x_at	2.93576543787031	3.10403835222682	3.16626532886574	3.01085002276759
11716242_a_at	6.10628039153141	6.29416376762563	6.10413957598847	6.01957572712513
11716243_a_at	5.07976060944124	5.18470732977237	4.86809006307683	5.35685616539342
11716244_s_at	5.44970599859305	5.23786064196489	5.75970665127535	5.50149554579868
11716245_at	4.02890015380324	3.85154145227781	3.99328491057474	3.83892300550211
11716246_at	3.65018532396916	3.79794627759688	3.79280591585984	3.91342854403686
11716247_s_at	3.05031310001937	2.79759796553498	2.77134397894617	2.84461245208138
11716248_a_at	6.90320172005761	6.81565332635724	6.90240071197838	6.83529712934476
11716249_x_at	5.6048486470992	5.26785594776414	5.64083251174135	5.53786559210996
11716250_a_at	7.01799659151704	7.18801160380875	7.33208391230391	7.33684529933128
11716251_x_at	6.93606819603862	7.14320502250146	6.92059374045782	7.1964680894234
11716252_a_at	6.32927446430386	6.16871833202424	5.97152463136148	6.18841512246186
11716253_a_at	2.98321942012542	3.07569157240553	3.02432980254517	2.89111945764003
11716254_s_at	5.41541055456584	5.28103643084002	5.38634052936137	5.68307429661851
11716255_a_at	5.42379947637593	5.31471964754902	5.3750401150064	5.21928497629002
11716256_x_at	4.93722357159067	4.91655280124312	5.07873573060432	5.03876709421914
11716257_s_at	4.58191106806942	4.78514625040754	4.52321173845975	4.79616545228724
11716258_at	4.11803711433788	4.62360989776552	4.54875519256527	4.39511683767401
11716259_at	3.4782557495665	3.41641434361322	3.69221312588817	3.53531060569594
11716260_s_at	8.04786014842561	7.9122589146562	7.98969830389991	8.16987595348804
11716261_a_at	3.56075361857491	3.80221390834081	3.99609568738251	3.58393024692579
11716262_a_at	3.94394571060681	4.2419008715272	3.81279859607899	4.17514002813071
11716263_s_at	3.28884895443246	3.51894067551515	3.00228857131287	3.25722234200935
11716264_at	4.22585963439809	4.45500584910157	4.23486003380151	4.15107809742618
11716265_a_at	6.97197048425727	6.82335675507294	6.77479877132408	6.91184813216821
11716266_s_at	2.74936811452078	2.7853339862397	2.53142072946798	3.16762559645728
11716267_at	5.66987760200899	5.73468742210764	5.83819705777045	5.53358380262712
11716268_at	5.61615659507807	5.62360059841966	5.41143813940259	5.52875304199004
11716269_s_at	7.7756375589133	7.97727521151242	7.9215202386837	7.99009929356907
11716270_a_at	3.13698831391297	3.22997090084696	3.17113699660733	3.47305474209495
11716271_at	3.15059657950332	3.31857696508956	3.55207825510235	3.31857696508956
11716272_a_at	5.47037065699332	5.43602857787945	5.49464231458648	5.41175692028628
11716273_x_at	6.14324466060584	6.10442510092216	6.02234954508315	6.02060340454149
11716274_a_at	2.30463548827561	2.39758856696695	2.15048938684195	2.1533998085308
11716275_a_at	2.60969322190882	2.64233845383557	2.65578672474064	2.36716642927092
11716276_a_at	3.51840558580504	3.45574600195567	3.50549601851787	3.46676731665633
11716277_a_at	2.55888861578624	2.51016297952722	2.71518984061697	3.0148481030442
11716278_s_at	6.02601007834398	5.99427899486197	6.04437612813112	5.89406277302693
11716279_x_at	3.90748161009523	4.36399891885151	4.24639491483825	4.00504358304528
11716280_a_at	2.88259325948485	2.80498285063852	3.01298594886077	2.83402984580836
11716281_a_at	4.63840912650105	4.60221783130513	4.51565563570446	4.69170735429933
11716282_s_at	6.83455610875052	6.94372566382181	6.80562053869704	6.91248975508479
11716283_at	4.73737057213259	4.84539007057534	4.77848095455235	5.11138032733346
11716284_s_at	3.17149904110794	3.1241930071288	2.91958688223915	3.14439440659964
11716285_a_at	3.16290850927119	3.06467633409439	2.99796931336207	3.1880495296514
11716286_at	3.24075036623659	2.90327142994056	3.16805453501079	3.31898397810212
11716287_at	7.84735490113396	7.94354335035115	7.82682570686292	8.02176035341097
11716288_s_at	3.57193288512973	3.25195483571954	3.317049074262	2.99590880558247
11716289_a_at	7.68303924067449	8.37635985801713	8.08028737036125	8.40236702548762
11716290_a_at	3.59941405188264	3.65036459624356	3.95833911663268	3.42772012571268
11716291_s_at	3.09337346495128	2.96887114016552	2.89939015860593	3.04443456698627
11716292_a_at	6.08284193297461	5.96629025525279	6.15732229108485	5.9708142131774
11716293_x_at	5.55977193683149	5.59532302801482	5.8479822524388	5.7855853948064
11716294_a_at	2.45516745054016	2.77027395697899	2.84492218119108	2.7521835594233
11716295_at	7.3641274475915	7.48285392098643	7.38280166145977	7.39172375531464
11716296_at	3.73559827138207	4.08820418331186	3.55236406850743	3.71703460956103
11716297_a_at	2.27550054556918	2.43259329163015	2.46087247573729	2.32313388669762
11716298_x_at	6.86621894607641	7.11781206942939	7.00347212078342	6.93416979049382
11716299_a_at	2.31806362793581	2.35408865856497	2.20186267399588	2.30531174174232
11716300_x_at	2.18641756388224	1.97234317302841	1.98780565953124	2.06951768743657
11716301_a_at	4.27429689365875	4.45422097150459	4.25903513649744	4.1225844048873
11716302_s_at	4.10618229315096	4.28753010605614	3.9785045056981	4.35102422053066
11716303_s_at	3.23389457154458	3.2718733520982	3.22302964546988	3.14400006003413
11716304_a_at	4.31486751878754	4.25005395447653	4.28658662562983	4.24729540259049
11716305_at	5.82424926228437	5.73749055475471	5.62324479041931	5.5542548274531
11716306_a_at	3.48654750166738	3.40250476720678	3.45539194557191	3.45539194557191
11716307_at	4.90186197854896	4.78845683919656	5.1097747000055	4.90345935475259
11716308_s_at	3.24358166438619	3.16626532886574	3.1741211213948	3.06397163197508
11716309_a_at	3.30967251878234	3.5742441283502	3.64238530295259	3.60135910294932
11716310_a_at	2.96532306300395	2.92283603351664	2.8488344914441	2.74323873216819
11716311_x_at	7.04225291303718	7.38058223436402	7.30089312116444	7.29298788742713
11716312_at	3.79989299954214	3.60211441898864	3.61417235880759	3.75618973437719
11716313_x_at	3.64997689261016	3.94776024251963	3.70781044863418	3.89648446391308
11716314_at	5.15002115627053	5.19747146563954	5.11924502773143	5.08589846383848
11716315_at	2.40172308715726	2.54968974047197	2.61682257788017	2.68089428618619
11716316_x_at	5.27299980911441	5.15864958242589	5.29403892662541	5.35616977751622
11716317_at	6.31158206588489	6.479771321188	6.46916905242301	6.7038097894952
11716318_x_at	6.69209548673463	6.83772578510326	6.77672442541565	6.77828944409529
11716319_at	4.12474126949002	4.07174198142139	4.05848481503042	4.10894653224191
11716320_x_at	7.90872295678154	7.93308793327004	7.74868161555815	7.78626424861733
11716321_a_at	2.66812924489534	2.56107570135621	2.52662292766114	2.62893785758859
11716322_s_at	4.06787296566752	4.05685748950091	3.90742252218788	3.82847054026715
11716323_at	3.60830277925864	3.69565321344478	3.63120051976045	3.64648302986881
11716324_a_at	4.69044420351064	4.51393305623005	4.69697174892028	4.42363017524834
11716325_a_at	4.66453641700341	4.69843349030874	4.92674682206906	4.66582917070719
11716326_a_at	4.46403480739863	4.35658927386409	4.12796471885443	4.24301401671759
11716327_x_at	3.48306729913747	3.38014465948698	3.0463796405481	3.27051197871077
11716328_a_at	5.79476101780175	5.72732356631914	5.78882421069861	5.83676440619885
11716329_s_at	2.66425502022757	2.57072803678052	2.46015888258751	2.4893674555338
11716330_a_at	2.80628065878673	3.17167484230492	2.96398622415743	2.99934012709855
11716331_a_at	2.20860184600325	2.24535525214793	2.33245441959739	2.36437152626332
11716332_a_at	4.01938139467834	4.05214652587179	4.3352654528771	4.25915898435316
11716333_x_at	7.17453357324537	7.36558694826511	7.26922004381108	7.32894825927783
11716334_a_at	3.18342180034611	3.46753469601577	3.33627221062551	3.36523247707348
11716335_x_at	4.23486165545091	4.58683642648917	4.47280693817931	4.52373771048635
11716336_a_at	4.76154509022287	4.55059304416668	4.47101968866957	4.84636481373512
11716337_s_at	2.52826870180325	2.42314784895749	2.25965873413575	2.45182760077851
11716338_a_at	3.56919103568419	3.57869279417551	3.73064807163583	3.71318843316817
11716339_a_at	5.96123494014638	5.45959926510476	5.66750060107502	5.76962373870086
11716340_a_at	5.52991064739485	5.64405832709548	5.31264489248548	5.67828459134478
11716341_s_at	5.84326392624143	5.55614529535905	5.61412077415041	5.75031493004446
11716342_s_at	8.96451094519679	9.10769529167214	8.92999562812433	8.92258195568653
11716343_a_at	5.92519728254875	6.04692171729263	6.10414841874186	6.06397282766172
11716344_a_at	5.73564482914163	5.57052350101859	5.80348140606944	5.69384137047399
11716345_a_at	5.10909194804725	5.29207239334723	5.29965168446672	5.13984021082655
11716346_at	4.59799570709657	4.486266619973	4.7100800962182	4.32117963414008
11716347_a_at	2.26352159932504	2.18368123777365	2.32754291311056	2.26352159932504
11716348_s_at	4.6313798639781	4.45952340248641	4.38676984693629	4.24103077241744
11716349_a_at	3.78716475043503	3.88490146237958	3.99683825651338	3.97407693218207
11716350_a_at	6.26293004174241	5.9816849050059	6.70090966084231	6.8063104578249
11716351_s_at	4.81174924859274	4.7074826066378	4.58191106806942	4.85002343874429
11716352_a_at	6.24955552151809	5.95788331665236	6.29478144066441	6.01297140952142
11716353_x_at	7.42387456310867	7.3728578961798	7.4468075967388	7.39222668123296
11716354_a_at	6.72684397761356	6.73310393116462	6.62438895695102	6.59220746125514
11716355_s_at	5.93293410420361	5.97006879580846	5.83091649898203	5.84567762364593
11716356_at	2.86903048546788	2.71742621362582	2.79503595838123	3.09918123426483
11716357_a_at	5.8623703732141	6.0003915983416	5.94622523316759	5.91110927159562
11716358_s_at	4.28148467574088	4.13901366545751	3.82961178332529	4.04524936020499
11716359_a_at	2.88457844611231	3.09007952681658	2.95776949401395	2.90839511667653
11716360_a_at	3.07663246118592	3.12427208809308	3.06898127414357	2.89049569050796
11716361_a_at	7.46261595681124	7.92743784488678	7.59354453423578	7.78308595811485
11716362_a_at	3.24996864044921	3.23992653082036	3.1572225978356	3.23992653082036
11716363_x_at	5.30234178029874	5.3750401150064	5.25753272465846	5.26122474473937
11716364_s_at	4.26150893794769	4.52287370270659	4.3505561585903	4.55732966983687
11716365_x_at	4.62909606629785	4.92870803215885	4.68189631505103	4.72300669747079
11716366_s_at	3.72531764262823	3.71742659090949	3.56183066547827	3.42713848389016
11716367_s_at	3.46905308838435	3.85592556066369	3.67190105233317	3.61448301547909
11716368_x_at	4.41851555139562	3.96905726348654	3.75669888606735	4.09688590276961
11716369_x_at	13.116332638288	13.083811570485	13.0594187135914	13.1148923840129
11716370_x_at	6.88433628958369	6.84015615332736	6.93834475597666	6.75427446141287
11716371_a_at	4.44522705419978	4.74285084593247	4.30008987686392	4.75990093107984
11716372_at	4.20433719608803	4.01431038421139	3.99353326750942	3.93824523887685
11716373_a_at	4.50475882796817	4.44405462065252	4.4558318127765	4.35113692101428
11716374_s_at	3.34793929778471	3.41110986724404	3.28759246107677	3.56338478935134
11716375_s_at	4.02592684371749	4.09881870763195	4.08949454410676	3.82763025088281
11716376_at	3.9392946643009	4.02009191577405	4.03049438496224	4.17244507765977
11716377_s_at	7.49260877296708	7.66202162355767	7.45878296534804	7.37143844450707
11716378_a_at	3.25034042177135	3.1763429512986	3.51426922489124	3.19617405659734
11716379_s_at	2.30908082648849	2.33262603261799	2.39016540691929	2.56166024976767
11716380_a_at	4.84345733533911	4.69696821626203	4.76979613338449	4.8819379965774
11716381_x_at	3.15366763593806	3.27249021415527	3.13922303952675	3.35448823089146
11716382_a_at	5.42591749737851	5.24346621046047	5.130497585347	5.19260374510291
11716383_x_at	5.46512374043156	5.45150101018721	5.16895787681573	5.46094401063822
11716384_at	2.61668398250117	2.54415165399633	2.60902721332385	2.51618462718379
11716385_at	4.04586186779625	4.09419553256619	4.00108566998594	3.86361266638512
11716386_a_at	6.15604951050018	6.31746770747897	5.996662959427	6.17546678682942
11716387_s_at	3.55247179430082	3.21448480997871	3.29110075616048	3.33330990811867
11716388_a_at	4.82232903504363	4.71068203239486	4.67943532650431	4.66604883879877
11716389_a_at	5.95359031176861	5.68251332107177	5.74147340883315	5.80298996190007
11716390_a_at	3.43231389090084	3.31513268737642	3.41525930991634	3.80791077409629
11716391_a_at	3.59121458596179	3.96904438377676	3.56472130975753	3.66683495149119
11716392_s_at	2.11838528949522	2.47749535441767	2.22721246165918	2.11757242606374
11716393_x_at	3.72531764262823	3.51905756847734	3.79408581992782	3.89164091939559
11716394_x_at	3.69826945932417	3.7432335372384	3.61754538432604	3.70054937630767
11716395_a_at	4.15915519888553	4.14047917463097	4.20820507074568	4.05298151452235
11716396_a_at	6.3803174744533	6.009908250786	6.29933963254028	6.37775015119889
11716397_a_at	5.0121017813017	5.21196278400447	4.96171189732619	4.70765916150926
11716398_a_at	4.79579074879521	4.73958900941428	4.72085509628731	4.89375335440975
11716399_at	6.32542719914843	6.32928984729269	6.24874101431503	6.33053014667618
11716400_at	6.70023602338088	6.57934298250768	6.53886320038424	6.65353461639893
11716401_a_at	5.89148830500885	5.794885625288	5.70843678371655	5.79714513635362
11716402_at	4.5587270425796	4.77056821803881	4.7069933775736	4.51387325944483
11716403_at	3.56634148795118	3.60393146865636	3.63980400183344	3.7288990621375
11716404_s_at	6.22997752136538	6.29105336416931	6.29982947016547	6.19831313011977
11716405_a_at	4.45922710029538	4.59487402462893	4.56089329735561	4.61666681341566
11716406_x_at	7.09894995802148	6.99582246012185	7.09936494057615	7.11746787187479
11716407_a_at	5.14308981492546	5.25119627915899	5.25574505013516	5.19032167579862
11716408_a_at	3.08435078757027	3.31444250865295	3.42201215983534	3.24000444459458
11716409_at	5.0121017813017	4.99795192009489	4.84380581866124	4.95550233647448
11716410_at	4.88592905381659	4.80625391783429	4.86803073757787	4.78835560159558
11716411_x_at	5.55757224259079	5.73136548493585	5.45691058806401	5.65957441680646
11716412_s_at	3.05886497692235	2.93302038475561	2.92891479754751	3.12238860642891
11716413_x_at	6.15639971325059	6.1212192810827	6.19788294870748	6.09637473132747
11716414_a_at	6.03068289340196	5.96749573568626	6.09561188210999	5.89051429323111
11716415_s_at	5.40938219412027	5.165127495215	5.3750401150064	5.59058623768617
11716416_at	6.19859236535781	6.17863563368928	6.1576562719925	6.15780627597539
11716417_a_at	4.57771550613467	4.38621936648458	4.16339874434717	4.38621936648458
11716418_a_at	2.87234650127227	2.93204479705476	3.03999409337401	3.16624009076338
11716419_at	5.25558956881625	5.16870176097635	4.98567475534387	5.22084053153831
11716420_s_at	7.92122014326896	7.64659025447498	7.86906264912638	7.99023140267213
11716421_at	2.66570116438482	2.72773376609197	2.75985865969898	2.86433945752031
11716422_x_at	2.58818795869895	2.64235432387296	2.79650042530662	2.96674760974586
11716423_a_at	5.46604826910367	5.45486056250518	5.31449501530629	5.17022316904866
11716424_a_at	4.27760672343243	4.47167890336494	4.6337301961022	4.56984266770272
11716425_s_at	7.17797820137894	7.40476342907126	7.31740516911299	7.34428860070401
11716426_x_at	8.1661589488929	8.17533708199251	8.08347494974396	8.17117267823943
11716427_a_at	4.67943532650431	4.39978730513015	4.39194261756669	4.54808446951705
11716428_a_at	6.00138405910195	6.05826831180364	5.85321170848597	5.80986557646693
11716429_a_at	7.69739288746892	7.7066525942423	7.76663479511125	7.76996083289302
11716430_a_at	5.85189944161245	5.82652758241665	5.80087863384644	5.77623454940819
11716431_x_at	6.22099794304574	6.06891809053642	6.17497101099398	6.23208208541369
11716432_a_at	5.78788110157859	5.63509145631608	5.40938219412027	5.62933339711985
11716433_s_at	2.16068374215058	2.14944840180736	2.32978911360045	1.96962876223851
11716434_at	3.46747695403527	3.27058155186482	3.55874445445232	3.49770938721077
11716435_a_at	4.79804638523228	4.61079565829831	4.69160347327261	4.72656355885588
11716436_s_at	2.86086069817339	2.67754411944581	2.72124646524356	2.62465694108068
11716437_a_at	3.75227622962198	3.75227622962198	3.52794232174262	3.68908222655054
11716438_at	2.73310496130401	2.74793578216429	2.70002760546011	2.74880452228275
11716439_s_at	2.7566756369173	2.5635374941035	2.61441902531303	2.5118992249548
11716440_s_at	2.80995820385267	2.81429393910749	2.91294092447486	2.66229899725386
11716441_at	3.30729755222174	3.2039962821335	3.12057452778174	3.12871875853332
11716442_a_at	6.24315830789069	6.75522380413247	6.79430235011089	6.71215488065762
11716443_at	3.35236252336825	3.56316246598266	3.87255227047033	3.58547470185214
11716444_a_at	5.70826599350496	5.81679425975894	5.70826599350496	5.78830225789609
11716445_s_at	5.80087863384644	6.09880628876454	5.87649674108374	5.60976421522613
11716446_at	5.19611326516271	5.26348990012211	5.32606808246463	5.07724446887381
11716447_s_at	5.64267219083551	5.56688875795294	5.48443889257054	5.54264352368374
11716448_a_at	5.2627446864125	5.40840419155691	5.21940604908475	5.28258640687307
11716449_a_at	5.62717008618802	5.75726653822426	5.68871679313993	5.42082042255327
11716450_s_at	4.11468204863586	4.2891245510974	4.11468204863586	4.01499315000751
11716451_s_at	4.26073196964983	4.42119887108185	4.34825260142625	4.29000728441897
11716452_a_at	4.04655598517024	3.84125177233308	3.67011240354963	3.47714684141263
11716453_s_at	5.54276926010095	5.55380528808043	5.54276926010095	5.51663441595609
11716454_x_at	7.67771384226959	7.6919284300967	7.91972856851804	7.82017370833964
11716455_at	3.09905075703387	2.87784130775312	3.15193793539899	2.99880462058797
11716456_at	2.02844991765038	2.17138432978718	2.10689345463714	2.06030119129633
11716457_x_at	2.04033108483889	2.15726204168299	2.09632302166795	2.07489648954821
11716458_a_at	2.57100895237032	2.65073095850316	2.70093152127422	2.91247454175566
11716459_at	6.60688577958449	6.82813488556892	6.68834868893906	6.81502979154986
11716460_x_at	7.10509228540396	7.33381411221855	7.28117177480618	7.32642208885467
11716461_at	5.96874682239256	5.88733547763253	5.95112581197952	6.02372665153303
11716462_a_at	4.8237539073101	4.96752692029929	4.66278087125579	4.89289959053907
11716463_a_at	5.61926275263301	5.47195374829384	5.48358373132211	5.53835412067484
11716464_at	3.60284286038106	3.64758979211682	3.56468216028688	3.32747559161814
11716465_a_at	4.36100986481362	4.4545636559021	4.41208217170451	4.4326762139691
11716466_s_at	2.35752758323371	2.62902839873979	2.43500974832802	2.27285100721119
11716467_x_at	3.70342482547478	3.87976545783522	3.74496173395966	3.72558661746653
11716468_s_at	2.44933084925148	2.40009137602783	2.30670799872952	2.29518474781782
11716469_x_at	4.89926043347966	4.77981171298699	5.14073936018718	4.9995173920131
11716470_at	2.39746984391735	2.38372666018658	2.47380414279187	2.28447218102463
11716471_at	3.92224297837529	3.7783869787561	3.79931216971489	3.70245778929819
11716472_a_at	3.85136865273669	3.77607828486802	3.65748687369498	3.80431388384761
11716473_at	5.43532498806506	5.00537522881364	5.0337516070304	5.42008499846002
11716474_a_at	4.59313570972865	4.13928113129801	4.21453145234527	3.61786417422404
11716475_a_at	2.32020333713287	2.26106663875789	2.14996136523568	2.36407806540777
11716476_a_at	5.80280396404171	5.84909331236361	5.99696998915016	5.7295456853025
11716477_x_at	5.67365820434479	5.62375452485467	5.62375452485467	5.54693535029879
11716478_s_at	5.06020420995325	4.84282117822971	4.83378815496686	5.25594820494482
11716479_s_at	5.25538857627921	4.91288104443576	4.99337566477651	4.79805592210499
11716480_a_at	5.26255326570372	5.20318492901099	5.15864959769273	5.22461395038932
11716481_x_at	6.30176718846868	6.31149210320628	6.16327095276296	6.13895836595968
11716482_a_at	10.2614288443743	10.4728990880012	10.4155292531267	10.5014219389457
11716483_x_at	7.19737803034764	7.28683214639185	7.20399127728143	7.33193369434052
11716484_at	5.82788168462492	6.124709951572	6.20009287126666	6.14328735722256
11716485_at	3.58554889297211	3.70566078919721	3.20304242838787	3.53057349895967
11716486_at	4.55301092932474	4.58638722295344	4.49916402146415	4.44238462296636
11716487_a_at	3.57160699798907	3.52283008116642	3.67708808171168	3.51319788847001
11716488_x_at	5.28504035272665	5.28544237840318	5.30381711902988	5.30420009855336
11716489_a_at	3.49397516311775	3.61158081833747	3.50589849265742	3.45277007885825
11716490_a_at	3.57351387179084	3.52404504038901	3.55397961516246	3.24708433198018
11716491_s_at	6.4999643401145	6.50416795088789	6.58093608219347	6.3958328181569
11716492_s_at	5.21928497629002	5.00092101785603	4.81587184191542	5.00568027249794
11716493_a_at	7.8242505345468	7.68738032927148	7.71499264747599	7.60270233703442
11716494_a_at	4.67943532650431	4.63121950569267	4.63840912650105	4.53979629695062
11716495_a_at	4.84274135626459	4.90711605187748	5.18133932575031	4.64480235658888
11716496_s_at	5.4106033831474	5.92317982884162	5.51567893693461	5.68328567464076
11716497_at	6.18327058379855	6.22266304333047	6.11817533962753	6.0650932052028
11716498_s_at	6.00174057443144	6.23947300330779	5.86572462291566	6.19510632025959
11716499_x_at	6.85690135882313	6.79343526487701	6.79844154948836	6.72910846917666
11716500_a_at	2.41557457348939	2.50022946791894	2.3771958424358	2.68422569086453
11716501_a_at	5.47496083925285	5.45242587504969	5.43080210248165	5.65050778150776
11716502_x_at	5.28544237840318	5.37268673820844	5.25915237031676	5.51639275157622
11716503_a_at	6.40060328484282	6.43577840572388	6.51193457156769	6.24319945831038
11716504_x_at	4.05161677243281	3.83980307775074	4.10461805673705	4.02385691417789
11716505_a_at	6.91217832710706	6.14919137948771	6.78942433542363	6.90117384021578
11716506_s_at	9.19187391310878	8.52206970328376	8.97793472436387	9.19420121770621
11716507_at	2.27142759209395	2.62535375366053	2.42509981354959	2.43011940478179
11716508_at	2.37323525948958	2.48038946186707	2.44772313765862	2.57952848539009
11716509_a_at	6.27388115090956	6.43168245586756	6.23903692436454	6.29030221548797
11716510_at	5.57241012723876	5.70759140973374	5.34666472080568	5.54087427011336
11716511_x_at	6.55857334264278	6.56604150599095	6.66735466120167	6.50700515655354
11716512_a_at	5.46261342434651	5.16792689778985	4.89885848039594	4.94658066855355
11716513_a_at	2.31394948662574	2.46799075380949	2.36962566549786	2.36931832279727
11716514_s_at	3.66496160646771	3.83926766270002	3.9393485590724	3.88039567235867
11716515_x_at	6.50932106612738	6.65607053719687	6.5314384499578	6.61982104297487
11716516_a_at	5.2378365394872	5.19357451585553	5.64402521420325	5.266890815206
11716517_x_at	5.60055060174567	5.70041705563408	5.70599834558497	5.56983262382267
11716518_at	4.74558827716635	4.65253070777474	4.67737818092484	4.7938547850432
11716519_s_at	4.97276553755809	5.34574278439431	5.06820983237983	5.19860464225327
11716520_at	5.07726760072042	4.87976127266166	5.07726760072042	5.10313222551987
11716521_a_at	6.36630782121753	6.24469869528549	6.43746942615001	6.18485902090719
11716522_x_at	6.40663230330773	6.41661640451786	6.40313387741109	6.13375813413654
11716523_at	2.88900260264474	3.21879963549811	3.07291410455606	3.05254326987138
11716524_a_at	5.7069177119549	5.82410467145646	5.83546465151248	5.94349723075202
11716525_a_at	7.11633540323795	7.00367175929694	7.41735702083863	7.00947738293164
11716526_x_at	5.52552913538896	5.59485799371092	5.92479295933549	5.51762384434298
11716527_a_at	4.0574426217447	3.89119281627092	4.20740494238166	3.9066292624125
11716528_at	3.35219878763423	3.38375715663656	3.21804103618507	3.22759610298963
11716529_a_at	4.27175608316202	4.30704489700451	4.27455391679215	4.23805714159327
11716530_at	4.797568576224	4.95550233647448	5.00235492732236	4.89671427446357
11716531_at	3.43423084912848	3.15992217438256	3.25023603730381	3.31832813047877
11716532_a_at	2.88029409276234	2.68698229385538	2.62072428470084	2.86474329049584
11716533_a_at	2.40069911857142	2.50998928878512	2.37072580141956	2.61607157586773
11716534_s_at	2.42696741228372	2.73926414943939	2.43382709184169	2.22363367915065
11716535_a_at	4.85107978580528	4.83733660207451	5.02783730663603	4.55991132827967
11716536_a_at	6.93390350760509	7.23993025146039	6.9258193777617	7.31373831851561
11716537_s_at	8.89294949584537	9.40991949568609	8.85942122457925	9.28134860671314
11716538_x_at	7.66915234686509	7.9786029648793	7.66893619706888	8.06739914740211
11716539_a_at	5.98073546916587	6.10847928880691	6.12673570497257	6.24516000511232
11716540_a_at	3.21636718590953	3.32004712334326	3.00714659442658	3.26345777553491
11716541_a_at	5.15079364233221	4.97540186643822	4.96354786681717	5.00592594773726
11716542_x_at	4.57362559102072	4.41894049499073	4.55979983683273	4.42903006974449
11716543_a_at	7.75043599539041	7.86388942980141	7.73902194826794	7.66753822162216
11716544_at	5.02781896143601	5.10298166699875	4.92124707176269	4.84926974387105
11716545_x_at	6.7369872441746	6.76360852462663	6.81961840907377	6.68904581844717
11716546_s_at	6.24973517679453	6.20532898908354	6.09576057230772	6.12471038052179
11716547_s_at	6.04959665038277	6.04434086189582	5.85055054474531	6.14464145943084
11716548_x_at	4.43168839803963	4.47972596936138	4.41586020525421	4.47826867893131
11716549_s_at	5.07726760072042	5.33986499412534	5.23851618645524	5.22034208383517
11716550_at	5.49739759137613	5.64834122408948	5.52153727047134	5.60977429254444
11716551_s_at	3.63619456276299	3.64122546346729	3.65951245640581	3.48312482457838
11716552_a_at	2.62528955918904	2.3635500438015	2.19684707845324	2.09632302166795
11716553_a_at	5.66484916090097	5.75966521823525	5.85441359084416	5.67648533564886
11716554_a_at	3.16109256008077	3.23190219462209	3.49896414649062	3.13100638850334
11716555_at	7.71966458140531	7.98832070461623	7.82361787398206	7.98975462813132
11716556_a_at	5.54896098221603	5.3713875777252	5.33646170974324	5.26299642956571
11716557_a_at	4.27119383844294	4.58097960977832	4.61157749739826	4.45512421862195
11716558_at	4.8145542681249	5.248001385542	5.24325878599862	5.0521731364829
11716559_x_at	5.07957332366344	5.33155899814802	5.31845763735574	5.11395352316157
11716560_a_at	5.5922526131172	5.41174940322412	5.70022055759571	5.40245453225555
11716561_x_at	4.8490537997749	4.88474288886587	5.08667233958045	4.95840409082049
11716562_at	3.75939451138254	3.85492599195003	3.76043924001991	3.50800061008245
11716563_s_at	4.92321214224122	4.7146763127649	4.71458777672263	4.36341042859688
11716564_a_at	4.59265705010038	4.49232822814611	4.40002040688267	4.4758022064079
11716565_a_at	4.43276675248778	4.62290038851896	4.57050534152745	4.68413291513154
11716566_a_at	3.00589258552661	3.28559010294953	2.99013088776323	3.08097717042389
11716567_a_at	6.495115045307	5.72326902220162	6.07098805585825	6.38511388878748
11716568_a_at	4.92557013895539	4.76182744769844	4.94424307150982	4.7019781107372
11716569_at	4.51252795618042	4.78514625040754	4.73309279018961	4.3821663308171
11716570_a_at	7.31511517852855	7.33164235648758	7.44728216859643	7.43277469260426
11716571_at	6.23780761052877	6.26235891076728	6.10597935604908	6.02266535713955
11716572_s_at	3.52322430345597	3.70315923155224	3.77362513173031	3.75312082052275
11716573_a_at	2.43961352909827	2.47982894812935	2.47076864857044	2.56337037977854
11716574_at	2.77118172245602	2.89939015860593	2.84492218119108	2.93238294478517
11716575_a_at	3.6837920512823	3.84083776106081	3.65107384823753	3.79939525881623
11716576_a_at	3.29024458394241	3.20282993312178	3.52152855325816	3.02234754733592
11716577_s_at	5.49563800175541	5.5540279078664	5.3362562165774	5.50466433951952
11716578_at	3.81748906049622	4.16118124774716	3.92577571341317	3.81570087583528
11716579_a_at	5.90928069131987	5.68264271558898	5.8330978245072	5.42261810302855
11716580_s_at	2.15515507487473	2.1307666164634	2.17954353328605	2.15515507487473
11716581_a_at	5.61798770034976	6.03542158497749	5.98922731633251	6.3547976696889
11716582_a_at	7.41508149811157	7.37810122497513	7.26301440504642	7.64809641386771
11716583_a_at	3.61898348288152	3.70561303000092	3.70837100956928	3.65882002278073
11716584_x_at	4.27344024652224	4.38039873744909	4.38621936648458	4.42381817595193
11716585_a_at	3.00380890112193	3.06193488963336	3.02579027804153	3.08676958173194
11716586_a_at	4.85058907495624	4.77365583255242	4.89936599177889	4.75500202834227
11716587_at	2.95389953477748	2.8786917181154	2.92557864840575	2.92807672833073
11716588_at	2.3711594873982	2.5207836255265	2.39524362473022	2.5223876341973
11716589_x_at	2.77815330520933	2.96785281712377	3.04196885870094	2.87106765757822
11716590_s_at	3.13107166373795	3.00024168441475	2.86956229740593	2.92054363841499
11716591_a_at	3.01397757210061	3.22667012808471	2.85152315886078	2.91739351925942
11716592_s_at	4.49132261453344	4.44824369184871	4.54548897970745	4.60096265012888
11716593_x_at	5.09132439362835	5.58299757715946	5.35116292242974	5.72738809695614
11716594_a_at	2.9472052460484	3.09804865093559	2.96000094476116	2.66134923509416
11716595_s_at	3.6862474124578	3.50799854945834	3.54043847212259	3.50215343676503
11716596_a_at	4.97372226386922	5.248001385542	4.93841327199105	5.17837144256243
11716597_a_at	2.52056194519003	2.58998066745758	2.65932144496167	2.71196243817383
11716598_a_at	4.41851555139562	4.32692565705043	4.40591177305982	4.2001185544971
11716599_s_at	5.64387610554135	5.95888171655877	5.77476542856608	6.04421131114083
11716600_a_at	5.35407338862519	5.17511620473462	5.13857152021665	5.13545413613524
11716601_a_at	5.11924502773142	5.28544237840318	5.09354739075618	5.31114001537842
11716602_at	4.2727040768862	4.02195381865439	4.49604441492117	4.48998302484545
11716603_a_at	5.87967594850133	5.61211714208688	5.70504882834109	6.0140092310497
11716604_a_at	4.58398801443888	4.59887492405709	4.58398801443888	4.99884068600622
11716605_at	4.6678894237087	4.56456815738579	4.2781955895225	4.72699439638369
11716606_s_at	5.59250972328161	5.50842419584411	5.71568713397189	5.55633762855035
11716607_a_at	6.48996793649921	6.65657890196251	6.53858641742571	6.74323418691266
11716608_a_at	2.81001915958963	2.92382176801606	3.21544112545549	2.64750858481766
11716609_a_at	6.10327053677177	6.12879144985938	6.3264146905491	6.17609588617294
11716610_a_at	7.88046090309089	8.17077653413186	7.90116282939664	8.05283172300931
11716611_x_at	7.13596836463436	7.49577239601039	7.31060530183598	7.4568703971638
11716612_a_at	4.69539978369403	4.55153810835712	4.78313449280883	4.72660136242604
11716613_s_at	6.36049782726507	6.55073411952593	6.35213058055488	6.48782680346812
11716614_a_at	4.87776696247987	4.89330685100188	4.45689035775818	4.86411045719916
11716615_s_at	4.90165419695506	4.74248718211171	4.52268606793063	4.55864204378331
11716616_a_at	3.66968971720313	3.46900684440874	3.52953442484137	3.49452940528869
11716617_at	3.07369819384651	3.05984147257901	3.05608181210758	2.78372527837598
11716618_at	3.84271276550269	3.92037568309351	3.77437263645854	3.78961947167159
11716619_a_at	6.91922894496908	6.92343343535406	6.91493253617164	7.05349612652004
11716620_a_at	11.2195579443543	10.2406217837068	10.7891491024573	10.9572980176416
11716621_a_at	6.71233912518634	6.78149833650133	6.6288873346645	6.85968037944257
11716622_x_at	6.41577682907819	6.72202731255993	6.50296888601953	6.54433388435321
11716623_a_at	3.68679736123551	3.49286333356135	3.4659186935011	3.79931216971489
11716624_s_at	7.38801019625959	6.74204111527225	7.11633540323795	7.31749845425802
11716625_a_at	2.96286765488832	3.05213299417034	3.10804473834343	3.05213299417034
11716626_at	3.94845111227642	4.04506860867832	3.83568397651378	4.00392478269786
11716627_a_at	4.10581528986121	4.3010483764738	4.10581528986121	3.8577590590702
11716628_at	5.18946758340631	5.22677771503043	5.08516420162541	5.16378077244056
11716629_at	3.20607409302889	3.51192922102397	3.07522980518254	3.48618549600076
11716630_a_at	4.50438572714163	4.64593979119167	4.55128651714866	4.61828460400967
11716631_s_at	2.22292402572615	2.49688460470564	2.54059859691467	2.30669518951455
11716632_at	7.40300500778889	7.93090945474669	7.34832765237023	7.58869107639638
11716633_a_at	2.80746805145198	3.03087828181293	2.63736360234034	2.63412118278557
11716634_a_at	2.44929067619324	2.79293858087492	2.68440790593678	2.59540967756222
11716635_x_at	2.69259730711561	2.81262474909927	2.67261766266383	2.77014084971077
11716636_a_at	6.84643699557611	7.11887750163757	6.80948888917778	7.04255873037742
11716637_at	5.46148357780641	5.67662722207877	5.6388069709643	5.83605824005851
11716638_s_at	2.95248576101594	3.09337346495128	3.31421989464682	3.16626532886574
11716639_a_at	3.60474426817966	3.90635394519577	3.70189747320332	3.56816081408758
11716640_a_at	6.95033524484725	7.1054762696092	6.99713849310175	7.00897203822313
11716641_x_at	6.06607146772033	6.04983062607761	6.17127057475405	6.08676997489469
11716642_s_at	5.37219476542915	5.18853237928563	5.1358555643025	5.14501877449536
11716643_s_at	4.02169573812121	3.90759502962712	3.95085524856701	3.92858600388997
11716644_a_at	5.32194542447405	5.47900569601829	5.47900569601829	5.54665337199601
11716645_a_at	3.98730744396441	4.19507356436438	4.06089183778984	4.14864924316323
11716646_a_at	5.62510202385184	5.40414364443192	5.53513593414351	5.49410973414025
11716647_x_at	7.22511699011886	7.53649948251285	7.33259015573478	7.46963511810458
11716648_a_at	2.45753831279517	2.34990232255994	2.34937396078301	2.49523179909696
11716649_a_at	4.20820507074568	4.20820507074568	4.01850660946876	4.15247035305286
11716650_a_at	6.96294503443748	7.22873960126581	6.97697174481139	7.13065701046028
11716651_a_at	5.15543435441613	5.2459658376257	5.16854888448081	5.25042759282594
11716652_a_at	2.17822622205267	2.32713883250779	2.27481027489386	2.31577217914733
11716653_x_at	2.30746519324171	2.29054690814799	2.48831576550023	2.09632302166795
11716654_a_at	2.30612054903122	2.67787301867861	2.41904671154219	2.64463911631668
11716655_a_at	7.71012983730581	7.55688636824563	7.38820081474474	7.69881449485992
11716656_x_at	5.77586353981719	5.82081606553003	5.64687175541718	5.77586353981719
11716657_at	5.51839322424087	5.57478354112773	5.48063567613964	5.40176519755946
11716658_a_at	4.74342656078963	4.38007789642609	4.53422399785974	4.47666194926727
11716659_a_at	2.6324883580961	2.65097525942626	2.57997281246425	2.3635500438015
11716660_at	5.2824722074789	5.21774763226712	5.13133372183835	4.98072369356576
11716661_at	4.93162484264269	4.67547619724267	4.75614843642175	4.5941751396433
11716662_at	6.29942362709808	6.51772410765464	6.25274740919277	6.39159898244366
11716663_a_at	2.66815271164538	2.87384050134859	2.80262712704026	2.59850317715995
11716664_x_at	6.15555294434042	6.0982381322346	5.82652758241665	5.76748182421508
11716665_s_at	3.27246253714807	3.23684521707722	3.06392677334967	3.16934664260887
11716666_a_at	7.01452733111704	6.67071204696356	6.66915237819784	6.94100228258337
11716667_a_at	5.12820714259066	5.32408768372789	5.40042007926104	5.22129949228162
11716668_at	6.69144003820136	6.67898608249329	6.58178361087202	6.66667278261097
11716669_x_at	6.84428937757034	6.83592249775497	7.02235867900792	6.81145685419864
11716670_s_at	5.05510305346404	5.13995378784877	4.92356105497809	5.09808430291976
11716671_x_at	4.03960698867481	3.83387208750529	3.83248078549595	4.15776397017747
11716672_x_at	6.50083953073494	6.52438812316018	6.47430885632762	6.50352084756727
11716673_a_at	5.26851905962085	5.25065856362144	5.26033638404253	5.21929435650378
11716674_a_at	5.43207459092753	5.31946655852851	5.41550311946993	5.20694363118133
11716675_at	3.82661651731286	3.69070706992023	3.69122538367328	3.90712983858298
11716676_a_at	3.84052644570358	3.79835563859126	3.57783263580112	3.42671345402885
11716677_x_at	3.23904549469252	3.2199238411719	3.43269885300799	3.21483094975749
11716678_a_at	3.28170270994504	2.92203642578766	2.90932947126557	3.16643545181347
11716679_s_at	6.65832263573573	6.66525470845535	6.71766514113239	6.70540801310816
11716680_x_at	3.39041289926148	3.53257182063334	3.36481731515936	3.42713848389016
11716681_at	4.00215081680223	3.56795064056686	3.44811551813926	3.26068991337712
11716682_s_at	2.8278836212864	2.97564457491412	3.14872586482642	2.87313050913436
11716683_x_at	5.72849419435306	5.81835856939789	5.82528009845775	5.90046746736055
11716684_a_at	2.41005919490345	2.3204612298565	2.23619087069767	2.15773074210525
11716685_s_at	1.99143804921592	2.15593426040743	1.91222985424695	2.26557429600287
11716686_a_at	4.69861502455791	4.52373771048635	4.67943532650431	4.43368003597497
11716687_x_at	6.49796493802898	6.25482416971186	6.28735339792831	6.30374394231157
11716688_at	7.29936762043778	7.26994384973455	7.31705417189472	7.00976377528466
11716689_s_at	2.59470554669249	2.77020531756113	2.68570560096346	2.690394320239
11716690_x_at	5.93359072560866	5.84892232895313	5.95127727706559	6.01065216423762
11716691_a_at	3.3017767958928	3.36162862781977	3.32616525430413	3.2423833179288
11716692_x_at	3.5773141197581	3.69546242381227	3.82268315065891	3.44320650075651
11716693_a_at	3.08727653516751	3.10345517681564	2.90227300526564	2.91845164691377
11716694_at	3.34217331775893	3.4025583946518	3.24497140811369	3.00419123104385
11716695_a_at	3.30177246819551	3.15327092354992	3.16946298098472	3.10608076661068
11716696_s_at	2.8843289880404	2.99869275786499	2.74633497904767	3.00024823581939
11716697_at	3.24429061151219	3.31856427324178	3.2432714046024	3.29773052220635
11716698_s_at	5.37918922518156	5.19979898251012	5.08406370813771	5.22766903608849
11716699_a_at	7.07600062350648	7.01121805059613	6.97173570796436	7.05798281152031
11716700_at	5.51321791384292	5.45685474665785	5.45685474665785	5.33833445241171
11716701_a_at	4.06045179152889	4.08119486340942	3.88846686891396	3.94738142443985
11716702_a_at	3.34891649196383	2.80941418094647	2.74372597770121	3.083967123237
11716703_a_at	3.63045150315608	3.6757345196012	3.34427657347809	3.59535255084837
11716704_at	5.39830997214444	5.41568849522561	5.16177523845389	5.4870220129445
11716705_at	6.57534006242297	6.49983276637259	6.56604150599095	6.44212631304238
11716706_at	5.25240229208757	5.18752673276005	5.18752673276005	5.18009323569835
11716707_a_at	4.07115844823007	4.07855162715963	3.8910700417031	4.02340951290623
11716708_a_at	2.7832046117944	2.72773376609197	3.11601194047767	2.86433945752032
11716709_s_at	6.42843626195852	6.41307122333988	6.61266215418468	6.30463007218444
11716710_a_at	4.00583164570982	3.63250860499998	3.64894342535681	3.87007165642653
11716711_a_at	3.71824848193454	3.50938357807295	3.7197001190518	3.68567999831876
11716712_s_at	4.96577724160752	4.95671563498745	5.38619906060975	5.4642488430471
11716713_a_at	2.20150664209464	2.30463548827561	2.30463548827561	2.52107672431053
11716714_x_at	4.39292222507477	4.48587065731025	4.53875783567538	4.62771140196308
11716715_a_at	3.7431281716317	3.87961256349418	3.80245682755322	3.89191405479947
11716716_x_at	1.96165031779429	2.15086064586778	2.07800443425308	2.01712398675204
11716717_a_at	7.05112603932453	7.19439422669924	7.00545553270113	7.14565689784469
11716718_at	4.70303579385246	4.61148051810311	4.79961984669365	4.67635607743063
11716719_s_at	3.85181389805185	4.36996237656886	4.39468282152374	4.18713481314052
11716720_a_at	4.67639115557681	4.53367078995217	4.8839274393394	4.79821157617077
11716721_a_at	3.48863723665531	3.63025283776593	3.74953872950642	3.59763119542198
11716722_a_at	6.75821224545721	6.66887331425432	6.81056105636017	6.83364186930764
11716723_at	2.4398959953113	2.54222095256611	2.6594424682337	2.38187425531
11716724_x_at	2.66684777182049	2.75285050858463	2.61268140664649	2.4094695815812
11716725_a_at	4.00230866124598	4.01155797652074	4.03899055650786	4.01069304931462
11716726_a_at	6.62207496945951	7.0078497163626	6.81231163604871	6.85259341086455
11716727_x_at	6.6218188025303	6.62831078165722	6.47444191439832	6.531368623498
11716728_s_at	5.37531040580894	5.25707380778171	5.41604315519454	5.29858358437676
11716729_a_at	4.16377178733513	4.30120843998849	4.08346950948055	3.91565120291705
11716730_a_at	3.10091028936317	3.15978777677974	3.21770652349987	3.30064711862174
11716731_a_at	6.62802193533535	6.59042706148445	6.65655894761829	6.67569001892868
11716732_at	3.26147391611869	3.21029456048751	3.40802698198777	3.22861007453808
11716733_at	3.97096413769916	4.52125137463055	4.30291866898045	4.30291866898045
11716734_at	6.53785660567472	6.18039760942344	6.26401918265185	6.38507170563375
11716735_s_at	5.21151218893987	5.19317521719474	5.0074588002458	4.8897589181717
11716736_at	6.63962876595749	6.76131543647473	6.44573139041641	6.79100454593945
11716737_at	5.91993815370366	6.08722277138503	6.17567009687782	5.86542629058233
11716738_at	5.91286962979582	5.76648611258978	5.94179263093028	5.72868992130707
11716739_x_at	5.29428480917907	5.25224291612732	5.40482661163779	5.57520568414536
11716740_a_at	5.3894211558723	5.26932854250786	5.16448312697888	5.23819850278211
11716741_x_at	5.25951862328154	5.40938219412027	5.41456536289865	5.61190394575429
11716742_a_at	2.5590855006513	2.48245995895625	2.59765526596704	2.4870839650222
11716743_s_at	2.26874048378857	2.42926470775247	2.41144117220285	2.42632747032669
11716744_x_at	2.63039718609196	2.87033362925935	2.88940629850893	2.57997281246425
11716745_s_at	5.40938219412027	5.33986499412534	5.46120566397219	5.20408929907362
11716746_a_at	3.9541510737641	3.60562808343749	3.5618959279919	3.60275130379656
11716747_a_at	3.78846905617031	4.03094452845058	3.89444245037997	3.97781329250757
11716748_at	3.09337346495128	3.33330990811867	3.34010406331929	3.61017453535564
11716749_a_at	3.58768171636313	3.31348633936828	3.30271495993425	3.15313964211217
11716750_a_at	7.97394602250541	8.11521026852156	7.81774194249734	8.20887736168928
11716751_a_at	3.6185960170364	3.36010259625633	3.86517548620166	3.20166836386049
11716752_x_at	2.37826274208287	2.43911347062225	2.32969230709768	2.29221919309885
11716753_x_at	5.77584051385469	6.02575232732438	5.88558734344292	6.16840583284282
11716754_a_at	2.89799098230505	2.9425990765461	3.13448702429119	3.06248485731003
11716755_at	3.65538169997646	3.62242784054964	3.33202368996986	3.55863913582288
11716756_at	2.39859901308474	2.37154173441197	2.24117916126259	2.14977999085327
11716757_a_at	6.8360399618573	7.04711493349319	6.87817626325292	6.94969594479296
11716758_x_at	4.66625612197868	4.88267889064143	4.60734156645279	4.66625612197868
11716759_a_at	2.46115171512963	2.32032125416848	2.51915103338579	2.57203821175091
11716760_x_at	2.50135900238621	2.98511781594532	2.70989773368371	2.72773376609197
11716761_a_at	6.6686333267855	6.48930389720777	6.71668700165545	6.35985222981101
11716762_at	4.30288272885463	4.44403407865103	4.37419833122491	4.29357302710475
11716763_a_at	5.45463000440012	5.40328871043174	5.33305590045568	5.4740237929716
11716764_a_at	6.38227043716276	6.56868508851031	6.4686980006247	6.3106924300216
11716765_s_at	3.50222551180595	3.31061490114521	3.35422614722431	3.40622224478451
11716766_a_at	4.18612441201298	4.24137949376891	4.2968556355402	4.24285069110504
11716767_at	2.93142316914377	3.03345734585996	2.93944527182437	3.10197248578493
11716768_a_at	5.91206662563565	5.97841677354302	5.90879576763211	5.98168763154657
11716769_x_at	6.52108126942991	6.56604150599095	6.65423081083655	6.49983276637259
11716770_at	4.06604509999172	4.30600236095261	4.12570038479595	4.14031750037113
11716771_s_at	3.98811222301613	3.80662661516735	3.83521308385995	3.9107765106807
11716772_at	5.31830863910255	5.43599633542273	5.26895228771501	5.28313506423317
11716773_s_at	4.69692564430654	4.77296701439604	4.83094066606526	4.91641673003508
11716774_a_at	3.40924200785991	3.09337346495128	3.16626532886574	2.97165178229262
11716775_a_at	3.0009703258457	2.94591275010583	3.2838805263842	3.25427482325808
11716776_a_at	6.25989846605057	6.04848680713147	6.02572761241759	6.09938881437221
11716777_s_at	5.61468640695744	5.66814481360561	5.73228857512691	5.71356349498715
11716778_s_at	2.76398833575095	2.65068031059212	2.89669013204507	2.65068031059212
11716779_at	2.47097457633022	2.34863282634734	2.03032769423136	2.2187113466242
11716780_s_at	4.83271467247024	4.9544118832487	4.97557867010762	4.95550233647448
11716781_s_at	5.53398779986459	5.32602942038934	5.3591915607546	5.16802800374885
11716782_a_at	3.85723450348749	3.95277244739352	3.96939592549137	4.20758116226855
11716783_a_at	2.98511781594532	3.28888862616637	2.96985605878401	2.87462867213854
11716784_at	3.09337346495128	2.70517805658835	2.94131741774252	2.72235103095762
11716785_at	2.48555900544615	2.61080553258402	2.43530576171538	2.43911347062225
11716786_s_at	3.57488005815414	3.54694173677785	3.39918078315012	3.37124246177383
11716787_a_at	3.18056787373158	3.23877722277093	2.76917299040233	3.18056787373158
11716788_at	5.518390576266	5.59988960668576	5.77476542856608	5.5328193625974
11716789_s_at	2.99823508233909	3.19785837972738	3.24423096963925	3.32304807957589
11716790_x_at	2.97672740297712	3.02600239969869	2.96534025025911	3.18635766153698
11716791_a_at	2.82762441255868	3.10926358635165	3.15183487631704	2.89063523134426
11716792_s_at	3.65936433598319	3.46075645575381	3.31345960112362	3.83651846596709
11716793_a_at	6.50158639030663	6.60182695213259	6.61728999196584	6.73546700034946
11716794_a_at	10.5670411225807	10.5400448636779	10.4456498698528	10.6049974205526
11716795_s_at	2.84516814115629	2.67585422828909	2.5058630287833	2.87846168937221
11716796_s_at	3.47042665443525	3.4345670827126	3.33556189020669	3.28768220858807
11716797_s_at	2.63438810740654	2.50098669645486	2.64484837179177	2.57830932393639
11716798_x_at	2.98309836887855	2.84901345855863	3.01017430246539	2.65885817814231
11716799_at	4.9670239445507	5.15065296304889	4.96267902758245	4.96260129710223
11716800_at	6.34436252690949	6.15781645634833	6.21267900771119	6.21267900771119
11716801_at	8.67400088231166	8.10295409121572	8.311100757079	8.33396510402886
11716802_a_at	4.69281795242634	4.89728499007803	4.65084052541533	4.53983997388645
11716803_a_at	4.85661624682652	4.74947488989138	4.65167328642427	5.08790324173966
11716804_at	2.78765924693446	2.44593220450286	2.57507182155613	2.42432140354094
11716805_s_at	2.73812284466598	2.65904989836334	2.83453310261707	3.07330899032183
11716806_a_at	3.86935621582494	3.96380604471986	3.88387738879558	4.00864033580971
11716807_a_at	6.78789181347891	6.81661501086421	6.73130785527438	6.90988320915071
11716808_a_at	4.79980827217814	4.96874099793371	4.96874099793371	5.1170003736554
11716809_a_at	3.14923960091323	3.09536538713048	2.93231365148317	3.25075594095894
11716810_a_at	5.85742060830772	5.99028665986766	5.90677959811879	6.03534158591907
11716811_s_at	6.08744537912328	5.9188436122435	5.61400234715786	6.06067814257242
11716812_x_at	3.75895492971265	3.84806510706758	3.7609873960961	4.0431679270988
11716813_a_at	3.84488658334033	3.9423122086336	3.71693288622494	3.76138021252187
11716814_s_at	2.28468234194414	2.10573354526341	2.02543133862405	2.12892696609389
11716815_at	3.0251903486053	3.0251903486053	2.72622952180354	2.87104424717164
11716816_a_at	3.10984804225046	3.20857968181352	3.12269019507067	3.33823499148423
11716817_a_at	2.3660297743169	2.54172088811492	2.39348922729685	2.51422080440327
11716818_a_at	4.22572152899127	4.14039616534298	4.08784679060621	4.04660621649139
11716819_a_at	4.48292113568336	4.18579461354227	4.32577228024115	4.14499486209071
11716820_x_at	3.79006285382905	3.90905174076713	3.72531764262823	3.79006285382905
11716821_s_at	5.52153449614357	5.49365532680519	5.6758659686822	5.66026002949773
11716822_a_at	3.8829524752735	3.62773175789882	3.96565803149146	3.80663102287022
11716823_s_at	2.9351540339017	3.33690663117954	3.06827539275505	2.99093968041962
11716824_s_at	2.22651824847326	2.31109040882554	2.24707343968314	2.11022407597482
11716825_a_at	3.97637976359969	3.9115518378466	3.9779522102276	3.81609781776639
11716826_a_at	5.17610423305986	5.51025850867841	5.35342695090314	5.48738560808786
11716827_at	2.74426503059891	2.51337109119213	2.66485480131406	2.66485480131406
11716828_a_at	3.05851306218832	3.07549749924367	2.95504912415993	3.0126111727524
11716829_a_at	5.48344346081379	5.5420276550005	5.46375663574822	5.35019292045322
11716830_a_at	6.58799099977352	6.42016706777759	6.40914539350374	6.42018377133907
11716831_at	2.60536208056437	2.70497559524294	2.47119919765782	2.55247490219924
11716832_s_at	2.69951371446751	2.68630721474389	2.46988444608114	2.38731950482793
11716833_a_at	5.74063528973307	5.97890562513746	5.82932574118551	5.84969213792954
11716834_a_at	6.27608576532567	6.67590001416925	6.61092131619002	6.5857647187518
11716835_a_at	4.97572109388418	4.81041757366059	5.03408315822129	4.95550233647448
11716836_a_at	7.53137504202143	7.70569230965175	7.47150307131726	7.51569334964152
11716837_a_at	4.0722279174646	3.86760130038592	4.08907221162263	4.26864635786937
11716838_a_at	5.83733738955096	5.79947909144481	5.82606624097812	6.07366187090129
11716839_a_at	5.18530007903713	5.29370470024845	5.37762123765489	5.36471945421942
11716840_at	2.53889671860632	2.15916244497799	2.20596305726339	2.16148222115488
11716841_at	3.21431854035283	3.78242862855395	3.51054399145518	3.21236483271711
11716842_a_at	2.43307018326765	2.2166474146049	2.24707343968314	2.40797246498253
11716843_a_at	2.37185934287527	2.51205497762951	2.67529856058822	2.86204524911146
11716844_s_at	2.47812559234053	2.33728921500933	2.41947530685001	2.50674565531919
11716845_at	5.35830009140156	5.53135911986636	5.59380756467383	5.53628009311466
11716846_a_at	2.02496251667011	2.13201606020924	1.98911351268509	2.11292959243086
11716847_a_at	2.78344110122024	2.8014391582719	2.86759391010117	2.6978113481855
11716848_a_at	4.9681674164539	4.95550233647448	4.8696435373976	4.67163462483587
11716849_s_at	4.46531471817761	4.76263482273406	4.62105401510384	4.61507095089616
11716850_s_at	2.47570325293214	2.34956538112933	2.50246452028551	2.42153688775813
11716851_at	2.27494810216418	2.18209134770593	2.34062297271757	2.29301253473416
11716852_x_at	2.4897530778383	2.29011466892299	2.48672390860567	2.43787562255072
11716853_x_at	7.27547448006175	7.45881027279137	7.32072087460734	7.33510617780499
11716854_s_at	2.99780231844443	3.00972463859129	2.90314796318044	3.01412998101237
11716855_a_at	6.94867361732716	7.29483024531489	7.11964179629468	7.12567159271493
11716856_a_at	4.94840589424551	5.1218349916758	4.95690277772247	4.94322616369394
11716857_at	4.88862851405725	4.98277085053873	4.64747212520887	4.61446013858279
11716858_a_at	4.24953336643866	4.22573283243107	4.15327697848323	4.29971942286822
11716859_a_at	5.62378544827216	5.42847243072295	5.64518867824027	5.65728463066511
11716860_at	5.87511613347677	5.97152463136148	5.92293608030136	5.80087863384644
11716861_s_at	5.96308366727237	6.01476232636882	6.0139335240886	5.9532071471572
11716862_x_at	3.82250267455279	4.18501456590777	4.05089256087019	4.36418678375009
11716863_a_at	4.03992504807408	3.95714686810771	3.91332027498157	3.87532258726564
11716864_s_at	5.86164954746949	5.9188436122435	5.93160728933665	5.8184712030524
11716865_a_at	5.34833016106955	5.46950384829512	5.45203857006398	5.36375124902019
11716866_x_at	5.34833016106955	5.46177113357284	5.39193840560287	5.39193840560287
11716867_at	3.59511836688809	3.9344029309843	3.4981011680282	3.38888888136693
11716868_at	6.51312970928102	6.76767149609518	6.43926602479724	6.9510153681413
11716869_at	5.17065017775802	5.04572228614082	5.27297134921775	4.82846312242828
11716870_a_at	6.15268186799861	6.22922379940163	6.16457779063081	6.11156749651023
11716871_at	5.45496141359596	5.82710047339442	5.78984696019877	5.88211520335048
11716872_a_at	6.48512697646191	6.65672211792305	6.72922467428306	6.28066081574154
11716873_a_at	4.08513600964225	4.32631610140232	4.11615492997068	4.12743813674824
11716874_x_at	4.92791716681125	5.04180781300037	5.18826038964002	4.99185309025996
11716875_at	2.23287454670617	2.45134645202715	2.48741633352033	2.32910177625866
11716876_a_at	5.47862100413431	5.10560331222559	5.48172153731873	5.26325181237405
11716877_at	2.51996160047685	2.60020256926192	2.59538846610753	2.43315799000899
11716878_s_at	5.04708807846681	5.00297341128057	5.0792309481146	4.99035196452879
11716879_at	4.42077362880461	4.24331390485394	4.49770556793961	4.27551925804621
11716880_s_at	4.12148853565563	4.36302754617024	4.19604537482195	4.38750605024933
11716881_a_at	3.73916656575492	3.89617698888092	4.10006880294849	3.6928044672577
11716882_a_at	5.65363185768435	5.5496310311468	5.50213979317834	5.74844269103757
11716883_s_at	11.1632935520577	11.0337605228653	11.0498273336956	11.1222049498405
11716884_a_at	5.7531083062263	5.78543144075804	6.05149296444864	6.06597881651094
11716885_x_at	5.42353380989047	5.74495939285707	5.72787063805474	6.1280760389027
11716886_a_at	4.04181757940075	3.99367188440406	4.15956046955173	4.0083937796211
11716887_a_at	2.16479537315823	2.39857177074335	2.61464500050254	2.20529308215024
11716888_s_at	5.84697667690515	5.80184822901953	5.89041416777708	5.73428550598249
11716889_at	1.84555061524682	1.87710269622556	2.02750926939154	2.05365711568815
11716890_a_at	4.33280046422695	4.2222735340319	4.40396060452593	4.01537230041366
11716891_at	2.38937533510682	2.41083752600741	2.33181328651435	2.26811200348581
11716892_at	2.43259699244447	2.35637383099089	2.50717770346195	2.65636275752233
11716893_s_at	6.18051462847235	6.23838901183663	6.24916501267	6.03260535856304
11716894_x_at	4.78464798081136	5.23440995684333	4.79804638523228	5.09183699295738
11716895_s_at	7.21916055118572	6.91885342386179	6.84775744472465	6.95890886855092
11716896_a_at	5.5994064805474	5.72003546974492	5.50286902093966	5.57985335249433
11716897_x_at	5.15179230486917	5.24674883120442	5.07268955443515	5.22155331527367
11716898_at	2.75110296639709	2.87445226918199	3.10881179507295	2.99421046486789
11716899_s_at	5.25922500628053	4.8545257629634	5.01871931279075	5.14777755534671
11716900_at	5.38444986469961	5.50772691633589	5.54935745938734	5.55998551058995
11716901_s_at	2.99194222152653	2.94216391888847	3.00244483560086	3.23574867265487
11716902_a_at	5.57757132888773	5.71932062591172	5.62940778385176	5.76389004603834
11716903_a_at	3.76123697750107	3.67309976487327	3.86879146645811	3.78065425383031
11716904_s_at	2.18765260328397	2.35872901527506	2.31265951155006	2.26102124240135
11716905_a_at	4.39254114548951	4.48189036170961	4.58191106806942	4.60689564740296
11716906_a_at	2.5965707024495	2.62418844590941	2.58910828080846	2.5467004378121
11716907_s_at	4.82578411006764	4.97622066929581	4.69216553721112	4.89676175289098
11716908_a_at	6.05742386475868	6.32495199033443	6.16098142053509	5.90779062464651
11716909_a_at	4.65472360282217	4.49934077346125	4.7973299230106	4.89818318822729
11716910_x_at	4.60896710415967	4.52373771048636	4.7166960126387	4.58785826493668
11716911_a_at	5.53913649581622	5.63660151172206	5.6407184289027	5.42083048829144
11716912_x_at	4.87318434129907	4.8077672732339	4.77266319862212	4.50831548015548
11716913_a_at	2.42564344727526	2.81975962283955	2.45478316924156	2.42787877905874
11716914_a_at	4.43700519445363	4.39106909411562	4.51751844354836	4.50066902200187
11716915_a_at	2.41267319928711	2.26146040871076	2.38463689880275	2.42184265147287
11716916_a_at	6.03059284553722	6.17427497726044	6.14464145943084	5.93233898270295
11716917_a_at	6.50669244223966	6.60865565959262	6.35512502837142	6.43173113186105
11716918_a_at	5.81537228210176	5.74347896529911	5.75980567809987	5.84277068991219
11716919_a_at	3.66771115236285	3.96901114144013	3.91778790101821	3.861957597901
11716920_at	4.53143844330917	4.33438406240363	4.54999849254075	4.4579495927422
11716921_a_at	6.31078815961544	6.64162043309469	6.39898587271256	6.28708151119977
11716922_x_at	5.56095173587391	5.8596741954453	5.75039471814559	5.90840633906567
11716923_a_at	5.19638768456584	5.59716384240151	5.31284828475713	5.87989386550809
11716924_s_at	7.69221967613504	7.08130175102409	7.88806437796832	7.98663781585822
11716925_at	5.41476583324362	5.62307829985129	5.74936125209226	5.26938096892506
11716926_a_at	6.36749317021459	6.37046785841999	6.531368623498	6.36483109243645
11716927_a_at	3.2669698939543	3.39185785542896	3.0705147077543	3.0210108305941
11716928_a_at	4.94737913251003	4.59258670160842	4.67943532650431	4.63840912650105
11716929_a_at	4.72790634780441	4.95474176910233	4.87535165099844	4.83869443663903
11716930_x_at	5.42775781698839	5.76122131521053	5.43254868705188	5.67123886879466
11716931_at	5.42186401000829	5.4856318307768	5.24769682370296	5.35969951171758
11716932_a_at	5.11996552508245	5.248001385542	5.23851618645524	5.28249273904301
11716933_a_at	3.65979118963488	3.58050924145073	3.0610175065995	3.44346703169705
11716934_a_at	3.04992607317398	3.26247594572422	2.9351535409323	3.13756205655761
11716935_a_at	5.46060822113931	5.59140380772913	5.47363996114276	5.57837206772568
11716936_a_at	6.07401870632692	6.10474493929896	5.99994981296092	6.12810016724383
11716937_a_at	5.25156780502796	5.23260846224385	5.2464896733607	5.18395179274821
11716938_a_at	6.23120169460877	6.75695789226442	6.46111044063852	6.60596054299481
11716939_a_at	4.24774194533698	4.4374903462842	4.1602785583944	3.76236299127434
11716940_a_at	5.57371059649042	5.63262515201631	5.40219505179021	5.71372266981159
11716941_at	5.86399207240806	5.81430377835285	5.96033562870616	5.96057180707441
11716942_a_at	5.32306806371695	5.10767924688079	5.08932514768123	5.1495045113114
11716943_at	5.51511978268491	5.39264341281816	5.40092676702793	5.45987047133777
11716944_a_at	3.84668696228324	4.21452569468282	4.03673231064134	3.85978045200954
11716945_s_at	2.20490675349594	2.31196029703507	2.15048938684195	2.09462517995871
11716946_s_at	2.95975479145369	2.89439571398359	3.19256208078876	3.24105311944396
11716947_at	5.44032449376484	5.4282001022659	5.51154293469641	5.82951343117086
11716948_s_at	2.82884327499976	2.78793451175293	2.91815429960206	3.11005069734501
11716949_s_at	3.54934193712176	3.74961746639035	3.54934193712176	3.44186131054069
11716950_s_at	3.5861965698102	3.26291902402411	3.77631967651114	3.44220852236679
11716951_at	5.95708853774704	6.24542199133163	6.27033373990709	6.03340487297168
11716952_a_at	2.48185863365659	2.49985678373008	2.51305605881843	2.42862844495849
11716953_at	4.29485446988602	4.47299914528892	4.29485446988602	4.35332476984655
11716954_at	7.19374606356218	7.27820980920493	7.27578783793088	7.15733861716786
11716955_s_at	4.23799771427527	3.83933062366181	4.1396872490528	4.20120201376462
11716956_a_at	5.86295767356817	5.7962574253982	5.73557759520065	5.7962574253982
11716957_x_at	5.21928497629002	5.17441075057213	5.19000456511395	5.16799851342958
11716958_a_at	6.69818661534842	6.58664934157557	6.36782616492211	6.61846573080392
11716959_s_at	5.08941997062709	5.0758090953391	5.18694422906199	5.21928497629002
11716960_a_at	6.13948800571445	6.06294984720324	6.32132932628786	6.20694083894801
11716961_x_at	6.19218575723297	5.95189399447995	6.07715289535774	6.17321442233123
11716962_a_at	4.73981105152839	4.56906552323095	4.48333786589156	4.5177288375021
11716963_a_at	5.43323449803142	5.40279709450998	5.5456721702066	5.06049085343537
11716964_a_at	4.68597670547268	4.84515420347392	4.79602534698686	4.74185898181286
11716965_a_at	4.77327721947579	4.9410535967833	4.6413914627519	4.88088817886762
11716966_a_at	3.93277454817615	4.02703074748864	3.67123618171131	4.04347993420234
11716967_a_at	6.8899122871727	6.90969230141549	6.95056133869085	6.70310860082718
11716968_a_at	3.27276341377164	3.3343364508336	3.30562498153337	3.36418735010112
11716969_a_at	4.61015480795913	4.85843051110011	4.87793717703678	4.89671427446357
11716970_a_at	3.55473573814098	3.33330990811867	3.33371832686311	3.44123070450502
11716971_a_at	3.84327099642506	3.80249569565203	3.74544083952259	3.68751585770867
11716972_s_at	4.75400256696047	4.78514625040754	4.62011951541471	4.79804638523228
11716973_a_at	3.7325263761774	3.88914957857529	3.97656422939592	4.02384978281388
11716974_a_at	2.5712201146364	2.73648646391982	2.73648646391982	2.65385328927811
11716975_a_at	3.18597800522982	3.25659764493515	2.96351959132432	3.39029029970172
11716976_x_at	2.62030048275304	2.71794760821433	2.70428900822583	2.67662537870077
11716977_a_at	5.08359228919651	5.29115742550363	5.16007090598693	5.00164725630072
11716978_a_at	6.78558446623405	6.98642489179088	7.13378113881153	7.26365625669207
11716979_a_at	7.10024107251808	7.09678982146982	7.08324323728557	7.20944534250589
11716980_a_at	5.64122007846003	5.69357563726025	5.7894368869804	5.70589759315909
11716981_x_at	4.41529390609477	4.49227522220957	4.277775562093	4.17943730808807
11716982_at	3.57066828468429	3.36666196345072	3.23992653082036	3.37980422474627
11716983_at	6.28336364663427	6.33269741073289	6.33221193268922	6.35649888423926
11716984_a_at	7.20944534250589	7.237437105276	7.09493568273246	7.07303368188206
11716985_x_at	7.17442663149238	7.34078868981757	7.2047984733746	7.33385402618783
11716986_a_at	3.47493873954004	3.20586489245872	3.40107100996542	3.26497018246652
11716987_a_at	3.01137442089173	2.98793583499346	3.04685039051935	3.05906930586082
11716988_s_at	2.64382943793094	2.74574466189342	2.53268400493387	2.7167213018454
11716989_s_at	2.17769242115674	1.96292345241903	2.11649098145926	2.13199161737999
11716990_at	4.52373771048636	4.63667716372681	4.53175101030808	4.57007960779735
11716991_at	3.33894835507076	3.36494235041125	3.17355606159523	3.29119941974692
11716992_at	6.55630049796429	6.73595212993556	6.62528891144369	6.60008800319767
11716993_a_at	6.04214664265248	6.05624174430686	6.08310661900283	6.12286700942224
11716994_s_at	2.51644918295768	2.4773382554113	2.40177482859054	2.40093468926346
11716995_a_at	3.24659237748131	3.59577233135676	3.63168741879659	3.64705588759317
11716996_a_at	7.6106313934012	7.8872451935214	7.40068001617149	7.80717062670431
11716997_x_at	6.96578595818478	7.07145353413622	6.97182491188437	7.09854776593036
11716998_a_at	6.90220777090663	7.02984429133868	7.06760507953719	6.999872742416
11716999_a_at	2.38559408229501	2.35193201695307	2.66731751776986	2.76546925620528
11717000_s_at	5.32194542447405	5.54222772898228	5.54580234807275	5.54580234807275
11717001_s_at	2.96285695212493	2.55229469288459	2.80671510017457	3.0530841066034
11717002_a_at	3.46911664016935	3.3301671981507	3.32027431894693	3.30812612000325
11717003_s_at	4.8636459845499	4.97966907422963	4.99495175132918	5.05384615996983
11717004_s_at	3.73101426016843	3.71640722008046	3.63313277625549	3.60537462831383
11717005_a_at	4.89964055605594	5.03679639970992	4.94222864886771	4.90800340242153
11717006_a_at	4.16792122323028	4.20820507074568	4.35118102591545	4.32255553893635
11717007_x_at	5.90571823467817	6.02680636132303	6.02163898243996	5.92224934515746
11717008_a_at	2.84554931008849	2.80299955902082	2.73292481543713	2.73292481543713
11717009_s_at	2.44875522975356	2.37742086225107	2.12252142688655	2.52817128026626
11717010_a_at	2.19737214281768	2.19878141326254	2.41462597905316	2.10118249263303
11717011_a_at	3.86589660045146	3.94035209100278	3.86589660045146	3.82276612343197
11717012_s_at	2.74648450231966	2.59455597672317	2.43218233455685	2.57229125999105
11717013_a_at	5.02647959555963	4.66590140443241	4.96448841248072	4.93314687983888
11717014_x_at	5.10255999004493	4.90592405842816	4.99515893415021	5.25475514999517
11717015_a_at	4.90343187473699	5.25346949912598	5.10711228277293	5.02937781080915
11717016_a_at	6.19056229563312	6.17111526533951	6.41873524675902	6.36047591319392
11717017_a_at	3.35656794188292	3.25405245546057	3.30693963382569	3.07855268459193
11717018_a_at	7.86173242643672	7.90838767833485	7.63661865360211	7.76649404317988
11717019_x_at	8.69870180896027	8.97070566797079	8.62753088214625	9.23004566273728
11717020_a_at	4.6282922544648	4.76322717219028	4.68519677761899	4.58122492304395
11717021_s_at	7.18820492658583	7.04735534590839	7.25971637286787	6.94196074505394
11717022_x_at	5.54074215654336	5.49586028744162	5.58174537047326	5.43193349805215
11717023_a_at	5.65176285993612	5.85511462703054	5.88514944764134	6.14096767894822
11717024_at	6.77895693923731	7.29236752107037	7.02357789625572	6.74482276595207
11717025_s_at	5.44160421172035	5.36651962682307	5.339088203121	5.66385504425469
11717026_x_at	4.66886621835261	4.89671427446357	4.52373771048636	4.94428266429654
11717027_a_at	6.15112215013113	6.06243552123662	6.16192123627937	5.95316721432646
11717028_a_at	4.52956479370738	4.51213232405049	4.52956479370738	4.20640894050758
11717029_a_at	5.95696424509819	5.99930174338315	6.08380881894639	5.86233790770968
11717030_x_at	6.35843240711978	6.3551322565775	6.30760379443453	6.30430364389225
11717031_a_at	5.99607151451996	6.15522317338022	6.1942586447402	5.9144608225718
11717032_at	4.58191106806942	4.58514918899414	4.52373771048636	4.53988974368151
11717033_a_at	6.53650471634892	6.42831876543377	6.44706961675966	6.48558776841012
11717034_a_at	6.36718457291018	6.29937566750748	6.34024513458426	6.31238507708255
11717035_s_at	3.48306729913747	3.33330990811867	3.5421238938152	3.31537682417809
11717036_a_at	7.05557966058963	7.51682596709236	7.18138668227774	7.55663989562034
11717037_a_at	6.04983062607761	5.97152463136148	5.77476542856608	5.82652758241665
11717038_a_at	3.13861238488019	3.13861238488019	3.08444601970618	3.18021763769626
11717039_a_at	5.95563647075802	5.51186085926547	5.64766557761884	6.13770388989766
11717040_at	4.31055054711928	4.24496807052993	4.38621936648458	4.42424305026889
11717041_at	4.00964495181341	4.11355957390274	3.79117566056741	4.1795585693742
11717042_at	3.90216028281984	3.70619598910761	3.87552060166718	3.56103505842149
11717043_at	4.9816280669108	5.07822357056073	4.79985483579254	4.74493911682402
11717044_a_at	2.12119851233383	2.3635500438015	2.24707343968314	2.20596305726339
11717045_a_at	4.93100475924544	5.16440491671808	5.2030314895577	4.92010827068245
11717046_at	3.10338258156464	2.97683562225716	2.95299148404752	2.86433945752031
11717047_s_at	5.3873623689445	5.58859066932241	5.52206656321468	5.8694032464658
11717048_a_at	5.48178080060075	4.82383713880768	5.09305269666113	4.88958763711089
11717049_s_at	7.27285479890003	7.3506783807067	7.52869267644561	7.14298631691516
11717050_x_at	7.24294061481217	7.1244691754276	7.18551988776389	7.29775249921025
11717051_s_at	2.35579129377325	2.50415331462554	2.48548606053413	2.64484837179177
11717052_at	2.41054233561665	2.55542654636993	2.35789979716829	2.34246121459716
11717053_a_at	3.79199943969279	4.05620462014602	3.61911752246453	3.95859599481122
11717054_a_at	4.21800278830128	4.30820187562468	4.28300096737866	4.22463597956842
11717055_a_at	3.18579891725328	3.04468098334294	3.07479191773824	3.1422447509718
11717056_a_at	2.74273539660647	3.21262018936971	2.90142720929431	3.13706899350574
11717057_x_at	3.72531764262823	3.94502133263475	3.94502133263475	4.03357356228364
11717058_x_at	8.89693538097404	8.93110695800862	8.77767100406789	8.96522559946231
11717059_a_at	6.65398090644185	6.68371206902501	6.67974161303237	6.40874925654422
11717060_a_at	4.34913120933123	4.01693980153046	3.87080536878839	4.18713271190851
11717061_a_at	4.41271057240251	4.65253070777474	4.07855629678396	4.29399141701647
11717062_at	4.84812565206484	4.99090917924672	4.73309279018961	4.63231064939371
11717063_s_at	5.56983262382267	5.60462120340974	5.61271868773376	5.94834800301061
11717064_a_at	5.79229719508057	5.95710969780127	5.85855400810738	5.85170023093569
11717065_a_at	4.7134236262625	4.78227114439038	4.78150148120158	4.68000041227995
11717066_at	3.83835215446487	3.91206849194686	3.88566167030622	3.9453171188616
11717067_a_at	3.29614452709431	3.67265512065705	3.33157112502895	3.66909964635428
11717068_a_at	5.83152339117903	5.88362021592088	5.86760496639143	5.857806947813
11717069_at	3.44839806122293	3.5039181769535	3.43412296682196	3.55798446854189
11717070_x_at	3.19685813613918	3.43839081793744	3.21073522345891	3.03799161486657
11717071_at	5.98977538414694	6.19900732312915	6.18911552432772	6.14150160240483
11717072_x_at	6.28531053046026	5.98891878992481	6.18611121288425	6.30404715980259
11717073_a_at	6.40915712483738	6.14409918576739	6.22880285815701	6.22398578890798
11717074_a_at	6.51183167100727	6.23838901183663	6.38966453336776	6.30997508498321
11717075_a_at	4.36014049325135	3.68591738567316	4.09986365268248	4.17804147220001
11717076_s_at	2.53442818357233	2.44368959200153	2.56562560873417	2.92959282735465
11717077_x_at	6.66266399356964	6.28285578515166	6.61400001350624	6.99004336626298
11717078_s_at	3.37688873454995	3.06533506620229	3.23946785061906	3.43948847270619
11717079_a_at	5.46148877762496	5.52772028796044	5.51224314930225	5.66299356731744
11717080_x_at	5.4382630264119	5.56096939133315	5.63842612680981	5.75793407942951
11717081_a_at	3.37997796395088	2.95049453832858	2.99615827344226	3.02217810014969
11717082_a_at	5.52127619664571	5.37574705946555	5.58105548705494	5.51537121975022
11717083_x_at	4.53869074296935	4.52249386671173	4.44228048501825	4.44637192928018
11717084_a_at	7.2477966387294	7.14209865077249	7.17741133472646	7.20872516281127
11717085_a_at	4.4571034870601	4.5249123924628	4.5379577581238	4.70974591022511
11717086_x_at	6.49983276637259	6.33518245176761	6.3264146905491	6.22322649692894
11717087_s_at	4.00525429701818	3.35099430268916	3.63724317532137	3.88030127816344
11717088_s_at	9.90348647155078	8.98652607027974	9.59245571596784	9.9282260942232
11717089_x_at	4.64172490536535	4.24736936643984	4.48222133924286	4.50737527460587
11717090_a_at	3.57639472582521	3.57240104028413	3.72066681726979	3.65005592777983
11717091_s_at	4.21840796956357	4.13514753366894	4.34549454149485	3.98100143223528
11717092_s_at	11.8162885953562	11.5535271739294	11.8588742003723	11.9892990564822
11717093_at	5.6164734539901	5.67880599258149	5.79072620646977	5.68647775007245
11717094_x_at	5.74333005654366	5.6764482584513	5.84822480522503	5.71422306668689
11717095_s_at	5.82142334619957	6.02990005202356	5.81533850506292	6.04301616196155
11717096_a_at	2.51232861709937	2.46467667345608	2.89272373431044	2.61938216063849
11717097_a_at	2.29334458106888	2.34569725141549	2.57882590677643	2.60172816563263
11717098_a_at	3.68656493951652	3.71274738930952	4.15827073324869	3.89962559647607
[truncated: 47,496 more rows]
