# Supplementary material for: Clustering, Pathway Enrichment, and Protein-Protein Interaction Analysis of Gene Expression in Neurodevelopmental Disorders
Source: Adv Pharmacol Sci. 2018 Nov 27;2018:3632159. doi: 10.1155/2018/3632159 (PMC6288580; doi:10.1155/2018/3632159)
Supplement: Supplementary Materials — Gene expression matrix microarray raw files (CEL and CDF files) were used to make gene expression matrix using Affy package and RMA (robust multiarray average) method. This matrix file was used for further microarray analysis like clustering, pathway, and protein-protein interaction analysis. Pathway and protein-protein interaction result as generated from the Metascape tool is given. This file includes information about clustered formed within genes and network details with scores. Annotation and enrichment annotation file and pathway enrichment result as generated from the Metascape tool is given. Annotation file includes information about genes like gene symbol, gene description, GO biological process, protein function, and so on. [file 3632159.f1.zip › MCODE PATHWAYS PPI.csv]

Cluster	Gene	Score	Type	Symbol	Network	PATHWAYS
1	836	1.909090909	Seed	CASP3	list_SUB1	caspase 3(CASP3)
1	842	1.909090909	Clustered	CASP9	list_SUB1	caspase 9(CASP9)
1	581	1.909090909	Clustered	BAX	list_SUB1	BCL2 associated X, apoptosis regulator(BAX)
1	7157	1.909090909	Clustered	TP53	list_SUB1	tumor protein p53(TP53)
1	572	1.909090909	Clustered	BAD	list_SUB1	BCL2 associated agonist of cell death(BAD)
1	2932	1.909090909	Clustered	GSK3B	list_SUB1	glycogen synthase kinase 3 beta(GSK3B)
1	5460	1.909090909	Clustered	POU5F1	list_SUB1	POU class 5 homeobox 1(POU5F1)
1	1432	1.909090909	Clustered	MAPK14	list_SUB1	mitogen-activated protein kinase 14(MAPK14)
1	1385	1.909090909	Clustered	CREB1	list_SUB1	cAMP responsive element binding protein 1(CREB1)
1	6657	1.909090909	Clustered	SOX2	list_SUB1	SRY-box 2(SOX2)
1	9314	1.909090909	Clustered	KLF4	list_SUB1	Kruppel like factor 4(KLF4)
2	2475	1.555555556	Clustered	MTOR	list_SUB1	mechanistic target of rapamycin(MTOR)
2	5566	1.555555556	Clustered	PRKACA	list_SUB1	protein kinase cAMP-activated catalytic subunit alpha(PRKACA)
2	5602	1.555555556	Clustered	MAPK10	list_SUB1	mitogen-activated protein kinase 10(MAPK10)
2	6772	1.555555556	Clustered	STAT1	list_SUB1	signal transducer and activator of transcription 1(STAT1)
2	60	1.555555556	Clustered	ACTB	list_SUB1	actin beta(ACTB)
2	10018	1.555555556	Seed	BCL2L11	list_SUB1	BCL2 like 11(BCL2L11)
2	23411	1.555555556	Clustered	SIRT1	list_SUB1	sirtuin 1(SIRT1)
2	10381	1.555555556	Clustered	TUBB3	list_SUB1	tubulin beta 3 class III(TUBB3)
2	4609	1.555555556	Clustered	MYC	list_SUB1	v-myc avian myelocytomatosis viral oncogene homolog(MYC)
3	2597	1.25	Clustered	GAPDH	list_SUB1	glyceraldehyde-3-phosphate dehydrogenase(GAPDH)
3	841	1.25	Clustered	CASP8	list_SUB1	caspase 8(CASP8)
3	207	1.25	Clustered	AKT1	list_SUB1	AKT serine/threonine kinase 1(AKT1)
3	596	1.25	Seed	BCL2	list_SUB1	BCL2, apoptosis regulator(BCL2)
3	54205	1.25	Clustered	CYCS	list_SUB1	cytochrome c, somatic(CYCS)
3	5600	1.25	Clustered	MAPK11	list_SUB1	mitogen-activated protein kinase 11(MAPK11)
3	5603	1.25	Clustered	MAPK13	list_SUB1	mitogen-activated protein kinase 13(MAPK13)
3	1499	1.25	Clustered	CTNNB1	list_SUB1	catenin beta 1(CTNNB1)
