# Supplementary material for: Clustering, Pathway Enrichment, and Protein-Protein Interaction Analysis of Gene Expression in Neurodevelopmental Disorders
Source: Adv Pharmacol Sci. 2018 Nov 27;2018:3632159. doi: 10.1155/2018/3632159 (PMC6288580; doi:10.1155/2018/3632159)
Supplement: Supplementary Materials — Gene expression matrix microarray raw files (CEL and CDF files) were used to make gene expression matrix using Affy package and RMA (robust multiarray average) method. This matrix file was used for further microarray analysis like clustering, pathway, and protein-protein interaction analysis. Pathway and protein-protein interaction result as generated from the Metascape tool is given. This file includes information about clustered formed within genes and network details with scores. Annotation and enrichment annotation file and pathway enrichment result as generated from the Metascape tool is given. Annotation file includes information about genes like gene symbol, gene description, GO biological process, protein function, and so on. [file 3632159.f1.zip › METASCAPE RESULT.xlsx]

## Sheet: Annotation
Gene	original_id	list	Gene ID	Type	Tax ID	Homologene Gene ID	Homologene Gene Tax ID	Gene Symbol	Description	Biological Process (GO)	Kinase Class (UniProt)	Protein Function (Protein Atlas)	Subcellular Location (Protein Atlas)	Drug (DrugBank)	Canonical Pathways	Hallmark Gene Sets	hsa05210 Colorectal cancer	hsa04722 Neurotrophin signaling pathway	GO:0070997 neuron death	hsa04919 Thyroid hormone signaling path	hsa04550 Signaling pathways regulating	GO:0071417 cellular response to organonit	hsa04215 Apoptosis - multiple species	hsa04211 Longevity regulating pathway	GO:0010035 response to inorganic substanc	M2579 ST DIFFERENTIATION PATHWAY IN	GO:0032844 regulation of homeostatic proc	GO:0035094 response to nicotine	GO:0097194 execution phase of apoptosis	GO:0060322 head development	M13096 SA PROGRAMMED CELL DEATH	GO:0080135 regulation of cellular respons	GO:0009266 response to temperature stimul	GO:0001568 blood vessel development	GO:1904951 positive regulation of establi	M186 PID PDGFRB PATHWAY	TotalEvidenceCount
6855	SYP	1	6855	Gene_ID	H. sapiens	6855	H. sapiens	SYP	synaptophysin	GO:0048172 regulation of short-term neuronal synaptic plasticity;GO:2000474 regulation of opioid receptor signaling pathway;GO:0048169 regulation of long-term neuronal synaptic plasticity		Transporters					0	0	0	0	0	0	0	0	0	0	0	1	0	0	0	0	0	0	0	0	1
2475	MTOR	1	2475	Gene_ID	H. sapiens	2475	H. sapiens	MTOR	mechanistic target of rapamycin kinase	GO:1903691 positive regulation of wound healing, spreading of epidermal cells;GO:1904206 positive regulation of skeletal muscle hypertrophy;GO:1904213 negative regulation of iodide transmembrane transport	Atypical: PI3/PI4-kinase family	Enzymes/{ENZYME proteins/Transferases,Kinases/Atypical kinases}	Cytosol;Vesicles(Approved)	Pimecrolimus (Tfiiic-class transcription factor binding);Sirolimus (Tfiiic-class transcription factor binding);Everolimus (Tfiiic-class transcription factor binding);AP1903 (Tfiiic-class transcription factor binding);SF1126 (Tfiiic-class transcription factor binding);XL765 (Tfiiic-class transcription factor binding);Temsirolimus (Tfiiic-class transcription factor binding)	(M143)PID IL2 PI3K PATHWAY; (M249)PID PI3KCI AKT PATHWAY; (M161)PID IFNG PATHWAY	(M5951)HALLMARK SPERMATOGENESIS	1	1	1	1	0	1	0	1	1	0	1	1	1	1	0	1	1	0	1	0	1
581	BAX	1	581	Gene_ID	H. sapiens	581	H. sapiens	BAX	BCL2 associated X, apoptosis regulator	GO:0051281 positive regulation of release of sequestered calcium ion into cytosol;GO:1990117 B cell receptor apoptotic signaling pathway;GO:0060058 positive regulation of apoptotic process involved in mammary gland involution		Transporters/Transporter channels and pores			(M13096)SA PROGRAMMED CELL DEATH; (M32)PID HDAC CLASSIII PATHWAY; (M240)PID SYNDECAN 2 PATHWAY	(M5902)HALLMARK APOPTOSIS; (M5936)HALLMARK OXIDATIVE PHOSPHORYLATION; (M5939)HALLMARK P53 PATHWAY	1	1	1	1	1	1	1	1	1	1	1	1	1	1	1	1	0	1	0	0	1
223082	ZNRF2	1	223082	Gene_ID	H. sapiens	223082	H. sapiens	ZNRF2	zinc and ring finger 2	GO:0043161 proteasome-mediated ubiquitin-dependent protein catabolic process;GO:0000209 protein polyubiquitination;GO:0006511 ubiquitin-dependent protein catabolic process		Enzymes/ENZYME proteins/Transferases					0	0	0	1	0	0	0	0	0	0	0	0	0	0	0	0	0	0	0	0	1
54205	CYCS	1	54205	Gene_ID	H. sapiens	54205	H. sapiens	CYCS	cytochrome c, somatic	GO:0008635 activation of cysteine-type endopeptidase activity involved in apoptotic process by cytochrome c;GO:0006122 mitochondrial electron transport, ubiquinol to cytochrome c;GO:0006123 mitochondrial electron transport, cytochrome c to oxygen			Mitochondria(Enhanced)	Minocycline (Metal ion binding);Protoporphyrin Ix Containing Co (Metal ion binding);Heme C (Metal ion binding);Protoporphyrin Ix Containing Zn (Metal ion binding);N-Trimethyllysine (Metal ion binding);Zinc Substituted Heme C (Metal ion binding)	(M197)PID HIV NEF PATHWAY; (M144)PID CERAMIDE PATHWAY; (M220)PID CASPASE PATHWAY	(M5936)HALLMARK OXIDATIVE PHOSPHORYLATION	1	1	1	0	0	0	1	1	1	0	0	1	0	0	0	0	1	0	1	0	1
2932	GSK3B	1	2932	Gene_ID	H. sapiens	2932	H. sapiens	GSK3B	glycogen synthase kinase 3 beta	GO:2000077 negative regulation of type B pancreatic cell development;GO:0051534 negative regulation of NFAT protein import into nucleus;GO:1901030 positive regulation of mitochondrial outer membrane permeabilization involved in apoptotic signaling pathway	CMGC Ser/Thr protein kinase family	Enzymes/{ENZYME proteins/Transferases,Kinases/CMGC Ser/Thr protein kinases}	Nucleus(Enhanced)	Lithium (Ubiquitin protein ligase binding);3-[3-(2,3-Dihydroxy-Propylamino)-Phenyl]-4-(5-Fluoro-1-Methyl-1h-Indol-3-Yl)-Pyrrole-2,5-Dione (Ubiquitin protein ligase binding);I-5 (Ubiquitin protein ligase binding);N-(4-Methoxybenzyl)-N'-(5-Nitro-1,3-Thiazol-2-Yl)Urea (Ubiquitin protein ligase binding);Staurosporine (Ubiquitin protein ligase binding);Indirubin-3'-Monoxime (Ubiquitin protein ligase b…	(M31)PID BETA CATENIN DEG PATHWAY; (M90)PID WNT CANONICAL PATHWAY; (M139)PID MYC PATHWAY	(M5923)HALLMARK PI3K AKT MTOR SIGNALING; (M5924)HALLMARK MTORC1 SIGNALING	1	1	1	1	1	1	1	1	0	0	0	1	0	1	0	1	1	1	1	0	1
5286	PIK3C2A	1	5286	Gene_ID	H. sapiens	5286	H. sapiens	PIK3C2A	phosphatidylinositol-4-phosphate 3-kinase catalytic subunit type 2 alpha	GO:0090050 positive regulation of cell migration involved in sprouting angiogenesis;GO:1903672 positive regulation of sprouting angiogenesis;GO:0090049 regulation of cell migration involved in sprouting angiogenesis		Enzymes/ENZYME proteins/Transferases	Nucleus(Supported)		(M160)PID AVB3 INTEGRIN PATHWAY		0	1	0	1	0	1	0	1	1	0	0	0	0	0	0	0	0	1	0	0	1
5460	POU5F1	1	5460	Gene_ID	H. sapiens	5460	H. sapiens	POU5F1	POU class 5 homeobox 1	GO:0001714 endodermal cell fate specification;GO:0060965 negative regulation of gene silencing by miRNA;GO:0001711 endodermal cell fate commitment		Transcription factors/Helix-turn-helix domains	Cytosol;Nucleoplasm(Supported)		(M44)PID HIF2PATHWAY		0	0	0	1	1	0	0	0	0	0	0	0	0	0	0	0	0	0	0	0	1
225689	MAPK15	1	225689	Gene_ID	H. sapiens	225689	H. sapiens	MAPK15	mitogen-activated protein kinase 15	GO:0032212 positive regulation of telomere maintenance via telomerase;GO:1904355 positive regulation of telomere capping;GO:1904358 positive regulation of telomere maintenance via telomere lengthening	CMGC Ser/Thr protein kinase family	Enzymes/{ENZYME proteins/Transferases,Kinases/CMGC Ser/Thr protein kinases}	Cell Junctions;Cytosol;Nucleoplasm(Approved)				0	1	1	0	0	0	0	0	0	0	1	0	0	0	0	0	0	0	0	0	1
10018	BCL2L11	1	10018	Gene_ID	H. sapiens	10018	H. sapiens	BCL2L11	BCL2 like 11	GO:0060139 positive regulation of apoptotic process by virus;GO:0052151 positive regulation by symbiont of host apoptotic process;GO:0052501 positive regulation by organism of apoptotic process in other organism involved in symbiotic interaction		Transporters/Accessory Factors Involved in Transport			(M13096)SA PROGRAMMED CELL DEATH; (M136)PID FOXO PATHWAY; (M153)PID P75 NTR PATHWAY	(M5941)HALLMARK UV RESPONSE UP; (M5902)HALLMARK APOPTOSIS; (M5893)HALLMARK MITOTIC SPINDLE	1	1	1	1	0	1	1	0	1	0	0	0	1	1	1	1	0	0	1	0	1
23411	SIRT1	1	23411	Gene_ID	H. sapiens	23411	H. sapiens	SIRT1	sirtuin 1	GO:0031393 negative regulation of prostaglandin biosynthetic process;GO:0071441 negative regulation of histone H3-K14 acetylation;GO:2000619 negative regulation of histone H4-K16 acetylation			Cytosol;Mitochondria;Nucleus(Enhanced)	SRT501 (Transcription factor binding)	(M32)PID HDAC CLASSIII PATHWAY; (M44)PID HIF2PATHWAY; (M136)PID FOXO PATHWAY	(M5951)HALLMARK SPERMATOGENESIS	1	1	1	1	0	1	0	1	1	0	1	1	1	0	1	1	1	1	1	0	1
4609	MYC	1	4609	Gene_ID	H. sapiens	4609	H. sapiens	MYC	MYC proto-oncogene, bHLH transcription factor	GO:0090096 positive regulation of metanephric cap mesenchymal cell proliferation;GO:0090095 regulation of metanephric cap mesenchymal cell proliferation;GO:0090094 metanephric cap mesenchymal cell proliferation involved in metanephros development		Transcription factors/Basic domains	Nucleoplasm(Enhanced)	Nadroparin (Transcriptional activator activity, rna polymerase ii core promoter proximal region sequence-specific binding)	(M139)PID MYC PATHWAY; (M234)PID IL2 STAT5 PATHWAY; (M45)PID CD40 PATHWAY	(M5895)HALLMARK WNT BETA CATENIN SIGNALING; (M5928)HALLMARK MYC TARGETS V2; (M5942)HALLMARK UV RESPONSE DN	1	1	1	1	1	0	0	1	1	0	1	0	1	0	0	1	0	1	0	1	1
1499	CTNNB1	1	1499	Gene_ID	H. sapiens	1499	H. sapiens	CTNNB1	catenin beta 1	GO:0003340 negative regulation of mesenchymal to epithelial transition involved in metanephros morphogenesis;GO:0003339 regulation of mesenchymal to epithelial transition involved in metanephros morphogenesis;GO:0060492 lung induction			Plasma membrane(Enhanced)	Urea (Transcription regulatory region dna binding)	(M31)PID BETA CATENIN DEG PATHWAY; (M90)PID WNT CANONICAL PATHWAY; (M184)PID ECADHERIN KERATINOCYTE PATHWAY	(M5895)HALLMARK WNT BETA CATENIN SIGNALING; (M5896)HALLMARK TGF BETA SIGNALING; (M5892)HALLMARK CHOLESTEROL HOMEOSTASIS	1	1	1	1	1	1	1	1	1	1	1	0	1	1	1	1	1	1	1	0	1
9314	KLF4	1	9314	Gene_ID	H. sapiens	9314	H. sapiens	KLF4	Kruppel like factor 4	GO:1904998 negative regulation of leukocyte adhesion to arterial endothelial cell;GO:0007500 mesodermal cell fate determination;GO:0014740 negative regulation of muscle hyperplasia		Transcription factors/Zinc-coordinating DNA-binding domains	Nucleoplasm(Supported)		(M223)PID BETA CATENIN NUC PATHWAY	(M5953)HALLMARK KRAS SIGNALING UP; (M5890)HALLMARK TNFA SIGNALING VIA NFKB; (M5907)HALLMARK ESTROGEN RESPONSE LATE	0	1	1	1	1	1	0	1	1	1	0	1	1	0	0	1	0	1	1	0	1
107	ADCY1	1	107	Gene_ID	H. sapiens	107	H. sapiens	ADCY1	adenylate cyclase 1	GO:0034199 activation of protein kinase A activity;GO:0071377 cellular response to glucagon stimulus;GO:0003091 renal water homeostasis		Enzymes/ENZYME proteins/Lyases	Mitochondria(Approved)	Adenosine monophosphate (Metal ion binding);Adenosine triphosphate (Metal ion binding)	(M56)PID LPA4 PATHWAY; (M8)PID ENDOTHELIN PATHWAY; (M15)PID LYSOPHOSPHOLIPID PATHWAY	(M5906)HALLMARK ESTROGEN RESPONSE EARLY	1	1	0	1	0	1	0	1	1	1	1	1	0	1	0	0	0	0	0	0	1
11131	CAPN11	1	11131	Gene_ID	H. sapiens	11131	H. sapiens	CAPN11	calpain 11	GO:0006508 proteolysis;GO:0019538 protein metabolic process;GO:1901564 organonitrogen compound metabolic process		Enzymes/Peptidases/Cysteine-type peptidases					0	0	0	0	0	0	0	0	0	0	0	0	0	0	0	0	0	0	0	0	1
5594	MAPK1	1	5594	Gene_ID	H. sapiens	5594	H. sapiens	MAPK1	mitogen-activated protein kinase 1	GO:0060397 JAK-STAT cascade involved in growth hormone signaling pathway;GO:0015966 diadenosine tetraphosphate biosynthetic process;GO:0033160 positive regulation of protein import into nucleus, translocation	CMGC Ser/Thr protein kinase family	Enzymes/{ENZYME proteins/Transferases,Kinases/CMGC Ser/Thr protein kinases};RAS pathway related proteins		Isoprenaline (Rna polymerase ii carboxy-terminal domain kinase activity);Arsenic trioxide (Rna polymerase ii carboxy-terminal domain kinase activity);Olomoucine (Rna polymerase ii carboxy-terminal domain kinase activity);Phosphonothreonine (Rna polymerase ii carboxy-terminal domain kinase activity);Purvalanol (Rna polymerase ii carboxy-terminal domain kinase activity);SB220025 (Rna polymerase ii …	(M134)PID TCR RAS PATHWAY; (M64)PID S1P S1P4 PATHWAY; (M120)PID ARF6 DOWNSTREAM PATHWAY	(M5910)HALLMARK PROTEIN SECRETION; (M5923)HALLMARK PI3K AKT MTOR SIGNALING	1	1	1	1	1	1	1	1	1	1	1	1	1	1	0	1	1	1	1	1	1
5288	PIK3C2G	1	5288	Gene_ID	H. sapiens	5288	H. sapiens	PIK3C2G	phosphatidylinositol-4-phosphate 3-kinase catalytic subunit type 2 gamma	GO:0039694 viral RNA genome replication;GO:0036092 phosphatidylinositol-3-phosphate biosynthetic process;GO:0046854 phosphatidylinositol phosphorylation		Enzymes/ENZYME proteins/Transferases			(M2579)ST DIFFERENTIATION PATHWAY IN PC12 CELLS		0	0	0	1	0	0	0	0	1	1	0	0	0	0	0	0	0	0	0	0	1
50674	NEUROG3	1	50674	Gene_ID	H. sapiens	50674	H. sapiens	NEUROG3	neurogenin 3	GO:0048814 regulation of dendrite morphogenesis;GO:0060290 transdifferentiation;GO:0048813 dendrite morphogenesis		Transcription factors/Basic domains			(M288)PID HES HEY PATHWAY	(M5957)HALLMARK PANCREAS BETA CELLS	0	1	0	0	0	0	0	1	0	1	0	0	0	1	0	0	0	1	0	0	1
1432	MAPK14	1	1432	Gene_ID	H. sapiens	1432	H. sapiens	MAPK14	mitogen-activated protein kinase 14	GO:2001184 positive regulation of interleukin-12 secretion;GO:0002741 positive regulation of cytokine secretion involved in immune response;GO:0010759 positive regulation of macrophage chemotaxis	CMGC Ser/Thr protein kinase family	Enzymes/{ENZYME proteins/Transferases,Kinases/CMGC Ser/Thr protein kinases}	Nuclear speckles(Supported)	4-[5-[2-(1-Phenyl-Ethylamino)-Pyrimidin-4-Yl]-1-Methyl-4-(3-Trifluoromethylphenyl)-1h-Imidazol-2-Yl]-Piperidine (Protein serine/threonine kinase activity);N-[(3z)-5-Tert-Butyl-2-Phenyl-1,2-Dihydro-3h-Pyrazol-3-Ylidene]-N'-(4-Chlorophenyl)Urea (Protein serine/threonine kinase activity);1-(2,6-Dichlorophenyl)-5-(2,4-Difluorophenyl)-7-Piperidin-4-Yl-3,4-Dihydroquinolin-2(1h)-One (Protein serine/thre…	(M26)PID NFKAPPAB ATYPICAL PATHWAY; (M199)PID P38 MK2 PATHWAY; (M268)PID S1P S1P2 PATHWAY	(M5942)HALLMARK UV RESPONSE DN; (M5915)HALLMARK APICAL JUNCTION; (M5901)HALLMARK G2M CHECKPOINT	1	1	1	1	1	1	0	1	1	1	1	0	1	1	0	1	1	1	1	1	1
842	CASP9	1	842	Gene_ID	H. sapiens	842	H. sapiens	CASP9	caspase 9	GO:0008635 activation of cysteine-type endopeptidase activity involved in apoptotic process by cytochrome c;GO:0006919 activation of cysteine-type endopeptidase activity involved in apoptotic process;GO:0071549 cellular response to dexamethasone stimulus		Enzymes/{ENZYME proteins/Hydrolases,Peptidases/Cysteine-type peptidases}	Mitochondria(Approved)		(M13096)SA PROGRAMMED CELL DEATH; (M7997)SA CASPASE CASCADE; (M197)PID HIV NEF PATHWAY	(M5946)HALLMARK COAGULATION; (M5902)HALLMARK APOPTOSIS; (M5921)HALLMARK COMPLEMENT	1	1	1	1	0	1	1	1	1	1	0	1	1	0	1	1	0	0	0	0	1
841	CASP8	1	841	Gene_ID	H. sapiens	841	H. sapiens	CASP8	caspase 8	GO:0039650 suppression by virus of host cysteine-type endopeptidase activity involved in apoptotic process;GO:0039513 suppression by virus of host catalytic activity;GO:0039516 modulation by virus of host catalytic activity		Enzymes/{ENZYME proteins/Hydrolases,Peptidases/Cysteine-type peptidases}	Cytosol(Enhanced)Nucleoplasm(Approved)		(M5060)SA FAS SIGNALING; (M7997)SA CASPASE CASCADE; (M79)PID TRAIL PATHWAY	(M5911)HALLMARK INTERFERON ALPHA RESPONSE; (M5902)HALLMARK APOPTOSIS; (M5913)HALLMARK INTERFERON GAMMA RESPONSE	1	1	1	1	0	1	1	0	1	0	1	1	1	0	1	1	1	0	1	0	1
6657	SOX2	1	6657	Gene_ID	H. sapiens	6657	H. sapiens	SOX2	SRY-box 2	GO:0001714 endodermal cell fate specification;GO:0021984 adenohypophysis development;GO:0001711 endodermal cell fate commitment		Transcription factors/Other all-alpha-helical DNA-binding domains	Nucleoplasm(Supported)				1	1	1	1	1	0	0	1	0	0	0	1	1	1	0	1	0	1	0	0	1
947	CD34	1	947	Gene_ID	H. sapiens	947	H. sapiens	CD34	CD34 molecule	GO:0072254 metanephric glomerular mesangial cell differentiation;GO:1900168 positive regulation of glial cell-derived neurotrophic factor secretion;GO:0072223 metanephric glomerular mesangium development		CD markers	Cell Junctions;Nucleus;Plasma membrane(Approved)		(M195)PID CMYB PATHWAY	(M5915)HALLMARK APICAL JUNCTION	0	0	1	1	0	0	0	1	1	0	1	1	0	0	0	1	1	1	1	1	1
4914	NTRK1	1	4914	Gene_ID	H. sapiens	4914	H. sapiens	NTRK1	neurotrophic receptor tyrosine kinase 1	GO:0061368 behavioral response to formalin induced pain;GO:0061366 behavioral response to chemical pain;GO:0060385 axonogenesis involved in innervation	Tyr protein kinase family	Enzymes/{ENZYME proteins/Transferases,Kinases/Tyr protein kinases}	Cytosol;Vesicles(Uncertain)	Amitriptyline (Transmembrane receptor protein tyrosine kinase activity);Imatinib (Transmembrane receptor protein tyrosine kinase activity);Regorafenib (Transmembrane receptor protein tyrosine kinase activity)	(M18895)SA TRKA RECEPTOR; (M271)PID PI3K PLC TRK PATHWAY; (M2579)ST DIFFERENTIATION PATHWAY IN PC12 CELLS		1	1	1	1	0	1	0	1	1	1	0	1	1	0	0	1	1	1	0	0	1
164832	LONRF2	1	164832	Gene_ID	H. sapiens	164832	H. sapiens	LONRF2	LON peptidase N-terminal domain and ring finger 2	GO:0032436 positive regulation of proteasomal ubiquitin-dependent protein catabolic process;GO:2000060 positive regulation of ubiquitin-dependent protein catabolic process;GO:1901800 positive regulation of proteasomal protein catabolic process			Nucleus(Supported)				0	0	1	0	0	0	0	1	0	0	0	0	0	0	0	0	0	0	0	0	1
6772	STAT1	1	6772	Gene_ID	H. sapiens	6772	H. sapiens	STAT1	signal transducer and activator of transcription 1	GO:0072308 negative regulation of metanephric nephron tubule epithelial cell differentiation;GO:0003340 negative regulation of mesenchymal to epithelial transition involved in metanephros morphogenesis;GO:0072183 negative regulation of nephron tubule epithelial cell differentiation		Transcription factors/Immunoglobulin fold	Cytosol;Nucleoplasm(Enhanced)		(M19336)ST TYPE I INTERFERON PATHWAY; (M4170)ST INTERFERON GAMMA PATHWAY; (M36)PID IL27 PATHWAY	(M5897)HALLMARK IL6 JAK STAT3 SIGNALING; (M5913)HALLMARK INTERFERON GAMMA RESPONSE; (M5950)HALLMARK ALLOGRAFT REJECTION	1	1	1	1	0	1	1	1	1	0	1	0	1	0	1	1	0	1	1	1	1
100506742	CASP12	1	100506742	Gene_ID	H. sapiens	100506742	H. sapiens	CASP12	caspase 12 (gene/pseudogene)	GO:0097194 execution phase of apoptosis;GO:0050727 regulation of inflammatory response;GO:0031347 regulation of defense response							1	1	1	0	0	1	1	0	0	0	0	0	1	0	0	0	0	0	0	0	1
2022	ENG	1	2022	Gene_ID	H. sapiens	2022	H. sapiens	ENG	endoglin	GO:1905310 regulation of cardiac neural crest cell migration involved in outflow tract morphogenesis;GO:1905007 positive regulation of epithelial to mesenchymal transition involved in endocardial cushion formation;GO:0022009 central nervous system vasculogenesis		CD markers			(M185)PID ALK1 PATHWAY; (M255)PID HIF1 TFPATHWAY	(M5896)HALLMARK TGF BETA SIGNALING; (M5953)HALLMARK KRAS SIGNALING UP	0	0	1	0	0	0	0	1	1	0	0	0	0	0	1	0	0	1	0	0	1
207	AKT1	1	207	Gene_ID	H. sapiens	207	H. sapiens	AKT1	AKT serine/threonine kinase 1	GO:0010748 negative regulation of plasma membrane long-chain fatty acid transport;GO:0100002 negative regulation of protein kinase activity by protein phosphorylation;GO:0010746 regulation of plasma membrane long-chain fatty acid transport	AGC Ser/Thr protein kinase family	Enzymes/{ENZYME proteins/Transferases,Kinases/AGC Ser/Thr protein kinases};RAS pathway related proteins	Microtubules;Nucleus(Supported)	Adenosine triphosphate (Protein serine/threonine/tyrosine kinase activity);Arsenic trioxide (Protein serine/threonine/tyrosine kinase activity);Inositol 1,3,4,5-Tetrakisphosphate (Protein serine/threonine/tyrosine kinase activity);N-[2-(5-methyl-4H-1,2,4-triazol-3-yl)phenyl]-7H-pyrrolo[2,3-d]pyrimidin-4-amine (Protein serine/threonine/tyrosine kinase activity);5-(5-chloro-7H-pyrrolo[2,3-d]pyrimid…	(M18895)SA TRKA RECEPTOR; (M12771)SA PTEN PATHWAY; (M184)PID ECADHERIN KERATINOCYTE PATHWAY	(M5908)HALLMARK ANDROGEN RESPONSE; (M5923)HALLMARK PI3K AKT MTOR SIGNALING; (M5950)HALLMARK ALLOGRAFT REJECTION	1	1	1	1	1	1	0	1	1	1	1	1	1	1	0	1	1	1	1	1	1
10153	CEBPZ	1	10153	Gene_ID	H. sapiens	10153	H. sapiens	CEBPZ	CCAAT enhancer binding protein zeta	GO:0045944 positive regulation of transcription by RNA polymerase II;GO:0045893 positive regulation of transcription, DNA-templated;GO:1903508 positive regulation of nucleic acid-templated transcription			Nucleus;Vesicles(Approved)		(M145)PID P53 DOWNSTREAM PATHWAY		0	0	0	0	0	0	0	0	0	0	0	0	1	0	0	0	0	0	0	0	1
5788	PTPRC	1	5788	Gene_ID	H. sapiens	5788	H. sapiens	PTPRC	protein tyrosine phosphatase, receptor type C	GO:0001915 negative regulation of T cell mediated cytotoxicity;GO:2000473 positive regulation of hematopoietic stem cell migration;GO:0050857 positive regulation of antigen receptor-mediated signaling pathway					(M1315)SIG PIP3 SIGNALING IN B LYMPHOCYTES; (M9526)ST T CELL SIGNAL TRANSDUCTION; (M8626)SIG BCR SIGNALING PATHWAY	(M5950)HALLMARK ALLOGRAFT REJECTION; (M5915)HALLMARK APICAL JUNCTION	1	1	0	1	0	0	0	0	1	0	1	1	1	0	1	1	0	0	0	1	1
5600	MAPK11	1	5600	Gene_ID	H. sapiens	5600	H. sapiens	MAPK11	mitogen-activated protein kinase 11	GO:2001184 positive regulation of interleukin-12 secretion;GO:0060044 negative regulation of cardiac muscle cell proliferation;GO:2001182 regulation of interleukin-12 secretion	CMGC Ser/Thr protein kinase family	Enzymes/{ENZYME proteins/Transferases,Kinases/CMGC Ser/Thr protein kinases}	Mitochondria(Approved)	KC706 (Protein serine/threonine kinase activity);Regorafenib (Protein serine/threonine kinase activity)	(M199)PID P38 MK2 PATHWAY; (M274)PID LYMPH ANGIOGENESIS PATHWAY; (M20)PID P38 MKK3 6PATHWAY	(M5915)HALLMARK APICAL JUNCTION	1	1	1	1	1	0	0	1	1	0	1	0	1	0	0	1	1	0	1	0	1
2597	GAPDH	1	2597	Gene_ID	H. sapiens	2597	H. sapiens	GAPDH	glyceraldehyde-3-phosphate dehydrogenase	GO:0052501 positive regulation by organism of apoptotic process in other organism involved in symbiotic interaction;GO:0061621 canonical glycolysis;GO:0052042 positive regulation by symbiont of host programmed cell death		Enzymes/ENZYME proteins/Oxidoreductases	Cytosol;Plasma membrane(Enhanced)	NADH (Peptidyl-cysteine s-nitrosylase activity);Adenosine-5-Diphosphoribose (Peptidyl-cysteine s-nitrosylase activity);Thionicotinamide-Adenine-Dinucleotide (Peptidyl-cysteine s-nitrosylase activity);4-(2-AMINOETHYL)BENZENESULFONYL FLUORIDE (Peptidyl-cysteine s-nitrosylase activity)	(M66)PID MYC ACTIV PATHWAY; (M5493)WNT SIGNALING	(M5924)HALLMARK MTORC1 SIGNALING; (M5891)HALLMARK HYPOXIA	0	0	1	1	1	0	1	1	1	0	0	0	1	0	1	0	0	0	1	0	1
627	BDNF	1	627	Gene_ID	H. sapiens	627	H. sapiens	BDNF	brain derived neurotrophic factor	GO:0031550 positive regulation of brain-derived neurotrophic factor receptor signaling pathway;GO:0048672 positive regulation of collateral sprouting;GO:0031548 regulation of brain-derived neurotrophic factor receptor signaling pathway			Mitochondria;Nuclear speckles(Supported)	CX717 (Neurotrophin trkb receptor binding)	(M142)PID AJDISS 2PATHWAY; (M100)PID SHP2 PATHWAY; (M187)PID TRKR PATHWAY	(M5942)HALLMARK UV RESPONSE DN; (M5930)HALLMARK EPITHELIAL MESENCHYMAL TRANSITION	0	1	1	0	0	1	1	1	1	1	0	1	0	0	0	0	0	0	0	0	1
10381	TUBB3	1	10381	Gene_ID	H. sapiens	10381	H. sapiens	TUBB3	tubulin beta 3 class III	GO:0007411 axon guidance;GO:0097485 neuron projection guidance;GO:0007409 axonogenesis				Epothilone D (Structural constituent of cytoskeleton);Epothilone B (Structural constituent of cytoskeleton);Ixabepilone (Structural constituent of cytoskeleton);CYT997 (Structural constituent of cytoskeleton);ZEN-012 (Structural constituent of cytoskeleton)			0	1	0	1	0	1	0	0	0	1	0	0	0	0	0	0	1	0	0	0	1
596	BCL2	1	596	Gene_ID	H. sapiens	596	H. sapiens	BCL2	BCL2, apoptosis regulator	GO:0032848 negative regulation of cellular pH reduction;GO:0043375 CD8-positive, alpha-beta T cell lineage commitment;GO:1900740 positive regulation of protein insertion into mitochondrial membrane involved in apoptotic signaling pathway			Nuclear membrane(Supported)Nucleoplasm(Approved)	Ibuprofen (Ubiquitin protein ligase binding);Paclitaxel (Ubiquitin protein ligase binding);Docetaxel (Ubiquitin protein ligase binding);Rasagiline (Ubiquitin protein ligase binding);E7389 (Ubiquitin protein ligase binding);S-8184 (Ubiquitin protein ligase binding);DHA-paclitaxel (Ubiquitin protein ligase binding);ABT-263 (Ubiquitin protein ligase binding);Venetoclax (Ubiquitin protein ligase bind…	(M5060)SA FAS SIGNALING; (M13096)SA PROGRAMMED CELL DEATH; (M162)PID RXR VDR PATHWAY	(M5947)HALLMARK IL2 STAT5 SIGNALING; (M5907)HALLMARK ESTROGEN RESPONSE LATE; (M5906)HALLMARK ESTROGEN RESPONSE EARLY	1	1	1	1	0	1	1	1	1	1	1	1	1	1	1	1	0	0	1	0	1
9537	TP53I11	1	9537	Gene_ID	H. sapiens	9537	H. sapiens	TP53I11	tumor protein p53 inducible protein 11	GO:0008285 negative regulation of cell proliferation;GO:0042127 regulation of cell proliferation;GO:0008283 cell proliferation			Endoplasmic reticulum;Golgi apparatus(Supported)				0	0	0	0	0	0	0	0	0	0	0	0	1	0	0	0	0	0	0	0	1
572	BAD	1	572	Gene_ID	H. sapiens	572	H. sapiens	BAD	BCL2 associated agonist of cell death	GO:0060139 positive regulation of apoptotic process by virus;GO:0052151 positive regulation by symbiont of host apoptotic process;GO:0019050 suppression by virus of host apoptotic process		RAS pathway related proteins	Mitochondria(Enhanced)	ABT-263 (Protein kinase binding)	(M13096)SA PROGRAMMED CELL DEATH; (M1718)SIG IL4RECEPTOR IN B LYPHOCYTES; (M125)PID IGF1 PATHWAY		1	1	1	1	0	1	1	1	1	0	1	1	0	1	1	1	0	1	1	0	1
5294	PIK3CG	1	5294	Gene_ID	H. sapiens	5294	H. sapiens	PIK3CG	phosphatidylinositol-4,5-bisphosphate 3-kinase catalytic subunit gamma	GO:0010897 negative regulation of triglyceride catabolic process;GO:0055118 negative regulation of cardiac muscle contraction;GO:0090209 negative regulation of triglyceride metabolic process	Atypical: PI3/PI4-kinase family	Enzymes/{ENZYME proteins/Transferases,Kinases/Atypical kinases}	Plasma membrane(Supported)	Staurosporine (Protein serine/threonine kinase activity);Myricetin (Protein serine/threonine kinase activity);2-(4-Morpholinyl)-8-Phenyl-4h-1-Benzopyran-4-One (Protein serine/threonine kinase activity);Quercetin (Protein serine/threonine kinase activity);5-QUINOXALIN-6-YLMETHYLENE-THIAZOLIDINE-2,4-DIONE (Protein serine/threonine kinase activity);XL765 (Protein serine/threonine kinase activity);2-…	(M252)PID IL8 CXCR1 PATHWAY; (M210)PID IL8 CXCR2 PATHWAY; (M177)PID EPHA FWDPATHWAY	(M5921)HALLMARK COMPLEMENT	1	1	0	1	0	1	0	1	0	1	1	0	0	0	0	0	0	1	1	1	1
57110	HRASLS	1	57110	Gene_ID	H. sapiens	57110	H. sapiens	HRASLS	HRAS like suppressor	GO:0016042 lipid catabolic process;GO:0006629 lipid metabolic process;GO:1901575 organic substance catabolic process			Cytosol;Focal adhesion sites(Approved)				0	0	0	1	0	0	0	1	0	0	0	0	0	0	0	0	0	0	0	0	1
5293	PIK3CD	1	5293	Gene_ID	H. sapiens	5293	H. sapiens	PIK3CD	phosphatidylinositol-4,5-bisphosphate 3-kinase catalytic subunit delta	GO:0033031 positive regulation of neutrophil apoptotic process;GO:0033029 regulation of neutrophil apoptotic process;GO:0035754 B cell chemotaxis		Enzymes/ENZYME proteins/Transferases;RAS pathway related proteins	Cytokinetic bridge;Vesicles(Approved)	Caffeine (Phosphatidylinositol-4,5-bisphosphate 3-kinase activity);XL765 (Phosphatidylinositol-4,5-bisphosphate 3-kinase activity);2-((9H-PURIN-6-YLTHIO)METHYL)-5-CHLORO-3-(2-METHOXYPHENYL)QUINAZOLIN-4(3H)-ONE (Phosphatidylinositol-4,5-bisphosphate 3-kinase activity)	(M18895)SA TRKA RECEPTOR; (M12771)SA PTEN PATHWAY; (M1718)SIG IL4RECEPTOR IN B LYPHOCYTES	(M5942)HALLMARK UV RESPONSE DN	1	1	1	1	1	1	0	1	1	1	1	0	1	0	0	1	0	0	1	1	1
5290	PIK3CA	1	5290	Gene_ID	H. sapiens	5290	H. sapiens	PIK3CA	phosphatidylinositol-4,5-bisphosphate 3-kinase catalytic subunit alpha	GO:0044029 hypomethylation of CpG island;GO:0044028 DNA hypomethylation;GO:0038028 insulin receptor signaling pathway via phosphatidylinositol 3-kinase	Atypical: PI3/PI4-kinase family	Enzymes/{ENZYME proteins/Transferases,Kinases/Atypical kinases};RAS pathway related proteins	Cytosol(Approved)	Caffeine (Protein serine/threonine kinase activity);XL147 (Protein serine/threonine kinase activity);XL765 (Protein serine/threonine kinase activity);(1S,6BR,9AS,11R,11BR)-9A,11B-DIMETHYL-1-[(METHYLOXY)METHYL]-3,6,9-TRIOXO-1,6,6B,7,8,9,9A,10,11,11B-DECAHYDRO-3H-FURO[4,3,2-DE]INDENO[4,5-H][2]BENZOPYRAN-11-YL ACETATE (Protein serine/threonine kinase activity)	(M135)PID IL5 PATHWAY; (M26)PID NFKAPPAB ATYPICAL PATHWAY; (M18895)SA TRKA RECEPTOR	(M5921)HALLMARK COMPLEMENT	1	1	1	1	1	1	0	1	1	1	1	1	0	1	0	0	1	1	0	1	1
60	ACTB	1	60	Gene_ID	H. sapiens	60	H. sapiens	ACTB	actin beta	GO:0072749 cellular response to cytochalasin B;GO:1901328 response to cytochalasin B;GO:0098974 postsynaptic actin cytoskeleton organization					(M5493)WNT SIGNALING	(M5915)HALLMARK APICAL JUNCTION	1	1	0	1	1	1	1	0	1	0	1	0	0	1	0	0	1	0	0	0	1
84640	USP38	1	84640	Gene_ID	H. sapiens	84640	H. sapiens	USP38	ubiquitin specific peptidase 38	GO:0016579 protein deubiquitination;GO:0006511 ubiquitin-dependent protein catabolic process;GO:0070646 protein modification by small protein removal		Enzymes/{ENZYME proteins/Hydrolases,Peptidases/Cysteine-type peptidases}	Cytosol;Nucleoplasm(Approved)				0	0	0	0	0	0	0	0	0	0	0	0	0	0	0	0	0	0	0	0	1
5603	MAPK13	1	5603	Gene_ID	H. sapiens	5603	H. sapiens	MAPK13	mitogen-activated protein kinase 13	GO:0032755 positive regulation of interleukin-6 production;GO:0048010 vascular endothelial growth factor receptor signaling pathway;GO:0050729 positive regulation of inflammatory response	CMGC Ser/Thr protein kinase family	Enzymes/{ENZYME proteins/Transferases,Kinases/CMGC Ser/Thr protein kinases}	Cytosol;Nucleoli;Nucleus(Approved)	KC706 (Protein serine/threonine kinase activity)	(M209)PID P38 GAMMA DELTA PATHWAY; (M12705)SIG CD40PATHWAYMAP; (M12012)ST P38 MAPK PATHWAY	(M5915)HALLMARK APICAL JUNCTION; (M5907)HALLMARK ESTROGEN RESPONSE LATE	1	1	0	0	1	0	0	0	0	0	0	0	0	1	0	0	0	0	1	0	1
843	CASP10	1	843	Gene_ID	H. sapiens	843	H. sapiens	CASP10	caspase 10	GO:0043123 positive regulation of I-kappaB kinase/NF-kappaB signaling;GO:0097194 execution phase of apoptosis;GO:0043122 regulation of I-kappaB kinase/NF-kappaB signaling		Enzymes/{ENZYME proteins/Hydrolases,Peptidases/Cysteine-type peptidases}	Golgi apparatus;Vesicles(Approved)		(M7997)SA CASPASE CASCADE; (M79)PID TRAIL PATHWAY; (M94)PID FAS PATHWAY	(M5921)HALLMARK COMPLEMENT	1	1	1	0	0	0	1	0	0	0	1	0	1	0	0	0	0	0	0	0	1
5602	MAPK10	1	5602	Gene_ID	H. sapiens	5602	H. sapiens	MAPK10	mitogen-activated protein kinase 10	GO:0007258 JUN phosphorylation;GO:0000187 activation of MAPK activity;GO:0038095 Fc-epsilon receptor signaling pathway	CMGC Ser/Thr protein kinase family	Enzymes/{ENZYME proteins/Transferases,Kinases/CMGC Ser/Thr protein kinases};RAS pathway related proteins		2,6-Dihydroanthra/1,9-Cd/Pyrazol-6-One (Map kinase kinase activity);Cyclohexyl-{4-[5-(3,4-Dichlorophenyl)-2-Piperidin-4-Yl-3-Propyl-3h-Imidazol-4-Yl]-Pyrimidin-2-Yl}Amine (Map kinase kinase activity);Cyclopropyl-{4-[5-(3,4-Dichlorophenyl)-2-[(1-Methyl)-Piperidin]-4-Yl-3-Propyl-3h-Imidazol-4-Yl]-Pyrimidin-2-Yl}Amine (Map kinase kinase activity);9-(4-Hydroxyphenyl)-2,7-Phenanthroline (Map kinase ki…	(M7871)ST GRANULE CELL SURVIVAL PATHWAY; (M193)PID NEPHRIN NEPH1 PATHWAY; (M45)PID CD40 PATHWAY	(M5923)HALLMARK PI3K AKT MTOR SIGNALING	1	1	1	1	1	1	1	1	1	1	1	1	1	0	0	0	1	0	0	1	1
55811	ADCY10	1	55811	Gene_ID	H. sapiens	55811	H. sapiens	ADCY10	adenylate cyclase 10	GO:0006171 cAMP biosynthetic process;GO:0003351 epithelial cilium movement;GO:0052652 cyclic purine nucleotide metabolic process		Enzymes/ENZYME proteins/Lyases					0	0	1	1	0	1	0	0	1	0	0	0	0	0	0	0	0	0	0	0	1
836	CASP3	1	836	Gene_ID	H. sapiens	836	H. sapiens	CASP3	caspase 3	GO:0008635 activation of cysteine-type endopeptidase activity involved in apoptotic process by cytochrome c;GO:0046007 negative regulation of activated T cell proliferation;GO:0072734 cellular response to staurosporine		Enzymes/{ENZYME proteins/Hydrolases,Peptidases/Cysteine-type peptidases}	Mitochondria;Nucleoplasm(Supported)	Minocycline (Phospholipase a2 activator activity);5-[4-(1-Carboxymethyl-2-Oxo-Propylcarbamoyl)-Benzylsulfamoyl]-2-Hydroxy-Benzoic Acid (Phospholipase a2 activator activity);IDN-6556 (Phospholipase a2 activator activity);2-HYDROXY-5-(2-MERCAPTO-ETHYLSULFAMOYL)-BENZOIC ACID (Phospholipase a2 activator activity);methyl (3S)-3-[(tert-butoxycarbonyl)amino]-4-oxopentanoate (Phospholipase a2 activator a…	(M5060)SA FAS SIGNALING; (M7997)SA CASPASE CASCADE; (M7871)ST GRANULE CELL SURVIVAL PATHWAY	(M5941)HALLMARK UV RESPONSE UP; (M5902)HALLMARK APOPTOSIS; (M5921)HALLMARK COMPLEMENT	1	1	1	1	1	1	1	1	1	1	1	1	1	1	1	1	0	1	0	0	1
1813	DRD2	1	1813	Gene_ID	H. sapiens	1813	H. sapiens	DRD2	dopamine receptor D2	GO:0021853 cerebral cortex GABAergic interneuron migration;GO:0051586 positive regulation of dopamine uptake involved in synaptic transmission;GO:1900168 positive regulation of glial cell-derived neurotrophic factor secretion		G-protein coupled receptors/GPCRs excl olfactory receptors;Transporters		Amphetamine (Potassium channel regulator activity);Ziprasidone (Potassium channel regulator activity);Cabergoline (Potassium channel regulator activity);Ropinirole (Potassium channel regulator activity);Olanzapine (Potassium channel regulator activity);Clozapine (Potassium channel regulator activity);Mirtazapine (Potassium channel regulator activity);Thiethylperazine (Potassium channel regulator …	(M18342)ST G ALPHA I PATHWAY		0	1	1	1	1	1	1	1	1	1	1	1	1	1	0	0	0	0	1	0	1
7157	TP53	1	7157	Gene_ID	H. sapiens	7157	H. sapiens	TP53	tumor protein p53	GO:1900740 positive regulation of protein insertion into mitochondrial membrane involved in apoptotic signaling pathway;GO:1900739 regulation of protein insertion into mitochondrial membrane involved in apoptotic signaling pathway;GO:1901030 positive regulation of mitochondrial outer membrane permeabilization involved in apoptotic signaling pathway		Transcription factors/Immunoglobulin fold;Transporters/Transporter channels and pores	Nucleoplasm(Enhanced)	Acetylsalicylic acid;AZD 3355;1-(9-ethyl-9H-carbazol-3-yl)-N-methylmethanamine	(M1529)SA G1 AND S PHASES; (M180)PID HIF1A PATHWAY; (M32)PID HDAC CLASSIII PATHWAY	(M5895)HALLMARK WNT BETA CATENIN SIGNALING; (M5898)HALLMARK DNA REPAIR; (M5925)HALLMARK E2F TARGETS	1	1	1	1	1	1	1	1	1	0	1	1	1	0	0	1	1	0	1	1	1
79923	NANOG	1	79923	Gene_ID	H. sapiens	79923	H. sapiens	NANOG	Nanog homeobox	GO:0001714 endodermal cell fate specification;GO:0001711 endodermal cell fate commitment;GO:0035987 endodermal cell differentiation		Transcription factors/Helix-turn-helix domains					1	1	0	0	1	0	0	0	0	0	0	0	0	0	0	0	0	0	0	0	1
5566	PRKACA	1	5566	Gene_ID	H. sapiens	5566	H. sapiens	PRKACA	protein kinase cAMP-activated catalytic subunit alpha	GO:0010881 regulation of cardiac muscle contraction by regulation of the release of sequestered calcium ion;GO:0010880 regulation of release of sequestered calcium ion into cytosol by sarcoplasmic reticulum;GO:0060314 regulation of ryanodine-sensitive calcium-release channel activity	AGC Ser/Thr protein kinase family	Enzymes/{ENZYME proteins/Transferases,Kinases/AGC Ser/Thr protein kinases};RAS pathway related proteins	Cytosol(Approved)	Pentanal (Ubiquitin protein ligase binding);Balanol Analog 2 (Ubiquitin protein ligase binding);Balanol Analog 8 (Ubiquitin protein ligase binding);Phosphonothreonine (Ubiquitin protein ligase binding);Balanol Analog 1 (Ubiquitin protein ligase binding);3,5-Diiodotyrosine (Ubiquitin protein ligase binding);Balanol (Ubiquitin protein ligase binding);Phosphonoserine (Ubiquitin protein ligase bindin…	(M56)PID LPA4 PATHWAY; (M226)PID VEGFR1 PATHWAY; (M182)PID IL3 PATHWAY	(M5941)HALLMARK UV RESPONSE UP	1	1	1	1	1	1	1	1	0	0	1	1	1	1	0	0	1	0	0	0	1
7070	THY1	1	7070	Gene_ID	H. sapiens	7070	H. sapiens	THY1	Thy-1 cell surface antigen	GO:0051281 positive regulation of release of sequestered calcium ion into cytosol;GO:0051279 regulation of release of sequestered calcium ion into cytosol;GO:0050860 negative regulation of T cell receptor signaling pathway		CD markers	Nucleus;Plasma membrane(Approved)		(M169)PID INTEGRIN2 PATHWAY; (M159)PID AMB2 NEUTROPHILS PATHWAY; (M53)PID INTEGRIN3 PATHWAY	(M5919)HALLMARK HEDGEHOG SIGNALING; (M5916)HALLMARK APICAL SURFACE; (M5950)HALLMARK ALLOGRAFT REJECTION	0	1	1	0	0	0	0	0	1	1	1	0	0	0	0	1	0	1	0	1	1
43	ACHE	1	43	Gene_ID	H. sapiens	43	H. sapiens	ACHE	acetylcholinesterase (Cartwright blood group)	GO:0032223 negative regulation of synaptic transmission, cholinergic;GO:0001507 acetylcholine catabolic process in synaptic cleft;GO:0045212 neurotransmitter receptor biosynthetic process		Blood group antigen proteins;Enzymes/ENZYME proteins/Hydrolases	Golgi apparatus;Vesicles(Approved)	Choline (Serine hydrolase activity);Tacrine (Serine hydrolase activity);Dipivefrin (Serine hydrolase activity);Gallamine Triethiodide (Serine hydrolase activity);Pyridostigmine (Serine hydrolase activity);Galantamine (Serine hydrolase activity);Isoflurophate (Serine hydrolase activity);Pralidoxime (Serine hydrolase activity);Minaprine (Serine hydrolase activity);Donepezil (Serine hydrolase activi…	(M166)PID ATF2 PATHWAY	(M5919)HALLMARK HEDGEHOG SIGNALING; (M5909)HALLMARK MYOGENESIS; (M5950)HALLMARK ALLOGRAFT REJECTION	0	1	0	1	1	1	0	1	0	0	0	0	0	0	0	0	0	0	1	0	1
4907	NT5E	1	4907	Gene_ID	H. sapiens	4907	H. sapiens	NT5E	5'-nucleotidase ecto	GO:0006196 AMP catabolic process;GO:0046086 adenosine biosynthetic process;GO:0009169 purine ribonucleoside monophosphate catabolic process		CD markers;Enzymes/ENZYME proteins/Hydrolases	Plasma membrane(Supported)Cytosol;Nucleoplasm(Approved)	Pentoxifylline (Nucleotide binding)	(M255)PID HIF1 TFPATHWAY	(M5947)HALLMARK IL2 STAT5 SIGNALING; (M5930)HALLMARK EPITHELIAL MESENCHYMAL TRANSITION; (M5937)HALLMARK GLYCOLYSIS	0	0	0	0	0	0	0	0	0	0	0	1	0	0	0	0	0	0	1	0	1
10763	NES	1	10763	Gene_ID	H. sapiens	10763	H. sapiens	NES	nestin	GO:0030844 positive regulation of intermediate filament depolymerization;GO:0030842 regulation of intermediate filament depolymerization;GO:0045106 intermediate filament depolymerization			Intermediate filaments(Enhanced)				0	0	1	0	1	0	0	0	0	0	0	0	1	1	0	0	1	0	0	0	1
5906	RAP1A	1	5906	Gene_ID	H. sapiens	5906	H. sapiens	RAP1A	RAP1A, member of RAS oncogene family	GO:1905451 positive regulation of Fc-gamma receptor signaling pathway involved in phagocytosis;GO:1905449 regulation of Fc-gamma receptor signaling pathway involved in phagocytosis;GO:0060369 positive regulation of Fc receptor mediated stimulatory signaling pathway		RAS pathway related proteins			(M69)PID REELIN PATHWAY; (M72)PID NECTIN PATHWAY; (M4910)ST ERK1 ERK2 MAPK PATHWAY		0	1	1	1	0	1	0	1	1	0	1	1	0	1	0	0	1	1	1	1	1
1385	CREB1	1	1385	Gene_ID	H. sapiens	1385	H. sapiens	CREB1	cAMP responsive element binding protein 1	GO:0032916 positive regulation of transforming growth factor beta3 production;GO:1900273 positive regulation of long-term synaptic potentiation;GO:0060509 Type I pneumocyte differentiation		Transcription factors/Basic domains	Nucleoplasm(Enhanced)	Adenosine monophosphate (Transcriptional activator activity, rna polymerase ii transcription factor binding);Naloxone (Transcriptional activator activity, rna polymerase ii transcription factor binding)	(M56)PID LPA4 PATHWAY; (M14775)ST G ALPHA S PATHWAY; (M199)PID P38 MK2 PATHWAY		1	1	1	1	1	1	1	1	1	1	1	1	0	1	0	1	0	1	1	0	1

## Sheet: Enrichment
GroupID	Category	Term	Description	LogP	Log(q-value)	InTerm_InList	Genes	Symbols
1_Summary	KEGG Pathway	hsa05210	Colorectal cancer	-25.7604	-21.4622	15/60	207,572,581,596,836,842,1499,2932,4609,5290,5293,5594,5602,7157,54205,60,841,843,4914,10018,100506742,1385,6772,107,2475,5566,1432,5600,5603,5294,6657,79923,5788,23411	AKT1,BAD,BAX,BCL2,CASP3,CASP9,CTNNB1,GSK3B,MYC,PIK3CA,PIK3CD,MAPK1,MAPK10,TP53,CYCS,ACTB,CASP8,CASP10,NTRK1,BCL2L11,CASP12,CREB1,STAT1,ADCY1,MTOR,PRKACA,MAPK14,MAPK11,MAPK13,PIK3CG,SOX2,NANOG,PTPRC,SIRT1
1_Member	KEGG Pathway	hsa05210	Colorectal cancer	-25.7604	-21.4622	15/60	207,572,581,596,836,842,1499,2932,4609,5290,5293,5594,5602,7157,54205	AKT1,BAD,BAX,BCL2,CASP3,CASP9,CTNNB1,GSK3B,MYC,PIK3CA,PIK3CD,MAPK1,MAPK10,TP53,CYCS
1_Member	KEGG Pathway	hsa04210	Apoptosis	-25.4615	-21.4622	18/138	60,207,572,581,596,836,841,842,843,4914,5290,5293,5594,5602,7157,10018,54205,100506742	ACTB,AKT1,BAD,BAX,BCL2,CASP3,CASP8,CASP9,CASP10,NTRK1,PIK3CA,PIK3CD,MAPK1,MAPK10,TP53,BCL2L11,CYCS,CASP12
1_Member	KEGG Pathway	hsa05161	Hepatitis B	-25.1115	-21.2883	18/144	207,572,581,596,836,841,842,843,1385,4609,5290,5293,5594,5602,6772,7157,54205,100506742	AKT1,BAD,BAX,BCL2,CASP3,CASP8,CASP9,CASP10,CREB1,MYC,PIK3CA,PIK3CD,MAPK1,MAPK10,STAT1,TP53,CYCS,CASP12
1_Member	KEGG Pathway	hsa05200	Pathways in cancer	-21.4825	-17.9603	21/395	107,207,572,581,596,836,841,842,1499,2475,2932,4609,4914,5290,5293,5566,5594,5602,6772,7157,54205	ADCY1,AKT1,BAD,BAX,BCL2,CASP3,CASP8,CASP9,CTNNB1,MTOR,GSK3B,MYC,NTRK1,PIK3CA,PIK3CD,PRKACA,MAPK1,MAPK10,STAT1,TP53,CYCS
1_Member	KEGG Pathway	hsa05152	Tuberculosis	-19.8546	-16.4574	16/179	207,572,581,596,836,841,842,843,1385,1432,5594,5600,5602,5603,6772,54205	AKT1,BAD,BAX,BCL2,CASP3,CASP8,CASP9,CASP10,CREB1,MAPK14,MAPK1,MAPK11,MAPK10,MAPK13,STAT1,CYCS
1_Member	KEGG Pathway	hsa05145	Toxoplasmosis	-19.4038	-16.1034	14/113	207,572,596,836,841,842,1432,5294,5594,5600,5602,5603,6772,54205	AKT1,BAD,BCL2,CASP3,CASP8,CASP9,MAPK14,PIK3CG,MAPK1,MAPK11,MAPK10,MAPK13,STAT1,CYCS
1_Member	KEGG Pathway	hsa01524	Platinum drug resistance	-18.1954	-14.9742	12/73	207,572,581,596,836,841,842,5290,5293,5594,7157,54205	AKT1,BAD,BAX,BCL2,CASP3,CASP8,CASP9,PIK3CA,PIK3CD,MAPK1,TP53,CYCS
1_Member	KEGG Pathway	hsa05014	Amyotrophic lateral sclerosis (ALS)	-18.102	-14.9415	11/51	572,581,596,836,842,1432,5600,5603,7157,54205,100506742	BAD,BAX,BCL2,CASP3,CASP9,MAPK14,MAPK11,MAPK13,TP53,CYCS,CASP12
1_Member	Reactome Gene Sets	R-HSA-449147	Signaling by Interleukins	-13.2799	-10.6328	16/464	207,596,836,1385,1432,4609,5290,5293,5566,5594,5600,5602,6657,6772,7157,79923	AKT1,BCL2,CASP3,CREB1,MAPK14,MYC,PIK3CA,PIK3CD,PRKACA,MAPK1,MAPK11,MAPK10,SOX2,STAT1,TP53,NANOG
1_Member	KEGG Pathway	hsa04932	Non-alcoholic fatty liver disease (NAFLD)	-11.1754	-8.8045	10/149	207,581,836,841,2932,5290,5293,5602,10018,54205	AKT1,BAX,CASP3,CASP8,GSK3B,PIK3CA,PIK3CD,MAPK10,BCL2L11,CYCS
1_Member	Reactome Gene Sets	R-HSA-1280215	Cytokine Signaling in Immune system	-10.6787	-8.38698	16/689	207,596,836,1385,1432,4609,5290,5293,5566,5594,5600,5602,6657,6772,7157,79923	AKT1,BCL2,CASP3,CREB1,MAPK14,MYC,PIK3CA,PIK3CD,PRKACA,MAPK1,MAPK11,MAPK10,SOX2,STAT1,TP53,NANOG
1_Member	KEGG Pathway	hsa05222	Small cell lung cancer	-10.2378	-8.01298	8/84	207,596,842,4609,5290,5293,7157,54205	AKT1,BCL2,CASP9,MYC,PIK3CA,PIK3CD,TP53,CYCS
1_Member	GO Biological Processes	GO:0019221	cytokine-mediated signaling pathway	-8.77683	-6.75063	15/793	207,572,596,836,841,4609,5290,5293,5566,5788,6657,6772,7157,23411,79923	AKT1,BAD,BCL2,CASP3,CASP8,MYC,PIK3CA,PIK3CD,PRKACA,PTPRC,SOX2,STAT1,TP53,SIRT1,NANOG
1_Member	Reactome Gene Sets	R-HSA-6785807	Interleukin-4 and 13 signaling	-7.82595	-5.91119	7/108	207,596,4609,6657,6772,7157,79923	AKT1,BCL2,MYC,SOX2,STAT1,TP53,NANOG
2_Summary	KEGG Pathway	hsa04722	Neurotrophin signaling pathway	-22.8017	-19.1034	16/119	207,572,581,596,627,1432,2932,4914,5290,5293,5594,5600,5602,5603,5906,7157,107,2475,5566,1499,1813,4609,5294,5788,9314,23411,225689,60,836,79923,6772,841,843,1385,842,54205,10018,7070,100506742,43,10381,5286,6657,50674	AKT1,BAD,BAX,BCL2,BDNF,MAPK14,GSK3B,NTRK1,PIK3CA,PIK3CD,MAPK1,MAPK11,MAPK10,MAPK13,RAP1A,TP53,ADCY1,MTOR,PRKACA,CTNNB1,DRD2,MYC,PIK3CG,PTPRC,KLF4,SIRT1,MAPK15,ACTB,CASP3,NANOG,STAT1,CASP8,CASP10,CREB1,CASP9,CYCS,BCL2L11,THY1,CASP12,ACHE,TUBB3,PIK3C2A,SOX2,NEUROG3
2_Member	KEGG Pathway	hsa04722	Neurotrophin signaling pathway	-22.8017	-19.1034	16/119	207,572,581,596,627,1432,2932,4914,5290,5293,5594,5600,5602,5603,5906,7157	AKT1,BAD,BAX,BCL2,BDNF,MAPK14,GSK3B,NTRK1,PIK3CA,PIK3CD,MAPK1,MAPK11,MAPK10,MAPK13,RAP1A,TP53
2_Member	KEGG Pathway	hsa01522	Endocrine resistance	-22.399	-18.7976	15/96	107,207,572,581,596,1432,2475,5290,5293,5566,5594,5600,5602,5603,7157	ADCY1,AKT1,BAD,BAX,BCL2,MAPK14,MTOR,PIK3CA,PIK3CD,PRKACA,MAPK1,MAPK11,MAPK10,MAPK13,TP53
2_Member	GO Biological Processes	GO:0051347	positive regulation of transferase activity	-17.3645	-14.2412	21/626	107,207,572,581,1432,1499,1813,2475,4609,4914,5290,5294,5566,5594,5600,5602,5788,5906,9314,23411,225689	ADCY1,AKT1,BAD,BAX,MAPK14,CTNNB1,DRD2,MTOR,MYC,NTRK1,PIK3CA,PIK3CG,PRKACA,MAPK1,MAPK11,MAPK10,PTPRC,RAP1A,KLF4,SIRT1,MAPK15
2_Member	KEGG Pathway	hsa05205	Proteoglycans in cancer	-17.3374	-14.2412	15/203	60,207,836,1432,1499,2475,4609,5290,5293,5566,5594,5600,5603,7157,79923	ACTB,AKT1,CASP3,MAPK14,CTNNB1,MTOR,MYC,PIK3CA,PIK3CD,PRKACA,MAPK1,MAPK11,MAPK13,TP53,NANOG
2_Member	KEGG Pathway	hsa04933	AGE-RAGE signaling pathway in diabetic complications	-16.5163	-13.517	12/99	207,581,596,836,1432,5290,5293,5594,5600,5602,5603,6772	AKT1,BAX,BCL2,CASP3,MAPK14,PIK3CA,PIK3CD,MAPK1,MAPK11,MAPK10,MAPK13,STAT1
2_Member	KEGG Pathway	hsa04668	TNF signaling pathway	-16.0445	-13.1059	12/108	207,836,841,843,1385,1432,5290,5293,5594,5600,5602,5603	AKT1,CASP3,CASP8,CASP10,CREB1,MAPK14,PIK3CA,PIK3CD,MAPK1,MAPK11,MAPK10,MAPK13
2_Member	Canonical Pathways	M115	PID REG GR PATHWAY	-15.6605	-12.7581	11/82	207,581,1385,1432,2932,5566,5594,5600,5602,6772,7157	AKT1,BAX,CREB1,MAPK14,GSK3B,PRKACA,MAPK1,MAPK11,MAPK10,STAT1,TP53
2_Member	KEGG Pathway	hsa04611	Platelet activation	-15.3449	-12.4759	12/123	60,107,207,1432,5290,5293,5294,5566,5594,5600,5603,5906	ACTB,ADCY1,AKT1,MAPK14,PIK3CA,PIK3CD,PIK3CG,PRKACA,MAPK1,MAPK11,MAPK13,RAP1A
2_Member	Canonical Pathways	M94	PID FAS PATHWAY	-15.2597	-12.4065	9/38	207,836,841,843,1432,5290,5293,5600,5602	AKT1,CASP3,CASP8,CASP10,MAPK14,PIK3CA,PIK3CD,MAPK11,MAPK10
2_Member	KEGG Pathway	hsa05164	Influenza A	-15.1146	-12.2767	13/173	60,207,842,1432,2932,5290,5293,5594,5600,5602,5603,6772,54205	ACTB,AKT1,CASP9,MAPK14,GSK3B,PIK3CA,PIK3CD,MAPK1,MAPK11,MAPK10,MAPK13,STAT1,CYCS
2_Member	KEGG Pathway	hsa05160	Hepatitis C	-15.0082	-12.185	12/131	207,572,1432,2932,5290,5293,5594,5600,5602,5603,6772,7157	AKT1,BAD,MAPK14,GSK3B,PIK3CA,PIK3CD,MAPK1,MAPK11,MAPK10,MAPK13,STAT1,TP53
2_Member	KEGG Pathway	hsa04917	Prolactin signaling pathway	-14.5456	-11.7637	10/70	207,1432,2932,5290,5293,5594,5600,5602,5603,6772	AKT1,MAPK14,GSK3B,PIK3CA,PIK3CD,MAPK1,MAPK11,MAPK10,MAPK13,STAT1
2_Member	KEGG Pathway	hsa04071	Sphingolipid signaling pathway	-13.8572	-11.125	11/118	207,581,596,1432,5290,5293,5594,5600,5602,5603,7157	AKT1,BAX,BCL2,MAPK14,PIK3CA,PIK3CD,MAPK1,MAPK11,MAPK10,MAPK13,TP53
2_Member	Reactome Gene Sets	R-HSA-9006934	Signaling by Receptor Tyrosine Kinases	-13.7773	-11.0567	17/518	60,207,572,836,1385,1432,1499,2475,4914,5290,5566,5594,5600,5603,5906,6772,10018	ACTB,AKT1,BAD,CASP3,CREB1,MAPK14,CTNNB1,MTOR,NTRK1,PIK3CA,PRKACA,MAPK1,MAPK11,MAPK13,RAP1A,STAT1,BCL2L11
2_Member	KEGG Pathway	hsa04370	VEGF signaling pathway	-13.3913	-10.7142	9/59	207,572,842,1432,5290,5293,5594,5600,5603	AKT1,BAD,CASP9,MAPK14,PIK3CA,PIK3CD,MAPK1,MAPK11,MAPK13
2_Member	GO Biological Processes	GO:0033674	positive regulation of kinase activity	-13.3279	-10.671	17/552	107,207,572,581,1432,1813,2475,4914,5290,5294,5566,5594,5600,5602,5788,5906,23411	ADCY1,AKT1,BAD,BAX,MAPK14,DRD2,MTOR,NTRK1,PIK3CA,PIK3CG,PRKACA,MAPK1,MAPK11,MAPK10,PTPRC,RAP1A,SIRT1
2_Member	KEGG Pathway	hsa04914	Progesterone-mediated oocyte maturation	-13.1146	-10.477	10/96	107,207,1432,5290,5293,5566,5594,5600,5602,5603	ADCY1,AKT1,MAPK14,PIK3CA,PIK3CD,PRKACA,MAPK1,MAPK11,MAPK10,MAPK13
2_Member	KEGG Pathway	hsa05418	Fluid shear stress and atherosclerosis	-12.9574	-10.3383	11/142	60,207,596,1432,1499,5290,5293,5600,5602,5603,7157	ACTB,AKT1,BCL2,MAPK14,CTNNB1,PIK3CA,PIK3CD,MAPK11,MAPK10,MAPK13,TP53
2_Member	KEGG Pathway	hsa04010	MAPK signaling pathway	-12.9281	-10.3179	13/255	207,627,836,1432,4609,4914,5566,5594,5600,5602,5603,5906,7157	AKT1,BDNF,CASP3,MAPK14,MYC,NTRK1,PRKACA,MAPK1,MAPK11,MAPK10,MAPK13,RAP1A,TP53
2_Member	KEGG Pathway	hsa05142	Chagas disease (American trypanosomiasis)	-12.8438	-10.2424	10/102	107,207,841,1432,5290,5293,5594,5600,5602,5603	ADCY1,AKT1,CASP8,MAPK14,PIK3CA,PIK3CD,MAPK1,MAPK11,MAPK10,MAPK13
2_Member	KEGG Pathway	hsa04620	Toll-like receptor signaling pathway	-12.7573	-10.1645	10/104	207,841,1432,5290,5293,5594,5600,5602,5603,6772	AKT1,CASP8,MAPK14,PIK3CA,PIK3CD,MAPK1,MAPK11,MAPK10,MAPK13,STAT1
2_Member	KEGG Pathway	hsa05169	Epstein-Barr virus infection	-12.7058	-10.1214	12/203	207,596,1432,2932,4609,5290,5293,5566,5600,5602,5603,7157	AKT1,BCL2,MAPK14,GSK3B,MYC,PIK3CA,PIK3CD,PRKACA,MAPK11,MAPK10,MAPK13,TP53
2_Member	GO Biological Processes	GO:0045860	positive regulation of protein kinase activity	-12.5468	-10.0024	16/518	107,207,581,1432,1813,2475,4914,5290,5294,5566,5594,5600,5602,5788,5906,23411	ADCY1,AKT1,BAX,MAPK14,DRD2,MTOR,NTRK1,PIK3CA,PIK3CG,PRKACA,MAPK1,MAPK11,MAPK10,PTPRC,RAP1A,SIRT1
2_Member	KEGG Pathway	hsa04015	Rap1 signaling pathway	-12.5302	-9.9933	12/210	60,107,207,1432,1499,1813,5290,5293,5594,5600,5603,5906	ACTB,ADCY1,AKT1,MAPK14,CTNNB1,DRD2,PIK3CA,PIK3CD,MAPK1,MAPK11,MAPK13,RAP1A
2_Member	Reactome Gene Sets	R-HSA-166520	Signalling by NGF	-11.9547	-9.47384	11/175	572,836,1385,1432,4914,5290,5594,5600,5603,5906,10018	BAD,CASP3,CREB1,MAPK14,NTRK1,PIK3CA,MAPK1,MAPK11,MAPK13,RAP1A,BCL2L11
2_Member	GO Biological Processes	GO:0045859	regulation of protein kinase activity	-11.8668	-9.39248	18/795	107,207,581,836,1432,1813,2475,4914,5290,5294,5566,5594,5600,5602,5788,5906,7070,23411	ADCY1,AKT1,BAX,CASP3,MAPK14,DRD2,MTOR,NTRK1,PIK3CA,PIK3CG,PRKACA,MAPK1,MAPK11,MAPK10,PTPRC,RAP1A,THY1,SIRT1
2_Member	KEGG Pathway	hsa04380	Osteoclast differentiation	-11.7712	-9.32822	10/130	207,1385,1432,5290,5293,5594,5600,5602,5603,6772	AKT1,CREB1,MAPK14,PIK3CA,PIK3CD,MAPK1,MAPK11,MAPK10,MAPK13,STAT1
2_Member	KEGG Pathway	hsa04068	FoxO signaling pathway	-11.7043	-9.26727	10/132	207,1432,5290,5293,5594,5600,5602,5603,10018,23411	AKT1,MAPK14,PIK3CA,PIK3CD,MAPK1,MAPK11,MAPK10,MAPK13,BCL2L11,SIRT1
2_Member	KEGG Pathway	hsa04657	IL-17 signaling pathway	-11.5375	-9.11225	9/93	836,841,1432,2932,5594,5600,5602,5603,225689	CASP3,CASP8,MAPK14,GSK3B,MAPK1,MAPK11,MAPK10,MAPK13,MAPK15
2_Member	Canonical Pathways	M12705	SIG CD40PATHWAYMAP	-11.4743	-9.05475	7/34	1432,5290,5293,5594,5600,5602,5603	MAPK14,PIK3CA,PIK3CD,MAPK1,MAPK11,MAPK10,MAPK13
2_Member	KEGG Pathway	hsa04750	Inflammatory mediator regulation of TRP channels	-11.3691	-8.95525	9/97	107,1432,4914,5290,5293,5566,5600,5602,5603	ADCY1,MAPK14,NTRK1,PIK3CA,PIK3CD,PRKACA,MAPK11,MAPK10,MAPK13
2_Member	KEGG Pathway	hsa04261	Adrenergic signaling in cardiomyocytes	-11.324	-8.92677	10/144	107,207,596,1385,1432,5294,5566,5594,5600,5603	ADCY1,AKT1,BCL2,CREB1,MAPK14,PIK3CG,PRKACA,MAPK1,MAPK11,MAPK13
2_Member	Reactome Gene Sets	R-HSA-4420097	VEGFA-VEGFR2 Pathway	-11.2877	-8.89579	9/99	60,207,1432,1499,2475,5290,5566,5600,5603	ACTB,AKT1,MAPK14,CTNNB1,MTOR,PIK3CA,PRKACA,MAPK11,MAPK13
2_Member	KEGG Pathway	hsa04660	T cell receptor signaling pathway	-11.1299	-8.77402	9/103	207,1432,2932,5290,5293,5594,5600,5603,5788	AKT1,MAPK14,GSK3B,PIK3CA,PIK3CD,MAPK1,MAPK11,MAPK13,PTPRC
2_Member	KEGG Pathway	hsa04664	Fc epsilon RI signaling pathway	-10.9942	-8.64807	8/68	207,1432,5290,5293,5594,5600,5602,5603	AKT1,MAPK14,PIK3CA,PIK3CD,MAPK1,MAPK11,MAPK10,MAPK13
2_Member	Reactome Gene Sets	R-HSA-194138	Signaling by VEGF	-10.9785	-8.63951	9/107	60,207,1432,1499,2475,5290,5566,5600,5603	ACTB,AKT1,MAPK14,CTNNB1,MTOR,PIK3CA,PRKACA,MAPK11,MAPK13
2_Member	KEGG Pathway	hsa04670	Leukocyte transendothelial migration	-10.7276	-8.42723	9/114	60,1432,1499,5290,5293,5600,5603,5906,7070	ACTB,MAPK14,CTNNB1,PIK3CA,PIK3CD,MAPK11,MAPK13,RAP1A,THY1
2_Member	Canonical Pathways	M222	PID CXCR3 PATHWAY	-10.7049	-8.40889	7/43	207,1432,2475,5290,5293,5594,5600	AKT1,MAPK14,MTOR,PIK3CA,PIK3CD,MAPK1,MAPK11
2_Member	Reactome Gene Sets	R-HSA-187037	NGF signalling via TRKA from the plasma membrane	-10.5018	-8.23081	8/78	1385,1432,4914,5290,5594,5600,5603,5906	CREB1,MAPK14,NTRK1,PIK3CA,MAPK1,MAPK11,MAPK13,RAP1A
2_Member	GO Biological Processes	GO:0032147	activation of protein kinase activity	-10.3501	-8.09896	12/322	107,207,1432,1813,2475,4914,5290,5566,5594,5600,5602,5906	ADCY1,AKT1,MAPK14,DRD2,MTOR,NTRK1,PIK3CA,PRKACA,MAPK1,MAPK11,MAPK10,RAP1A
2_Member	Canonical Pathways	M274	PID LYMPH ANGIOGENESIS PATHWAY	-10.3292	-8.08576	6/25	207,1385,1432,5290,5594,5600	AKT1,CREB1,MAPK14,PIK3CA,MAPK1,MAPK11
2_Member	KEGG Pathway	hsa04728	Dopaminergic synapse	-10.2107	-7.98955	9/130	207,1385,1432,1813,2932,5566,5600,5602,5603	AKT1,CREB1,MAPK14,DRD2,GSK3B,PRKACA,MAPK11,MAPK10,MAPK13
2_Member	Canonical Pathways	M122	PID IL2 1PATHWAY	-9.9165	-7.74	7/55	596,1432,4609,5290,5594,5600,6772	BCL2,MAPK14,MYC,PIK3CA,MAPK1,MAPK11,STAT1
2_Member	Canonical Pathways	M12012	ST P38 MAPK PATHWAY	-9.22176	-7.13359	6/37	207,1385,1432,5594,5600,5603	AKT1,CREB1,MAPK14,MAPK1,MAPK11,MAPK13
2_Member	Canonical Pathways	M237	PID VEGFR1 2 PATHWAY	-9.20339	-7.11788	7/69	207,1432,1499,5290,5566,5594,5600	AKT1,MAPK14,CTNNB1,PIK3CA,PRKACA,MAPK1,MAPK11
2_Member	KEGG Pathway	hsa04621	NOD-like receptor signaling pathway	-9.16827	-7.09836	9/170	596,841,1432,5594,5600,5602,5603,6772,100506742	BCL2,CASP8,MAPK14,MAPK1,MAPK11,MAPK10,MAPK13,STAT1,CASP12
2_Member	Canonical Pathways	M183	PID IL6 7 PATHWAY	-8.56617	-6.55807	6/47	207,1432,4609,5290,5600,6772	AKT1,MAPK14,MYC,PIK3CA,MAPK11,STAT1
2_Member	GO Biological Processes	GO:0018105	peptidyl-serine phosphorylation	-8.37046	-6.3733	10/288	207,581,596,1432,2475,2932,5290,5566,5594,5603	AKT1,BAX,BCL2,MAPK14,MTOR,GSK3B,PIK3CA,PRKACA,MAPK1,MAPK13
2_Member	KEGG Pathway	hsa04912	GnRH signaling pathway	-8.31443	-6.32371	7/92	107,1432,5566,5594,5600,5602,5603	ADCY1,MAPK14,PRKACA,MAPK1,MAPK11,MAPK10,MAPK13
2_Member	Reactome Gene Sets	R-HSA-168643	Nucleotide-binding domain, leucine rich repeat containing receptor (NLR) signaling pathways	-8.29279	-6.3063	6/52	596,841,842,1432,5600,5603	BCL2,CASP8,CASP9,MAPK14,MAPK11,MAPK13
2_Member	GO Biological Processes	GO:0018209	peptidyl-serine modification	-8.10549	-6.14159	10/307	207,581,596,1432,2475,2932,5290,5566,5594,5603	AKT1,BAX,BCL2,MAPK14,MTOR,GSK3B,PIK3CA,PRKACA,MAPK1,MAPK13
2_Member	KEGG Pathway	hsa04723	Retrograde endocannabinoid signaling	-8.0295	-6.08325	7/101	107,1432,5566,5594,5600,5602,5603	ADCY1,MAPK14,PRKACA,MAPK1,MAPK11,MAPK10,MAPK13
2_Member	Reactome Gene Sets	R-HSA-450341	Activation of the AP-1 family of transcription factors	-8.02628	-6.08195	4/10	1432,5594,5600,5602	MAPK14,MAPK1,MAPK11,MAPK10
2_Member	Canonical Pathways	M166	PID ATF2 PATHWAY	-7.95402	-6.02102	6/59	43,596,1385,1432,5594,5600	ACHE,BCL2,CREB1,MAPK14,MAPK1,MAPK11
2_Member	KEGG Pathway	hsa04659	Th17 cell differentiation	-7.85415	-5.93761	7/107	1432,2475,5594,5600,5602,5603,6772	MAPK14,MTOR,MAPK1,MAPK11,MAPK10,MAPK13,STAT1
2_Member	Reactome Gene Sets	R-HSA-187687	Signalling to ERKs	-7.74075	-5.84863	5/31	1432,4914,5600,5603,5906	MAPK14,NTRK1,MAPK11,MAPK13,RAP1A
2_Member	Reactome Gene Sets	R-HSA-450282	MAPK targets/ Nuclear events mediated by MAP kinases	-7.74075	-5.84863	5/31	1385,1432,5594,5600,5602	CREB1,MAPK14,MAPK1,MAPK11,MAPK10
2_Member	KEGG Pathway	hsa05131	Shigellosis	-7.69617	-5.80743	6/65	60,1432,5594,5600,5602,5603	ACTB,MAPK14,MAPK1,MAPK11,MAPK10,MAPK13
2_Member	Reactome Gene Sets	R-HSA-422475	Axon guidance	-7.65925	-5.77885	12/557	60,1385,1432,2932,5290,5293,5566,5594,5600,5603,5788,10381	ACTB,CREB1,MAPK14,GSK3B,PIK3CA,PIK3CD,PRKACA,MAPK1,MAPK11,MAPK13,PTPRC,TUBB3
2_Member	KEGG Pathway	hsa04622	RIG-I-like receptor signaling pathway	-7.49995	-5.63256	6/70	841,843,1432,5600,5602,5603	CASP8,CASP10,MAPK14,MAPK11,MAPK10,MAPK13
2_Member	GO Biological Processes	GO:0007169	transmembrane receptor protein tyrosine kinase signaling pathway	-7.4844	-5.61862	13/705	60,207,627,836,1432,1499,4914,5286,5290,5594,5600,5603,23411	ACTB,AKT1,BDNF,CASP3,MAPK14,CTNNB1,NTRK1,PIK3C2A,PIK3CA,MAPK1,MAPK11,MAPK13,SIRT1
2_Member	Reactome Gene Sets	R-HSA-168638	NOD1/2 Signaling Pathway	-7.39906	-5.54431	5/36	841,842,1432,5600,5603	CASP8,CASP9,MAPK14,MAPK11,MAPK13
2_Member	GO Biological Processes	GO:0043408	regulation of MAPK cascade	-7.32838	-5.48286	13/727	207,1432,1499,1813,4609,4914,5294,5594,5600,5602,5906,6657,9314	AKT1,MAPK14,CTNNB1,DRD2,MYC,NTRK1,PIK3CG,MAPK1,MAPK11,MAPK10,RAP1A,SOX2,KLF4
2_Member	KEGG Pathway	hsa05133	Pertussis	-7.28328	-5.4408	6/76	836,1432,5594,5600,5602,5603	CASP3,MAPK14,MAPK1,MAPK11,MAPK10,MAPK13
2_Member	GO Biological Processes	GO:0051090	regulation of DNA binding transcription factor activity	-7.12579	-5.30544	10/390	207,1432,1499,4914,5594,5600,5602,9314,23411,50674	AKT1,MAPK14,CTNNB1,NTRK1,MAPK1,MAPK11,MAPK10,KLF4,SIRT1,NEUROG3
2_Member	GO Biological Processes	GO:0071900	regulation of protein serine/threonine kinase activity	-7.08003	-5.27104	11/506	207,836,1432,4914,5294,5594,5600,5602,5906,7070,23411	AKT1,CASP3,MAPK14,NTRK1,PIK3CG,MAPK1,MAPK11,MAPK10,RAP1A,THY1,SIRT1
2_Member	KEGG Pathway	hsa05132	Salmonella infection	-6.95965	-5.1658	6/86	60,1432,5594,5600,5602,5603	ACTB,MAPK14,MAPK1,MAPK11,MAPK10,MAPK13
2_Member	KEGG Pathway	hsa04658	Th1 and Th2 cell differentiation	-6.78411	-5.0101	6/92	1432,5594,5600,5602,5603,6772	MAPK14,MAPK1,MAPK11,MAPK10,MAPK13,STAT1
2_Member	Reactome Gene Sets	R-HSA-167044	Signalling to RAS	-6.67185	-4.92049	4/20	1432,4914,5600,5603	MAPK14,NTRK1,MAPK11,MAPK13
2_Member	Reactome Gene Sets	R-HSA-168164	Toll Like Receptor 3 (TLR3) Cascade	-6.54239	-4.80432	6/101	841,1385,1432,5594,5600,5602	CASP8,CREB1,MAPK14,MAPK1,MAPK11,MAPK10
2_Member	Reactome Gene Sets	R-HSA-166166	MyD88-independent TLR4 cascade	-6.51695	-4.78362	6/102	841,1385,1432,5594,5600,5602	CASP8,CREB1,MAPK14,MAPK1,MAPK11,MAPK10
2_Member	Reactome Gene Sets	R-HSA-937061	TRIF(TICAM1)-mediated TLR4 signaling	-6.51695	-4.78362	6/102	841,1385,1432,5594,5600,5602	CASP8,CREB1,MAPK14,MAPK1,MAPK11,MAPK10
2_Member	GO Biological Processes	GO:0071902	positive regulation of protein serine/threonine kinase activity	-6.44697	-4.71949	9/351	207,1432,4914,5294,5594,5600,5602,5906,23411	AKT1,MAPK14,NTRK1,PIK3CG,MAPK1,MAPK11,MAPK10,RAP1A,SIRT1
2_Member	Reactome Gene Sets	R-HSA-198725	Nuclear Events (kinase and transcription factor activation)	-6.25937	-4.54672	4/25	1385,1432,5594,5600	CREB1,MAPK14,MAPK1,MAPK11
2_Member	Reactome Gene Sets	R-HSA-450294	MAP kinase activation in TLR cascade	-6.11791	-4.42394	5/64	1385,1432,5594,5600,5602	CREB1,MAPK14,MAPK1,MAPK11,MAPK10
2_Member	GO Biological Processes	GO:0043410	positive regulation of MAPK cascade	-6.03969	-4.35979	10/512	1432,1499,1813,4914,5294,5594,5600,5602,5906,6657	MAPK14,CTNNB1,DRD2,NTRK1,PIK3CG,MAPK1,MAPK11,MAPK10,RAP1A,SOX2
2_Member	KEGG Pathway	hsa05120	Epithelial cell signaling in Helicobacter pylori infection	-5.98562	-4.31772	5/68	836,1432,5600,5602,5603	CASP3,MAPK14,MAPK11,MAPK10,MAPK13
2_Member	Reactome Gene Sets	R-HSA-166016	Toll Like Receptor 4 (TLR4) Cascade	-5.8762	-4.22028	6/131	841,1385,1432,5594,5600,5602	CASP8,CREB1,MAPK14,MAPK1,MAPK11,MAPK10
2_Member	Reactome Gene Sets	R-HSA-448424	Interleukin-17 signaling	-5.86132	-4.20835	5/72	1385,1432,5594,5600,5602	CREB1,MAPK14,MAPK1,MAPK11,MAPK10
2_Member	KEGG Pathway	hsa05140	Leishmaniasis	-5.83139	-4.1794	5/73	1432,5594,5600,5603,6772	MAPK14,MAPK1,MAPK11,MAPK13,STAT1
2_Member	Reactome Gene Sets	R-HSA-376172	DSCAM interactions	-5.53543	-3.92349	3/11	1432,5600,5603	MAPK14,MAPK11,MAPK13
2_Member	Reactome Gene Sets	R-HSA-168142	Toll Like Receptor 10 (TLR10) Cascade	-5.47764	-3.87828	5/86	1385,1432,5594,5600,5602	CREB1,MAPK14,MAPK1,MAPK11,MAPK10
2_Member	Reactome Gene Sets	R-HSA-168176	Toll Like Receptor 5 (TLR5) Cascade	-5.47764	-3.87828	5/86	1385,1432,5594,5600,5602	CREB1,MAPK14,MAPK1,MAPK11,MAPK10
2_Member	Reactome Gene Sets	R-HSA-975871	MyD88 cascade initiated on plasma membrane	-5.47764	-3.87828	5/86	1385,1432,5594,5600,5602	CREB1,MAPK14,MAPK1,MAPK11,MAPK10
2_Member	GO Biological Processes	GO:0045639	positive regulation of myeloid cell differentiation	-5.4283	-3.83466	5/88	841,1385,1432,5600,6772	CASP8,CREB1,MAPK14,MAPK11,STAT1
2_Member	Reactome Gene Sets	R-HSA-168898	Toll-Like Receptors Cascades	-5.41918	-3.82809	6/157	841,1385,1432,5594,5600,5602	CASP8,CREB1,MAPK14,MAPK1,MAPK11,MAPK10
2_Member	Reactome Gene Sets	R-HSA-171007	p38MAPK events	-5.29819	-3.73409	3/13	1432,5600,5603	MAPK14,MAPK11,MAPK13
2_Member	Reactome Gene Sets	R-HSA-975138	TRAF6 mediated induction of NFkB and MAP kinases upon TLR7/8 or 9 activation	-5.28711	-3.72633	5/94	1385,1432,5594,5600,5602	CREB1,MAPK14,MAPK1,MAPK11,MAPK10
2_Member	Reactome Gene Sets	R-HSA-166058	MyD88:Mal cascade initiated on plasma membrane	-5.24216	-3.68922	5/96	1385,1432,5594,5600,5602	CREB1,MAPK14,MAPK1,MAPK11,MAPK10
2_Member	Reactome Gene Sets	R-HSA-168181	Toll Like Receptor 7/8 (TLR7/8) Cascade	-5.24216	-3.68922	5/96	1385,1432,5594,5600,5602	CREB1,MAPK14,MAPK1,MAPK11,MAPK10
2_Member	Reactome Gene Sets	R-HSA-168188	Toll Like Receptor TLR6:TLR2 Cascade	-5.24216	-3.68922	5/96	1385,1432,5594,5600,5602	CREB1,MAPK14,MAPK1,MAPK11,MAPK10
2_Member	Reactome Gene Sets	R-HSA-975155	MyD88 dependent cascade initiated on endosome	-5.24216	-3.68922	5/96	1385,1432,5594,5600,5602	CREB1,MAPK14,MAPK1,MAPK11,MAPK10
2_Member	GO Biological Processes	GO:0048010	vascular endothelial growth factor receptor signaling pathway	-5.22006	-3.67175	5/97	60,1432,5290,5600,5603	ACTB,MAPK14,PIK3CA,MAPK11,MAPK13
2_Member	GO Biological Processes	GO:1903708	positive regulation of hemopoiesis	-5.19108	-3.64812	6/172	572,841,1385,1432,5600,6772	BAD,CASP8,CREB1,MAPK14,MAPK11,STAT1
2_Member	GO Biological Processes	GO:0043406	positive regulation of MAP kinase activity	-5.18631	-3.64486	7/265	1432,4914,5294,5594,5600,5602,5906	MAPK14,NTRK1,PIK3CG,MAPK1,MAPK11,MAPK10,RAP1A
2_Member	Reactome Gene Sets	R-HSA-168179	Toll Like Receptor TLR1:TLR2 Cascade	-5.17658	-3.6374	5/99	1385,1432,5594,5600,5602	CREB1,MAPK14,MAPK1,MAPK11,MAPK10
2_Member	Reactome Gene Sets	R-HSA-181438	Toll Like Receptor 2 (TLR2) Cascade	-5.17658	-3.6374	5/99	1385,1432,5594,5600,5602	CREB1,MAPK14,MAPK1,MAPK11,MAPK10
2_Member	Reactome Gene Sets	R-HSA-168138	Toll Like Receptor 9 (TLR9) Cascade	-5.15518	-3.62049	5/100	1385,1432,5594,5600,5602	CREB1,MAPK14,MAPK1,MAPK11,MAPK10
2_Member	GO Biological Processes	GO:0098586	cellular response to virus	-5.09221	-3.56928	4/48	572,1432,5600,10018	BAD,MAPK14,MAPK11,BCL2L11
2_Member	GO Biological Processes	GO:0009615	response to virus	-4.75376	-3.27645	7/309	572,596,1432,5600,5788,6772,10018	BAD,BCL2,MAPK14,MAPK11,PTPRC,STAT1,BCL2L11
2_Member	Reactome Gene Sets	R-HSA-2559580	Oxidative Stress Induced Senescence	-4.68376	-3.21846	5/125	1432,5594,5600,5602,7157	MAPK14,MAPK1,MAPK11,MAPK10,TP53
2_Member	Canonical Pathways	M199	PID P38 MK2 PATHWAY	-4.63729	-3.17516	3/21	1385,1432,5600	CREB1,MAPK14,MAPK11
2_Member	Reactome Gene Sets	R-HSA-198753	ERK/MAPK targets	-4.57445	-3.12105	3/22	1432,5594,5600	MAPK14,MAPK1,MAPK11
2_Member	GO Biological Processes	GO:0043405	regulation of MAP kinase activity	-4.48005	-3.04123	7/341	1432,4914,5294,5594,5600,5602,5906	MAPK14,NTRK1,PIK3CG,MAPK1,MAPK11,MAPK10,RAP1A
2_Member	GO Biological Processes	GO:0045648	positive regulation of erythrocyte differentiation	-4.11665	-2.73229	3/31	1432,5600,6772	MAPK14,MAPK11,STAT1
2_Member	Reactome Gene Sets	R-HSA-1592230	Mitochondrial biogenesis	-3.91888	-2.56841	4/95	1385,1432,5600,54205	CREB1,MAPK14,MAPK11,CYCS
2_Member	Reactome Gene Sets	R-HSA-1852241	Organelle biogenesis and maintenance	-3.86296	-2.52346	6/297	1385,1432,5566,5600,10381,54205	CREB1,MAPK14,PRKACA,MAPK11,TUBB3,CYCS
2_Member	Reactome Gene Sets	R-HSA-2559583	Cellular Senescence	-3.76709	-2.44203	5/195	1432,5594,5600,5602,7157	MAPK14,MAPK1,MAPK11,MAPK10,TP53
2_Member	GO Biological Processes	GO:0030218	erythrocyte differentiation	-3.71942	-2.40314	4/107	836,1432,5600,6772	CASP3,MAPK14,MAPK11,STAT1
2_Member	GO Biological Processes	GO:0045646	regulation of erythrocyte differentiation	-3.60043	-2.30181	3/46	1432,5600,6772	MAPK14,MAPK11,STAT1
2_Member	GO Biological Processes	GO:0034101	erythrocyte homeostasis	-3.59931	-2.30155	4/115	836,1432,5600,6772	CASP3,MAPK14,MAPK11,STAT1
2_Member	Reactome Gene Sets	R-HSA-373752	Netrin-1 signaling	-3.49273	-2.20941	3/50	1432,5600,5603	MAPK14,MAPK11,MAPK13
2_Member	GO Biological Processes	GO:0000187	activation of MAPK activity	-3.22891	-1.97816	4/144	1432,5594,5600,5602	MAPK14,MAPK1,MAPK11,MAPK10
3_Summary	GO Biological Processes	GO:0070997	neuron death	-20.362	-16.9068	19/316	207,572,581,596,627,836,841,842,947,1385,1499,2475,2597,2932,4914,5290,7157,10018,23411,54205,5602,4609,5293,55811,6657,9314,5594,1432,164832,5566,5906,7070,843,2022,5600,10763,225689,6772,1813,100506742	AKT1,BAD,BAX,BCL2,BDNF,CASP3,CASP8,CASP9,CD34,CREB1,CTNNB1,MTOR,GAPDH,GSK3B,NTRK1,PIK3CA,TP53,BCL2L11,SIRT1,CYCS,MAPK10,MYC,PIK3CD,ADCY10,SOX2,KLF4,MAPK1,MAPK14,LONRF2,PRKACA,RAP1A,THY1,CASP10,ENG,MAPK11,NES,MAPK15,STAT1,DRD2,CASP12
3_Member	GO Biological Processes	GO:0070997	neuron death	-20.362	-16.9068	19/316	207,572,581,596,627,836,841,842,947,1385,1499,2475,2597,2932,4914,5290,7157,10018,23411	AKT1,BAD,BAX,BCL2,BDNF,CASP3,CASP8,CASP9,CD34,CREB1,CTNNB1,MTOR,GAPDH,GSK3B,NTRK1,PIK3CA,TP53,BCL2L11,SIRT1
3_Member	GO Biological Processes	GO:1901214	regulation of neuron death	-19.7515	-16.4054	18/281	207,572,581,596,627,836,841,842,947,1385,1499,2475,2932,4914,5290,7157,10018,23411	AKT1,BAD,BAX,BCL2,BDNF,CASP3,CASP8,CASP9,CD34,CREB1,CTNNB1,MTOR,GSK3B,NTRK1,PIK3CA,TP53,BCL2L11,SIRT1
3_Member	Reactome Gene Sets	R-HSA-109606	Intrinsic Pathway for Apoptosis	-16.8376	-13.7926	10/43	207,572,581,596,836,841,842,7157,10018,54205	AKT1,BAD,BAX,BCL2,CASP3,CASP8,CASP9,TP53,BCL2L11,CYCS
3_Member	Canonical Pathways	M153	PID P75 NTR PATHWAY	-16.5345	-13.517	11/69	207,572,627,836,842,4914,5290,5602,7157,10018,54205	AKT1,BAD,BDNF,CASP3,CASP9,NTRK1,PIK3CA,MAPK10,TP53,BCL2L11,CYCS
3_Member	GO Biological Processes	GO:0010942	positive regulation of cell death	-15.5319	-12.6465	20/669	207,572,581,596,836,841,842,1385,1499,2475,2597,2932,4609,4914,5293,7157,10018,23411,54205,55811	AKT1,BAD,BAX,BCL2,CASP3,CASP8,CASP9,CREB1,CTNNB1,MTOR,GAPDH,GSK3B,MYC,NTRK1,PIK3CD,TP53,BCL2L11,SIRT1,CYCS,ADCY10
3_Member	GO Biological Processes	GO:0043068	positive regulation of programmed cell death	-14.9017	-12.0927	19/621	207,572,581,596,836,841,842,1385,1499,2597,2932,4609,4914,5293,7157,10018,23411,54205,55811	AKT1,BAD,BAX,BCL2,CASP3,CASP8,CASP9,CREB1,CTNNB1,GAPDH,GSK3B,MYC,NTRK1,PIK3CD,TP53,BCL2L11,SIRT1,CYCS,ADCY10
3_Member	GO Biological Processes	GO:1901216	positive regulation of neuron death	-14.0513	-11.295	10/78	572,581,836,841,842,1499,2475,2932,7157,10018	BAD,BAX,CASP3,CASP8,CASP9,CTNNB1,MTOR,GSK3B,TP53,BCL2L11
3_Member	GO Biological Processes	GO:0043065	positive regulation of apoptotic process	-13.7567	-11.0474	18/615	207,572,581,596,836,841,842,1385,1499,2597,2932,4609,5293,7157,10018,23411,54205,55811	AKT1,BAD,BAX,BCL2,CASP3,CASP8,CASP9,CREB1,CTNNB1,GAPDH,GSK3B,MYC,PIK3CD,TP53,BCL2L11,SIRT1,CYCS,ADCY10
3_Member	GO Biological Processes	GO:0043281	regulation of cysteine-type endopeptidase activity involved in apoptotic process	-12.6298	-10.0562	12/206	207,572,581,836,841,842,4609,6657,9314,10018,23411,54205	AKT1,BAD,BAX,CASP3,CASP8,CASP9,MYC,SOX2,KLF4,BCL2L11,SIRT1,CYCS
3_Member	Canonical Pathways	M144	PID CERAMIDE PATHWAY	-12.2684	-9.76039	8/48	207,572,581,596,841,4609,5594,54205	AKT1,BAD,BAX,BCL2,CASP8,MYC,MAPK1,CYCS
3_Member	Reactome Gene Sets	R-HSA-109581	Apoptosis	-12.1495	-9.65533	11/168	207,572,581,596,836,841,842,1499,7157,10018,54205	AKT1,BAD,BAX,BCL2,CASP3,CASP8,CASP9,CTNNB1,TP53,BCL2L11,CYCS
3_Member	Reactome Gene Sets	R-HSA-5357801	Programmed Cell Death	-12.065	-9.57752	11/171	207,572,581,596,836,841,842,1499,7157,10018,54205	AKT1,BAD,BAX,BCL2,CASP3,CASP8,CASP9,CTNNB1,TP53,BCL2L11,CYCS
3_Member	GO Biological Processes	GO:2000116	regulation of cysteine-type endopeptidase activity	-11.8425	-9.38282	12/240	207,572,581,836,841,842,4609,6657,9314,10018,23411,54205	AKT1,BAD,BAX,CASP3,CASP8,CASP9,MYC,SOX2,KLF4,BCL2L11,SIRT1,CYCS
3_Member	GO Biological Processes	GO:1901215	negative regulation of neuron death	-11.6138	-9.18271	11/188	207,581,596,627,947,1385,1499,2932,4914,5290,23411	AKT1,BAX,BCL2,BDNF,CD34,CREB1,CTNNB1,GSK3B,NTRK1,PIK3CA,SIRT1
3_Member	GO Biological Processes	GO:0045862	positive regulation of proteolysis	-11.358	-8.94971	13/339	207,572,581,836,841,842,1432,2932,4609,10018,23411,54205,164832	AKT1,BAD,BAX,CASP3,CASP8,CASP9,MAPK14,GSK3B,MYC,BCL2L11,SIRT1,CYCS,LONRF2
3_Member	GO Biological Processes	GO:0052547	regulation of peptidase activity	-11.258	-8.87147	14/431	207,572,581,836,841,842,1432,2597,4609,6657,9314,10018,23411,54205	AKT1,BAD,BAX,CASP3,CASP8,CASP9,MAPK14,GAPDH,MYC,SOX2,KLF4,BCL2L11,SIRT1,CYCS
3_Member	GO Biological Processes	GO:1901030	positive regulation of mitochondrial outer membrane permeabilization involved in apoptotic signaling	-11.1951	-8.81901	7/37	572,581,596,841,2932,7157,10018	BAD,BAX,BCL2,CASP8,GSK3B,TP53,BCL2L11
3_Member	GO Biological Processes	GO:0038034	signal transduction in absence of ligand	-10.9416	-8.61433	8/69	207,572,581,596,836,842,2932,10018	AKT1,BAD,BAX,BCL2,CASP3,CASP9,GSK3B,BCL2L11
3_Member	GO Biological Processes	GO:0097192	extrinsic apoptotic signaling pathway in absence of ligand	-10.9416	-8.61433	8/69	207,572,581,596,836,842,2932,10018	AKT1,BAD,BAX,BCL2,CASP3,CASP9,GSK3B,BCL2L11
3_Member	GO Biological Processes	GO:0051402	neuron apoptotic process	-10.8931	-8.57498	11/219	581,596,627,836,842,1499,2597,4914,5290,7157,10018	BAX,BCL2,BDNF,CASP3,CASP9,CTNNB1,GAPDH,NTRK1,PIK3CA,TP53,BCL2L11
3_Member	GO Biological Processes	GO:0030162	regulation of proteolysis	-10.8136	-8.50445	17/793	207,572,581,836,841,842,1432,2597,2932,4609,5566,6657,9314,10018,23411,54205,164832	AKT1,BAD,BAX,CASP3,CASP8,CASP9,MAPK14,GAPDH,GSK3B,MYC,PRKACA,SOX2,KLF4,BCL2L11,SIRT1,CYCS,LONRF2
3_Member	GO Biological Processes	GO:0043280	positive regulation of cysteine-type endopeptidase activity involved in apoptotic process	-10.5252	-8.24605	9/120	572,581,836,841,842,4609,10018,23411,54205	BAD,BAX,CASP3,CASP8,CASP9,MYC,BCL2L11,SIRT1,CYCS
3_Member	GO Biological Processes	GO:1901028	regulation of mitochondrial outer membrane permeabilization involved in apoptotic signaling pathway	-10.4872	-8.2203	7/46	572,581,596,841,2932,7157,10018	BAD,BAX,BCL2,CASP8,GSK3B,TP53,BCL2L11
3_Member	GO Biological Processes	GO:0052548	regulation of endopeptidase activity	-10.4065	-8.14755	13/404	207,572,581,836,841,842,2597,4609,6657,9314,10018,23411,54205	AKT1,BAD,BAX,CASP3,CASP8,CASP9,GAPDH,MYC,SOX2,KLF4,BCL2L11,SIRT1,CYCS
3_Member	GO Biological Processes	GO:0010952	positive regulation of peptidase activity	-10.3823	-8.12727	10/179	572,581,836,841,842,1432,4609,10018,23411,54205	BAD,BAX,CASP3,CASP8,CASP9,MAPK14,MYC,BCL2L11,SIRT1,CYCS
3_Member	GO Biological Processes	GO:0051345	positive regulation of hydrolase activity	-10.1759	-7.95829	16/745	207,572,581,836,841,842,1432,2475,2932,4609,4914,5906,7070,10018,23411,54205	AKT1,BAD,BAX,CASP3,CASP8,CASP9,MAPK14,MTOR,GSK3B,MYC,NTRK1,RAP1A,THY1,BCL2L11,SIRT1,CYCS
3_Member	GO Biological Processes	GO:0090559	regulation of membrane permeability	-10.1542	-7.94379	8/86	572,581,596,841,2475,2932,7157,10018	BAD,BAX,BCL2,CASP8,MTOR,GSK3B,TP53,BCL2L11
3_Member	GO Biological Processes	GO:2001056	positive regulation of cysteine-type endopeptidase activity	-10.063	-7.85955	9/135	572,581,836,841,842,4609,10018,23411,54205	BAD,BAX,CASP3,CASP8,CASP9,MYC,BCL2L11,SIRT1,CYCS
3_Member	GO Biological Processes	GO:0043523	regulation of neuron apoptotic process	-10.0373	-7.84073	10/194	581,596,627,836,842,1499,4914,5290,7157,10018	BAX,BCL2,BDNF,CASP3,CASP9,CTNNB1,NTRK1,PIK3CA,TP53,BCL2L11
3_Member	GO Biological Processes	GO:0097345	mitochondrial outer membrane permeabilization	-9.97473	-7.79164	7/54	572,581,596,841,2932,7157,10018	BAD,BAX,BCL2,CASP8,GSK3B,TP53,BCL2L11
3_Member	GO Biological Processes	GO:0001844	protein insertion into mitochondrial membrane involved in apoptotic signaling pathway	-9.71574	-7.56151	6/31	572,581,596,841,7157,10018	BAD,BAX,BCL2,CASP8,TP53,BCL2L11
3_Member	GO Biological Processes	GO:1902110	positive regulation of mitochondrial membrane permeability involved in apoptotic process	-9.6415	-7.49036	7/60	572,581,596,841,2932,7157,10018	BAD,BAX,BCL2,CASP8,GSK3B,TP53,BCL2L11
3_Member	GO Biological Processes	GO:1902686	mitochondrial outer membrane permeabilization involved in programmed cell death	-9.53832	-7.39934	7/62	572,581,596,841,2932,7157,10018	BAD,BAX,BCL2,CASP8,GSK3B,TP53,BCL2L11
3_Member	GO Biological Processes	GO:0097190	apoptotic signaling pathway	-9.47668	-7.34659	14/588	207,572,581,596,836,841,842,843,1499,2932,7157,10018,23411,54205	AKT1,BAD,BAX,BCL2,CASP3,CASP8,CASP9,CASP10,CTNNB1,GSK3B,TP53,BCL2L11,SIRT1,CYCS
3_Member	GO Biological Processes	GO:0051204	protein insertion into mitochondrial membrane	-9.45677	-7.3296	6/34	572,581,596,841,7157,10018	BAD,BAX,BCL2,CASP8,TP53,BCL2L11
3_Member	GO Biological Processes	GO:0035794	positive regulation of mitochondrial membrane permeability	-9.43866	-7.31728	7/64	572,581,596,841,2932,7157,10018	BAD,BAX,BCL2,CASP8,GSK3B,TP53,BCL2L11
3_Member	GO Biological Processes	GO:0071214	cellular response to abiotic stimulus	-9.43	-7.31433	11/300	207,572,581,836,841,842,1432,2022,4609,7157,23411	AKT1,BAD,BAX,CASP3,CASP8,CASP9,MAPK14,ENG,MYC,TP53,SIRT1
3_Member	GO Biological Processes	GO:0104004	cellular response to environmental stimulus	-9.43	-7.31433	11/300	207,572,581,836,841,842,1432,2022,4609,7157,23411	AKT1,BAD,BAX,CASP3,CASP8,CASP9,MAPK14,ENG,MYC,TP53,SIRT1
3_Member	GO Biological Processes	GO:0010950	positive regulation of endopeptidase activity	-9.35427	-7.25257	9/162	572,581,836,841,842,4609,10018,23411,54205	BAD,BAX,CASP3,CASP8,CASP9,MYC,BCL2L11,SIRT1,CYCS
3_Member	GO Biological Processes	GO:1902108	regulation of mitochondrial membrane permeability involved in apoptotic process	-9.34227	-7.24603	7/66	572,581,596,841,2932,7157,10018	BAD,BAX,BCL2,CASP8,GSK3B,TP53,BCL2L11
3_Member	GO Biological Processes	GO:1905710	positive regulation of membrane permeability	-9.34227	-7.24603	7/66	572,581,596,841,2932,7157,10018	BAD,BAX,BCL2,CASP8,GSK3B,TP53,BCL2L11
3_Member	GO Biological Processes	GO:0008637	apoptotic mitochondrial changes	-8.84337	-6.80547	8/125	207,572,581,596,841,2932,7157,10018	AKT1,BAD,BAX,BCL2,CASP8,GSK3B,TP53,BCL2L11
3_Member	GO Biological Processes	GO:0046902	regulation of mitochondrial membrane permeability	-8.82251	-6.78933	7/78	572,581,596,841,2932,7157,10018	BAD,BAX,BCL2,CASP8,GSK3B,TP53,BCL2L11
3_Member	Canonical Pathways	M19	PID P73PATHWAY	-8.78311	-6.7546	7/79	581,1432,4609,4914,5600,10018,23411	BAX,MAPK14,MYC,NTRK1,MAPK11,BCL2L11,SIRT1
3_Member	GO Biological Processes	GO:0043525	positive regulation of neuron apoptotic process	-8.50907	-6.50538	6/48	581,836,842,1499,7157,10018	BAX,CASP3,CASP9,CTNNB1,TP53,BCL2L11
3_Member	GO Biological Processes	GO:0051205	protein insertion into membrane	-8.50907	-6.50538	6/48	572,581,596,841,7157,10018	BAD,BAX,BCL2,CASP8,TP53,BCL2L11
3_Member	GO Biological Processes	GO:0097193	intrinsic apoptotic signaling pathway	-8.34169	-6.34883	10/290	207,572,581,596,836,842,7157,10018,23411,54205	AKT1,BAD,BAX,BCL2,CASP3,CASP9,TP53,BCL2L11,SIRT1,CYCS
3_Member	GO Biological Processes	GO:0097191	extrinsic apoptotic signaling pathway	-8.21799	-6.23985	9/218	207,572,581,596,836,841,842,2932,10018	AKT1,BAD,BAX,BCL2,CASP3,CASP8,CASP9,GSK3B,BCL2L11
3_Member	GO Biological Processes	GO:1903827	regulation of cellular protein localization	-8.18529	-6.20921	13/615	207,572,596,627,841,1432,1499,2475,2932,5594,7157,10018,23411	AKT1,BAD,BCL2,BDNF,CASP8,MAPK14,CTNNB1,MTOR,GSK3B,MAPK1,TP53,BCL2L11,SIRT1
3_Member	GO Biological Processes	GO:2001244	positive regulation of intrinsic apoptotic signaling pathway	-8.09365	-6.13175	6/56	572,581,596,7157,10018,23411	BAD,BAX,BCL2,TP53,BCL2L11,SIRT1
3_Member	GO Biological Processes	GO:0001836	release of cytochrome c from mitochondria	-8.04623	-6.09043	6/57	207,572,581,596,7157,10018	AKT1,BAD,BAX,BCL2,TP53,BCL2L11
3_Member	GO Biological Processes	GO:0010638	positive regulation of organelle organization	-8.04443	-6.09043	13/632	572,581,596,841,1499,2475,2932,5594,7157,10018,10763,23411,225689	BAD,BAX,BCL2,CASP8,CTNNB1,MTOR,GSK3B,MAPK1,TP53,BCL2L11,NES,SIRT1,MAPK15
3_Member	GO Biological Processes	GO:0008630	intrinsic apoptotic signaling pathway in response to DNA damage	-7.99952	-6.059	7/102	572,581,596,842,7157,10018,23411	BAD,BAX,BCL2,CASP9,TP53,BCL2L11,SIRT1
3_Member	GO Biological Processes	GO:0072594	establishment of protein localization to organelle	-7.93954	-6.0084	13/645	207,572,581,596,841,1432,1499,2475,2932,5594,7157,10018,23411	AKT1,BAD,BAX,BCL2,CASP8,MAPK14,CTNNB1,MTOR,GSK3B,MAPK1,TP53,BCL2L11,SIRT1
3_Member	GO Biological Processes	GO:1900739	regulation of protein insertion into mitochondrial membrane involved in apoptotic signaling pathway	-7.89455	-5.97077	5/29	572,596,841,7157,10018	BAD,BCL2,CASP8,TP53,BCL2L11
3_Member	GO Biological Processes	GO:1900740	positive regulation of protein insertion into mitochondrial membrane involved in apoptotic signaling	-7.89455	-5.97077	5/29	572,596,841,7157,10018	BAD,BCL2,CASP8,TP53,BCL2L11
3_Member	GO Biological Processes	GO:0048872	homeostasis of number of cells	-7.88651	-5.96455	9/238	207,581,596,836,1432,5293,5600,6772,10018	AKT1,BAX,BCL2,CASP3,MAPK14,PIK3CD,MAPK11,STAT1,BCL2L11
3_Member	Reactome Gene Sets	R-HSA-114452	Activation of BH3-only proteins	-7.81625	-5.90329	5/30	207,572,596,7157,10018	AKT1,BAD,BCL2,TP53,BCL2L11
3_Member	GO Biological Processes	GO:2001235	positive regulation of apoptotic signaling pathway	-7.67093	-5.78555	8/176	572,581,596,841,2932,7157,10018,23411	BAD,BAX,BCL2,CASP8,GSK3B,TP53,BCL2L11,SIRT1
3_Member	GO Biological Processes	GO:0007006	mitochondrial membrane organization	-7.24421	-5.40775	7/131	572,581,596,841,2932,7157,10018	BAD,BAX,BCL2,CASP8,GSK3B,TP53,BCL2L11
3_Member	GO Biological Processes	GO:2001233	regulation of apoptotic signaling pathway	-7.22042	-5.38874	10/381	207,572,581,596,841,1499,2932,7157,10018,23411	AKT1,BAD,BAX,BCL2,CASP8,CTNNB1,GSK3B,TP53,BCL2L11,SIRT1
3_Member	GO Biological Processes	GO:0043029	T cell homeostasis	-7.2178	-5.38874	5/39	207,581,596,836,10018	AKT1,BAX,BCL2,CASP3,BCL2L11
3_Member	GO Biological Processes	GO:0002262	myeloid cell homeostasis	-7.06703	-5.25944	7/139	581,836,1432,5293,5600,6772,10018	BAX,CASP3,MAPK14,PIK3CD,MAPK11,STAT1,BCL2L11
3_Member	GO Biological Processes	GO:0001776	leukocyte homeostasis	-7.02106	-5.21625	6/84	207,581,596,836,5293,10018	AKT1,BAX,BCL2,CASP3,PIK3CD,BCL2L11
3_Member	GO Biological Processes	GO:0071496	cellular response to external stimulus	-6.96189	-5.16669	9/305	207,572,596,841,2022,2475,5594,7157,23411	AKT1,BAD,BCL2,CASP8,ENG,MTOR,MAPK1,TP53,SIRT1
3_Member	GO Biological Processes	GO:0090199	regulation of release of cytochrome c from mitochondria	-6.89636	-5.11055	5/45	207,572,581,7157,10018	AKT1,BAD,BAX,TP53,BCL2L11
3_Member	GO Biological Processes	GO:0003006	developmental process involved in reproduction	-6.86353	-5.08169	12/659	207,581,596,841,1432,1499,2475,4914,5566,5594,10018,23411	AKT1,BAX,BCL2,CASP8,MAPK14,CTNNB1,MTOR,NTRK1,PRKACA,MAPK1,BCL2L11,SIRT1
3_Member	GO Biological Processes	GO:0010821	regulation of mitochondrion organization	-6.8165	-5.03989	8/227	207,572,581,596,841,2932,7157,10018	AKT1,BAD,BAX,BCL2,CASP8,GSK3B,TP53,BCL2L11
3_Member	GO Biological Processes	GO:0048608	reproductive structure development	-6.73242	-4.97114	10/430	207,581,596,841,1432,1499,4914,5594,10018,23411	AKT1,BAX,BCL2,CASP8,MAPK14,CTNNB1,NTRK1,MAPK1,BCL2L11,SIRT1
3_Member	GO Biological Processes	GO:0061458	reproductive system development	-6.70456	-4.94827	10/433	207,581,596,841,1432,1499,4914,5594,10018,23411	AKT1,BAX,BCL2,CASP8,MAPK14,CTNNB1,NTRK1,MAPK1,BCL2L11,SIRT1
3_Member	GO Biological Processes	GO:2001242	regulation of intrinsic apoptotic signaling pathway	-6.68642	-4.93261	7/158	207,572,581,596,7157,10018,23411	AKT1,BAD,BAX,BCL2,TP53,BCL2L11,SIRT1
3_Member	GO Biological Processes	GO:0010822	positive regulation of mitochondrion organization	-6.45318	-4.72453	7/171	572,581,596,841,2932,7157,10018	BAD,BAX,BCL2,CASP8,GSK3B,TP53,BCL2L11
3_Member	GO Biological Processes	GO:1905477	positive regulation of protein localization to membrane	-6.23087	-4.52269	6/114	207,572,596,841,7157,10018	AKT1,BAD,BCL2,CASP8,TP53,BCL2L11
3_Member	GO Biological Processes	GO:0002260	lymphocyte homeostasis	-6.15236	-4.45079	5/63	207,581,596,836,10018	AKT1,BAX,BCL2,CASP3,BCL2L11
3_Member	GO Biological Processes	GO:0072655	establishment of protein localization to mitochondrion	-6.08366	-4.39609	7/194	207,572,581,596,841,7157,10018	AKT1,BAD,BAX,BCL2,CASP8,TP53,BCL2L11
3_Member	GO Biological Processes	GO:0048678	response to axon injury	-6.0507	-4.36944	5/66	581,596,1813,4914,9314	BAX,BCL2,DRD2,NTRK1,KLF4
3_Member	GO Biological Processes	GO:0070585	protein localization to mitochondrion	-6.03897	-4.35979	7/197	207,572,581,596,841,7157,10018	AKT1,BAD,BAX,BCL2,CASP8,TP53,BCL2L11
3_Member	GO Biological Processes	GO:0001782	B cell homeostasis	-5.98923	-4.3193	4/29	581,596,836,10018	BAX,BCL2,CASP3,BCL2L11
3_Member	GO Biological Processes	GO:0090200	positive regulation of release of cytochrome c from mitochondria	-5.98923	-4.3193	4/29	572,581,7157,10018	BAD,BAX,TP53,BCL2L11
3_Member	GO Biological Processes	GO:1903829	positive regulation of cellular protein localization	-5.92091	-4.25905	9/406	207,572,596,841,1432,2932,5594,7157,10018	AKT1,BAD,BCL2,CASP8,MAPK14,GSK3B,MAPK1,TP53,BCL2L11
3_Member	GO Biological Processes	GO:0010623	programmed cell death involved in cell development	-5.41131	-3.82192	3/12	581,596,4914	BAX,BCL2,NTRK1
3_Member	GO Biological Processes	GO:1905475	regulation of protein localization to membrane	-5.40325	-3.81723	6/158	207,572,596,841,7157,10018	AKT1,BAD,BCL2,CASP8,TP53,BCL2L11
3_Member	GO Biological Processes	GO:0009791	post-embryonic development	-5.35647	-3.77792	5/91	581,596,2475,9314,10018	BAX,BCL2,MTOR,KLF4,BCL2L11
3_Member	GO Biological Processes	GO:0070231	T cell apoptotic process	-5.12913	-3.59742	4/47	207,581,7157,10018	AKT1,BAX,TP53,BCL2L11
3_Member	GO Biological Processes	GO:0048569	post-embryonic animal organ development	-5.09819	-3.57381	3/15	581,9314,10018	BAX,KLF4,BCL2L11
3_Member	Reactome Gene Sets	R-HSA-111447	Activation of BAD and translocation to mitochondria	-5.09819	-3.57381	3/15	207,572,596	AKT1,BAD,BCL2
3_Member	GO Biological Processes	GO:0048070	regulation of developmental pigmentation	-5.00884	-3.49877	3/16	581,596,10018	BAX,BCL2,BCL2L11
3_Member	GO Biological Processes	GO:0070242	thymocyte apoptotic process	-5.00884	-3.49877	3/16	581,7157,10018	BAX,TP53,BCL2L11
3_Member	GO Biological Processes	GO:1903749	positive regulation of establishment of protein localization to mitochondrion	-4.84085	-3.35474	5/116	572,596,841,7157,10018	BAD,BCL2,CASP8,TP53,BCL2L11
3_Member	GO Biological Processes	GO:0070059	intrinsic apoptotic signaling pathway in response to endoplasmic reticulum stress	-4.76229	-3.28279	4/58	581,596,10018,23411	BAX,BCL2,BCL2L11,SIRT1
3_Member	GO Biological Processes	GO:0007005	mitochondrion organization	-4.68826	-3.22041	9/577	207,572,581,596,841,2932,7157,10018,54205	AKT1,BAD,BAX,BCL2,CASP8,GSK3B,TP53,BCL2L11,CYCS
3_Member	GO Biological Processes	GO:2001234	negative regulation of apoptotic signaling pathway	-4.68621	-3.21964	6/211	207,581,596,841,1499,23411	AKT1,BAX,BCL2,CASP8,CTNNB1,SIRT1
3_Member	GO Biological Processes	GO:1903747	regulation of establishment of protein localization to mitochondrion	-4.61778	-3.15941	5/129	572,596,841,7157,10018	BAD,BCL2,CASP8,TP53,BCL2L11
3_Member	GO Biological Processes	GO:0051881	regulation of mitochondrial membrane potential	-4.59207	-3.13681	4/64	207,572,581,596	AKT1,BAD,BAX,BCL2
3_Member	GO Biological Processes	GO:0006839	mitochondrial transport	-4.57079	-3.118	7/330	572,581,596,841,2932,7157,10018	BAD,BAX,BCL2,CASP8,GSK3B,TP53,BCL2L11
3_Member	GO Biological Processes	GO:0043524	negative regulation of neuron apoptotic process	-4.47703	-3.0394	5/138	581,596,627,4914,5290	BAX,BCL2,BDNF,NTRK1,PIK3CA
3_Member	GO Biological Processes	GO:0070227	lymphocyte apoptotic process	-4.46264	-3.02798	4/69	207,581,7157,10018	AKT1,BAX,TP53,BCL2L11
3_Member	GO Biological Processes	GO:0032461	positive regulation of protein oligomerization	-4.45741	-3.02393	3/24	581,7157,10018	BAX,TP53,BCL2L11
3_Member	GO Biological Processes	GO:0046661	male sex differentiation	-4.1837	-2.78589	5/159	581,596,1499,4914,10018	BAX,BCL2,CTNNB1,NTRK1,BCL2L11
3_Member	GO Biological Processes	GO:0008625	extrinsic apoptotic signaling pathway via death domain receptors	-4.14721	-2.75801	4/83	572,581,596,841	BAD,BAX,BCL2,CASP8
3_Member	GO Biological Processes	GO:0072657	protein localization to membrane	-4.12798	-2.74196	8/527	207,572,581,596,841,7070,7157,10018	AKT1,BAD,BAX,BCL2,CASP8,THY1,TP53,BCL2L11
3_Member	GO Biological Processes	GO:0007548	sex differentiation	-4.11619	-2.73229	6/267	581,596,1499,4914,10018,23411	BAX,BCL2,CTNNB1,NTRK1,BCL2L11,SIRT1
3_Member	GO Biological Processes	GO:0034976	response to endoplasmic reticulum stress	-4.07184	-2.69317	6/272	581,596,2932,7157,10018,23411	BAX,BCL2,GSK3B,TP53,BCL2L11,SIRT1
3_Member	GO Biological Processes	GO:0090150	establishment of protein localization to membrane	-4.04567	-2.67063	6/275	572,581,596,841,7157,10018	BAD,BAX,BCL2,CASP8,TP53,BCL2L11
3_Member	GO Biological Processes	GO:1905898	positive regulation of response to endoplasmic reticulum stress	-3.91979	-2.56841	3/36	581,10018,23411	BAX,BCL2L11,SIRT1
3_Member	GO Biological Processes	GO:0043473	pigmentation	-3.86659	-2.52576	4/98	581,596,1813,10018	BAX,BCL2,DRD2,BCL2L11
3_Member	GO Biological Processes	GO:0032459	regulation of protein oligomerization	-3.71848	-2.4031	3/42	581,7157,10018	BAX,TP53,BCL2L11
3_Member	GO Biological Processes	GO:0048066	developmental pigmentation	-3.6289	-2.32551	3/45	581,596,10018	BAX,BCL2,BCL2L11
3_Member	GO Biological Processes	GO:2001239	regulation of extrinsic apoptotic signaling pathway in absence of ligand	-3.60043	-2.30181	3/46	207,581,596	AKT1,BAX,BCL2
3_Member	GO Biological Processes	GO:0008406	gonad development	-3.57991	-2.28387	5/214	581,596,4914,10018,23411	BAX,BCL2,NTRK1,BCL2L11,SIRT1
3_Member	GO Biological Processes	GO:0045137	development of primary sexual characteristics	-3.52458	-2.23706	5/220	581,596,4914,10018,23411	BAX,BCL2,NTRK1,BCL2L11,SIRT1
3_Member	GO Biological Processes	GO:0030183	B cell differentiation	-3.51497	-2.22871	4/121	572,581,596,4914	BAD,BAX,BCL2,NTRK1
3_Member	GO Biological Processes	GO:0042476	odontogenesis	-3.51497	-2.22871	4/121	581,947,1499,10018	BAX,CD34,CTNNB1,BCL2L11
3_Member	GO Biological Processes	GO:0033135	regulation of peptidyl-serine phosphorylation	-3.37143	-2.10449	4/132	207,581,596,5290	AKT1,BAX,BCL2,PIK3CA
3_Member	GO Biological Processes	GO:0008584	male gonad development	-3.32242	-2.06029	4/136	581,596,4914,10018	BAX,BCL2,NTRK1,BCL2L11
3_Member	GO Biological Processes	GO:0046546	development of primary male sexual characteristics	-3.31041	-2.04907	4/137	581,596,4914,10018	BAX,BCL2,NTRK1,BCL2L11
3_Member	GO Biological Processes	GO:0042733	embryonic digit morphogenesis	-3.17672	-1.93326	3/64	581,1499,10018	BAX,CTNNB1,BCL2L11
3_Member	GO Biological Processes	GO:0042391	regulation of membrane potential	-3.13389	-1.89687	6/407	207,572,581,596,1813,2932	AKT1,BAD,BAX,BCL2,DRD2,GSK3B
3_Member	GO Biological Processes	GO:2001236	regulation of extrinsic apoptotic signaling pathway	-3.10917	-1.87514	4/155	207,581,596,841	AKT1,BAX,BCL2,CASP8
3_Member	KEGG Pathway	hsa04141	Protein processing in endoplasmic reticulum	-2.99836	-1.77465	4/166	581,596,5602,100506742	BAX,BCL2,MAPK10,CASP12
3_Member	GO Biological Processes	GO:1905897	regulation of response to endoplasmic reticulum stress	-2.95936	-1.74071	3/76	581,10018,23411	BAX,BCL2L11,SIRT1
3_Member	GO Biological Processes	GO:0022602	ovulation cycle process	-2.86399	-1.6567	3/82	581,596,23411	BAX,BCL2,SIRT1
3_Member	GO Biological Processes	GO:0042475	odontogenesis of dentin-containing tooth	-2.83384	-1.62865	3/84	581,1499,10018	BAX,CTNNB1,BCL2L11
3_Member	GO Biological Processes	GO:0008585	female gonad development	-2.6677	-1.47524	3/96	581,596,23411	BAX,BCL2,SIRT1
3_Member	GO Biological Processes	GO:0046545	development of primary female sexual characteristics	-2.60496	-1.41988	3/101	581,596,23411	BAX,BCL2,SIRT1
3_Member	GO Biological Processes	GO:0042698	ovulation cycle	-2.59281	-1.40972	3/102	581,596,23411	BAX,BCL2,SIRT1
3_Member	GO Biological Processes	GO:0007283	spermatogenesis	-2.5924	-1.40964	6/520	572,581,5566,10018,23411,55811	BAD,BAX,PRKACA,BCL2L11,SIRT1,ADCY10
3_Member	GO Biological Processes	GO:2001237	negative regulation of extrinsic apoptotic signaling pathway	-2.58079	-1.39936	3/103	207,596,841	AKT1,BCL2,CASP8
3_Member	GO Biological Processes	GO:0048232	male gamete generation	-2.51531	-1.33848	6/539	572,581,5566,10018,23411,55811	BAD,BAX,PRKACA,BCL2L11,SIRT1,ADCY10
3_Member	GO Biological Processes	GO:0046660	female sex differentiation	-2.4351	-1.26604	3/116	581,596,23411	BAX,BCL2,SIRT1
3_Member	GO Biological Processes	GO:0030326	embryonic limb morphogenesis	-2.32504	-1.16551	3/127	581,1499,10018	BAX,CTNNB1,BCL2L11
3_Member	GO Biological Processes	GO:0035113	embryonic appendage morphogenesis	-2.32504	-1.16551	3/127	581,1499,10018	BAX,CTNNB1,BCL2L11
3_Member	GO Biological Processes	GO:0001764	neuron migration	-2.18231	-1.03148	3/143	581,1499,1813	BAX,CTNNB1,DRD2
3_Member	GO Biological Processes	GO:0035107	appendage morphogenesis	-2.14129	-0.993831	3/148	581,1499,10018	BAX,CTNNB1,BCL2L11
3_Member	GO Biological Processes	GO:0035108	limb morphogenesis	-2.14129	-0.993831	3/148	581,1499,10018	BAX,CTNNB1,BCL2L11
4_Summary	KEGG Pathway	hsa04919	Thyroid hormone signaling pathway	-19.2371	-15.9782	14/116	60,207,572,842,1499,2475,2932,4609,5290,5293,5566,5594,6772,7157,596,1385,43,581,836,947,1432,1813,4914,5294,5460,6657,9314,10018,5906,5602,5788,5286,5288,23411,107,2597,10381,57110,841,55811,223082,5600	ACTB,AKT1,BAD,CASP9,CTNNB1,MTOR,GSK3B,MYC,PIK3CA,PIK3CD,PRKACA,MAPK1,STAT1,TP53,BCL2,CREB1,ACHE,BAX,CASP3,CD34,MAPK14,DRD2,NTRK1,PIK3CG,POU5F1,SOX2,KLF4,BCL2L11,RAP1A,MAPK10,PTPRC,PIK3C2A,PIK3C2G,SIRT1,ADCY1,GAPDH,TUBB3,HRASLS,CASP8,ADCY10,ZNRF2,MAPK11
4_Member	KEGG Pathway	hsa04919	Thyroid hormone signaling pathway	-19.2371	-15.9782	14/116	60,207,572,842,1499,2475,2932,4609,5290,5293,5566,5594,6772,7157	ACTB,AKT1,BAD,CASP9,CTNNB1,MTOR,GSK3B,MYC,PIK3CA,PIK3CD,PRKACA,MAPK1,STAT1,TP53
4_Member	KEGG Pathway	hsa05215	Prostate cancer	-17.223	-14.1531	12/87	207,572,596,842,1385,1499,2475,2932,5290,5293,5594,7157	AKT1,BAD,BCL2,CASP9,CREB1,CTNNB1,MTOR,GSK3B,PIK3CA,PIK3CD,MAPK1,TP53
4_Member	KEGG Pathway	hsa05213	Endometrial cancer	-16.1148	-13.1569	10/50	207,572,842,1499,2932,4609,5290,5293,5594,7157	AKT1,BAD,CASP9,CTNNB1,GSK3B,MYC,PIK3CA,PIK3CD,MAPK1,TP53
4_Member	GO Biological Processes	GO:0009611	response to wounding	-15.7077	-12.7876	20/655	43,60,207,581,596,836,947,1432,1813,2475,4914,5290,5293,5294,5460,5566,5594,6657,7157,9314	ACHE,ACTB,AKT1,BAX,BCL2,CASP3,CD34,MAPK14,DRD2,MTOR,NTRK1,PIK3CA,PIK3CD,PIK3CG,POU5F1,PRKACA,MAPK1,SOX2,TP53,KLF4
4_Member	KEGG Pathway	hsa01521	EGFR tyrosine kinase inhibitor resistance	-13.9934	-11.2493	10/79	207,572,581,596,2475,2932,5290,5293,5594,10018	AKT1,BAD,BAX,BCL2,MTOR,GSK3B,PIK3CA,PIK3CD,MAPK1,BCL2L11
4_Member	Reactome Gene Sets	R-HSA-5663202	Diseases of signal transduction	-13.3569	-10.69	15/376	60,207,572,842,1385,1499,2475,2932,4609,5290,5293,5594,5906,6772,10018	ACTB,AKT1,BAD,CASP9,CREB1,CTNNB1,MTOR,GSK3B,MYC,PIK3CA,PIK3CD,MAPK1,RAP1A,STAT1,BCL2L11
4_Member	KEGG Pathway	hsa05212	Pancreatic cancer	-13.055	-10.4267	9/64	207,572,842,5290,5293,5594,5602,6772,7157	AKT1,BAD,CASP9,PIK3CA,PIK3CD,MAPK1,MAPK10,STAT1,TP53
4_Member	KEGG Pathway	hsa04151	PI3K-Akt signaling pathway	-12.6141	-10.0541	14/342	207,572,596,842,1385,2475,2932,4609,5290,5293,5294,5594,7157,10018	AKT1,BAD,BCL2,CASP9,CREB1,MTOR,GSK3B,MYC,PIK3CA,PIK3CD,PIK3CG,MAPK1,TP53,BCL2L11
4_Member	Canonical Pathways	M175	PID ERBB2 ERBB3 PATHWAY	-12.593	-10.0408	8/44	207,572,2475,5290,5293,5566,5594,5602	AKT1,BAD,MTOR,PIK3CA,PIK3CD,PRKACA,MAPK1,MAPK10
4_Member	Canonical Pathways	M8626	SIG BCR SIGNALING PATHWAY	-12.4268	-9.91176	8/46	207,572,596,2932,5290,5293,5594,5788	AKT1,BAD,BCL2,GSK3B,PIK3CA,PIK3CD,MAPK1,PTPRC
4_Member	Canonical Pathways	M1718	SIG IL4RECEPTOR IN B LYPHOCYTES	-12.2504	-9.74934	7/27	207,572,596,2932,5290,5293,5594	AKT1,BAD,BCL2,GSK3B,PIK3CA,PIK3CD,MAPK1
4_Member	KEGG Pathway	hsa04012	ErbB signaling pathway	-11.8518	-9.38397	9/86	207,572,2475,2932,4609,5290,5293,5594,5602	AKT1,BAD,MTOR,GSK3B,MYC,PIK3CA,PIK3CD,MAPK1,MAPK10
4_Member	KEGG Pathway	hsa04510	Focal adhesion	-11.3445	-8.94175	11/199	60,207,572,596,1499,2932,5290,5293,5594,5602,5906	ACTB,AKT1,BAD,BCL2,CTNNB1,GSK3B,PIK3CA,PIK3CD,MAPK1,MAPK10,RAP1A
4_Member	KEGG Pathway	hsa05230	Central carbon metabolism in cancer	-11.1572	-8.79134	8/65	207,2475,4609,4914,5290,5293,5594,7157	AKT1,MTOR,MYC,NTRK1,PIK3CA,PIK3CD,MAPK1,TP53
4_Member	Canonical Pathways	M295	SIG PIP3 SIGNALING IN CARDIAC MYOCTES	-11.0476	-8.69668	8/67	207,572,1385,2475,2932,4609,5290,5293	AKT1,BAD,CREB1,MTOR,GSK3B,MYC,PIK3CA,PIK3CD
4_Member	GO Biological Processes	GO:0048015	phosphatidylinositol-mediated signaling	-10.9761	-8.63951	10/156	207,4914,5286,5288,5290,5293,5294,5594,9314,23411	AKT1,NTRK1,PIK3C2A,PIK3C2G,PIK3CA,PIK3CD,PIK3CG,MAPK1,KLF4,SIRT1
4_Member	GO Biological Processes	GO:0048017	inositol lipid-mediated signaling	-10.8935	-8.57498	10/159	207,4914,5286,5288,5290,5293,5294,5594,9314,23411	AKT1,NTRK1,PIK3C2A,PIK3C2G,PIK3CA,PIK3CD,PIK3CG,MAPK1,KLF4,SIRT1
4_Member	Reactome Gene Sets	R-HSA-9006925	Intracellular signaling by second messengers	-10.8781	-8.56449	12/290	107,207,572,842,1385,2475,2932,5290,5293,5566,5594,7157	ADCY1,AKT1,BAD,CASP9,CREB1,MTOR,GSK3B,PIK3CA,PIK3CD,PRKACA,MAPK1,TP53
4_Member	GO Biological Processes	GO:0014065	phosphatidylinositol 3-kinase signaling	-10.2715	-8.04305	9/128	207,5286,5288,5290,5293,5294,5594,9314,23411	AKT1,PIK3C2A,PIK3C2G,PIK3CA,PIK3CD,PIK3CG,MAPK1,KLF4,SIRT1
4_Member	KEGG Pathway	hsa04140	Autophagy - animal	-10.2715	-8.04305	9/128	207,572,596,2475,5290,5293,5566,5594,5602	AKT1,BAD,BCL2,MTOR,PIK3CA,PIK3CD,PRKACA,MAPK1,MAPK10
4_Member	KEGG Pathway	hsa05166	HTLV-I infection	-10.1633	-7.94933	11/256	107,207,581,1385,1499,2932,4609,5290,5293,5566,7157	ADCY1,AKT1,BAX,CREB1,CTNNB1,GSK3B,MYC,PIK3CA,PIK3CD,PRKACA,TP53
4_Member	KEGG Pathway	hsa04910	Insulin signaling pathway	-9.97713	-7.79164	9/138	207,572,2475,2932,5290,5293,5566,5594,5602	AKT1,BAD,MTOR,GSK3B,PIK3CA,PIK3CD,PRKACA,MAPK1,MAPK10
4_Member	KEGG Pathway	hsa05221	Acute myeloid leukemia	-9.9165	-7.74	7/55	207,572,2475,4609,5290,5293,5594	AKT1,BAD,MTOR,MYC,PIK3CA,PIK3CD,MAPK1
4_Member	Reactome Gene Sets	R-HSA-2219528	PI3K/AKT Signaling in Cancer	-9.8396	-7.67279	8/94	207,572,842,1385,2475,2932,5290,5293	AKT1,BAD,CASP9,CREB1,MTOR,GSK3B,PIK3CA,PIK3CD
4_Member	KEGG Pathway	hsa05224	Breast cancer	-9.81119	-7.64755	9/144	207,1499,2475,2932,4609,5290,5293,5594,7157	AKT1,CTNNB1,MTOR,GSK3B,MYC,PIK3CA,PIK3CD,MAPK1,TP53
4_Member	KEGG Pathway	hsa05223	Non-small cell lung cancer	-9.74843	-7.58796	7/58	207,572,842,5290,5293,5594,7157	AKT1,BAD,CASP9,PIK3CA,PIK3CD,MAPK1,TP53
4_Member	Canonical Pathways	M124	PID CXCR4 PATHWAY	-9.55227	-7.40725	8/102	207,572,2475,5290,5293,5294,5788,6772	AKT1,BAD,MTOR,PIK3CA,PIK3CD,PIK3CG,PTPRC,STAT1
4_Member	KEGG Pathway	hsa04213	Longevity regulating pathway - multiple species	-9.53832	-7.39934	7/62	107,207,2475,5290,5293,5566,23411	ADCY1,AKT1,MTOR,PIK3CA,PIK3CD,PRKACA,SIRT1
4_Member	Canonical Pathways	M164	PID ERBB1 DOWNSTREAM PATHWAY	-9.45066	-7.32639	8/105	207,572,1385,2475,5290,5293,5594,6772	AKT1,BAD,CREB1,MTOR,PIK3CA,PIK3CD,MAPK1,STAT1
4_Member	Canonical Pathways	M19043	ST ADRENERGIC	-9.29771	-7.20687	6/36	207,1432,5290,5293,5594,5602	AKT1,MAPK14,PIK3CA,PIK3CD,MAPK1,MAPK10
4_Member	KEGG Pathway	hsa05220	Chronic myeloid leukemia	-9.11435	-7.05204	7/71	207,572,4609,5290,5293,5594,7157	AKT1,BAD,MYC,PIK3CA,PIK3CD,MAPK1,TP53
4_Member	Canonical Pathways	M161	PID IFNG PATHWAY	-9.00667	-6.95429	6/40	207,2475,5290,5594,5906,6772	AKT1,MTOR,PIK3CA,MAPK1,RAP1A,STAT1
4_Member	Reactome Gene Sets	R-HSA-1257604	PIP3 activates AKT signaling	-8.84608	-6.8058	10/257	207,572,842,1385,2475,2932,5290,5293,5594,7157	AKT1,BAD,CASP9,CREB1,MTOR,GSK3B,PIK3CA,PIK3CD,MAPK1,TP53
4_Member	GO Biological Processes	GO:0042060	wound healing	-8.83397	-6.79843	13/543	60,207,836,947,1432,2475,5290,5293,5294,5566,5594,6657,7157	ACTB,AKT1,CASP3,CD34,MAPK14,MTOR,PIK3CA,PIK3CD,PIK3CG,PRKACA,MAPK1,SOX2,TP53
4_Member	Canonical Pathways	M48	PID MET PATHWAY	-8.74424	-6.72035	7/80	207,572,1499,2475,5290,5594,5906	AKT1,BAD,CTNNB1,MTOR,PIK3CA,MAPK1,RAP1A
4_Member	KEGG Pathway	hsa04066	HIF-1 signaling pathway	-8.0295	-6.08325	7/101	207,596,2475,2597,5290,5293,5594	AKT1,BCL2,MTOR,GAPDH,PIK3CA,PIK3CD,MAPK1
4_Member	KEGG Pathway	hsa04931	Insulin resistance	-7.85415	-5.93761	7/107	207,1385,2475,2932,5290,5293,5602	AKT1,CREB1,MTOR,GSK3B,PIK3CA,PIK3CD,MAPK10
4_Member	Canonical Pathways	M193	PID NEPHRIN NEPH1 PATHWAY	-7.74075	-5.84863	5/31	207,572,5290,5293,5602	AKT1,BAD,PIK3CA,PIK3CD,MAPK10
4_Member	KEGG Pathway	hsa05214	Glioma	-7.73734	-5.84691	6/64	207,2475,5290,5293,5594,7157	AKT1,MTOR,PIK3CA,PIK3CD,MAPK1,TP53
4_Member	KEGG Pathway	hsa05218	Melanoma	-7.53798	-5.66575	6/69	207,572,5290,5293,5594,7157	AKT1,BAD,PIK3CA,PIK3CD,MAPK1,TP53
4_Member	Canonical Pathways	M143	PID IL2 PI3K PATHWAY	-7.52918	-5.65857	5/34	207,596,2475,4609,5290	AKT1,BCL2,MTOR,MYC,PIK3CA
4_Member	Canonical Pathways	M3501	ST B CELL ANTIGEN RECEPTOR	-7.16069	-5.33309	5/40	207,572,5290,5293,5594	AKT1,BAD,PIK3CA,PIK3CD,MAPK1
4_Member	GO Biological Processes	GO:0050878	regulation of body fluid levels	-7.13233	-5.30909	11/500	60,107,207,947,1385,1813,5290,5293,5294,5566,5594	ACTB,ADCY1,AKT1,CD34,CREB1,DRD2,PIK3CA,PIK3CD,PIK3CG,PRKACA,MAPK1
4_Member	Canonical Pathways	M12771	SA PTEN PATHWAY	-6.97797	-5.18004	4/17	207,5290,5293,5594	AKT1,PIK3CA,PIK3CD,MAPK1
4_Member	Canonical Pathways	M18895	SA TRKA RECEPTOR	-6.97797	-5.18004	4/17	207,4914,5290,5293	AKT1,NTRK1,PIK3CA,PIK3CD
4_Member	KEGG Pathway	hsa04930	Type II diabetes mellitus	-6.84727	-5.06674	5/46	2475,5290,5293,5594,5602	MTOR,PIK3CA,PIK3CD,MAPK1,MAPK10
4_Member	KEGG Pathway	hsa04014	Ras signaling pathway	-6.8165	-5.03989	8/227	207,572,5290,5293,5566,5594,5602,5906	AKT1,BAD,PIK3CA,PIK3CD,PRKACA,MAPK1,MAPK10,RAP1A
4_Member	KEGG Pathway	hsa04630	Jak-STAT signaling pathway	-6.72412	-4.96409	7/156	207,596,2475,4609,5290,5293,6772	AKT1,BCL2,MTOR,MYC,PIK3CA,PIK3CD,STAT1
4_Member	GO Biological Processes	GO:0036092	phosphatidylinositol-3-phosphate biosynthetic process	-6.66168	-4.91277	5/50	5286,5288,5290,5293,5294	PIK3C2A,PIK3C2G,PIK3CA,PIK3CD,PIK3CG
4_Member	Canonical Pathways	M7955	SIG INSULIN RECEPTOR PATHWAY IN CARDIAC MYOCYTES	-6.61775	-4.87006	5/51	207,2932,5290,5293,5594	AKT1,GSK3B,PIK3CA,PIK3CD,MAPK1
4_Member	KEGG Pathway	hsa05231	Choline metabolism in cancer	-6.59407	-4.84881	6/99	207,2475,5290,5293,5594,5602	AKT1,MTOR,PIK3CA,PIK3CD,MAPK1,MAPK10
4_Member	Reactome Gene Sets	R-HSA-1660499	Synthesis of PIPs at the plasma membrane	-6.53257	-4.79605	5/53	5286,5288,5290,5293,5294	PIK3C2A,PIK3C2G,PIK3CA,PIK3CD,PIK3CG
4_Member	KEGG Pathway	hsa04923	Regulation of lipolysis in adipocytes	-6.49126	-4.76028	5/54	107,207,5290,5293,5566	ADCY1,AKT1,PIK3CA,PIK3CD,PRKACA
4_Member	Canonical Pathways	M226	PID VEGFR1 PATHWAY	-6.18768	-4.48473	4/26	207,5290,5566,5594	AKT1,PIK3CA,PRKACA,MAPK1
4_Member	GO Biological Processes	GO:0030258	lipid modification	-6.13621	-4.439	8/279	207,1432,2475,5286,5288,5290,5293,5294	AKT1,MAPK14,MTOR,PIK3C2A,PIK3C2G,PIK3CA,PIK3CD,PIK3CG
4_Member	KEGG Pathway	hsa05211	Renal cell carcinoma	-6.08403	-4.39609	5/65	207,5290,5293,5594,5906	AKT1,PIK3CA,PIK3CD,MAPK1,RAP1A
4_Member	Reactome Gene Sets	R-HSA-109582	Hemostasis	-6.03247	-4.35433	11/645	60,207,1432,5290,5293,5294,5566,5594,5906,7157,10381	ACTB,AKT1,MAPK14,PIK3CA,PIK3CD,PIK3CG,PRKACA,MAPK1,RAP1A,TP53,TUBB3
4_Member	KEGG Pathway	hsa00562	Inositol phosphate metabolism	-5.8917	-4.23381	5/71	5286,5288,5290,5293,5294	PIK3C2A,PIK3C2G,PIK3CA,PIK3CD,PIK3CG
4_Member	KEGG Pathway	hsa04662	B cell receptor signaling pathway	-5.8917	-4.23381	5/71	207,2932,5290,5293,5594	AKT1,GSK3B,PIK3CA,PIK3CD,MAPK1
4_Member	Canonical Pathways	M213	PID AR NONGENOMIC PATHWAY	-5.86881	-4.21486	4/31	207,1385,5290,5594	AKT1,CREB1,PIK3CA,MAPK1
4_Member	Reactome Gene Sets	R-HSA-1483257	Phospholipid metabolism	-5.82597	-4.17689	7/212	43,5286,5288,5290,5293,5294,57110	ACHE,PIK3C2A,PIK3C2G,PIK3CA,PIK3CD,PIK3CG,HRASLS
4_Member	KEGG Pathway	hsa05162	Measles	-5.81873	-4.17062	6/134	207,2932,5290,5293,6772,7157	AKT1,GSK3B,PIK3CA,PIK3CD,STAT1,TP53
4_Member	GO Biological Processes	GO:0043276	anoikis	-5.81168	-4.16646	4/32	207,596,2475,5290	AKT1,BCL2,MTOR,PIK3CA
4_Member	Canonical Pathways	M160	PID AVB3 INTEGRIN PATHWAY	-5.77281	-4.12951	5/75	207,841,5286,5290,5594	AKT1,CASP8,PIK3C2A,PIK3CA,MAPK1
4_Member	GO Biological Processes	GO:0090407	organophosphate biosynthetic process	-5.75971	-4.11737	11/688	43,107,1813,2597,5286,5288,5290,5293,5294,5594,55811	ACHE,ADCY1,DRD2,GAPDH,PIK3C2A,PIK3C2G,PIK3CA,PIK3CD,PIK3CG,MAPK1,ADCY10
4_Member	Canonical Pathways	M127	PID ERBB1 RECEPTOR PROXIMAL PATHWAY	-5.65109	-4.02191	4/35	5290,5293,5594,6772	PIK3CA,PIK3CD,MAPK1,STAT1
4_Member	Reactome Gene Sets	R-HSA-1483255	PI Metabolism	-5.52822	-3.91983	5/84	5286,5288,5290,5293,5294	PIK3C2A,PIK3C2G,PIK3CA,PIK3CD,PIK3CG
4_Member	KEGG Pathway	hsa04150	mTOR signaling pathway	-5.51705	-3.9121	6/151	207,2475,2932,5290,5293,5594	AKT1,MTOR,GSK3B,PIK3CA,PIK3CD,MAPK1
4_Member	GO Biological Processes	GO:0007596	blood coagulation	-5.47707	-3.87828	8/342	60,207,947,5290,5293,5294,5566,5594	ACTB,AKT1,CD34,PIK3CA,PIK3CD,PIK3CG,PRKACA,MAPK1
4_Member	GO Biological Processes	GO:0007599	hemostasis	-5.4306	-3.83466	8/347	60,207,947,5290,5293,5294,5566,5594	ACTB,AKT1,CD34,PIK3CA,PIK3CD,PIK3CG,PRKACA,MAPK1
4_Member	GO Biological Processes	GO:0050817	coagulation	-5.4214	-3.82861	8/348	60,207,947,5290,5293,5294,5566,5594	ACTB,AKT1,CD34,PIK3CA,PIK3CD,PIK3CG,PRKACA,MAPK1
4_Member	GO Biological Processes	GO:0030168	platelet activation	-5.38744	-3.80309	6/159	60,207,5290,5293,5294,5594	ACTB,AKT1,PIK3CA,PIK3CD,PIK3CG,MAPK1
4_Member	KEGG Pathway	hsa04666	Fc gamma R-mediated phagocytosis	-5.35647	-3.77792	5/91	207,5290,5293,5594,5788	AKT1,PIK3CA,PIK3CD,MAPK1,PTPRC
4_Member	KEGG Pathway	hsa05146	Amoebiasis	-5.24216	-3.68922	5/96	107,836,5290,5293,5566	ADCY1,CASP3,PIK3CA,PIK3CD,PRKACA
4_Member	Canonical Pathways	M5193	SIG CHEMOTAXIS	-5.20555	-3.65954	4/45	207,5290,5293,5294	AKT1,PIK3CA,PIK3CD,PIK3CG
4_Member	GO Biological Processes	GO:0046854	phosphatidylinositol phosphorylation	-5.13401	-3.60007	5/101	5286,5288,5290,5293,5294	PIK3C2A,PIK3C2G,PIK3CA,PIK3CD,PIK3CG
4_Member	Reactome Gene Sets	R-HSA-392451	G beta:gamma signalling through PI3Kgamma	-5.09221	-3.56928	4/48	207,5290,5293,5294	AKT1,PIK3CA,PIK3CD,PIK3CG
4_Member	Canonical Pathways	M141	PID PI3KCI PATHWAY	-5.05609	-3.53677	4/49	5290,5293,5294,5906	PIK3CA,PIK3CD,PIK3CG,RAP1A
4_Member	Reactome Gene Sets	R-HSA-397795	G-protein beta:gamma signalling	-4.98613	-3.47956	4/51	207,5290,5293,5294	AKT1,PIK3CA,PIK3CD,PIK3CG
4_Member	GO Biological Processes	GO:0008610	lipid biosynthetic process	-4.91396	-3.41638	10/686	43,207,1385,2475,5286,5288,5290,5293,5294,23411	ACHE,AKT1,CREB1,MTOR,PIK3C2A,PIK3C2G,PIK3CA,PIK3CD,PIK3CG,SIRT1
4_Member	GO Biological Processes	GO:0046834	lipid phosphorylation	-4.89612	-3.40262	5/113	5286,5288,5290,5293,5294	PIK3C2A,PIK3C2G,PIK3CA,PIK3CD,PIK3CG
4_Member	Canonical Pathways	M276	PID FGF PATHWAY	-4.85452	-3.36707	4/55	207,5290,5594,6772	AKT1,PIK3CA,MAPK1,STAT1
4_Member	Reactome Gene Sets	R-HSA-114604	GPVI-mediated activation cascade	-4.82319	-3.33775	4/56	207,5290,5293,5294	AKT1,PIK3CA,PIK3CD,PIK3CG
4_Member	Reactome Gene Sets	R-HSA-389357	CD28 dependent PI3K/Akt signaling	-4.57445	-3.12105	3/22	207,2475,5290	AKT1,MTOR,PIK3CA
4_Member	Reactome Gene Sets	R-HSA-1280218	Adaptive Immune System	-4.50799	-3.06381	10/765	207,947,2475,5290,5293,5566,5788,5906,10381,223082	AKT1,CD34,MTOR,PIK3CA,PIK3CD,PRKACA,PTPRC,RAP1A,TUBB3,ZNRF2
4_Member	GO Biological Processes	GO:0031330	negative regulation of cellular catabolic process	-4.47589	-3.03885	6/230	207,596,1432,2475,5290,5294	AKT1,BCL2,MAPK14,MTOR,PIK3CA,PIK3CG
4_Member	GO Biological Processes	GO:0006661	phosphatidylinositol biosynthetic process	-4.3742	-2.94775	5/145	5286,5288,5290,5293,5294	PIK3C2A,PIK3C2G,PIK3CA,PIK3CD,PIK3CG
4_Member	GO Biological Processes	GO:0046474	glycerophospholipid biosynthetic process	-4.36265	-2.93793	6/241	43,5286,5288,5290,5293,5294	ACHE,PIK3C2A,PIK3C2G,PIK3CA,PIK3CD,PIK3CG
4_Member	GO Biological Processes	GO:0010507	negative regulation of autophagy	-4.34278	-2.92209	4/74	207,596,2475,5290	AKT1,BCL2,MTOR,PIK3CA
4_Member	Canonical Pathways	M3270	ST INTEGRIN SIGNALING PATHWAY	-4.1678	-2.77162	4/82	207,5290,5594,5602	AKT1,PIK3CA,MAPK1,MAPK10
4_Member	GO Biological Processes	GO:0016242	negative regulation of macroautophagy	-4.16003	-2.76816	3/30	207,2475,5290	AKT1,MTOR,PIK3CA
4_Member	GO Biological Processes	GO:0045017	glycerolipid biosynthetic process	-4.09834	-2.71601	6/269	43,5286,5288,5290,5293,5294	ACHE,PIK3C2A,PIK3C2G,PIK3CA,PIK3CD,PIK3CG
4_Member	GO Biological Processes	GO:0009895	negative regulation of catabolic process	-4.08947	-2.70767	6/270	207,596,1432,2475,5290,5294	AKT1,BCL2,MAPK14,MTOR,PIK3CA,PIK3CG
4_Member	GO Biological Processes	GO:0008654	phospholipid biosynthetic process	-3.96902	-2.60818	6/284	43,5286,5288,5290,5293,5294	ACHE,PIK3C2A,PIK3C2G,PIK3CA,PIK3CD,PIK3CG
4_Member	Reactome Gene Sets	R-HSA-389356	CD28 co-stimulation	-3.95676	-2.59841	3/35	207,2475,5290	AKT1,MTOR,PIK3CA
4_Member	Canonical Pathways	M1315	SIG PIP3 SIGNALING IN B LYMPHOCYTES	-3.91979	-2.56841	3/36	207,5290,5788	AKT1,PIK3CA,PTPRC
4_Member	Reactome Gene Sets	R-HSA-6811558	PI5P, PP2A and IER3 Regulate PI3K/AKT Signaling	-3.90126	-2.55224	4/96	207,5290,5293,5594	AKT1,PIK3CA,PIK3CD,MAPK1
4_Member	KEGG Pathway	hsa04960	Aldosterone-regulated sodium reabsorption	-3.88389	-2.54012	3/37	5290,5293,5594	PIK3CA,PIK3CD,MAPK1
4_Member	KEGG Pathway	hsa04070	Phosphatidylinositol signaling system	-3.88383	-2.54012	4/97	5286,5288,5290,5293	PIK3C2A,PIK3C2G,PIK3CA,PIK3CD
4_Member	Canonical Pathways	M13	PID ERBB4 PATHWAY	-3.84899	-2.51148	3/38	5290,5293,5594	PIK3CA,PIK3CD,MAPK1
4_Member	Reactome Gene Sets	R-HSA-199418	Negative regulation of the PI3K/AKT network	-3.78313	-2.45386	4/103	207,5290,5293,5594	AKT1,PIK3CA,PIK3CD,MAPK1
4_Member	GO Biological Processes	GO:0046486	glycerolipid metabolic process	-3.77569	-2.44846	7/442	43,5286,5288,5290,5293,5294,23411	ACHE,PIK3C2A,PIK3C2G,PIK3CA,PIK3CD,PIK3CG,SIRT1
4_Member	Canonical Pathways	M41	PID ER NONGENOMIC PATHWAY	-3.74984	-2.42898	3/41	207,5290,5600	AKT1,PIK3CA,MAPK11
4_Member	Reactome Gene Sets	R-HSA-8853659	RET signaling	-3.74984	-2.42898	3/41	5290,5293,5566	PIK3CA,PIK3CD,PRKACA
4_Member	Canonical Pathways	M91	PID TCPTP PATHWAY	-3.68789	-2.37659	3/43	5290,5293,6772	PIK3CA,PIK3CD,STAT1
4_Member	Reactome Gene Sets	R-HSA-451927	Interleukin-2 family signaling	-3.65804	-2.35024	3/44	5290,5293,6772	PIK3CA,PIK3CD,STAT1
4_Member	KEGG Pathway	hsa04973	Carbohydrate digestion and absorption	-3.65804	-2.35024	3/44	207,5290,5293	AKT1,PIK3CA,PIK3CD
4_Member	GO Biological Processes	GO:0006644	phospholipid metabolic process	-3.64105	-2.33545	7/465	43,5286,5288,5290,5293,5294,9314	ACHE,PIK3C2A,PIK3C2G,PIK3CA,PIK3CD,PIK3CG,KLF4
4_Member	Reactome Gene Sets	R-HSA-512988	Interleukin-3, 5 and GM-CSF signaling	-3.5454	-2.25492	3/48	5290,5293,5566	PIK3CA,PIK3CD,PRKACA
4_Member	GO Biological Processes	GO:0046488	phosphatidylinositol metabolic process	-3.52458	-2.23706	5/220	5286,5288,5290,5293,5294	PIK3C2A,PIK3C2G,PIK3CA,PIK3CD,PIK3CG
4_Member	GO Biological Processes	GO:0043467	regulation of generation of precursor metabolites and energy	-3.51497	-2.22871	4/121	207,2475,2932,5290	AKT1,MTOR,GSK3B,PIK3CA
4_Member	GO Biological Processes	GO:0008286	insulin receptor signaling pathway	-3.50135	-2.21719	4/122	207,5286,5290,23411	AKT1,PIK3C2A,PIK3CA,SIRT1
4_Member	GO Biological Processes	GO:0006650	glycerophospholipid metabolic process	-3.43967	-2.16175	6/356	43,5286,5288,5290,5293,5294	ACHE,PIK3C2A,PIK3C2G,PIK3CA,PIK3CD,PIK3CG
4_Member	KEGG Pathway	hsa04650	Natural killer cell mediated cytotoxicity	-3.35903	-2.0937	4/133	836,5290,5293,5594	CASP3,PIK3CA,PIK3CD,MAPK1
4_Member	Canonical Pathways	M7	PID FCER1 PATHWAY	-3.21712	-1.96791	3/62	207,5290,5594	AKT1,PIK3CA,MAPK1
4_Member	Reactome Gene Sets	R-HSA-556833	Metabolism of lipids	-3.14459	-1.90493	8/737	43,5286,5288,5290,5293,5294,5566,57110	ACHE,PIK3C2A,PIK3C2G,PIK3CA,PIK3CD,PIK3CG,PRKACA,HRASLS
4_Member	GO Biological Processes	GO:0038127	ERBB signaling pathway	-3.11966	-1.88339	4/154	207,5286,5290,5594	AKT1,PIK3C2A,PIK3CA,MAPK1
4_Member	GO Biological Processes	GO:0051897	positive regulation of protein kinase B signaling	-3.09874	-1.86716	4/156	2475,5290,5293,5294	MTOR,PIK3CA,PIK3CD,PIK3CG
4_Member	Reactome Gene Sets	R-HSA-388841	Costimulation by the CD28 family	-3.0275	-1.80269	3/72	207,2475,5290	AKT1,MTOR,PIK3CA
4_Member	KEGG Pathway	hsa04360	Axon guidance	-2.91354	-1.70061	4/175	2932,5290,5293,5594	GSK3B,PIK3CA,PIK3CD,MAPK1
4_Member	GO Biological Processes	GO:0033138	positive regulation of peptidyl-serine phosphorylation	-2.61723	-1.43115	3/100	207,596,5290	AKT1,BCL2,PIK3CA
4_Member	GO Biological Processes	GO:0007173	epidermal growth factor receptor signaling pathway	-2.27841	-1.12169	3/132	207,5286,5290	AKT1,PIK3C2A,PIK3CA
4_Member	Reactome Gene Sets	R-HSA-2454202	Fc epsilon receptor (FCERI) signaling	-2.2603	-1.10514	3/134	5290,5594,5602	PIK3CA,MAPK1,MAPK10
5_Summary	KEGG Pathway	hsa04550	Signaling pathways regulating pluripotency of stem cells	-18.0957	-14.9415	14/139	207,1432,1499,2932,4609,5290,5293,5460,5594,5600,5603,6657,9314,79923,5566,5602,7157,60,2597,1385,1813,43,581,836,10763	AKT1,MAPK14,CTNNB1,GSK3B,MYC,PIK3CA,PIK3CD,POU5F1,MAPK1,MAPK11,MAPK13,SOX2,KLF4,NANOG,PRKACA,MAPK10,TP53,ACTB,GAPDH,CREB1,DRD2,ACHE,BAX,CASP3,NES
5_Member	KEGG Pathway	hsa04550	Signaling pathways regulating pluripotency of stem cells	-18.0957	-14.9415	14/139	207,1432,1499,2932,4609,5290,5293,5460,5594,5600,5603,6657,9314,79923	AKT1,MAPK14,CTNNB1,GSK3B,MYC,PIK3CA,PIK3CD,POU5F1,MAPK1,MAPK11,MAPK13,SOX2,KLF4,NANOG
5_Member	KEGG Pathway	hsa04310	Wnt signaling pathway	-5.65423	-4.02319	6/143	1499,2932,4609,5566,5602,7157	CTNNB1,GSK3B,MYC,PRKACA,MAPK10,TP53
5_Member	Canonical Pathways	M5493	WNT SIGNALING	-5.40407	-3.81723	5/89	60,1499,2597,2932,4609	ACTB,CTNNB1,GAPDH,GSK3B,MYC
5_Member	Canonical Pathways	M71	PID ILK PATHWAY	-5.20555	-3.65954	4/45	207,1385,1499,2932	AKT1,CREB1,CTNNB1,GSK3B
5_Member	Canonical Pathways	M70	PID PS1 PATHWAY	-5.1669	-3.63147	4/46	1499,2932,4609,5594	CTNNB1,GSK3B,MYC,MAPK1
5_Member	KEGG Pathway	hsa04390	Hippo signaling pathway	-4.24958	-2.84354	5/154	60,1499,2932,4609,6657	ACTB,CTNNB1,GSK3B,MYC,SOX2
5_Member	Canonical Pathways	M17761	ST WNT BETA CATENIN PATHWAY	-3.99485	-2.63051	3/34	207,1499,2932	AKT1,CTNNB1,GSK3B
5_Member	GO Biological Processes	GO:0060070	canonical Wnt signaling pathway	-3.73935	-2.42036	6/313	1432,1499,2932,4609,6657,9314	MAPK14,CTNNB1,GSK3B,MYC,SOX2,KLF4
5_Member	GO Biological Processes	GO:1905114	cell surface receptor signaling pathway involved in cell-cell signaling	-3.73499	-2.41691	8/601	207,1432,1499,1813,2932,4609,6657,9314	AKT1,MAPK14,CTNNB1,DRD2,GSK3B,MYC,SOX2,KLF4
5_Member	Reactome Gene Sets	R-HSA-3769402	Deactivation of the beta-catenin transactivating complex	-3.71848	-2.4031	3/42	207,1499,6657	AKT1,CTNNB1,SOX2
5_Member	GO Biological Processes	GO:0001649	osteoblast differentiation	-3.6564	-2.34948	5/206	43,207,1499,5566,6657	ACHE,AKT1,CTNNB1,PRKACA,SOX2
5_Member	GO Biological Processes	GO:0016055	Wnt signaling pathway	-3.47139	-2.18932	7/496	1432,1499,1813,2932,4609,6657,9314	MAPK14,CTNNB1,DRD2,GSK3B,MYC,SOX2,KLF4
5_Member	GO Biological Processes	GO:0198738	cell-cell signaling by wnt	-3.46087	-2.18005	7/498	1432,1499,1813,2932,4609,6657,9314	MAPK14,CTNNB1,DRD2,GSK3B,MYC,SOX2,KLF4
5_Member	Reactome Gene Sets	R-HSA-201681	TCF dependent signaling in response to WNT	-3.41023	-2.13559	5/233	207,1499,2932,4609,6657	AKT1,CTNNB1,GSK3B,MYC,SOX2
5_Member	KEGG Pathway	hsa05217	Basal cell carcinoma	-3.37021	-2.10449	3/55	1499,2932,7157	CTNNB1,GSK3B,TP53
5_Member	Reactome Gene Sets	R-HSA-195721	Signaling by WNT	-2.73408	-1.53513	5/330	207,1499,2932,4609,6657	AKT1,CTNNB1,GSK3B,MYC,SOX2
5_Member	GO Biological Processes	GO:0022411	cellular component disassembly	-2.39645	-1.23186	6/570	581,836,1499,2932,4609,10763	BAX,CASP3,CTNNB1,GSK3B,MYC,NES
5_Member	KEGG Pathway	hsa04110	Cell cycle	-2.35399	-1.19257	3/124	2932,4609,7157	GSK3B,MYC,TP53
5_Member	GO Biological Processes	GO:0032984	protein-containing complex disassembly	-2.01939	-0.8801	4/312	1499,2932,4609,10763	CTNNB1,GSK3B,MYC,NES
5_Member	GO Biological Processes	GO:0006338	chromatin remodeling	-2.00541	-0.867614	3/166	60,1499,4609	ACTB,CTNNB1,MYC
6_Summary	GO Biological Processes	GO:0071417	cellular response to organonitrogen compound	-16.1603	-13.1821	19/530	60,107,207,836,1385,1499,2475,2932,4914,5286,5290,5294,5566,5594,5906,6772,7157,9314,23411,572,627,1813,5293,5602,55811,43,596,1432,841,842,10018,581,100506742,10381	ACTB,ADCY1,AKT1,CASP3,CREB1,CTNNB1,MTOR,GSK3B,NTRK1,PIK3C2A,PIK3CA,PIK3CG,PRKACA,MAPK1,RAP1A,STAT1,TP53,KLF4,SIRT1,BAD,BDNF,DRD2,PIK3CD,MAPK10,ADCY10,ACHE,BCL2,MAPK14,CASP8,CASP9,BCL2L11,BAX,CASP12,TUBB3
6_Member	GO Biological Processes	GO:0071417	cellular response to organonitrogen compound	-16.1603	-13.1821	19/530	60,107,207,836,1385,1499,2475,2932,4914,5286,5290,5294,5566,5594,5906,6772,7157,9314,23411	ACTB,ADCY1,AKT1,CASP3,CREB1,CTNNB1,MTOR,GSK3B,NTRK1,PIK3C2A,PIK3CA,PIK3CG,PRKACA,MAPK1,RAP1A,STAT1,TP53,KLF4,SIRT1
6_Member	GO Biological Processes	GO:1901699	cellular response to nitrogen compound	-14.8006	-12.0054	19/629	60,107,207,836,1385,1499,2475,2932,4914,5286,5290,5294,5566,5594,5906,6772,7157,9314,23411	ACTB,ADCY1,AKT1,CASP3,CREB1,CTNNB1,MTOR,GSK3B,NTRK1,PIK3C2A,PIK3CA,PIK3CG,PRKACA,MAPK1,RAP1A,STAT1,TP53,KLF4,SIRT1
6_Member	KEGG Pathway	hsa04024	cAMP signaling pathway	-14.3478	-11.579	13/198	107,207,572,627,1385,1813,5290,5293,5566,5594,5602,5906,55811	ADCY1,AKT1,BAD,BDNF,CREB1,DRD2,PIK3CA,PIK3CD,PRKACA,MAPK1,MAPK10,RAP1A,ADCY10
6_Member	KEGG Pathway	hsa04725	Cholinergic synapse	-12.4282	-9.91176	10/112	43,107,207,596,1385,5290,5293,5294,5566,5594	ACHE,ADCY1,AKT1,BCL2,CREB1,PIK3CA,PIK3CD,PIK3CG,PRKACA,MAPK1
6_Member	GO Biological Processes	GO:1901652	response to peptide	-11.7736	-9.32822	15/484	107,207,1385,1432,2475,2932,4914,5286,5290,5566,5594,6772,7157,9314,23411	ADCY1,AKT1,CREB1,MAPK14,MTOR,GSK3B,NTRK1,PIK3C2A,PIK3CA,PRKACA,MAPK1,STAT1,TP53,KLF4,SIRT1
6_Member	GO Biological Processes	GO:1901653	cellular response to peptide	-11.1994	-8.81901	13/349	107,207,1385,2932,4914,5286,5290,5566,5594,6772,7157,9314,23411	ADCY1,AKT1,CREB1,GSK3B,NTRK1,PIK3C2A,PIK3CA,PRKACA,MAPK1,STAT1,TP53,KLF4,SIRT1
6_Member	GO Biological Processes	GO:0071407	cellular response to organic cyclic compound	-10.7756	-8.47093	15/569	60,107,207,836,841,842,1499,5294,5566,5594,5906,6772,9314,10018,23411	ACTB,ADCY1,AKT1,CASP3,CASP8,CASP9,CTNNB1,PIK3CG,PRKACA,MAPK1,RAP1A,STAT1,KLF4,BCL2L11,SIRT1
6_Member	KEGG Pathway	hsa04062	Chemokine signaling pathway	-8.90606	-6.86098	9/182	107,207,2932,5290,5293,5566,5594,5906,6772	ADCY1,AKT1,GSK3B,PIK3CA,PIK3CD,PRKACA,MAPK1,RAP1A,STAT1
6_Member	KEGG Pathway	hsa04915	Estrogen signaling pathway	-8.12137	-6.15346	7/98	107,207,1385,5290,5293,5566,5594	ADCY1,AKT1,CREB1,PIK3CA,PIK3CD,PRKACA,MAPK1
6_Member	KEGG Pathway	hsa04371	Apelin signaling pathway	-7.08858	-5.27677	7/138	107,207,2475,5294,5566,5594,55811	ADCY1,AKT1,MTOR,PIK3CG,PRKACA,MAPK1,ADCY10
6_Member	GO Biological Processes	GO:0071375	cellular response to peptide hormone stimulus	-6.97401	-5.17744	9/304	107,207,1385,5286,5290,5566,5594,6772,23411	ADCY1,AKT1,CREB1,PIK3C2A,PIK3CA,PRKACA,MAPK1,STAT1,SIRT1
6_Member	KEGG Pathway	hsa04072	Phospholipase D signaling pathway	-6.92069	-5.12953	7/146	107,207,2475,5290,5293,5294,5594	ADCY1,AKT1,MTOR,PIK3CA,PIK3CD,PIK3CG,MAPK1
6_Member	GO Biological Processes	GO:0043434	response to peptide hormone	-6.87501	-5.09185	10/415	107,207,1385,2475,5286,5290,5566,5594,6772,23411	ADCY1,AKT1,CREB1,MTOR,PIK3C2A,PIK3CA,PRKACA,MAPK1,STAT1,SIRT1
6_Member	GO Biological Processes	GO:0032870	cellular response to hormone stimulus	-6.6625	-4.91277	12/688	107,207,842,1385,1499,5286,5290,5566,5594,6772,10018,23411	ADCY1,AKT1,CASP9,CREB1,CTNNB1,PIK3C2A,PIK3CA,PRKACA,MAPK1,STAT1,BCL2L11,SIRT1
6_Member	KEGG Pathway	hsa04916	Melanogenesis	-6.54239	-4.80432	6/101	107,1385,1499,2932,5566,5594	ADCY1,CREB1,CTNNB1,GSK3B,PRKACA,MAPK1
6_Member	Reactome Gene Sets	R-HSA-442720	CREB phosphorylation through the activation of Adenylate Cyclase	-6.20554	-4.49958	3/7	107,1385,5566	ADCY1,CREB1,PRKACA
6_Member	Reactome Gene Sets	R-HSA-111996	Ca-dependent events	-5.92794	-4.26408	4/30	107,1385,5566,5594	ADCY1,CREB1,PRKACA,MAPK1
6_Member	Canonical Pathways	M240	PID SYNDECAN 2 PATHWAY	-5.75643	-4.11504	4/33	581,836,5566,5594	BAX,CASP3,PRKACA,MAPK1
6_Member	KEGG Pathway	hsa05020	Prion diseases	-5.65109	-4.02191	4/35	581,5566,5594,100506742	BAX,PRKACA,MAPK1,CASP12
6_Member	Reactome Gene Sets	R-HSA-438064	Post NMDA receptor activation events	-5.55198	-3.93915	4/37	107,1385,5566,5594	ADCY1,CREB1,PRKACA,MAPK1
6_Member	KEGG Pathway	hsa04540	Gap junction	-5.4283	-3.83466	5/88	107,1813,5566,5594,10381	ADCY1,DRD2,PRKACA,MAPK1,TUBB3
6_Member	Reactome Gene Sets	R-HSA-442755	Activation of NMDA receptor and postsynaptic events	-5.36979	-3.78876	4/41	107,1385,5566,5594	ADCY1,CREB1,PRKACA,MAPK1
6_Member	KEGG Pathway	hsa04022	cGMP-PKG signaling pathway	-5.32524	-3.74916	6/163	107,207,572,1385,5294,5594	ADCY1,AKT1,BAD,CREB1,PIK3CG,MAPK1
6_Member	KEGG Pathway	hsa04713	Circadian entrainment	-5.24216	-3.68922	5/96	107,1385,5566,5594,55811	ADCY1,CREB1,PRKACA,MAPK1,ADCY10
6_Member	Reactome Gene Sets	R-HSA-112043	PLC beta mediated events	-5.1669	-3.63147	4/46	107,1385,5566,5594	ADCY1,CREB1,PRKACA,MAPK1
6_Member	Reactome Gene Sets	R-HSA-112040	G-protein mediated events	-5.12913	-3.59742	4/47	107,1385,5566,5594	ADCY1,CREB1,PRKACA,MAPK1
6_Member	GO Biological Processes	GO:0071241	cellular response to inorganic substance	-5.11978	-3.58954	6/177	107,207,572,1385,5594,55811	ADCY1,AKT1,BAD,CREB1,MAPK1,ADCY10
6_Member	Canonical Pathways	M56	PID LPA4 PATHWAY	-5.09819	-3.57381	3/15	107,1385,5566	ADCY1,CREB1,PRKACA
6_Member	Reactome Gene Sets	R-HSA-5610787	Hedgehog 'off' state	-4.89612	-3.40262	5/113	107,2932,5566,10381,55811	ADCY1,GSK3B,PRKACA,TUBB3,ADCY10
6_Member	Reactome Gene Sets	R-HSA-111931	PKA-mediated phosphorylation of CREB	-4.70342	-3.23237	3/20	107,1385,5566	ADCY1,CREB1,PRKACA
6_Member	KEGG Pathway	hsa04720	Long-term potentiation	-4.51318	-3.06774	4/67	107,5566,5594,5906	ADCY1,PRKACA,MAPK1,RAP1A
6_Member	Reactome Gene Sets	R-HSA-5358351	Signaling by Hedgehog	-4.31781	-2.90055	5/149	107,2932,5566,10381,55811	ADCY1,GSK3B,PRKACA,TUBB3,ADCY10
6_Member	KEGG Pathway	hsa04921	Oxytocin signaling pathway	-4.26304	-2.85142	5/153	60,107,5294,5566,5594	ACTB,ADCY1,PIK3CG,PRKACA,MAPK1
6_Member	Reactome Gene Sets	R-HSA-111933	Calmodulin induced events	-4.25156	-2.84497	3/28	107,1385,5566	ADCY1,CREB1,PRKACA
6_Member	Reactome Gene Sets	R-HSA-111997	CaM pathway	-4.25156	-2.84497	3/28	107,1385,5566	ADCY1,CREB1,PRKACA
6_Member	Reactome Gene Sets	R-HSA-111885	Opioid Signalling	-4.14721	-2.75801	4/83	107,1385,5566,5594	ADCY1,CREB1,PRKACA,MAPK1
6_Member	Reactome Gene Sets	R-HSA-1489509	DAG and IP3 signaling	-3.99485	-2.63051	3/34	107,1385,5566	ADCY1,CREB1,PRKACA
6_Member	Reactome Gene Sets	R-HSA-112315	Transmission across Chemical Synapses	-3.4709	-2.18924	5/226	43,107,1385,5566,5594	ACHE,ADCY1,CREB1,PRKACA,MAPK1
6_Member	GO Biological Processes	GO:0033762	response to glucagon	-3.46723	-2.18599	3/51	107,1385,5566	ADCY1,CREB1,PRKACA
6_Member	GO Biological Processes	GO:0071248	cellular response to metal ion	-3.13024	-1.89359	4/153	107,207,1385,5594	ADCY1,AKT1,CREB1,MAPK1
6_Member	Reactome Gene Sets	R-HSA-112314	Neurotransmitter receptors and postsynaptic signal transmission	-3.10917	-1.87514	4/155	107,1385,5566,5594	ADCY1,CREB1,PRKACA,MAPK1
6_Member	KEGG Pathway	hsa04918	Thyroid hormone synthesis	-2.99294	-1.77031	3/74	107,1385,5566	ADCY1,CREB1,PRKACA
6_Member	KEGG Pathway	hsa04971	Gastric acid secretion	-2.97603	-1.75521	3/75	60,107,5566	ACTB,ADCY1,PRKACA
6_Member	KEGG Pathway	hsa04925	Aldosterone synthesis and secretion	-2.86399	-1.6567	3/82	107,1385,5566	ADCY1,CREB1,PRKACA
6_Member	KEGG Pathway	hsa04911	Insulin secretion	-2.81905	-1.61526	3/85	107,1385,5566	ADCY1,CREB1,PRKACA
6_Member	KEGG Pathway	hsa05414	Dilated cardiomyopathy	-2.74781	-1.54851	3/90	60,107,5566	ACTB,ADCY1,PRKACA
6_Member	Reactome Gene Sets	R-HSA-112316	Neuronal System	-2.52429	-1.34714	5/369	43,107,1385,5566,5594	ACHE,ADCY1,CREB1,PRKACA,MAPK1
6_Member	Reactome Gene Sets	R-HSA-163685	Integration of energy metabolism	-2.50002	-1.32612	3/110	107,5566,5906	ADCY1,PRKACA,RAP1A
6_Member	KEGG Pathway	hsa04726	Serotonergic synapse	-2.46709	-1.2961	3/113	836,5566,5594	CASP3,PRKACA,MAPK1
6_Member	KEGG Pathway	hsa04724	Glutamatergic synapse	-2.45632	-1.2863	3/114	107,5566,5594	ADCY1,PRKACA,MAPK1
6_Member	Reactome Gene Sets	R-HSA-418594	G alpha (i) signalling events	-2.38453	-1.22089	5/398	107,1385,1813,5566,5594	ADCY1,CREB1,DRD2,PRKACA,MAPK1
6_Member	KEGG Pathway	hsa04270	Vascular smooth muscle contraction	-2.38372	-1.2204	3/121	107,5566,5594	ADCY1,PRKACA,MAPK1
6_Member	KEGG Pathway	hsa04114	Oocyte meiosis	-2.35399	-1.19257	3/124	107,5566,5594	ADCY1,PRKACA,MAPK1
7_Summary	KEGG Pathway	hsa04215	Apoptosis - multiple species	-13.6892	-10.9909	8/33	581,596,836,841,842,5602,10018,54205,843,572,2597,2932,5594,100506742,7157,627,1385,60,6772,1499,1813,5566	BAX,BCL2,CASP3,CASP8,CASP9,MAPK10,BCL2L11,CYCS,CASP10,BAD,GAPDH,GSK3B,MAPK1,CASP12,TP53,BDNF,CREB1,ACTB,STAT1,CTNNB1,DRD2,PRKACA
7_Member	KEGG Pathway	hsa04215	Apoptosis - multiple species	-13.6892	-10.9909	8/33	581,596,836,841,842,5602,10018,54205	BAX,BCL2,CASP3,CASP8,CASP9,MAPK10,BCL2L11,CYCS
7_Member	Canonical Pathways	M220	PID CASPASE PATHWAY	-10.0948	-7.88782	7/52	581,596,836,841,842,843,54205	BAX,BCL2,CASP3,CASP8,CASP9,CASP10,CYCS
7_Member	KEGG Pathway	hsa05010	Alzheimer's disease	-9.14567	-7.08085	9/171	572,836,841,842,2597,2932,5594,54205,100506742	BAD,CASP3,CASP8,CASP9,GAPDH,GSK3B,MAPK1,CYCS,CASP12
7_Member	GO Biological Processes	GO:0008635	activation of cysteine-type endopeptidase activity involved in apoptotic process by cytochrome c	-8.24727	-6.26706	4/9	581,836,842,54205	BAX,CASP3,CASP9,CYCS
7_Member	KEGG Pathway	hsa04115	p53 signaling pathway	-7.53798	-5.66575	6/69	581,836,841,842,7157,54205	BAX,CASP3,CASP8,CASP9,TP53,CYCS
7_Member	Canonical Pathways	M197	PID HIV NEF PATHWAY	-7.46311	-5.60051	5/35	596,836,841,842,54205	BCL2,CASP3,CASP8,CASP9,CYCS
7_Member	KEGG Pathway	hsa05016	Huntington's disease	-7.35951	-5.50632	8/193	581,627,836,841,842,1385,7157,54205	BAX,BDNF,CASP3,CASP8,CASP9,CREB1,TP53,CYCS
7_Member	GO Biological Processes	GO:0006919	activation of cysteine-type endopeptidase activity involved in apoptotic process	-7.08405	-5.27365	6/82	572,581,836,841,842,54205	BAD,BAX,CASP3,CASP8,CASP9,CYCS
7_Member	Canonical Pathways	M7997	SA CASPASE CASCADE	-6.76789	-4.99645	4/19	836,841,842,843	CASP3,CASP8,CASP9,CASP10
7_Member	Reactome Gene Sets	R-HSA-111459	Activation of caspases through apoptosome-mediated cleavage	-6.74796	-4.98417	3/5	836,842,54205	CASP3,CASP9,CYCS
7_Member	Reactome Gene Sets	R-HSA-111461	Cytochrome c-mediated apoptotic response	-6.74796	-4.98417	3/5	836,842,54205	CASP3,CASP9,CYCS
7_Member	KEGG Pathway	hsa05416	Viral myocarditis	-6.29618	-4.58016	5/59	60,836,841,842,54205	ACTB,CASP3,CASP8,CASP9,CYCS
7_Member	Reactome Gene Sets	R-HSA-111471	Apoptotic factor-mediated response	-6.20554	-4.49958	3/7	836,842,54205	CASP3,CASP9,CYCS
7_Member	Canonical Pathways	M5060	SA FAS SIGNALING	-5.82698	-4.17693	3/9	596,836,841	BCL2,CASP3,CASP8
7_Member	GO Biological Processes	GO:0032025	response to cobalt ion	-5.6729	-4.04	3/10	836,841,842	CASP3,CASP8,CASP9
7_Member	GO Biological Processes	GO:0034349	glial cell apoptotic process	-5.19428	-3.6498	3/14	836,842,7157	CASP3,CASP9,TP53
7_Member	GO Biological Processes	GO:0046677	response to antibiotic	-5.1669	-3.63147	4/46	836,841,842,7157	CASP3,CASP8,CASP9,TP53
7_Member	KEGG Pathway	hsa05168	Herpes simplex infection	-5.0101	-3.49877	6/185	836,841,5602,6772,7157,54205	CASP3,CASP8,MAPK10,STAT1,TP53,CYCS
7_Member	KEGG Pathway	hsa05134	Legionellosis	-4.85452	-3.36707	4/55	836,841,842,54205	CASP3,CASP8,CASP9,CYCS
7_Member	GO Biological Processes	GO:0032355	response to estradiol	-4.70061	-3.2302	5/124	572,836,841,842,1499	BAD,CASP3,CASP8,CASP9,CTNNB1
7_Member	KEGG Pathway	hsa05012	Parkinson's disease	-4.4176	-2.98765	5/142	836,842,1813,5566,54205	CASP3,CASP9,DRD2,PRKACA,CYCS
7_Member	Reactome Gene Sets	R-HSA-5357769	Caspase activation via extrinsic apoptotic signalling pathway	-4.29996	-2.88383	3/27	836,841,842	CASP3,CASP8,CASP9
7_Member	Reactome Gene Sets	R-HSA-111465	Apoptotic cleavage of cellular proteins	-3.84899	-2.51148	3/38	836,841,1499	CASP3,CASP8,CTNNB1
7_Member	Canonical Pathways	M142	PID AJDISS 2PATHWAY	-3.5454	-2.25492	3/48	627,836,1499	BDNF,CASP3,CTNNB1
7_Member	Reactome Gene Sets	R-HSA-75153	Apoptotic execution phase	-3.44224	-2.1639	3/52	836,841,1499	CASP3,CASP8,CTNNB1
8_Summary	KEGG Pathway	hsa04211	Longevity regulating pathway	-13.4544	-10.7669	10/89	107,207,581,1385,2475,5290,5293,5566,7157,23411,572,842,2932,4914,1813,5294,9314,5594,6657,50674,596,6772,1432,2597,1499,5600,947,2022,5286,43,5906,836,4609,54205,164832,627,5602,57110	ADCY1,AKT1,BAX,CREB1,MTOR,PIK3CA,PIK3CD,PRKACA,TP53,SIRT1,BAD,CASP9,GSK3B,NTRK1,DRD2,PIK3CG,KLF4,MAPK1,SOX2,NEUROG3,BCL2,STAT1,MAPK14,GAPDH,CTNNB1,MAPK11,CD34,ENG,PIK3C2A,ACHE,RAP1A,CASP3,MYC,CYCS,LONRF2,BDNF,MAPK10,HRASLS
8_Member	KEGG Pathway	hsa04211	Longevity regulating pathway	-13.4544	-10.7669	10/89	107,207,581,1385,2475,5290,5293,5566,7157,23411	ADCY1,AKT1,BAX,CREB1,MTOR,PIK3CA,PIK3CD,PRKACA,TP53,SIRT1
8_Member	Reactome Gene Sets	R-HSA-5674400	Constitutive Signaling by AKT1 E17K in Cancer	-10.3292	-8.08576	6/25	207,572,842,1385,2475,2932	AKT1,BAD,CASP9,CREB1,MTOR,GSK3B
8_Member	Canonical Pathways	M249	PID PI3KCI AKT PATHWAY	-9.376	-7.26597	6/35	207,572,842,2475,2932,5566	AKT1,BAD,CASP9,MTOR,GSK3B,PRKACA
8_Member	Canonical Pathways	M271	PID PI3K PLC TRK PATHWAY	-9.29771	-7.20687	6/36	207,572,1385,2932,4914,5290	AKT1,BAD,CREB1,GSK3B,NTRK1,PIK3CA
8_Member	GO Biological Processes	GO:0043491	protein kinase B signaling	-8.97887	-6.93137	10/249	207,842,1385,1813,2475,5290,5293,5294,9314,23411	AKT1,CASP9,CREB1,DRD2,MTOR,PIK3CA,PIK3CD,PIK3CG,KLF4,SIRT1
8_Member	GO Biological Processes	GO:0035270	endocrine system development	-8.8712	-6.82852	8/124	207,572,1385,1813,2932,5594,6657,50674	AKT1,BAD,CREB1,DRD2,GSK3B,MAPK1,SOX2,NEUROG3
8_Member	Canonical Pathways	M231	PID KIT PATHWAY	-8.29279	-6.3063	6/52	207,572,596,2932,5290,6772	AKT1,BAD,BCL2,GSK3B,PIK3CA,STAT1
8_Member	GO Biological Processes	GO:0006006	glucose metabolic process	-7.41228	-5.55441	8/190	207,572,1432,2475,2597,2932,5290,23411	AKT1,BAD,MAPK14,MTOR,GAPDH,GSK3B,PIK3CA,SIRT1
8_Member	Reactome Gene Sets	R-HSA-198323	AKT phosphorylates targets in the cytosol	-7.35152	-5.49987	4/14	207,572,842,2932	AKT1,BAD,CASP9,GSK3B
8_Member	GO Biological Processes	GO:0033002	muscle cell proliferation	-7.09216	-5.27767	8/209	207,1432,1499,2475,5600,6772,7157,9314	AKT1,MAPK14,CTNNB1,MTOR,MAPK11,STAT1,TP53,KLF4
8_Member	GO Biological Processes	GO:0051896	regulation of protein kinase B signaling	-6.99753	-5.19686	8/215	207,1813,2475,5290,5293,5294,9314,23411	AKT1,DRD2,MTOR,PIK3CA,PIK3CD,PIK3CG,KLF4,SIRT1
8_Member	GO Biological Processes	GO:0019318	hexose metabolic process	-6.75844	-4.98828	8/231	207,572,1432,2475,2597,2932,5290,23411	AKT1,BAD,MAPK14,MTOR,GAPDH,GSK3B,PIK3CA,SIRT1
8_Member	GO Biological Processes	GO:2000377	regulation of reactive oxygen species metabolic process	-6.41899	-4.69498	7/173	207,596,947,1432,2475,7157,9314	AKT1,BCL2,CD34,MAPK14,MTOR,TP53,KLF4
8_Member	GO Biological Processes	GO:0005996	monosaccharide metabolic process	-6.19537	-4.49051	8/274	207,572,1432,2475,2597,2932,5290,23411	AKT1,BAD,MAPK14,MTOR,GAPDH,GSK3B,PIK3CA,SIRT1
8_Member	KEGG Pathway	hsa04152	AMPK signaling pathway	-6.07842	-4.39273	6/121	207,1385,2475,5290,5293,23411	AKT1,CREB1,MTOR,PIK3CA,PIK3CD,SIRT1
8_Member	GO Biological Processes	GO:0001667	ameboidal-type cell migration	-5.94752	-4.28063	9/403	207,1432,2022,2475,5286,5290,6772,9314,23411	AKT1,MAPK14,ENG,MTOR,PIK3C2A,PIK3CA,STAT1,KLF4,SIRT1
8_Member	Canonical Pathways	M242	PID AURORA A PATHWAY	-5.86881	-4.21486	4/31	207,2932,5566,7157	AKT1,GSK3B,PRKACA,TP53
8_Member	GO Biological Processes	GO:0010631	epithelial cell migration	-5.78304	-4.13878	8/311	207,1432,2475,5286,5290,6772,9314,23411	AKT1,MAPK14,MTOR,PIK3C2A,PIK3CA,STAT1,KLF4,SIRT1
8_Member	GO Biological Processes	GO:0090132	epithelium migration	-5.75199	-4.11155	8/314	207,1432,2475,5286,5290,6772,9314,23411	AKT1,MAPK14,MTOR,PIK3C2A,PIK3CA,STAT1,KLF4,SIRT1
8_Member	GO Biological Processes	GO:0031016	pancreas development	-5.74414	-4.1056	5/76	207,572,1499,2932,50674	AKT1,BAD,CTNNB1,GSK3B,NEUROG3
8_Member	GO Biological Processes	GO:0048660	regulation of smooth muscle cell proliferation	-5.7078	-4.0702	6/140	207,1499,2475,6772,7157,9314	AKT1,CTNNB1,MTOR,STAT1,TP53,KLF4
8_Member	GO Biological Processes	GO:0090130	tissue migration	-5.69086	-4.05609	8/320	207,1432,2475,5286,5290,6772,9314,23411	AKT1,MAPK14,MTOR,PIK3C2A,PIK3CA,STAT1,KLF4,SIRT1
8_Member	GO Biological Processes	GO:0048659	smooth muscle cell proliferation	-5.65423	-4.02319	6/143	207,1499,2475,6772,7157,9314	AKT1,CTNNB1,MTOR,STAT1,TP53,KLF4
8_Member	Canonical Pathways	M14532	ST PHOSPHOINOSITIDE 3 KINASE PATHWAY	-5.55198	-3.93915	4/37	207,572,2932,5290	AKT1,BAD,GSK3B,PIK3CA
8_Member	GO Biological Processes	GO:0043542	endothelial cell migration	-5.51697	-3.9121	7/236	207,1432,5286,5290,6772,9314,23411	AKT1,MAPK14,PIK3C2A,PIK3CA,STAT1,KLF4,SIRT1
8_Member	GO Biological Processes	GO:2000379	positive regulation of reactive oxygen species metabolic process	-5.30996	-3.73958	5/93	207,1432,2475,7157,9314	AKT1,MAPK14,MTOR,TP53,KLF4
8_Member	GO Biological Processes	GO:0072593	reactive oxygen species metabolic process	-5.29566	-3.73409	7/255	207,596,947,1432,2475,7157,9314	AKT1,BCL2,CD34,MAPK14,MTOR,TP53,KLF4
8_Member	GO Biological Processes	GO:0031018	endocrine pancreas development	-5.24511	-3.68922	4/44	207,572,2932,50674	AKT1,BAD,GSK3B,NEUROG3
8_Member	GO Biological Processes	GO:0010906	regulation of glucose metabolic process	-5.24216	-3.68922	5/96	207,572,2475,2932,23411	AKT1,BAD,MTOR,GSK3B,SIRT1
8_Member	GO Biological Processes	GO:0042136	neurotransmitter biosynthetic process	-5.17658	-3.6374	5/99	43,207,947,2475,9314	ACHE,AKT1,CD34,MTOR,KLF4
8_Member	GO Biological Processes	GO:0018107	peptidyl-threonine phosphorylation	-4.78708	-3.30296	5/119	207,596,2475,2932,5594	AKT1,BCL2,MTOR,GSK3B,MAPK1
8_Member	GO Biological Processes	GO:0001505	regulation of neurotransmitter levels	-4.77191	-3.28912	7/307	43,207,947,1813,2475,5906,9314	ACHE,AKT1,CD34,DRD2,MTOR,RAP1A,KLF4
8_Member	GO Biological Processes	GO:0010675	regulation of cellular carbohydrate metabolic process	-4.75203	-3.27645	5/121	207,572,2475,2932,23411	AKT1,BAD,MTOR,GSK3B,SIRT1
8_Member	GO Biological Processes	GO:0045598	regulation of fat cell differentiation	-4.75203	-3.27645	5/121	207,1385,1432,2475,23411	AKT1,CREB1,MAPK14,MTOR,SIRT1
8_Member	GO Biological Processes	GO:0045428	regulation of nitric oxide biosynthetic process	-4.73266	-3.25838	4/59	207,947,2475,9314	AKT1,CD34,MTOR,KLF4
8_Member	GO Biological Processes	GO:0045444	fat cell differentiation	-4.68621	-3.21964	6/211	207,1385,1432,2475,9314,23411	AKT1,CREB1,MAPK14,MTOR,KLF4,SIRT1
8_Member	GO Biological Processes	GO:0018210	peptidyl-threonine modification	-4.66706	-3.20302	5/126	207,596,2475,2932,5594	AKT1,BCL2,MTOR,GSK3B,MAPK1
8_Member	Canonical Pathways	M15	PID LYSOPHOSPHOLIPID PATHWAY	-4.53906	-3.08984	4/66	107,207,836,2932	ADCY1,AKT1,CASP3,GSK3B
8_Member	GO Biological Processes	GO:0043535	regulation of blood vessel endothelial cell migration	-4.52282	-3.07556	5/135	207,1432,5286,9314,23411	AKT1,MAPK14,PIK3C2A,KLF4,SIRT1
8_Member	Canonical Pathways	M105	PID TELOMERASE PATHWAY	-4.48772	-3.0471	4/68	207,2475,4609,5594	AKT1,MTOR,MYC,MAPK1
8_Member	GO Biological Processes	GO:0043536	positive regulation of blood vessel endothelial cell migration	-4.46264	-3.02798	4/69	207,1432,5286,23411	AKT1,MAPK14,PIK3C2A,SIRT1
8_Member	Canonical Pathways	M121	PID MTOR 4PATHWAY	-4.46264	-3.02798	4/69	207,2475,5594,54205	AKT1,MTOR,MAPK1,CYCS
8_Member	GO Biological Processes	GO:0006809	nitric oxide biosynthetic process	-4.43795	-3.00565	4/70	207,947,2475,9314	AKT1,CD34,MTOR,KLF4
8_Member	GO Biological Processes	GO:0042133	neurotransmitter metabolic process	-4.43229	-3.00057	5/141	43,207,947,2475,9314	ACHE,AKT1,CD34,MTOR,KLF4
8_Member	GO Biological Processes	GO:0005979	regulation of glycogen biosynthetic process	-4.35029	-2.92845	3/26	207,2475,2932	AKT1,MTOR,GSK3B
8_Member	GO Biological Processes	GO:0010962	regulation of glucan biosynthetic process	-4.35029	-2.92845	3/26	207,2475,2932	AKT1,MTOR,GSK3B
8_Member	GO Biological Processes	GO:0046209	nitric oxide metabolic process	-4.34278	-2.92209	4/74	207,947,2475,9314	AKT1,CD34,MTOR,KLF4
8_Member	GO Biological Processes	GO:0010634	positive regulation of epithelial cell migration	-4.31781	-2.90055	5/149	207,1432,2475,5286,23411	AKT1,MAPK14,MTOR,PIK3C2A,SIRT1
8_Member	GO Biological Processes	GO:2001057	reactive nitrogen species metabolic process	-4.27491	-2.86217	4/77	207,947,2475,9314	AKT1,CD34,MTOR,KLF4
8_Member	GO Biological Processes	GO:0032868	response to insulin	-4.27414	-2.86197	6/250	207,2475,5286,5290,6772,23411	AKT1,MTOR,PIK3C2A,PIK3CA,STAT1,SIRT1
8_Member	GO Biological Processes	GO:0043534	blood vessel endothelial cell migration	-4.23622	-2.83129	5/155	207,1432,5286,9314,23411	AKT1,MAPK14,PIK3C2A,KLF4,SIRT1
8_Member	GO Biological Processes	GO:0010632	regulation of epithelial cell migration	-4.22648	-2.82423	6/255	207,1432,2475,5286,9314,23411	AKT1,MAPK14,MTOR,PIK3C2A,KLF4,SIRT1
8_Member	GO Biological Processes	GO:0042063	gliogenesis	-4.20771	-2.80717	6/257	207,1385,1499,2475,5594,6657	AKT1,CREB1,CTNNB1,MTOR,MAPK1,SOX2
8_Member	Reactome Gene Sets	R-HSA-5218920	VEGFR2 mediated vascular permeability	-4.20496	-2.80517	3/29	207,1499,2475	AKT1,CTNNB1,MTOR
8_Member	GO Biological Processes	GO:0070873	regulation of glycogen metabolic process	-4.16003	-2.76816	3/30	207,2475,2932	AKT1,MTOR,GSK3B
8_Member	Canonical Pathways	M125	PID IGF1 PATHWAY	-4.16003	-2.76816	3/30	207,572,5290	AKT1,BAD,PIK3CA
8_Member	GO Biological Processes	GO:1903426	regulation of reactive oxygen species biosynthetic process	-4.12688	-2.7414	4/84	207,947,2475,9314	AKT1,CD34,MTOR,KLF4
8_Member	Reactome Gene Sets	R-HSA-5628897	TP53 Regulates Metabolic Genes	-4.06741	-2.68926	4/87	207,2475,7157,54205	AKT1,MTOR,TP53,CYCS
8_Member	GO Biological Processes	GO:0001935	endothelial cell proliferation	-4.04633	-2.67077	5/170	207,947,2475,6772,23411	AKT1,CD34,MTOR,STAT1,SIRT1
8_Member	GO Biological Processes	GO:0015980	energy derivation by oxidation of organic compounds	-4.03702	-2.66249	6/276	207,2475,2932,4609,5290,54205	AKT1,MTOR,GSK3B,MYC,PIK3CA,CYCS
8_Member	GO Biological Processes	GO:0032885	regulation of polysaccharide biosynthetic process	-4.03415	-2.66167	3/33	207,2475,2932	AKT1,MTOR,GSK3B
8_Member	GO Biological Processes	GO:0006112	energy reserve metabolic process	-4.01007	-2.64066	4/90	207,2475,2932,4609	AKT1,MTOR,GSK3B,MYC
8_Member	GO Biological Processes	GO:0006109	regulation of carbohydrate metabolic process	-3.99876	-2.63138	5/174	207,572,2475,2932,23411	AKT1,BAD,MTOR,GSK3B,SIRT1
8_Member	GO Biological Processes	GO:0031641	regulation of myelination	-3.99485	-2.63051	3/34	207,1499,2475	AKT1,CTNNB1,MTOR
8_Member	Canonical Pathways	M18342	ST G ALPHA I PATHWAY	-3.95676	-2.59841	3/35	207,1813,5594	AKT1,DRD2,MAPK1
8_Member	Reactome Gene Sets	R-HSA-6804757	Regulation of TP53 Degradation	-3.91979	-2.56841	3/36	207,2475,7157	AKT1,MTOR,TP53
8_Member	GO Biological Processes	GO:0032881	regulation of polysaccharide metabolic process	-3.88389	-2.54012	3/37	207,2475,2932	AKT1,MTOR,GSK3B
8_Member	Reactome Gene Sets	R-HSA-6806003	Regulation of TP53 Expression and Degradation	-3.88389	-2.54012	3/37	207,2475,7157	AKT1,MTOR,TP53
8_Member	GO Biological Processes	GO:0010001	glial cell differentiation	-3.77749	-2.4498	5/194	207,1499,2475,5594,6657	AKT1,CTNNB1,MTOR,MAPK1,SOX2
8_Member	GO Biological Processes	GO:1903409	reactive oxygen species biosynthetic process	-3.76696	-2.44203	4/104	207,947,2475,9314	AKT1,CD34,MTOR,KLF4
8_Member	GO Biological Processes	GO:0010594	regulation of endothelial cell migration	-3.75675	-2.43274	5/196	207,1432,5286,9314,23411	AKT1,MAPK14,PIK3C2A,KLF4,SIRT1
8_Member	GO Biological Processes	GO:0005975	carbohydrate metabolic process	-3.74979	-2.42898	8/598	207,572,1432,2475,2597,2932,5290,23411	AKT1,BAD,MAPK14,MTOR,GAPDH,GSK3B,PIK3CA,SIRT1
8_Member	GO Biological Processes	GO:0032869	cellular response to insulin stimulus	-3.74646	-2.42702	5/197	207,5286,5290,6772,23411	AKT1,PIK3C2A,PIK3CA,STAT1,SIRT1
8_Member	GO Biological Processes	GO:0010595	positive regulation of endothelial cell migration	-3.68851	-2.37659	4/109	207,1432,5286,23411	AKT1,MAPK14,PIK3C2A,SIRT1
8_Member	GO Biological Processes	GO:0045429	positive regulation of nitric oxide biosynthetic process	-3.68789	-2.37659	3/43	207,2475,9314	AKT1,MTOR,KLF4
8_Member	GO Biological Processes	GO:1904407	positive regulation of nitric oxide metabolic process	-3.68789	-2.37659	3/43	207,2475,9314	AKT1,MTOR,KLF4
8_Member	GO Biological Processes	GO:0031929	TOR signaling	-3.67328	-2.36326	4/110	207,2475,5290,23411	AKT1,MTOR,PIK3CA,SIRT1
8_Member	GO Biological Processes	GO:0006091	generation of precursor metabolites and energy	-3.65245	-2.34597	7/463	207,2475,2597,2932,4609,5290,54205	AKT1,MTOR,GAPDH,GSK3B,MYC,PIK3CA,CYCS
8_Member	GO Biological Processes	GO:0031331	positive regulation of cellular catabolic process	-3.60854	-2.30775	6/331	207,572,581,2932,23411,164832	AKT1,BAD,BAX,GSK3B,SIRT1,LONRF2
8_Member	GO Biological Processes	GO:0005978	glycogen biosynthetic process	-3.5454	-2.25492	3/48	207,2475,2932	AKT1,MTOR,GSK3B
8_Member	GO Biological Processes	GO:0009250	glucan biosynthetic process	-3.5454	-2.25492	3/48	207,2475,2932	AKT1,MTOR,GSK3B
8_Member	Canonical Pathways	M219	PID HEDGEHOG GLI PATHWAY	-3.5454	-2.25492	3/48	207,2932,5566	AKT1,GSK3B,PRKACA
8_Member	GO Biological Processes	GO:0051051	negative regulation of transport	-3.44519	-2.16561	7/501	207,596,947,1813,2475,2932,5906	AKT1,BCL2,CD34,DRD2,MTOR,GSK3B,RAP1A
8_Member	GO Biological Processes	GO:0050994	regulation of lipid catabolic process	-3.44224	-2.1639	3/52	207,2475,5294	AKT1,MTOR,PIK3CG
8_Member	GO Biological Processes	GO:1903428	positive regulation of reactive oxygen species biosynthetic process	-3.39375	-2.12314	3/54	207,2475,9314	AKT1,MTOR,KLF4
8_Member	GO Biological Processes	GO:0019216	regulation of lipid metabolic process	-3.38848	-2.11873	6/364	207,1385,2475,5294,9314,23411	AKT1,CREB1,MTOR,PIK3CG,KLF4,SIRT1
8_Member	GO Biological Processes	GO:0009896	positive regulation of catabolic process	-3.28387	-2.0253	6/381	207,572,581,2932,23411,164832	AKT1,BAD,BAX,GSK3B,SIRT1,LONRF2
8_Member	Reactome Gene Sets	R-HSA-6807070	PTEN Regulation	-3.27494	-2.01834	4/140	207,2475,5594,7157	AKT1,MTOR,MAPK1,TP53
8_Member	GO Biological Processes	GO:0043271	negative regulation of ion transport	-3.2633	-2.00748	4/141	207,596,1813,2475	AKT1,BCL2,DRD2,MTOR
8_Member	GO Biological Processes	GO:0044262	cellular carbohydrate metabolic process	-3.25529	-2.00104	5/252	207,572,2475,2932,23411	AKT1,BAD,MTOR,GSK3B,SIRT1
8_Member	Reactome Gene Sets	R-HSA-8943724	Regulation of PTEN gene transcription	-3.23783	-1.98631	3/61	2475,5594,7157	MTOR,MAPK1,TP53
8_Member	GO Biological Processes	GO:0033692	cellular polysaccharide biosynthetic process	-3.19675	-1.94947	3/63	207,2475,2932	AKT1,MTOR,GSK3B
8_Member	GO Biological Processes	GO:0008361	regulation of cell size	-3.18425	-1.93851	4/148	207,627,1385,2475	AKT1,BDNF,CREB1,MTOR
8_Member	GO Biological Processes	GO:0046889	positive regulation of lipid biosynthetic process	-3.17672	-1.93326	3/64	207,1385,2475	AKT1,CREB1,MTOR
8_Member	GO Biological Processes	GO:0001936	regulation of endothelial cell proliferation	-3.10917	-1.87514	4/155	207,2475,6772,23411	AKT1,MTOR,STAT1,SIRT1
8_Member	KEGG Pathway	hsa04920	Adipocytokine signaling pathway	-3.08129	-1.85171	3/69	207,2475,5602	AKT1,MTOR,MAPK10
8_Member	GO Biological Processes	GO:0000271	polysaccharide biosynthetic process	-3.04516	-1.81852	3/71	207,2475,2932	AKT1,MTOR,GSK3B
8_Member	GO Biological Processes	GO:0046890	regulation of lipid biosynthetic process	-2.98869	-1.76643	4/167	207,1385,2475,23411	AKT1,CREB1,MTOR,SIRT1
8_Member	GO Biological Processes	GO:0005977	glycogen metabolic process	-2.95936	-1.74071	3/76	207,2475,2932	AKT1,MTOR,GSK3B
8_Member	GO Biological Processes	GO:0006073	cellular glucan metabolic process	-2.94292	-1.72714	3/77	207,2475,2932	AKT1,MTOR,GSK3B
8_Member	GO Biological Processes	GO:0034637	cellular carbohydrate biosynthetic process	-2.94292	-1.72714	3/77	207,2475,2932	AKT1,MTOR,GSK3B
8_Member	GO Biological Processes	GO:0044042	glucan metabolic process	-2.94292	-1.72714	3/77	207,2475,2932	AKT1,MTOR,GSK3B
8_Member	GO Biological Processes	GO:0061136	regulation of proteasomal protein catabolic process	-2.94127	-1.72604	4/172	207,2932,5566,164832	AKT1,GSK3B,PRKACA,LONRF2
8_Member	GO Biological Processes	GO:0032436	positive regulation of proteasomal ubiquitin-dependent protein catabolic process	-2.87935	-1.66961	3/81	207,2932,164832	AKT1,GSK3B,LONRF2
8_Member	GO Biological Processes	GO:0043255	regulation of carbohydrate biosynthetic process	-2.87935	-1.66961	3/81	207,2475,2932	AKT1,MTOR,GSK3B
8_Member	GO Biological Processes	GO:0019217	regulation of fatty acid metabolic process	-2.83384	-1.62865	3/84	207,2475,23411	AKT1,MTOR,SIRT1
8_Member	GO Biological Processes	GO:0048661	positive regulation of smooth muscle cell proliferation	-2.83384	-1.62865	3/84	207,2475,6772	AKT1,MTOR,STAT1
8_Member	GO Biological Processes	GO:0071229	cellular response to acid chemical	-2.73303	-1.53442	4/196	207,1385,2475,9314	AKT1,CREB1,MTOR,KLF4
8_Member	GO Biological Processes	GO:0016051	carbohydrate biosynthetic process	-2.71697	-1.52005	4/198	207,2475,2597,2932	AKT1,MTOR,GAPDH,GSK3B
8_Member	GO Biological Processes	GO:0044264	cellular polysaccharide metabolic process	-2.70706	-1.51119	3/93	207,2475,2932	AKT1,MTOR,GSK3B
8_Member	GO Biological Processes	GO:1903050	regulation of proteolysis involved in cellular protein catabolic process	-2.70109	-1.50556	4/200	207,2932,5566,164832	AKT1,GSK3B,PRKACA,LONRF2
8_Member	GO Biological Processes	GO:2000060	positive regulation of ubiquitin-dependent protein catabolic process	-2.69379	-1.49895	3/94	207,2932,164832	AKT1,GSK3B,LONRF2
8_Member	GO Biological Processes	GO:0001938	positive regulation of endothelial cell proliferation	-2.65488	-1.46444	3/97	207,2475,23411	AKT1,MTOR,SIRT1
8_Member	GO Biological Processes	GO:0034766	negative regulation of ion transmembrane transport	-2.65488	-1.46444	3/97	207,1813,2475	AKT1,DRD2,MTOR
8_Member	GO Biological Processes	GO:0021510	spinal cord development	-2.62964	-1.4429	3/99	207,2475,50674	AKT1,MTOR,NEUROG3
8_Member	GO Biological Processes	GO:1901800	positive regulation of proteasomal protein catabolic process	-2.58079	-1.39936	3/103	207,2932,164832	AKT1,GSK3B,LONRF2
8_Member	GO Biological Processes	GO:0005976	polysaccharide metabolic process	-2.55712	-1.37734	3/105	207,2475,2932	AKT1,MTOR,GSK3B
8_Member	GO Biological Processes	GO:0060079	excitatory postsynaptic potential	-2.53393	-1.35579	3/107	207,1813,2932	AKT1,DRD2,GSK3B
8_Member	GO Biological Processes	GO:0042552	myelination	-2.50002	-1.32612	3/110	207,1499,2475	AKT1,CTNNB1,MTOR
8_Member	GO Biological Processes	GO:1903362	regulation of cellular protein catabolic process	-2.49579	-1.32222	4/228	207,2932,5566,164832	AKT1,GSK3B,PRKACA,LONRF2
8_Member	GO Biological Processes	GO:0007272	ensheathment of neurons	-2.46709	-1.2961	3/113	207,1499,2475	AKT1,CTNNB1,MTOR
8_Member	GO Biological Processes	GO:0008366	axon ensheathment	-2.46709	-1.2961	3/113	207,1499,2475	AKT1,CTNNB1,MTOR
8_Member	GO Biological Processes	GO:0099565	chemical synaptic transmission, postsynaptic	-2.46709	-1.2961	3/113	207,1813,2932	AKT1,DRD2,GSK3B
8_Member	GO Biological Processes	GO:0032434	regulation of proteasomal ubiquitin-dependent protein catabolic process	-2.41426	-1.24808	3/118	207,2932,164832	AKT1,GSK3B,LONRF2
8_Member	GO Biological Processes	GO:0034763	negative regulation of transmembrane transport	-2.41426	-1.24808	3/118	207,1813,2475	AKT1,DRD2,MTOR
8_Member	GO Biological Processes	GO:1903052	positive regulation of proteolysis involved in cellular protein catabolic process	-2.41426	-1.24808	3/118	207,2932,164832	AKT1,GSK3B,LONRF2
8_Member	GO Biological Processes	GO:0060078	regulation of postsynaptic membrane potential	-2.40399	-1.23845	3/119	207,1813,2932	AKT1,DRD2,GSK3B
8_Member	GO Biological Processes	GO:0045834	positive regulation of lipid metabolic process	-2.36382	-1.20145	3/123	207,1385,2475	AKT1,CREB1,MTOR
8_Member	GO Biological Processes	GO:1903364	positive regulation of cellular protein catabolic process	-2.24248	-1.08887	3/136	207,2932,164832	AKT1,GSK3B,LONRF2
8_Member	GO Biological Processes	GO:2000058	regulation of ubiquitin-dependent protein catabolic process	-2.1907	-1.03957	3/142	207,2932,164832	AKT1,GSK3B,LONRF2
8_Member	GO Biological Processes	GO:0090066	regulation of anatomical structure size	-2.13451	-0.98766	5/457	207,627,1385,2475,5286	AKT1,BDNF,CREB1,MTOR,PIK3C2A
8_Member	GO Biological Processes	GO:1903034	regulation of response to wounding	-2.0488	-0.907105	3/160	947,2475,9314	CD34,MTOR,KLF4
8_Member	GO Biological Processes	GO:0016042	lipid catabolic process	-2.03851	-0.897724	4/308	207,2475,5294,57110	AKT1,MTOR,PIK3CG,HRASLS
8_Member	GO Biological Processes	GO:0010565	regulation of cellular ketone metabolic process	-2.01252	-0.874126	3/165	207,2475,23411	AKT1,MTOR,SIRT1
9_Summary	GO Biological Processes	GO:0010035	response to inorganic substance	-12.6241	-10.0562	16/512	107,207,572,596,836,841,842,1385,1813,4914,5594,6772,7157,9314,23411,55811,581,1432,2475,4609,5602,60,1499,5906,947,2022,54205,5286,5293,5788,7070,5290,10018,5288,627,2597,5600	ADCY1,AKT1,BAD,BCL2,CASP3,CASP8,CASP9,CREB1,DRD2,NTRK1,MAPK1,STAT1,TP53,KLF4,SIRT1,ADCY10,BAX,MAPK14,MTOR,MYC,MAPK10,ACTB,CTNNB1,RAP1A,CD34,ENG,CYCS,PIK3C2A,PIK3CD,PTPRC,THY1,PIK3CA,BCL2L11,PIK3C2G,BDNF,GAPDH,MAPK11
9_Member	GO Biological Processes	GO:0010035	response to inorganic substance	-12.6241	-10.0562	16/512	107,207,572,596,836,841,842,1385,1813,4914,5594,6772,7157,9314,23411,55811	ADCY1,AKT1,BAD,BCL2,CASP3,CASP8,CASP9,CREB1,DRD2,NTRK1,MAPK1,STAT1,TP53,KLF4,SIRT1,ADCY10
9_Member	GO Biological Processes	GO:0009314	response to radiation	-11.138	-8.77716	14/440	207,581,596,836,842,1385,1432,1813,2475,4609,4914,5602,7157,23411	AKT1,BAX,BCL2,CASP3,CASP9,CREB1,MAPK14,DRD2,MTOR,MYC,NTRK1,MAPK10,TP53,SIRT1
9_Member	GO Biological Processes	GO:0009416	response to light stimulus	-10.6564	-8.37307	12/303	207,581,596,836,842,1385,1813,2475,4609,5602,7157,23411	AKT1,BAX,BCL2,CASP3,CASP9,CREB1,DRD2,MTOR,MYC,MAPK10,TP53,SIRT1
9_Member	GO Biological Processes	GO:0009636	response to toxic substance	-10.5046	-8.23081	14/491	60,572,581,596,836,841,1385,1813,4914,5594,6772,7157,9314,23411	ACTB,BAD,BAX,BCL2,CASP3,CASP8,CREB1,DRD2,NTRK1,MAPK1,STAT1,TP53,KLF4,SIRT1
9_Member	GO Biological Processes	GO:0035690	cellular response to drug	-10.0334	-7.84024	12/343	60,107,572,842,1499,4609,4914,5594,5906,7157,9314,23411	ACTB,ADCY1,BAD,CASP9,CTNNB1,MYC,NTRK1,MAPK1,RAP1A,TP53,KLF4,SIRT1
9_Member	GO Biological Processes	GO:0010038	response to metal ion	-8.97968	-6.93137	11/331	107,207,572,596,836,841,842,1385,1813,5594,7157	ADCY1,AKT1,BAD,BCL2,CASP3,CASP8,CASP9,CREB1,DRD2,MAPK1,TP53
9_Member	GO Biological Processes	GO:0001666	response to hypoxia	-8.79103	-6.76019	11/345	207,572,596,836,947,1385,1813,2475,4609,7157,23411	AKT1,BAD,BCL2,CASP3,CD34,CREB1,DRD2,MTOR,MYC,TP53,SIRT1
9_Member	GO Biological Processes	GO:0036293	response to decreased oxygen levels	-8.68691	-6.66895	11/353	207,572,596,836,947,1385,1813,2475,4609,7157,23411	AKT1,BAD,BCL2,CASP3,CD34,CREB1,DRD2,MTOR,MYC,TP53,SIRT1
9_Member	GO Biological Processes	GO:0070482	response to oxygen levels	-8.38928	-6.38996	11/377	207,572,596,836,947,1385,1813,2475,4609,7157,23411	AKT1,BAD,BCL2,CASP3,CD34,CREB1,DRD2,MTOR,MYC,TP53,SIRT1
9_Member	GO Biological Processes	GO:0007568	aging	-8.25666	-6.27436	10/296	207,596,842,1385,1432,2022,2475,4914,7157,23411	AKT1,BCL2,CASP9,CREB1,MAPK14,ENG,MTOR,NTRK1,TP53,SIRT1
9_Member	GO Biological Processes	GO:0000302	response to reactive oxygen species	-8.11523	-6.14933	9/224	207,572,596,836,5594,6772,7157,9314,23411	AKT1,BAD,BCL2,CASP3,MAPK1,STAT1,TP53,KLF4,SIRT1
9_Member	GO Biological Processes	GO:0006979	response to oxidative stress	-7.74785	-5.84863	11/435	207,572,596,836,1499,5594,6772,7157,9314,23411,54205	AKT1,BAD,BCL2,CASP3,CTNNB1,MAPK1,STAT1,TP53,KLF4,SIRT1,CYCS
9_Member	GO Biological Processes	GO:0030335	positive regulation of cell migration	-7.42353	-5.56251	11/468	207,596,1432,2475,5286,5293,5594,5788,7070,7157,23411	AKT1,BCL2,MAPK14,MTOR,PIK3C2A,PIK3CD,MAPK1,PTPRC,THY1,TP53,SIRT1
9_Member	GO Biological Processes	GO:2000147	positive regulation of cell motility	-7.27526	-5.43429	11/484	207,596,1432,2475,5286,5293,5594,5788,7070,7157,23411	AKT1,BCL2,MAPK14,MTOR,PIK3C2A,PIK3CD,MAPK1,PTPRC,THY1,TP53,SIRT1
9_Member	GO Biological Processes	GO:0071456	cellular response to hypoxia	-7.27349	-5.43403	8/198	207,572,596,947,2475,4609,7157,23411	AKT1,BAD,BCL2,CD34,MTOR,MYC,TP53,SIRT1
9_Member	GO Biological Processes	GO:0051272	positive regulation of cellular component movement	-7.15874	-5.3326	11/497	207,596,1432,2475,5286,5293,5594,5788,7070,7157,23411	AKT1,BCL2,MAPK14,MTOR,PIK3C2A,PIK3CD,MAPK1,PTPRC,THY1,TP53,SIRT1
9_Member	GO Biological Processes	GO:0036294	cellular response to decreased oxygen levels	-7.15689	-5.3322	8/205	207,572,596,947,2475,4609,7157,23411	AKT1,BAD,BCL2,CD34,MTOR,MYC,TP53,SIRT1
9_Member	GO Biological Processes	GO:0042542	response to hydrogen peroxide	-7.11029	-5.29138	7/137	572,596,836,6772,7157,9314,23411	BAD,BCL2,CASP3,STAT1,TP53,KLF4,SIRT1
9_Member	KEGG Pathway	hsa05206	MicroRNAs in cancer	-7.03526	-5.22905	9/299	596,836,2475,4609,5290,5594,7157,10018,23411	BCL2,CASP3,MTOR,MYC,PIK3CA,MAPK1,TP53,BCL2L11,SIRT1
9_Member	GO Biological Processes	GO:0040017	positive regulation of locomotion	-7.01137	-5.20933	11/514	207,596,1432,2475,5286,5293,5594,5788,7070,7157,23411	AKT1,BCL2,MAPK14,MTOR,PIK3C2A,PIK3CD,MAPK1,PTPRC,THY1,TP53,SIRT1
9_Member	GO Biological Processes	GO:0071453	cellular response to oxygen levels	-6.90569	-5.11722	8/221	207,572,596,947,2475,4609,7157,23411	AKT1,BAD,BCL2,CD34,MTOR,MYC,TP53,SIRT1
9_Member	GO Biological Processes	GO:0007569	cell aging	-6.34599	-4.62656	6/109	596,1432,2022,2475,7157,23411	BCL2,MAPK14,ENG,MTOR,TP53,SIRT1
9_Member	GO Biological Processes	GO:0031667	response to nutrient levels	-5.52285	-3.91534	9/454	207,596,1385,2475,4914,5594,6772,7157,23411	AKT1,BCL2,CREB1,MTOR,NTRK1,MAPK1,STAT1,TP53,SIRT1
9_Member	GO Biological Processes	GO:0009991	response to extracellular stimulus	-5.29738	-3.73409	9/484	207,596,1385,2475,4914,5594,6772,7157,23411	AKT1,BCL2,CREB1,MTOR,NTRK1,MAPK1,STAT1,TP53,SIRT1
9_Member	GO Biological Processes	GO:0016032	viral process	-5.22668	-3.67539	11/782	572,581,596,841,1385,5288,5594,6772,7157,10018,23411	BAD,BAX,BCL2,CASP8,CREB1,PIK3C2G,MAPK1,STAT1,TP53,BCL2L11,SIRT1
9_Member	GO Biological Processes	GO:0009267	cellular response to starvation	-4.49217	-3.05095	5/137	596,2475,5594,7157,23411	BCL2,MTOR,MAPK1,TP53,SIRT1
9_Member	GO Biological Processes	GO:0097237	cellular response to toxic substance	-4.48647	-3.04646	6/229	60,572,4914,7157,9314,23411	ACTB,BAD,NTRK1,TP53,KLF4,SIRT1
9_Member	GO Biological Processes	GO:0033032	regulation of myeloid cell apoptotic process	-4.25156	-2.84497	3/28	596,5293,23411	BCL2,PIK3CD,SIRT1
9_Member	GO Biological Processes	GO:0033028	myeloid cell apoptotic process	-4.07472	-2.69553	3/32	596,5293,23411	BCL2,PIK3CD,SIRT1
9_Member	GO Biological Processes	GO:0042594	response to starvation	-3.99876	-2.63138	5/174	596,2475,5594,7157,23411	BCL2,MTOR,MAPK1,TP53,SIRT1
9_Member	GO Biological Processes	GO:0031669	cellular response to nutrient levels	-3.6564	-2.34948	5/206	596,2475,5594,7157,23411	BCL2,MTOR,MAPK1,TP53,SIRT1
9_Member	GO Biological Processes	GO:0016049	cell growth	-3.55736	-2.26261	7/480	207,596,627,1499,2475,7157,23411	AKT1,BCL2,BDNF,CTNNB1,MTOR,TP53,SIRT1
9_Member	GO Biological Processes	GO:0031668	cellular response to extracellular stimulus	-3.39327	-2.12311	5/235	596,2475,5594,7157,23411	BCL2,MTOR,MAPK1,TP53,SIRT1
9_Member	GO Biological Processes	GO:0031647	regulation of protein stability	-3.2475	-1.99403	5/253	596,1385,2597,5594,23411	BCL2,CREB1,GAPDH,MAPK1,SIRT1
9_Member	GO Biological Processes	GO:0001558	regulation of cell growth	-3.22482	-1.97484	6/391	207,596,627,2475,7157,23411	AKT1,BCL2,BDNF,MTOR,TP53,SIRT1
9_Member	GO Biological Processes	GO:0055067	monovalent inorganic cation homeostasis	-3.20641	-1.95798	4/146	596,1813,5594,7157	BCL2,DRD2,MAPK1,TP53
9_Member	GO Biological Processes	GO:0030641	regulation of cellular pH	-2.68067	-1.48753	3/95	596,5594,7157	BCL2,MAPK1,TP53
9_Member	GO Biological Processes	GO:0006885	regulation of pH	-2.59281	-1.40972	3/102	596,5594,7157	BCL2,MAPK1,TP53
9_Member	GO Biological Processes	GO:0030004	cellular monovalent inorganic cation homeostasis	-2.50002	-1.32612	3/110	596,5594,7157	BCL2,MAPK1,TP53
9_Member	GO Biological Processes	GO:0045926	negative regulation of growth	-2.46213	-1.29147	4/233	596,5600,7157,23411	BCL2,MAPK11,TP53,SIRT1
9_Member	GO Biological Processes	GO:0030308	negative regulation of cell growth	-2.05621	-0.912701	3/159	596,7157,23411	BCL2,TP53,SIRT1
10_Summary	Canonical Pathways	M2579	ST DIFFERENTIATION PATHWAY IN PC12 CELLS	-12.5089	-9.97936	8/45	207,1385,4914,5288,5290,5293,5594,5602,107,596,627,836,842,1499,1813,7070,10381,50674,581,9314,1432,5294	AKT1,CREB1,NTRK1,PIK3C2G,PIK3CA,PIK3CD,MAPK1,MAPK10,ADCY1,BCL2,BDNF,CASP3,CASP9,CTNNB1,DRD2,THY1,TUBB3,NEUROG3,BAX,KLF4,MAPK14,PIK3CG
10_Member	Canonical Pathways	M2579	ST DIFFERENTIATION PATHWAY IN PC12 CELLS	-12.5089	-9.97936	8/45	207,1385,4914,5288,5290,5293,5594,5602	AKT1,CREB1,NTRK1,PIK3C2G,PIK3CA,PIK3CD,MAPK1,MAPK10
10_Member	GO Biological Processes	GO:0000904	cell morphogenesis involved in differentiation	-9.72029	-7.56295	15/677	107,596,627,836,842,1385,1499,1813,4914,5290,5293,5594,7070,10381,50674	ADCY1,BCL2,BDNF,CASP3,CASP9,CREB1,CTNNB1,DRD2,NTRK1,PIK3CA,PIK3CD,MAPK1,THY1,TUBB3,NEUROG3
10_Member	GO Biological Processes	GO:0032990	cell part morphogenesis	-9.01738	-6.96253	14/638	107,581,596,627,1385,1499,1813,4914,5290,5293,5594,7070,10381,50674	ADCY1,BAX,BCL2,BDNF,CREB1,CTNNB1,DRD2,NTRK1,PIK3CA,PIK3CD,MAPK1,THY1,TUBB3,NEUROG3
10_Member	GO Biological Processes	GO:0061564	axon development	-8.35601	-6.36101	12/482	107,596,627,1385,1813,4914,5290,5293,5594,7070,9314,10381	ADCY1,BCL2,BDNF,CREB1,DRD2,NTRK1,PIK3CA,PIK3CD,MAPK1,THY1,KLF4,TUBB3
10_Member	GO Biological Processes	GO:0048812	neuron projection morphogenesis	-8.28736	-6.30297	13/603	107,596,627,1385,1499,1813,4914,5290,5293,5594,7070,10381,50674	ADCY1,BCL2,BDNF,CREB1,CTNNB1,DRD2,NTRK1,PIK3CA,PIK3CD,MAPK1,THY1,TUBB3,NEUROG3
10_Member	GO Biological Processes	GO:0120039	plasma membrane bounded cell projection morphogenesis	-8.16849	-6.19447	13/617	107,596,627,1385,1499,1813,4914,5290,5293,5594,7070,10381,50674	ADCY1,BCL2,BDNF,CREB1,CTNNB1,DRD2,NTRK1,PIK3CA,PIK3CD,MAPK1,THY1,TUBB3,NEUROG3
10_Member	GO Biological Processes	GO:0048858	cell projection morphogenesis	-8.15176	-6.17978	13/619	107,596,627,1385,1499,1813,4914,5290,5293,5594,7070,10381,50674	ADCY1,BCL2,BDNF,CREB1,CTNNB1,DRD2,NTRK1,PIK3CA,PIK3CD,MAPK1,THY1,TUBB3,NEUROG3
10_Member	GO Biological Processes	GO:0048667	cell morphogenesis involved in neuron differentiation	-7.77229	-5.86287	12/544	107,596,627,1385,1813,4914,5290,5293,5594,7070,10381,50674	ADCY1,BCL2,BDNF,CREB1,DRD2,NTRK1,PIK3CA,PIK3CD,MAPK1,THY1,TUBB3,NEUROG3
10_Member	GO Biological Processes	GO:0007409	axonogenesis	-7.67684	-5.78978	11/442	107,596,627,1385,1813,4914,5290,5293,5594,7070,10381	ADCY1,BCL2,BDNF,CREB1,DRD2,NTRK1,PIK3CA,PIK3CD,MAPK1,THY1,TUBB3
10_Member	GO Biological Processes	GO:0007411	axon guidance	-5.62867	-4.00318	7/227	627,1385,4914,5290,5293,5594,10381	BDNF,CREB1,NTRK1,PIK3CA,PIK3CD,MAPK1,TUBB3
10_Member	GO Biological Processes	GO:0097485	neuron projection guidance	-5.60344	-3.97978	7/229	627,1385,4914,5290,5293,5594,10381	BDNF,CREB1,NTRK1,PIK3CA,PIK3CD,MAPK1,TUBB3
10_Member	GO Biological Processes	GO:0006935	chemotaxis	-5.58068	-3.96066	10/576	627,1385,1432,4914,5288,5290,5293,5294,5594,10381	BDNF,CREB1,MAPK14,NTRK1,PIK3C2G,PIK3CA,PIK3CD,PIK3CG,MAPK1,TUBB3
10_Member	GO Biological Processes	GO:0042330	taxis	-5.57397	-3.95486	10/577	627,1385,1432,4914,5288,5290,5293,5294,5594,10381	BDNF,CREB1,MAPK14,NTRK1,PIK3C2G,PIK3CA,PIK3CD,PIK3CG,MAPK1,TUBB3
11_Summary	GO Biological Processes	GO:0032844	regulation of homeostatic process	-11.8381	-9.38282	15/479	572,581,596,1432,1499,1813,4609,5293,5566,5594,5600,5788,6772,7070,225689,836,841,1385,5290,7157,5294,5906,23411,843,60,5602,107,947,207,2475	BAD,BAX,BCL2,MAPK14,CTNNB1,DRD2,MYC,PIK3CD,PRKACA,MAPK1,MAPK11,PTPRC,STAT1,THY1,MAPK15,CASP3,CASP8,CREB1,PIK3CA,TP53,PIK3CG,RAP1A,SIRT1,CASP10,ACTB,MAPK10,ADCY1,CD34,AKT1,MTOR
11_Member	GO Biological Processes	GO:0032844	regulation of homeostatic process	-11.8381	-9.38282	15/479	572,581,596,1432,1499,1813,4609,5293,5566,5594,5600,5788,6772,7070,225689	BAD,BAX,BCL2,MAPK14,CTNNB1,DRD2,MYC,PIK3CD,PRKACA,MAPK1,MAPK11,PTPRC,STAT1,THY1,MAPK15
11_Member	GO Biological Processes	GO:0032846	positive regulation of homeostatic process	-10.6631	-8.37563	11/230	572,581,1432,1499,1813,5293,5594,5600,6772,7070,225689	BAD,BAX,MAPK14,CTNNB1,DRD2,PIK3CD,MAPK1,MAPK11,STAT1,THY1,MAPK15
11_Member	KEGG Pathway	hsa05203	Viral carcinogenesis	-9.88588	-7.71263	10/201	572,581,836,841,1385,5290,5293,5566,5594,7157	BAD,BAX,CASP3,CASP8,CREB1,PIK3CA,PIK3CD,PRKACA,MAPK1,TP53
11_Member	GO Biological Processes	GO:0055082	cellular chemical homeostasis	-8.12684	-6.1569	14/749	572,581,596,1813,4609,5290,5294,5566,5594,5788,5906,7070,7157,23411	BAD,BAX,BCL2,DRD2,MYC,PIK3CA,PIK3CG,PRKACA,MAPK1,PTPRC,RAP1A,THY1,TP53,SIRT1
11_Member	Canonical Pathways	M79	PID TRAIL PATHWAY	-7.97585	-6.04099	5/28	841,843,5290,5293,5594	CASP8,CASP10,PIK3CA,PIK3CD,MAPK1
11_Member	GO Biological Processes	GO:0002768	immune response-regulating cell surface receptor signaling pathway	-7.54819	-5.67271	11/455	60,581,596,5290,5293,5566,5594,5602,5788,5906,7070	ACTB,BAX,BCL2,PIK3CA,PIK3CD,PRKACA,MAPK1,MAPK10,PTPRC,RAP1A,THY1
11_Member	GO Biological Processes	GO:0002764	immune response-regulating signaling pathway	-7.25821	-5.42025	12/606	60,581,596,841,5290,5293,5566,5594,5602,5788,5906,7070	ACTB,BAX,BCL2,CASP8,PIK3CA,PIK3CD,PRKACA,MAPK1,MAPK10,PTPRC,RAP1A,THY1
11_Member	GO Biological Processes	GO:0050778	positive regulation of immune response	-6.88441	-5.09993	13/794	60,581,596,841,1432,5290,5293,5566,5594,5788,5906,7070,23411	ACTB,BAX,BCL2,CASP8,MAPK14,PIK3CA,PIK3CD,PRKACA,MAPK1,PTPRC,RAP1A,THY1,SIRT1
11_Member	GO Biological Processes	GO:0002429	immune response-activating cell surface receptor signaling pathway	-6.79826	-5.02295	10/423	60,581,596,5290,5293,5566,5594,5788,5906,7070	ACTB,BAX,BCL2,PIK3CA,PIK3CD,PRKACA,MAPK1,PTPRC,RAP1A,THY1
11_Member	GO Biological Processes	GO:0002757	immune response-activating signal transduction	-6.53174	-4.79605	11/574	60,581,596,841,5290,5293,5566,5594,5788,5906,7070	ACTB,BAX,BCL2,CASP8,PIK3CA,PIK3CD,PRKACA,MAPK1,PTPRC,RAP1A,THY1
11_Member	GO Biological Processes	GO:0048871	multicellular organismal homeostasis	-6.5098	-4.77765	9/345	60,107,581,596,947,1499,1813,5290,5566	ACTB,ADCY1,BAX,BCL2,CD34,CTNNB1,DRD2,PIK3CA,PRKACA
11_Member	GO Biological Processes	GO:0002253	activation of immune response	-6.01933	-4.34325	11/647	60,581,596,841,5290,5293,5566,5594,5788,5906,7070	ACTB,BAX,BCL2,CASP8,PIK3CA,PIK3CD,PRKACA,MAPK1,PTPRC,RAP1A,THY1
11_Member	GO Biological Processes	GO:0034762	regulation of transmembrane transport	-6.00155	-4.32856	10/517	207,581,596,1432,1813,2475,5294,5566,5906,7070	AKT1,BAX,BCL2,MAPK14,DRD2,MTOR,PIK3CG,PRKACA,RAP1A,THY1
11_Member	GO Biological Processes	GO:0051924	regulation of calcium ion transport	-5.62867	-4.00318	7/227	581,596,1499,1813,5294,5566,7070	BAX,BCL2,CTNNB1,DRD2,PIK3CG,PRKACA,THY1
11_Member	GO Biological Processes	GO:0060402	calcium ion transport into cytosol	-5.61918	-3.9946	6/145	581,596,1813,5566,5788,7070	BAX,BCL2,DRD2,PRKACA,PTPRC,THY1
11_Member	GO Biological Processes	GO:0060401	cytosolic calcium ion transport	-5.41918	-3.82809	6/157	581,596,1813,5566,5788,7070	BAX,BCL2,DRD2,PRKACA,PTPRC,THY1
11_Member	GO Biological Processes	GO:0050801	ion homeostasis	-5.3938	-3.80861	11/751	581,596,1813,4609,5294,5566,5594,5788,7070,7157,23411	BAX,BCL2,DRD2,MYC,PIK3CG,PRKACA,MAPK1,PTPRC,THY1,TP53,SIRT1
11_Member	GO Biological Processes	GO:0030003	cellular cation homeostasis	-5.38513	-3.80244	10/606	581,596,1813,4609,5294,5566,5594,5788,7070,7157	BAX,BCL2,DRD2,MYC,PIK3CG,PRKACA,MAPK1,PTPRC,THY1,TP53
11_Member	GO Biological Processes	GO:0010959	regulation of metal ion transport	-5.35777	-3.77792	8/355	207,581,596,1499,1813,5294,5566,7070	AKT1,BAX,BCL2,CTNNB1,DRD2,PIK3CG,PRKACA,THY1
11_Member	GO Biological Processes	GO:0050853	B cell receptor signaling pathway	-5.30996	-3.73958	5/93	581,596,5293,5594,5788	BAX,BCL2,PIK3CD,MAPK1,PTPRC
11_Member	GO Biological Processes	GO:0006873	cellular ion homeostasis	-5.29765	-3.73409	10/620	581,596,1813,4609,5294,5566,5594,5788,7070,7157	BAX,BCL2,DRD2,MYC,PIK3CG,PRKACA,MAPK1,PTPRC,THY1,TP53
11_Member	GO Biological Processes	GO:0050851	antigen receptor-mediated signaling pathway	-5.29566	-3.73409	7/255	581,596,5290,5293,5594,5788,7070	BAX,BCL2,PIK3CA,PIK3CD,MAPK1,PTPRC,THY1
11_Member	GO Biological Processes	GO:0007204	positive regulation of cytosolic calcium ion concentration	-5.00043	-3.49106	7/283	581,596,1813,5294,5566,5788,7070	BAX,BCL2,DRD2,PIK3CG,PRKACA,PTPRC,THY1
11_Member	GO Biological Processes	GO:0055080	cation homeostasis	-4.98044	-3.47457	10/674	581,596,1813,4609,5294,5566,5594,5788,7070,7157	BAX,BCL2,DRD2,MYC,PIK3CG,PRKACA,MAPK1,PTPRC,THY1,TP53
11_Member	GO Biological Processes	GO:0051209	release of sequestered calcium ion into cytosol	-4.91489	-3.41662	5/112	581,1813,5566,5788,7070	BAX,DRD2,PRKACA,PTPRC,THY1
11_Member	GO Biological Processes	GO:0051283	negative regulation of sequestering of calcium ion	-4.91489	-3.41662	5/112	581,1813,5566,5788,7070	BAX,DRD2,PRKACA,PTPRC,THY1
11_Member	GO Biological Processes	GO:0098771	inorganic ion homeostasis	-4.90302	-3.40612	10/688	581,596,1813,4609,5294,5566,5594,5788,7070,7157	BAX,BCL2,DRD2,MYC,PIK3CG,PRKACA,MAPK1,PTPRC,THY1,TP53
11_Member	GO Biological Processes	GO:0006816	calcium ion transport	-4.90195	-3.40573	8/410	581,596,1499,1813,5294,5566,5788,7070	BAX,BCL2,CTNNB1,DRD2,PIK3CG,PRKACA,PTPRC,THY1
11_Member	GO Biological Processes	GO:0003014	renal system process	-4.89612	-3.40262	5/113	107,596,947,1813,5566	ADCY1,BCL2,CD34,DRD2,PRKACA
11_Member	GO Biological Processes	GO:0051282	regulation of sequestering of calcium ion	-4.89612	-3.40262	5/113	581,1813,5566,5788,7070	BAX,DRD2,PRKACA,PTPRC,THY1
11_Member	GO Biological Processes	GO:0032845	negative regulation of homeostatic process	-4.85485	-3.36707	6/197	581,596,1813,5566,5788,7070	BAX,BCL2,DRD2,PRKACA,PTPRC,THY1
11_Member	GO Biological Processes	GO:0051208	sequestering of calcium ion	-4.84085	-3.35474	5/116	581,1813,5566,5788,7070	BAX,DRD2,PRKACA,PTPRC,THY1
11_Member	GO Biological Processes	GO:0051235	maintenance of location	-4.75376	-3.27645	7/309	207,581,1813,5566,5788,7070,23411	AKT1,BAX,DRD2,PRKACA,PTPRC,THY1,SIRT1
11_Member	GO Biological Processes	GO:2000021	regulation of ion homeostasis	-4.7213	-3.24831	6/208	581,596,1813,5566,5788,7070	BAX,BCL2,DRD2,PRKACA,PTPRC,THY1
11_Member	GO Biological Processes	GO:0051480	regulation of cytosolic calcium ion concentration	-4.69127	-3.22278	7/316	581,596,1813,5294,5566,5788,7070	BAX,BCL2,DRD2,PIK3CG,PRKACA,PTPRC,THY1
11_Member	GO Biological Processes	GO:0097553	calcium ion transmembrane import into cytosol	-4.63407	-3.17256	5/128	581,1813,5566,5788,7070	BAX,DRD2,PRKACA,PTPRC,THY1
11_Member	GO Biological Processes	GO:0070838	divalent metal ion transport	-4.55043	-3.09888	8/459	581,596,1499,1813,5294,5566,5788,7070	BAX,BCL2,CTNNB1,DRD2,PIK3CG,PRKACA,PTPRC,THY1
11_Member	GO Biological Processes	GO:0072511	divalent inorganic cation transport	-4.52364	-3.07577	8/463	581,596,1499,1813,5294,5566,5788,7070	BAX,BCL2,CTNNB1,DRD2,PIK3CG,PRKACA,PTPRC,THY1
11_Member	GO Biological Processes	GO:0043269	regulation of ion transport	-4.49336	-3.05095	9/611	207,581,596,1499,1813,2475,5294,5566,7070	AKT1,BAX,BCL2,CTNNB1,DRD2,MTOR,PIK3CG,PRKACA,THY1
11_Member	GO Biological Processes	GO:1903169	regulation of calcium ion transmembrane transport	-4.40302	-2.97451	5/143	581,1813,5294,5566,7070	BAX,DRD2,PIK3CG,PRKACA,THY1
11_Member	GO Biological Processes	GO:0006875	cellular metal ion homeostasis	-4.14525	-2.75712	8/524	581,596,1813,4609,5294,5566,5788,7070	BAX,BCL2,DRD2,MYC,PIK3CG,PRKACA,PTPRC,THY1
11_Member	GO Biological Processes	GO:0050852	T cell receptor signaling pathway	-4.0224	-2.65146	5/172	5290,5293,5594,5788,7070	PIK3CA,PIK3CD,MAPK1,PTPRC,THY1
11_Member	GO Biological Processes	GO:0006874	cellular calcium ion homeostasis	-3.9837	-2.62036	7/409	581,596,1813,5294,5566,5788,7070	BAX,BCL2,DRD2,PIK3CG,PRKACA,PTPRC,THY1
11_Member	GO Biological Processes	GO:0055074	calcium ion homeostasis	-3.91228	-2.56229	7/420	581,596,1813,5294,5566,5788,7070	BAX,BCL2,DRD2,PIK3CG,PRKACA,PTPRC,THY1
11_Member	GO Biological Processes	GO:0010522	regulation of calcium ion transport into cytosol	-3.88383	-2.54012	4/97	581,596,5566,7070	BAX,BCL2,PRKACA,THY1
11_Member	GO Biological Processes	GO:0072503	cellular divalent inorganic cation homeostasis	-3.82444	-2.48787	7/434	581,596,1813,5294,5566,5788,7070	BAX,BCL2,DRD2,PIK3CG,PRKACA,PTPRC,THY1
11_Member	GO Biological Processes	GO:0034765	regulation of ion transmembrane transport	-3.80604	-2.47135	7/437	207,581,1813,2475,5294,5566,7070	AKT1,BAX,DRD2,MTOR,PIK3CG,PRKACA,THY1
11_Member	GO Biological Processes	GO:0055065	metal ion homeostasis	-3.78968	-2.45734	8/590	581,596,1813,4609,5294,5566,5788,7070	BAX,BCL2,DRD2,MYC,PIK3CG,PRKACA,PTPRC,THY1
11_Member	GO Biological Processes	GO:0070588	calcium ion transmembrane transport	-3.78485	-2.45386	6/307	581,1813,5294,5566,5788,7070	BAX,DRD2,PIK3CG,PRKACA,PTPRC,THY1
11_Member	GO Biological Processes	GO:0072507	divalent inorganic cation homeostasis	-3.71618	-2.40125	7/452	581,596,1813,5294,5566,5788,7070	BAX,BCL2,DRD2,PIK3CG,PRKACA,PTPRC,THY1
11_Member	GO Biological Processes	GO:1904062	regulation of cation transmembrane transport	-2.94841	-1.73048	5/295	581,1813,5294,5566,7070	BAX,DRD2,PIK3CG,PRKACA,THY1
11_Member	GO Biological Processes	GO:0051279	regulation of release of sequestered calcium ion into cytosol	-2.94292	-1.72714	3/77	581,5566,7070	BAX,PRKACA,THY1
11_Member	GO Biological Processes	GO:0043270	positive regulation of ion transport	-2.41636	-1.2489	4/240	207,581,1813,7070	AKT1,BAX,DRD2,THY1
12_Summary	GO Biological Processes	GO:0035094	response to nicotine	-10.4181	-8.15516	7/47	572,596,836,1385,1813,4914,5594,107,581,2932,5602,7157,23411,207,2475,9314,627,5566,5290,6657,5788,54205,4907,6855,947,5906,841,842	BAD,BCL2,CASP3,CREB1,DRD2,NTRK1,MAPK1,ADCY1,BAX,GSK3B,MAPK10,TP53,SIRT1,AKT1,MTOR,KLF4,BDNF,PRKACA,PIK3CA,SOX2,PTPRC,CYCS,NT5E,SYP,CD34,RAP1A,CASP8,CASP9
12_Member	GO Biological Processes	GO:0035094	response to nicotine	-10.4181	-8.15516	7/47	572,596,836,1385,1813,4914,5594	BAD,BCL2,CASP3,CREB1,DRD2,NTRK1,MAPK1
12_Member	GO Biological Processes	GO:0048511	rhythmic process	-8.0387	-6.08859	10/312	107,581,596,1385,1813,2932,4914,5602,7157,23411	ADCY1,BAX,BCL2,CREB1,DRD2,GSK3B,NTRK1,MAPK10,TP53,SIRT1
12_Member	GO Biological Processes	GO:0007623	circadian rhythm	-7.34212	-5.49508	8/194	107,1385,1813,2932,4914,5602,7157,23411	ADCY1,CREB1,DRD2,GSK3B,NTRK1,MAPK10,TP53,SIRT1
12_Member	Canonical Pathways	M7871	ST GRANULE CELL SURVIVAL PATHWAY	-6.11891	-4.42394	4/27	836,1385,5594,5602	CASP3,CREB1,MAPK1,MAPK10
12_Member	GO Biological Processes	GO:0001101	response to acid chemical	-5.64088	-4.01262	8/325	207,572,836,1385,2475,4914,7157,9314	AKT1,BAD,CASP3,CREB1,MTOR,NTRK1,TP53,KLF4
12_Member	GO Biological Processes	GO:0007611	learning or memory	-5.51697	-3.9121	7/236	107,836,1385,1813,2475,4914,5594	ADCY1,CASP3,CREB1,DRD2,MTOR,NTRK1,MAPK1
12_Member	GO Biological Processes	GO:0042752	regulation of circadian rhythm	-5.1982	-3.65296	5/98	107,1385,1813,5602,7157	ADCY1,CREB1,DRD2,MAPK10,TP53
12_Member	GO Biological Processes	GO:0050890	cognition	-5.10203	-3.57381	7/273	107,836,1385,1813,2475,4914,5594	ADCY1,CASP3,CREB1,DRD2,MTOR,NTRK1,MAPK1
12_Member	KEGG Pathway	hsa05030	Cocaine addiction	-5.05609	-3.53677	4/49	627,1385,1813,5566	BDNF,CREB1,DRD2,PRKACA
12_Member	GO Biological Processes	GO:0043200	response to amino acid	-4.99181	-3.48384	5/108	572,836,1385,2475,7157	BAD,CASP3,CREB1,MTOR,TP53
12_Member	GO Biological Processes	GO:0007610	behavior	-4.72404	-3.2504	9/571	107,596,836,1385,1813,2475,4914,5594,7157	ADCY1,BCL2,CASP3,CREB1,DRD2,MTOR,NTRK1,MAPK1,TP53
12_Member	GO Biological Processes	GO:0040014	regulation of multicellular organism growth	-4.51318	-3.06774	4/67	596,1385,1813,5290	BCL2,CREB1,DRD2,PIK3CA
12_Member	GO Biological Processes	GO:0035264	multicellular organism growth	-4.40302	-2.97451	5/143	596,1385,1813,2475,5290	BCL2,CREB1,DRD2,MTOR,PIK3CA
12_Member	GO Biological Processes	GO:0021536	diencephalon development	-4.29722	-2.88335	4/76	581,1385,1813,6657	BAX,CREB1,DRD2,SOX2
12_Member	GO Biological Processes	GO:0040018	positive regulation of multicellular organism growth	-4.07472	-2.69553	3/32	596,1385,1813	BCL2,CREB1,DRD2
12_Member	GO Biological Processes	GO:0007616	long-term memory	-3.99485	-2.63051	3/34	107,1813,2475	ADCY1,DRD2,MTOR
12_Member	KEGG Pathway	hsa05034	Alcoholism	-3.92958	-2.57469	5/180	627,1385,1813,5566,5594	BDNF,CREB1,DRD2,PRKACA,MAPK1
12_Member	GO Biological Processes	GO:0006470	protein dephosphorylation	-3.81575	-2.48059	6/303	596,1813,2475,2932,5788,54205	BCL2,DRD2,MTOR,GSK3B,PTPRC,CYCS
12_Member	GO Biological Processes	GO:0007613	memory	-3.7351	-2.41691	4/106	107,1385,1813,2475	ADCY1,CREB1,DRD2,MTOR
12_Member	GO Biological Processes	GO:0043279	response to alkaloid	-3.71942	-2.40314	4/107	836,1813,2475,7157	CASP3,DRD2,MTOR,TP53
12_Member	GO Biological Processes	GO:0021983	pituitary gland development	-3.68789	-2.37659	3/43	1385,1813,6657	CREB1,DRD2,SOX2
12_Member	GO Biological Processes	GO:0016311	dephosphorylation	-3.68699	-2.37653	7/457	596,1813,2475,2932,4907,5788,54205	BCL2,DRD2,MTOR,GSK3B,NT5E,PTPRC,CYCS
12_Member	GO Biological Processes	GO:0008542	visual learning	-3.5454	-2.25492	3/48	1385,1813,2475	CREB1,DRD2,MTOR
12_Member	GO Biological Processes	GO:0060359	response to ammonium ion	-3.50135	-2.21719	4/122	836,1813,2475,5594	CASP3,DRD2,MTOR,MAPK1
12_Member	GO Biological Processes	GO:0007632	visual behavior	-3.41775	-2.1427	3/53	1385,1813,2475	CREB1,DRD2,MTOR
12_Member	GO Biological Processes	GO:0050806	positive regulation of synaptic transmission	-3.37143	-2.10449	4/132	1385,1813,4914,5594	CREB1,DRD2,NTRK1,MAPK1
12_Member	GO Biological Processes	GO:0060291	long-term synaptic potentiation	-3.13763	-1.89986	3/66	1385,1813,5594	CREB1,DRD2,MAPK1
12_Member	GO Biological Processes	GO:0048167	regulation of synaptic plasticity	-3.05777	-1.83003	4/160	1385,1813,5594,6855	CREB1,DRD2,MAPK1,SYP
12_Member	GO Biological Processes	GO:0008306	associative learning	-3.04516	-1.81852	3/71	1385,1813,2475	CREB1,DRD2,MTOR
12_Member	GO Biological Processes	GO:0051224	negative regulation of protein transport	-2.58737	-1.40494	4/215	947,1813,2475,2932	CD34,DRD2,MTOR,GSK3B
12_Member	GO Biological Processes	GO:1904950	negative regulation of establishment of protein localization	-2.55854	-1.3781	4/219	947,1813,2475,2932	CD34,DRD2,MTOR,GSK3B
12_Member	GO Biological Processes	GO:0043666	regulation of phosphoprotein phosphatase activity	-2.51121	-1.33536	3/109	1813,2475,2932	DRD2,MTOR,GSK3B
12_Member	GO Biological Processes	GO:0046887	positive regulation of hormone secretion	-2.33461	-1.17382	3/126	572,1385,1813	BAD,CREB1,DRD2
12_Member	GO Biological Processes	GO:0035304	regulation of protein dephosphorylation	-2.32504	-1.16551	3/127	1813,2475,2932	DRD2,MTOR,GSK3B
12_Member	GO Biological Processes	GO:0046883	regulation of hormone secretion	-2.27026	-1.11386	4/264	572,1385,1813,5906	BAD,CREB1,DRD2,RAP1A
12_Member	GO Biological Processes	GO:1902107	positive regulation of leukocyte differentiation	-2.2603	-1.10514	3/134	572,841,1385	BAD,CASP8,CREB1
12_Member	GO Biological Processes	GO:0009410	response to xenobiotic stimulus	-2.2474	-1.09286	4/268	842,1813,2475,7157	CASP9,DRD2,MTOR,TP53
12_Member	GO Biological Processes	GO:0007612	learning	-2.24248	-1.08887	3/136	1385,1813,2475	CREB1,DRD2,MTOR
12_Member	GO Biological Processes	GO:0046879	hormone secretion	-2.0337	-0.893516	4/309	572,1385,1813,5906	BAD,CREB1,DRD2,RAP1A
13_Summary	GO Biological Processes	GO:0097194	execution phase of apoptosis	-10.3235	-8.08383	8/82	207,581,836,841,842,843,7157,100506742,5594,5602,596,4609,23411,1499,1813,4914,5600,6657,6772,9314,9537,1432,5293,10018,2475,5566,5788,10763,10153,2597	AKT1,BAX,CASP3,CASP8,CASP9,CASP10,TP53,CASP12,MAPK1,MAPK10,BCL2,MYC,SIRT1,CTNNB1,DRD2,NTRK1,MAPK11,SOX2,STAT1,KLF4,TP53I11,MAPK14,PIK3CD,BCL2L11,MTOR,PRKACA,PTPRC,NES,CEBPZ,GAPDH
13_Member	GO Biological Processes	GO:0097194	execution phase of apoptosis	-10.3235	-8.08383	8/82	207,581,836,841,842,843,7157,100506742	AKT1,BAX,CASP3,CASP8,CASP9,CASP10,TP53,CASP12
13_Member	Canonical Pathways	M8873	ST FAS SIGNALING PATHWAY	-9.39007	-7.27723	7/65	581,836,841,843,5594,5602,7157	BAX,CASP3,CASP8,CASP10,MAPK1,MAPK10,TP53
13_Member	GO Biological Processes	GO:0009411	response to UV	-8.57742	-6.56486	8/135	207,581,596,836,842,4609,7157,23411	AKT1,BAX,BCL2,CASP3,CASP9,MYC,TP53,SIRT1
13_Member	GO Biological Processes	GO:0008285	negative regulation of cell proliferation	-7.34234	-5.49508	13/725	581,596,836,1499,1813,4609,4914,5600,6657,6772,7157,9314,9537	BAX,BCL2,CASP3,CTNNB1,DRD2,MYC,NTRK1,MAPK11,SOX2,STAT1,TP53,KLF4,TP53I11
13_Member	GO Biological Processes	GO:0010212	response to ionizing radiation	-6.84039	-5.06117	7/150	581,596,836,1432,4609,7157,23411	BAX,BCL2,CASP3,MAPK14,MYC,TP53,SIRT1
13_Member	GO Biological Processes	GO:0071887	leukocyte apoptotic process	-6.54239	-4.80432	6/101	207,581,5293,7157,10018,23411	AKT1,BAX,PIK3CD,TP53,BCL2L11,SIRT1
13_Member	GO Biological Processes	GO:0045786	negative regulation of cell cycle	-6.13933	-4.44104	11/629	581,596,836,1432,1499,2475,4609,5566,6657,7157,9314	BAX,BCL2,CASP3,MAPK14,CTNNB1,MTOR,MYC,PRKACA,SOX2,TP53,KLF4
13_Member	GO Biological Processes	GO:2000108	positive regulation of leukocyte apoptotic process	-6.05282	-4.37052	4/28	581,5293,7157,23411	BAX,PIK3CD,TP53,SIRT1
13_Member	GO Biological Processes	GO:0034644	cellular response to UV	-5.74414	-4.1056	5/76	581,842,4609,7157,23411	BAX,CASP9,MYC,TP53,SIRT1
13_Member	GO Biological Processes	GO:0071478	cellular response to radiation	-5.22023	-3.67175	6/170	581,842,1432,4609,7157,23411	BAX,CASP9,MAPK14,MYC,TP53,SIRT1
13_Member	GO Biological Processes	GO:0071482	cellular response to light stimulus	-4.91489	-3.41662	5/112	581,842,4609,7157,23411	BAX,CASP9,MYC,TP53,SIRT1
13_Member	GO Biological Processes	GO:0010332	response to gamma radiation	-4.88645	-3.39363	4/54	581,596,4609,7157	BAX,BCL2,MYC,TP53
13_Member	GO Biological Processes	GO:0044770	cell cycle phase transition	-4.54935	-3.09841	9/601	207,581,596,4609,5566,5788,7157,9314,10763	AKT1,BAX,BCL2,MYC,PRKACA,PTPRC,TP53,KLF4,NES
13_Member	GO Biological Processes	GO:0042770	signal transduction in response to DNA damage	-4.53833	-3.08984	5/134	581,842,1432,7157,23411	BAX,CASP9,MAPK14,TP53,SIRT1
13_Member	Canonical Pathways	M145	PID P53 DOWNSTREAM PATHWAY	-4.49217	-3.05095	5/137	581,596,843,7157,10153	BAX,BCL2,CASP10,TP53,CEBPZ
13_Member	Canonical Pathways	M32	PID HDAC CLASSIII PATHWAY	-4.40271	-2.97451	3/25	581,7157,23411	BAX,TP53,SIRT1
13_Member	GO Biological Processes	GO:0007050	cell cycle arrest	-4.25495	-2.84497	6/252	581,2475,4609,5566,6657,7157	BAX,MTOR,MYC,PRKACA,SOX2,TP53
13_Member	Canonical Pathways	M66	PID MYC ACTIV PATHWAY	-4.23121	-2.82738	4/79	581,2597,4609,7157	BAX,GAPDH,MYC,TP53
13_Member	GO Biological Processes	GO:2000106	regulation of leukocyte apoptotic process	-4.14721	-2.75801	4/83	581,5293,7157,23411	BAX,PIK3CD,TP53,SIRT1
13_Member	GO Biological Processes	GO:0000082	G1/S transition of mitotic cell cycle	-4.06308	-2.68649	6/273	207,581,596,4609,7157,9314	AKT1,BAX,BCL2,MYC,TP53,KLF4
13_Member	GO Biological Processes	GO:0048147	negative regulation of fibroblast proliferation	-4.03415	-2.66167	3/33	581,4609,7157	BAX,MYC,TP53
13_Member	GO Biological Processes	GO:2000045	regulation of G1/S transition of mitotic cell cycle	-3.99876	-2.63138	5/174	207,581,596,7157,9314	AKT1,BAX,BCL2,TP53,KLF4
13_Member	GO Biological Processes	GO:0044772	mitotic cell cycle phase transition	-3.94519	-2.58932	8/560	207,581,596,4609,5566,7157,9314,10763	AKT1,BAX,BCL2,MYC,PRKACA,TP53,KLF4,NES
13_Member	GO Biological Processes	GO:0044843	cell cycle G1/S phase transition	-3.90312	-2.55362	6/292	207,581,596,4609,7157,9314	AKT1,BAX,BCL2,MYC,TP53,KLF4
13_Member	GO Biological Processes	GO:1902806	regulation of cell cycle G1/S phase transition	-3.79847	-2.46472	5/192	207,581,596,7157,9314	AKT1,BAX,BCL2,TP53,KLF4
13_Member	Reactome Gene Sets	R-HSA-5633008	TP53 Regulates Transcription of Cell Death Genes	-3.65804	-2.35024	3/44	581,843,7157	BAX,CASP10,TP53
13_Member	GO Biological Processes	GO:2000134	negative regulation of G1/S transition of mitotic cell cycle	-3.59931	-2.30155	4/115	581,596,7157,9314	BAX,BCL2,TP53,KLF4
13_Member	GO Biological Processes	GO:1902807	negative regulation of cell cycle G1/S phase transition	-3.50135	-2.21719	4/122	581,596,7157,9314	BAX,BCL2,TP53,KLF4
13_Member	GO Biological Processes	GO:0007346	regulation of mitotic cell cycle	-3.40432	-2.13009	8/673	207,581,596,1499,5566,7157,9314,23411	AKT1,BAX,BCL2,CTNNB1,PRKACA,TP53,KLF4,SIRT1
13_Member	GO Biological Processes	GO:0045787	positive regulation of cell cycle	-3.34474	-2.08021	6/371	207,581,1813,5566,7157,10018	AKT1,BAX,DRD2,PRKACA,TP53,BCL2L11
13_Member	GO Biological Processes	GO:0010564	regulation of cell cycle process	-3.11409	-1.87856	8/745	207,581,596,1499,1813,5566,7157,9314	AKT1,BAX,BCL2,CTNNB1,DRD2,PRKACA,TP53,KLF4
13_Member	GO Biological Processes	GO:1901990	regulation of mitotic cell cycle phase transition	-3.07915	-1.84994	6/417	207,581,596,5566,7157,9314	AKT1,BAX,BCL2,PRKACA,TP53,KLF4
13_Member	GO Biological Processes	GO:1901987	regulation of cell cycle phase transition	-2.89905	-1.68718	6/452	207,581,596,5566,7157,9314	AKT1,BAX,BCL2,PRKACA,TP53,KLF4
13_Member	GO Biological Processes	GO:0072332	intrinsic apoptotic signaling pathway by p53 class mediator	-2.86399	-1.6567	3/82	581,7157,23411	BAX,TP53,SIRT1
13_Member	GO Biological Processes	GO:0045930	negative regulation of mitotic cell cycle	-2.81653	-1.61308	5/316	581,596,1499,7157,9314	BAX,BCL2,CTNNB1,TP53,KLF4
13_Member	GO Biological Processes	GO:0071158	positive regulation of cell cycle arrest	-2.77578	-1.57442	3/88	581,5566,7157	BAX,PRKACA,TP53
13_Member	GO Biological Processes	GO:0030330	DNA damage response, signal transduction by p53 class mediator	-2.50002	-1.32612	3/110	581,7157,23411	BAX,TP53,SIRT1
13_Member	GO Biological Processes	GO:0071156	regulation of cell cycle arrest	-2.46709	-1.2961	3/113	581,5566,7157	BAX,PRKACA,TP53
13_Member	GO Biological Processes	GO:1901991	negative regulation of mitotic cell cycle phase transition	-2.4489	-1.27952	4/235	581,596,7157,9314	BAX,BCL2,TP53,KLF4
13_Member	GO Biological Processes	GO:1901988	negative regulation of cell cycle phase transition	-2.3232	-1.16398	4/255	581,596,7157,9314	BAX,BCL2,TP53,KLF4
13_Member	GO Biological Processes	GO:0090068	positive regulation of cell cycle process	-2.20832	-1.05564	4/275	581,1813,5566,7157	BAX,DRD2,PRKACA,TP53
14_Summary	GO Biological Processes	GO:0060322	head development	-10.2976	-8.06166	16/731	60,107,572,581,596,836,1385,1499,1813,2475,2932,5594,6657,10018,10763,50674,1432,5566,207,5290,5906,5603	ACTB,ADCY1,BAD,BAX,BCL2,CASP3,CREB1,CTNNB1,DRD2,MTOR,GSK3B,MAPK1,SOX2,BCL2L11,NES,NEUROG3,MAPK14,PRKACA,AKT1,PIK3CA,RAP1A,MAPK13
14_Member	GO Biological Processes	GO:0060322	head development	-10.2976	-8.06166	16/731	60,107,572,581,596,836,1385,1499,1813,2475,2932,5594,6657,10018,10763,50674	ACTB,ADCY1,BAD,BAX,BCL2,CASP3,CREB1,CTNNB1,DRD2,MTOR,GSK3B,MAPK1,SOX2,BCL2L11,NES,NEUROG3
14_Member	Canonical Pathways	M113	PID NFAT 3PATHWAY	-9.97473	-7.79164	7/54	572,581,596,836,1432,2932,5566	BAD,BAX,BCL2,CASP3,MAPK14,GSK3B,PRKACA
14_Member	GO Biological Processes	GO:0007420	brain development	-9.56257	-7.4145	15/695	60,107,572,581,596,836,1385,1499,1813,2475,2932,6657,10018,10763,50674	ACTB,ADCY1,BAD,BAX,BCL2,CASP3,CREB1,CTNNB1,DRD2,MTOR,GSK3B,SOX2,BCL2L11,NES,NEUROG3
14_Member	GO Biological Processes	GO:0048732	gland development	-7.88313	-5.96298	11/422	207,581,596,1385,1499,1813,5290,5594,5906,6657,10018	AKT1,BAX,BCL2,CREB1,CTNNB1,DRD2,PIK3CA,MAPK1,RAP1A,SOX2,BCL2L11
14_Member	GO Biological Processes	GO:0030900	forebrain development	-6.28503	-4.57013	9/367	572,581,836,1385,1499,1813,2932,6657,50674	BAD,BAX,CASP3,CREB1,CTNNB1,DRD2,GSK3B,SOX2,NEUROG3
14_Member	GO Biological Processes	GO:0006970	response to osmotic stress	-4.46264	-3.02798	4/69	572,581,836,5603	BAD,BAX,CASP3,MAPK13
14_Member	GO Biological Processes	GO:0021537	telencephalon development	-4.38281	-2.95577	6/239	572,581,836,1499,1813,2932	BAD,BAX,CASP3,CTNNB1,DRD2,GSK3B
14_Member	GO Biological Processes	GO:0021543	pallium development	-4.13259	-2.74605	5/163	572,581,836,1499,2932	BAD,BAX,CASP3,CTNNB1,GSK3B
14_Member	GO Biological Processes	GO:0021761	limbic system development	-3.79947	-2.46526	4/102	581,836,1813,2932	BAX,CASP3,DRD2,GSK3B
14_Member	GO Biological Processes	GO:0021987	cerebral cortex development	-3.68851	-2.37659	4/109	572,581,1499,2932	BAD,BAX,CTNNB1,GSK3B
15_Summary	Canonical Pathways	M13096	SA PROGRAMMED CELL DEATH	-10.0555	-7.85546	5/12	572,581,596,842,10018,841,2597,836,2022,1499,23411,5788,6772	BAD,BAX,BCL2,CASP9,BCL2L11,CASP8,GAPDH,CASP3,ENG,CTNNB1,SIRT1,PTPRC,STAT1
15_Member	Canonical Pathways	M13096	SA PROGRAMMED CELL DEATH	-10.0555	-7.85546	5/12	572,581,596,842,10018	BAD,BAX,BCL2,CASP9,BCL2L11
15_Member	GO Biological Processes	GO:0044531	modulation of programmed cell death in other organism	-9.16895	-7.09836	4/6	572,841,2597,10018	BAD,CASP8,GAPDH,BCL2L11
15_Member	GO Biological Processes	GO:0044532	modulation of apoptotic process in other organism	-9.16895	-7.09836	4/6	572,841,2597,10018	BAD,CASP8,GAPDH,BCL2L11
15_Member	GO Biological Processes	GO:0052040	modulation by symbiont of host programmed cell death	-9.16895	-7.09836	4/6	572,841,2597,10018	BAD,CASP8,GAPDH,BCL2L11
15_Member	GO Biological Processes	GO:0052248	modulation of programmed cell death in other organism involved in symbiotic interaction	-9.16895	-7.09836	4/6	572,841,2597,10018	BAD,CASP8,GAPDH,BCL2L11
15_Member	GO Biological Processes	GO:0052433	modulation by organism of apoptotic process in other organism involved in symbiotic interaction	-9.16895	-7.09836	4/6	572,841,2597,10018	BAD,CASP8,GAPDH,BCL2L11
15_Member	GO Biological Processes	GO:0044533	positive regulation of apoptotic process in other organism	-7.74631	-5.84863	3/3	572,2597,10018	BAD,GAPDH,BCL2L11
15_Member	GO Biological Processes	GO:0052042	positive regulation by symbiont of host programmed cell death	-7.74631	-5.84863	3/3	572,2597,10018	BAD,GAPDH,BCL2L11
15_Member	GO Biological Processes	GO:0052330	positive regulation by organism of programmed cell death in other organism involved in symbiotic int	-7.74631	-5.84863	3/3	572,2597,10018	BAD,GAPDH,BCL2L11
15_Member	GO Biological Processes	GO:0052501	positive regulation by organism of apoptotic process in other organism involved in symbiotic interac	-7.74631	-5.84863	3/3	572,2597,10018	BAD,GAPDH,BCL2L11
15_Member	GO Biological Processes	GO:0001907	killing by symbiont of host cells	-6.74796	-4.98417	3/5	572,2597,10018	BAD,GAPDH,BCL2L11
15_Member	GO Biological Processes	GO:0044004	disruption by symbiont of host cell	-6.74796	-4.98417	3/5	572,2597,10018	BAD,GAPDH,BCL2L11
15_Member	GO Biological Processes	GO:0052150	modulation by symbiont of host apoptotic process	-6.74796	-4.98417	3/5	572,841,10018	BAD,CASP8,BCL2L11
15_Member	Reactome Gene Sets	R-HSA-111453	BH3-only proteins associate with and inactivate anti-apoptotic BCL-2 members	-6.00225	-4.32856	3/8	572,596,10018	BAD,BCL2,BCL2L11
15_Member	GO Biological Processes	GO:0044068	modulation by symbiont of host cellular process	-5.92794	-4.26408	4/30	572,841,2597,10018	BAD,CASP8,GAPDH,BCL2L11
15_Member	GO Biological Processes	GO:0051712	positive regulation of killing of cells of other organism	-5.41131	-3.82192	3/12	572,2597,10018	BAD,GAPDH,BCL2L11
15_Member	GO Biological Processes	GO:0031960	response to corticosteroid	-5.40325	-3.81723	6/158	572,596,836,842,2022,10018	BAD,BCL2,CASP3,CASP9,ENG,BCL2L11
15_Member	GO Biological Processes	GO:0051709	regulation of killing of cells of other organism	-5.29819	-3.73409	3/13	572,2597,10018	BAD,GAPDH,BCL2L11
15_Member	GO Biological Processes	GO:0044003	modification by symbiont of host morphology or physiology	-5.1669	-3.63147	4/46	572,841,2597,10018	BAD,CASP8,GAPDH,BCL2L11
15_Member	GO Biological Processes	GO:0051883	killing of cells in other organism involved in symbiotic interaction	-5.09819	-3.57381	3/15	572,2597,10018	BAD,GAPDH,BCL2L11
15_Member	GO Biological Processes	GO:0048545	response to steroid hormone	-5.06743	-3.54594	8/389	572,596,836,842,1499,2022,10018,23411	BAD,BCL2,CASP3,CASP9,CTNNB1,ENG,BCL2L11,SIRT1
15_Member	GO Biological Processes	GO:0051818	disruption of cells of other organism involved in symbiotic interaction	-4.92534	-3.42433	3/17	572,2597,10018	BAD,GAPDH,BCL2L11
15_Member	GO Biological Processes	GO:0051384	response to glucocorticoid	-4.4176	-2.98765	5/142	572,596,836,842,10018	BAD,BCL2,CASP3,CASP9,BCL2L11
15_Member	GO Biological Processes	GO:0031341	regulation of cell killing	-4.38967	-2.96205	4/72	572,2597,5788,10018	BAD,GAPDH,PTPRC,BCL2L11
15_Member	GO Biological Processes	GO:0019054	modulation by virus of host process	-4.35029	-2.92845	3/26	572,841,10018	BAD,CASP8,BCL2L11
15_Member	GO Biological Processes	GO:0019048	modulation by virus of host morphology or physiology	-3.84899	-2.51148	3/38	572,841,10018	BAD,CASP8,BCL2L11
15_Member	GO Biological Processes	GO:0051817	modification of morphology or physiology of other organism involved in symbiotic interaction	-3.76696	-2.44203	4/104	572,841,2597,10018	BAD,CASP8,GAPDH,BCL2L11
15_Member	GO Biological Processes	GO:0031343	positive regulation of cell killing	-3.65804	-2.35024	3/44	572,2597,10018	BAD,GAPDH,BCL2L11
15_Member	GO Biological Processes	GO:0051701	interaction with host	-3.59873	-2.30141	5/212	572,841,1499,2597,10018	BAD,CASP8,CTNNB1,GAPDH,BCL2L11
15_Member	GO Biological Processes	GO:0043903	regulation of symbiosis, encompassing mutualism through parasitism	-3.54284	-2.25278	5/218	572,596,2597,6772,10018	BAD,BCL2,GAPDH,STAT1,BCL2L11
15_Member	GO Biological Processes	GO:0031640	killing of cells of other organism	-3.32446	-2.06153	3/57	572,2597,10018	BAD,GAPDH,BCL2L11
15_Member	GO Biological Processes	GO:0044364	disruption of cells of other organism	-3.32446	-2.06153	3/57	572,2597,10018	BAD,GAPDH,BCL2L11
15_Member	GO Biological Processes	GO:0001906	cell killing	-3.24029	-1.98759	4/143	572,2597,5788,10018	BAD,GAPDH,PTPRC,BCL2L11
15_Member	GO Biological Processes	GO:0035821	modification of morphology or physiology of other organism	-3.19529	-1.94878	4/147	572,841,2597,10018	BAD,CASP8,GAPDH,BCL2L11
15_Member	Reactome Gene Sets	R-HSA-204998	Cell death signalling via NRAGE, NRIF and NADE	-2.95936	-1.74071	3/76	572,836,10018	BAD,CASP3,BCL2L11
15_Member	Reactome Gene Sets	R-HSA-193704	p75 NTR receptor-mediated signalling	-2.65488	-1.46444	3/97	572,836,10018	BAD,CASP3,BCL2L11
15_Member	GO Biological Processes	GO:0043900	regulation of multi-organism process	-2.42658	-1.25793	5/389	572,596,2597,6772,10018	BAD,BCL2,GAPDH,STAT1,BCL2L11
16_Summary	GO Biological Processes	GO:0080135	regulation of cellular response to stress	-9.8462	-7.67618	15/663	207,572,581,842,947,1499,2475,2932,4609,5594,7070,7157,9314,10018,23411,596,841,1385,1432,4914,5293,5788,836,5600,6772,6657	AKT1,BAD,BAX,CASP9,CD34,CTNNB1,MTOR,GSK3B,MYC,MAPK1,THY1,TP53,KLF4,BCL2L11,SIRT1,BCL2,CASP8,CREB1,MAPK14,NTRK1,PIK3CD,PTPRC,CASP3,MAPK11,STAT1,SOX2
16_Member	GO Biological Processes	GO:0080135	regulation of cellular response to stress	-9.8462	-7.67618	15/663	207,572,581,842,947,1499,2475,2932,4609,5594,7070,7157,9314,10018,23411	AKT1,BAD,BAX,CASP9,CD34,CTNNB1,MTOR,GSK3B,MYC,MAPK1,THY1,TP53,KLF4,BCL2L11,SIRT1
16_Member	GO Biological Processes	GO:0002521	leukocyte differentiation	-9.48467	-7.35163	13/480	572,581,596,841,1385,1432,1499,2475,4609,4914,5293,5788,23411	BAD,BAX,BCL2,CASP8,CREB1,MAPK14,CTNNB1,MTOR,MYC,NTRK1,PIK3CD,PTPRC,SIRT1
16_Member	GO Biological Processes	GO:0030099	myeloid cell differentiation	-9.35654	-7.25257	12/393	836,841,842,1385,1432,1499,2475,4609,5293,5600,6772,23411	CASP3,CASP8,CASP9,CREB1,MAPK14,CTNNB1,MTOR,MYC,PIK3CD,MAPK11,STAT1,SIRT1
16_Member	GO Biological Processes	GO:0050673	epithelial cell proliferation	-8.05603	-6.0981	11/406	207,572,581,947,1499,2475,4609,5594,6657,6772,23411	AKT1,BAD,BAX,CD34,CTNNB1,MTOR,MYC,MAPK1,SOX2,STAT1,SIRT1
16_Member	GO Biological Processes	GO:0002573	myeloid leukocyte differentiation	-7.41228	-5.55441	8/190	841,1385,1432,1499,2475,4609,5293,23411	CASP8,CREB1,MAPK14,CTNNB1,MTOR,MYC,PIK3CD,SIRT1
16_Member	GO Biological Processes	GO:0045637	regulation of myeloid cell differentiation	-6.59056	-4.84651	8/243	841,1385,1432,1499,2475,4609,5600,6772	CASP8,CREB1,MAPK14,CTNNB1,MTOR,MYC,MAPK11,STAT1
16_Member	GO Biological Processes	GO:0050678	regulation of epithelial cell proliferation	-6.43661	-4.71144	9/352	207,572,581,1499,2475,4609,6657,6772,23411	AKT1,BAD,BAX,CTNNB1,MTOR,MYC,SOX2,STAT1,SIRT1
16_Member	GO Biological Processes	GO:1903706	regulation of hemopoiesis	-5.56206	-3.94476	9/449	572,841,1385,1432,1499,2475,4609,5600,6772	BAD,CASP8,CREB1,MAPK14,CTNNB1,MTOR,MYC,MAPK11,STAT1
16_Member	GO Biological Processes	GO:0050679	positive regulation of epithelial cell proliferation	-4.99676	-3.48809	6/186	207,572,1499,2475,4609,23411	AKT1,BAD,CTNNB1,MTOR,MYC,SIRT1
16_Member	GO Biological Processes	GO:0002761	regulation of myeloid leukocyte differentiation	-4.91489	-3.41662	5/112	841,1385,1499,2475,4609	CASP8,CREB1,CTNNB1,MTOR,MYC
16_Member	GO Biological Processes	GO:1902105	regulation of leukocyte differentiation	-4.22648	-2.82423	6/255	572,841,1385,1499,2475,4609	BAD,CASP8,CREB1,CTNNB1,MTOR,MYC
17_Summary	GO Biological Processes	GO:0009266	response to temperature stimulus	-9.5017	-7.3657	10/220	207,841,947,2475,2932,4914,5566,5594,7157,23411,1432,1499,5290,5600,5602,10381,54205,5906,60,10763	AKT1,CASP8,CD34,MTOR,GSK3B,NTRK1,PRKACA,MAPK1,TP53,SIRT1,MAPK14,CTNNB1,PIK3CA,MAPK11,MAPK10,TUBB3,CYCS,RAP1A,ACTB,NES
17_Member	GO Biological Processes	GO:0009266	response to temperature stimulus	-9.5017	-7.3657	10/220	207,841,947,2475,2932,4914,5566,5594,7157,23411	AKT1,CASP8,CD34,MTOR,GSK3B,NTRK1,PRKACA,MAPK1,TP53,SIRT1
17_Member	GO Biological Processes	GO:0009408	response to heat	-8.05947	-6.09956	8/157	207,947,2475,2932,5566,5594,7157,23411	AKT1,CD34,MTOR,GSK3B,PRKACA,MAPK1,TP53,SIRT1
17_Member	GO Biological Processes	GO:0034605	cellular response to heat	-7.66232	-5.77897	7/114	947,2475,2932,5566,5594,7157,23411	CD34,MTOR,GSK3B,PRKACA,MAPK1,TP53,SIRT1
17_Member	Canonical Pathways	M81	PID CDC42 PATHWAY	-7.49995	-5.63256	6/70	1432,1499,2475,2932,5290,5594	MAPK14,CTNNB1,MTOR,GSK3B,PIK3CA,MAPK1
17_Member	Reactome Gene Sets	R-HSA-2262752	Cellular responses to stress	-6.74175	-4.97921	10/429	1432,2475,2932,5594,5600,5602,7157,10381,23411,54205	MAPK14,MTOR,GSK3B,MAPK1,MAPK11,MAPK10,TP53,TUBB3,SIRT1,CYCS
17_Member	Reactome Gene Sets	R-HSA-8953897	Cellular responses to external stimuli	-6.08602	-4.39609	10/506	1432,2475,2932,5594,5600,5602,7157,10381,23411,54205	MAPK14,MTOR,GSK3B,MAPK1,MAPK11,MAPK10,TP53,TUBB3,SIRT1,CYCS
17_Member	GO Biological Processes	GO:1900034	regulation of cellular response to heat	-5.68798	-4.05414	5/78	947,2475,2932,5594,23411	CD34,MTOR,GSK3B,MAPK1,SIRT1
17_Member	GO Biological Processes	GO:0006606	protein import into nucleus	-5.12285	-3.59187	7/271	207,1432,1499,2475,2932,5594,23411	AKT1,MAPK14,CTNNB1,MTOR,GSK3B,MAPK1,SIRT1
17_Member	GO Biological Processes	GO:0051170	nuclear import	-4.8836	-3.39145	7/295	207,1432,1499,2475,2932,5594,23411	AKT1,MAPK14,CTNNB1,MTOR,GSK3B,MAPK1,SIRT1
17_Member	Canonical Pathways	M261	PID P53 REGULATION PATHWAY	-4.73266	-3.25838	4/59	207,1432,2932,7157	AKT1,MAPK14,GSK3B,TP53
17_Member	GO Biological Processes	GO:0017038	protein import	-4.6303	-3.16942	7/323	207,1432,1499,2475,2932,5594,23411	AKT1,MAPK14,CTNNB1,MTOR,GSK3B,MAPK1,SIRT1
17_Member	GO Biological Processes	GO:0046822	regulation of nucleocytoplasmic transport	-4.62891	-3.16866	6/216	1432,2475,2932,5594,7157,23411	MAPK14,MTOR,GSK3B,MAPK1,TP53,SIRT1
17_Member	GO Biological Processes	GO:1900180	regulation of protein localization to nucleus	-4.55109	-3.09892	6/223	207,1432,2475,2932,5594,23411	AKT1,MAPK14,MTOR,GSK3B,MAPK1,SIRT1
17_Member	GO Biological Processes	GO:0006913	nucleocytoplasmic transport	-4.48395	-3.04453	8/469	207,1432,1499,2475,2932,5594,7157,23411	AKT1,MAPK14,CTNNB1,MTOR,GSK3B,MAPK1,TP53,SIRT1
17_Member	GO Biological Processes	GO:0051169	nuclear transport	-4.4578	-3.02393	8/473	207,1432,1499,2475,2932,5594,7157,23411	AKT1,MAPK14,CTNNB1,MTOR,GSK3B,MAPK1,TP53,SIRT1
17_Member	GO Biological Processes	GO:0034504	protein localization to nucleus	-4.22641	-2.82423	7/374	207,1432,1499,2475,2932,5594,23411	AKT1,MAPK14,CTNNB1,MTOR,GSK3B,MAPK1,SIRT1
17_Member	Reactome Gene Sets	R-HSA-3371556	Cellular response to heat stress	-4.04806	-2.67199	4/88	2475,2932,5594,23411	MTOR,GSK3B,MAPK1,SIRT1
17_Member	GO Biological Processes	GO:0042306	regulation of protein import into nucleus	-4.01054	-2.64066	5/173	1432,2475,2932,5594,23411	MAPK14,MTOR,GSK3B,MAPK1,SIRT1
17_Member	GO Biological Processes	GO:1904589	regulation of protein import	-3.97541	-2.61258	5/176	1432,2475,2932,5594,23411	MAPK14,MTOR,GSK3B,MAPK1,SIRT1
17_Member	GO Biological Processes	GO:0071216	cellular response to biotic stimulus	-3.81969	-2.48406	5/190	207,1432,2932,5594,7157	AKT1,MAPK14,GSK3B,MAPK1,TP53
17_Member	GO Biological Processes	GO:0046824	positive regulation of nucleocytoplasmic transport	-3.52871	-2.24034	4/120	1432,2932,5594,7157	MAPK14,GSK3B,MAPK1,TP53
17_Member	Canonical Pathways	M151	PID AR TF PATHWAY	-3.41775	-2.1427	3/53	1432,2932,23411	MAPK14,GSK3B,SIRT1
17_Member	GO Biological Processes	GO:0032386	regulation of intracellular transport	-3.39371	-2.12314	7/511	1432,2475,2932,5594,5906,7157,23411	MAPK14,MTOR,GSK3B,MAPK1,RAP1A,TP53,SIRT1
17_Member	GO Biological Processes	GO:0033157	regulation of intracellular protein transport	-3.28387	-2.0253	6/381	1432,2475,2932,5594,7157,23411	MAPK14,MTOR,GSK3B,MAPK1,TP53,SIRT1
17_Member	Reactome Gene Sets	R-HSA-3371453	Regulation of HSF1-mediated heat shock response	-3.09978	-1.86716	3/68	2932,5594,23411	GSK3B,MAPK1,SIRT1
17_Member	GO Biological Processes	GO:0090316	positive regulation of intracellular protein transport	-2.28767	-1.13024	4/261	1432,2932,5594,7157	MAPK14,GSK3B,MAPK1,TP53
17_Member	Reactome Gene Sets	R-HSA-212165	Epigenetic regulation of gene expression	-2.14937	-1.00038	3/147	60,2932,23411	ACTB,GSK3B,SIRT1
17_Member	GO Biological Processes	GO:0051493	regulation of cytoskeleton organization	-2.08092	-0.935897	5/471	1499,2475,2932,5594,10763	CTNNB1,MTOR,GSK3B,MAPK1,NES
17_Member	GO Biological Processes	GO:0032388	positive regulation of intracellular transport	-2.05305	-0.909848	4/305	1432,2932,5594,7157	MAPK14,GSK3B,MAPK1,TP53
18_Summary	GO Biological Processes	GO:0001568	blood vessel development	-9.36752	-7.26029	15/718	207,581,947,1432,1499,2022,5286,5290,5294,5594,5906,6772,7070,9314,23411,836,1385,4609,4914,6657,572,2932,50674	AKT1,BAX,CD34,MAPK14,CTNNB1,ENG,PIK3C2A,PIK3CA,PIK3CG,MAPK1,RAP1A,STAT1,THY1,KLF4,SIRT1,CASP3,CREB1,MYC,NTRK1,SOX2,BAD,GSK3B,NEUROG3
18_Member	GO Biological Processes	GO:0001568	blood vessel development	-9.36752	-7.26029	15/718	207,581,947,1432,1499,2022,5286,5290,5294,5594,5906,6772,7070,9314,23411	AKT1,BAX,CD34,MAPK14,CTNNB1,ENG,PIK3C2A,PIK3CA,PIK3CG,MAPK1,RAP1A,STAT1,THY1,KLF4,SIRT1
18_Member	GO Biological Processes	GO:0001944	vasculature development	-9.16324	-7.09588	15/743	207,581,947,1432,1499,2022,5286,5290,5294,5594,5906,6772,7070,9314,23411	AKT1,BAX,CD34,MAPK14,CTNNB1,ENG,PIK3C2A,PIK3CA,PIK3CG,MAPK1,RAP1A,STAT1,THY1,KLF4,SIRT1
18_Member	GO Biological Processes	GO:0072358	cardiovascular system development	-9.09949	-7.04217	15/751	207,581,947,1432,1499,2022,5286,5290,5294,5594,5906,6772,7070,9314,23411	AKT1,BAX,CD34,MAPK14,CTNNB1,ENG,PIK3C2A,PIK3CA,PIK3CG,MAPK1,RAP1A,STAT1,THY1,KLF4,SIRT1
18_Member	GO Biological Processes	GO:0048514	blood vessel morphogenesis	-7.9796	-6.04286	13/640	581,947,1432,1499,2022,5286,5290,5294,5906,6772,7070,9314,23411	BAX,CD34,MAPK14,CTNNB1,ENG,PIK3C2A,PIK3CA,PIK3CG,RAP1A,STAT1,THY1,KLF4,SIRT1
18_Member	GO Biological Processes	GO:0070848	response to growth factor	-7.5645	-5.68739	13/694	207,836,1385,1432,1499,2022,4609,4914,5594,5906,6657,9314,23411	AKT1,CASP3,CREB1,MAPK14,CTNNB1,ENG,MYC,NTRK1,MAPK1,RAP1A,SOX2,KLF4,SIRT1
18_Member	GO Biological Processes	GO:0030855	epithelial cell differentiation	-7.09089	-5.27767	13/762	207,572,836,947,1385,1499,2022,2932,4914,5906,6772,9314,50674	AKT1,BAD,CASP3,CD34,CREB1,CTNNB1,ENG,GSK3B,NTRK1,RAP1A,STAT1,KLF4,NEUROG3
18_Member	GO Biological Processes	GO:0001525	angiogenesis	-6.70864	-4.94987	11/551	947,1432,1499,2022,5286,5290,5294,6772,7070,9314,23411	CD34,MAPK14,CTNNB1,ENG,PIK3C2A,PIK3CA,PIK3CG,STAT1,THY1,KLF4,SIRT1
18_Member	GO Biological Processes	GO:0071363	cellular response to growth factor stimulus	-5.89039	-4.23349	11/667	207,836,1385,1432,1499,2022,4914,5594,5906,9314,23411	AKT1,CASP3,CREB1,MAPK14,CTNNB1,ENG,NTRK1,MAPK1,RAP1A,KLF4,SIRT1
18_Member	GO Biological Processes	GO:1901342	regulation of vasculature development	-5.07555	-3.55335	8/388	947,1499,2022,5286,5906,6772,9314,23411	CD34,CTNNB1,ENG,PIK3C2A,RAP1A,STAT1,KLF4,SIRT1
18_Member	GO Biological Processes	GO:0045765	regulation of angiogenesis	-4.35378	-2.92964	7/357	947,1499,2022,5286,6772,9314,23411	CD34,CTNNB1,ENG,PIK3C2A,STAT1,KLF4,SIRT1
18_Member	GO Biological Processes	GO:1904018	positive regulation of vasculature development	-3.62734	-2.32481	5/209	947,2022,5286,5906,23411	CD34,ENG,PIK3C2A,RAP1A,SIRT1
18_Member	GO Biological Processes	GO:0061448	connective tissue development	-3.33515	-2.07102	5/242	947,1432,1499,5290,23411	CD34,MAPK14,CTNNB1,PIK3CA,SIRT1
18_Member	GO Biological Processes	GO:0045766	positive regulation of angiogenesis	-2.80763	-1.60454	4/187	947,2022,5286,23411	CD34,ENG,PIK3C2A,SIRT1
19_Summary	GO Biological Processes	GO:1904951	positive regulation of establishment of protein localization	-9.10213	-7.04232	13/516	43,572,596,841,947,1432,1813,2597,2932,5594,5600,7157,10018,1385,1499,5293,5294,5603,6772,9314,23411,2475,5906,207,4907,54205	ACHE,BAD,BCL2,CASP8,CD34,MAPK14,DRD2,GAPDH,GSK3B,MAPK1,MAPK11,TP53,BCL2L11,CREB1,CTNNB1,PIK3CD,PIK3CG,MAPK13,STAT1,KLF4,SIRT1,MTOR,RAP1A,AKT1,NT5E,CYCS
19_Member	GO Biological Processes	GO:1904951	positive regulation of establishment of protein localization	-9.10213	-7.04232	13/516	43,572,596,841,947,1432,1813,2597,2932,5594,5600,7157,10018	ACHE,BAD,BCL2,CASP8,CD34,MAPK14,DRD2,GAPDH,GSK3B,MAPK1,MAPK11,TP53,BCL2L11
19_Member	GO Biological Processes	GO:0001816	cytokine production	-7.6311	-5.75235	13/685	947,1385,1432,1499,1813,2597,5293,5294,5600,5603,6772,9314,23411	CD34,CREB1,MAPK14,CTNNB1,DRD2,GAPDH,PIK3CD,PIK3CG,MAPK11,MAPK13,STAT1,KLF4,SIRT1
19_Member	GO Biological Processes	GO:0051223	regulation of protein transport	-6.9479	-5.1554	13/784	43,572,947,1432,1813,2475,2597,2932,5594,5600,5906,7157,23411	ACHE,BAD,CD34,MAPK14,DRD2,MTOR,GAPDH,GSK3B,MAPK1,MAPK11,RAP1A,TP53,SIRT1
19_Member	GO Biological Processes	GO:0051222	positive regulation of protein transport	-6.27773	-4.56396	10/482	43,572,947,1432,1813,2597,2932,5594,5600,7157	ACHE,BAD,CD34,MAPK14,DRD2,GAPDH,GSK3B,MAPK1,MAPK11,TP53
19_Member	GO Biological Processes	GO:0001819	positive regulation of cytokine production	-5.9033	-4.24342	9/408	947,1385,1432,1499,1813,2597,5600,5603,6772	CD34,CREB1,MAPK14,CTNNB1,DRD2,GAPDH,MAPK11,MAPK13,STAT1
19_Member	GO Biological Processes	GO:0050714	positive regulation of protein secretion	-5.50485	-3.90141	7/237	43,572,947,1432,1813,2597,5600	ACHE,BAD,CD34,MAPK14,DRD2,GAPDH,MAPK11
19_Member	GO Biological Processes	GO:1903532	positive regulation of secretion by cell	-5.32204	-3.74841	8/359	43,572,947,1385,1432,1813,2597,5600	ACHE,BAD,CD34,CREB1,MAPK14,DRD2,GAPDH,MAPK11
19_Member	GO Biological Processes	GO:0001817	regulation of cytokine production	-5.29765	-3.73409	10/620	947,1385,1432,1499,1813,2597,5600,5603,6772,9314	CD34,CREB1,MAPK14,CTNNB1,DRD2,GAPDH,MAPK11,MAPK13,STAT1,KLF4
19_Member	GO Biological Processes	GO:0002793	positive regulation of peptide secretion	-5.26237	-3.70238	7/258	43,572,947,1432,1813,2597,5600	ACHE,BAD,CD34,MAPK14,DRD2,GAPDH,MAPK11
19_Member	GO Biological Processes	GO:0051047	positive regulation of secretion	-5.10008	-3.57381	8/385	43,572,947,1385,1432,1813,2597,5600	ACHE,BAD,CD34,CREB1,MAPK14,DRD2,GAPDH,MAPK11
19_Member	GO Biological Processes	GO:0050715	positive regulation of cytokine secretion	-4.87752	-3.38605	5/114	947,1432,1813,2597,5600	CD34,MAPK14,DRD2,GAPDH,MAPK11
19_Member	GO Biological Processes	GO:0050708	regulation of protein secretion	-4.78215	-3.2987	8/426	43,572,947,1432,1813,2597,5600,5906	ACHE,BAD,CD34,MAPK14,DRD2,GAPDH,MAPK11,RAP1A
19_Member	GO Biological Processes	GO:0002791	regulation of peptide secretion	-4.57749	-3.12285	8/455	43,572,947,1432,1813,2597,5600,5906	ACHE,BAD,CD34,MAPK14,DRD2,GAPDH,MAPK11,RAP1A
19_Member	GO Biological Processes	GO:0017144	drug metabolic process	-4.50317	-3.06015	10/766	43,207,572,947,1813,2475,2597,4907,9314,54205	ACHE,AKT1,BAD,CD34,DRD2,MTOR,GAPDH,NT5E,KLF4,CYCS
19_Member	GO Biological Processes	GO:0009306	protein secretion	-4.14525	-2.75712	8/524	43,572,947,1432,1813,2597,5600,5906	ACHE,BAD,CD34,MAPK14,DRD2,GAPDH,MAPK11,RAP1A
19_Member	GO Biological Processes	GO:1903530	regulation of secretion by cell	-4.10998	-2.7266	9/685	43,572,947,1385,1432,1813,2597,5600,5906	ACHE,BAD,CD34,CREB1,MAPK14,DRD2,GAPDH,MAPK11,RAP1A
19_Member	GO Biological Processes	GO:0050707	regulation of cytokine secretion	-4.03433	-2.66167	5/171	947,1432,1813,2597,5600	CD34,MAPK14,DRD2,GAPDH,MAPK11
19_Member	GO Biological Processes	GO:0002790	peptide secretion	-3.96128	-2.60144	8/557	43,572,947,1432,1813,2597,5600,5906	ACHE,BAD,CD34,MAPK14,DRD2,GAPDH,MAPK11,RAP1A
19_Member	GO Biological Processes	GO:0051046	regulation of secretion	-3.86896	-2.52764	9/737	43,572,947,1385,1432,1813,2597,5600,5906	ACHE,BAD,CD34,CREB1,MAPK14,DRD2,GAPDH,MAPK11,RAP1A
19_Member	GO Biological Processes	GO:0050663	cytokine secretion	-3.76709	-2.44203	5/195	947,1432,1813,2597,5600	CD34,MAPK14,DRD2,GAPDH,MAPK11
19_Member	GO Biological Processes	GO:0032102	negative regulation of response to external stimulus	-2.15974	-1.01014	4/284	947,1813,4907,9314	CD34,DRD2,NT5E,KLF4
20_Summary	Canonical Pathways	M186	PID PDGFRB PATHWAY	-8.73437	-6.71276	8/129	4609,5290,5293,5294,5594,5602,5906,6772,207,1432,947,7070,7157,5788	MYC,PIK3CA,PIK3CD,PIK3CG,MAPK1,MAPK10,RAP1A,STAT1,AKT1,MAPK14,CD34,THY1,TP53,PTPRC
20_Member	Canonical Pathways	M186	PID PDGFRB PATHWAY	-8.73437	-6.71276	8/129	4609,5290,5293,5294,5594,5602,5906,6772	MYC,PIK3CA,PIK3CD,PIK3CG,MAPK1,MAPK10,RAP1A,STAT1
20_Member	Reactome Gene Sets	R-HSA-76002	Platelet activation, signaling and aggregation	-5.03049	-3.51475	7/280	207,1432,5290,5293,5294,5594,5906	AKT1,MAPK14,PIK3CA,PIK3CD,PIK3CG,MAPK1,RAP1A
20_Member	GO Biological Processes	GO:0050900	leukocyte migration	-3.61843	-2.31677	7/469	947,1432,5290,5293,5294,7070,7157	CD34,MAPK14,PIK3CA,PIK3CD,PIK3CG,THY1,TP53
20_Member	GO Biological Processes	GO:0045123	cellular extravasation	-3.44224	-2.1639	3/52	5293,5294,7070	PIK3CD,PIK3CG,THY1
20_Member	GO Biological Processes	GO:0014074	response to purine-containing compound	-3.19529	-1.94878	4/147	5294,5906,6772,7157	PIK3CG,RAP1A,STAT1,TP53
20_Member	GO Biological Processes	GO:0051591	response to cAMP	-2.64219	-1.45411	3/98	5294,5906,6772	PIK3CG,RAP1A,STAT1
20_Member	GO Biological Processes	GO:0071621	granulocyte chemotaxis	-2.55712	-1.37734	3/105	1432,5293,5294	MAPK14,PIK3CD,PIK3CG
20_Member	GO Biological Processes	GO:0043299	leukocyte degranulation	-2.53527	-1.35647	6/534	1432,5293,5294,5594,5788,5906	MAPK14,PIK3CD,PIK3CG,MAPK1,PTPRC,RAP1A
20_Member	GO Biological Processes	GO:0002275	myeloid cell activation involved in immune response	-2.50739	-1.33219	6/541	1432,5293,5294,5594,5788,5906	MAPK14,PIK3CD,PIK3CG,MAPK1,PTPRC,RAP1A
20_Member	GO Biological Processes	GO:0002444	myeloid leukocyte mediated immunity	-2.48385	-1.31092	6/547	1432,5293,5294,5594,5788,5906	MAPK14,PIK3CD,PIK3CG,MAPK1,PTPRC,RAP1A
20_Member	GO Biological Processes	GO:0097530	granulocyte migration	-2.39381	-1.22986	3/120	1432,5293,5294	MAPK14,PIK3CD,PIK3CG
20_Member	GO Biological Processes	GO:0046683	response to organophosphorus	-2.28758	-1.13024	3/131	5294,5906,6772	PIK3CG,RAP1A,STAT1
20_Member	GO Biological Processes	GO:0060326	cell chemotaxis	-2.25308	-1.09823	4/267	1432,5290,5293,5294	MAPK14,PIK3CA,PIK3CD,PIK3CG
20_Member	GO Biological Processes	GO:0002274	myeloid leukocyte activation	-2.19761	-1.04562	6/627	1432,5293,5294,5594,5788,5906	MAPK14,PIK3CD,PIK3CG,MAPK1,PTPRC,RAP1A
20_Member	GO Biological Processes	GO:0002366	leukocyte activation involved in immune response	-2.01171	-0.873621	6/687	1432,5293,5294,5594,5788,5906	MAPK14,PIK3CD,PIK3CG,MAPK1,PTPRC,RAP1A
20_Member	GO Biological Processes	GO:0002263	cell activation involved in immune response	-2.00007	-0.862875	6/691	1432,5293,5294,5594,5788,5906	MAPK14,PIK3CD,PIK3CG,MAPK1,PTPRC,RAP1A
